# Supplementary material for: Metabolomic approaches to dissect dysregulated metabolism in the progression of pre-diabetes to T2DM
Source: Royal Society of Chemistry journal article supplement (doi:10.1039/d3mo00130j), 2024-04-30
Supplement: d3mo00130j5.xlsx [file d3mo00130j5.xlsx]

## Sheet: Sheet2
Supplemental Table 1 Detail of each individual subjects.
sample name	gender	age	FPG	SYS	DIA	BMI	WAIST	WHR	TG	TC	HDL	LDL	ALT	AST	GT	UREA	CREA	UA	HbA1		HOMA-B		HOMA-IR	FINS
Ac20	M	48	4.75	117	80	25.46	85	0.9	2.19	7.31	1.56	4.71	24	26.3	59	4.71	64.5	368.2	171.618	1.78692	61.2236	-0.0926899	0.807812	3.82648
Ac24	M	44	5.06	119	76	25.95	87	0.84	1.78	4.61	1.3	2.52	20.8	24.4	26.5	5.69	77.9	404.1	161.94	1.83703	68.7122	0.0810963	1.2053	5.35955
Ac30	F	41	5.36	127	81	22.31	71	0.79	0.74	3.98	1.02	2.17	7.1	22.3	13.2	2.23	52.3	190.9	125.886	1.76433	58.1211	0.109799	1.28765	5.40526
Ac32	F	47	4.6	128	73	19.05	68	0.75	1.03	5.65	1.56	2.98	17.1	28	14.7	4.12	52	268.4	152.374	1.92119	83.4054	-0.0278677	0.937848	4.5873
Ac37	M	43	5.34	129	89	24.03	82	0.81	2.1	5.02	1.13	3	20.8	25.6	39	5.1	67.6	340.4	193.239	1.62086	41.7696	-0.0399932	0.912025	3.8428
Ac4	M	37	4.76	129	86	27.34	87	0.9	2.26	3.19	0.95	1.79	17.1	23.5	24.4	5.01	79.5	343.9	166.128	1.8723	74.5247	-0.00293495	0.993265	4.69505
Ac51	M	57	5.59	124	89	26.2	90	0.9	3.16	3.72	0.99	2.1	22.7	32.6	29.4	4.13	76.2	544.3	124.811	1.68299	48.1941	0.0973393	1.25124	5.03628
Ac59	F	41	4.32	121	71	19.13	70	0.78	0.85	3.64	1.35	1.57	34.33	27.6	35.8	5.72	51	255.8	138.228	2.09778	125.25	-0.00613701	0.985968	5.13525
Ac61	F	46	5.06	116	73	21.77	70	0.74	1.58	5.69	1.51	3.29	11	23.1	21.9	5.14	62.4	320.1	187.554	1.83512	68.4096	0.0791796	1.2	5.33595
Ac69	M	41	4.59	121	71	25.5	90	0.88	1.6	4.89	1.23	2.82	30.6	30.1	34.6	7.09	82.1	397.5	169.482	1.97329	94.036	0.0193206	1.04549	5.12496
Ac71	M	44	4.73	107	73	25.18	92	0.88	1.81	4.21	1.02	2.42	30.3	28.6	24.7	4.29	69.5	300	188.747	1.87695	75.3277	-0.0114914	0.973887	4.63266
Ac78	M	59	5.25	122	75	27.06	98	0.98	2.52	5.27	1.57	2.85	14.1	20.1	40.7	5.07	75.9	386.3	195.606	1.70003	50.1217	0.0100103	1.02332	4.38565
Ac79	F	45	5.34	114	70	20.2	70	0.74	1.13	5.62	1.73	2.68	17.3	19.8	21.7	3.64	63.1	185	132.801	1.70652	50.877	0.0456682	1.11088	4.68069
Ac8	F	56	5.45	119	78	25.78	79	0.84	1.02	5.54	1.66	3	25.1	26.5	22.4	6.47	56.5	363.1	130.301	1.74197	55.2042	0.115191	1.30374	5.38241
Ac86	F	44	4.63	101	63	22.19	68	0.77	1.26	4.75	1.32	2.64	18.4	31.2	47.3	5.72	57.2	194.7	178.548	1.90089	79.5954	-0.0336648	0.925412	4.49714
Ac87	F	50	4.35	108	65	19.1	72	0.8	1.17	5.35	1.46	3.05	24.8	25.8	42.8	4.91	62.4	291.4	207.535	2.01619	103.797	-0.0691192	0.852866	4.41138
Ac92	F	42	4.75	112	71	22.5	74	0.77	0.75	3.3	1.19	1.47	5.4	19.2	13.3	4.1	56.2	200.2	138.944	1.92102	83.3716	0.0414094	1.10004	5.21073
Ax55	M	47	5	133	86	23.89	83	0.86	1.31	4.82	1.33	2.51	4.7	21.5	22.2	5.3	69.9	331.6	150.381	1.8641	73.1308	0.0859489	1.21885	5.48481
Ax81	F	32	4.39	107	72	18.78	62	0.74	0.48	4.81	1.86	2.05	19.5	26.7	35.2	5.22	63.7	259.6	198.856	2.00928	102.16	-0.0520752	0.887002	4.54614
Ax83	M	39	4.29	129	81	21.91	77	0.79	0.69	4.71	1.22	2.75	24.9	27.7	29.7	5.33	68.2	314.9	177.506	2.11447	130.159	-0.00865519	0.980268	5.14127
Bx23	F	25	5.75	109	73	21.67	73	0.78	0.66	4.37	1.45	2.18	9.2	14.1	22.8	3	54.8	277	194.096	1.67131	46.9151	0.129951	1.34881	5.27795
Bx24	M	35	5.63	110	58	19.96	77	0.92	1.31	4.38	1.97	1.69	16.1	18.7	14	4.6	72.2	259.6	157.348	1.6569	45.3834	0.0825725	1.20941	4.83333
Bx25	M	44	5.66	116	76	26.89	96	0.94	2.42	4.14	1.19	2.19	44	23.7	24.6	3.45	57.4	253.3	200.648	1.7097	51.2509	0.143759	1.39238	5.5351
Bx26	M	33	5.7	112	74	24.34	88	0.91	1.11	3.59	1.05	2.06	42.4	22.5	37.4	3.32	60.2	363.3	158.203	1.71037	51.3296	0.155453	1.43038	5.64625
Bx28	M	50	5.97	128	85	24.86	89	0.93	2.4	6.92	1.55	4.1	51.5	32.4	237.6	6.65	76	517.5	197.799	1.6765	47.4784	0.191955	1.5558	5.86359
Bx37	M	27	5.82	114	68	25.34	92	0.95	1.83	5.02	1.12	3.13	21.4	23	37.4	3.27	84.4	354.7	154.186	1.53897	34.5914	0.0161663	1.03793	4.0126
Bx40	F	35	5.6	108	77	18.59	62	0.72	0.87	5.03	1.5	2.58	8.7	19.6	24.3	5.11	50.8	331.3	205.215	1.78764	61.3247	0.20483	1.60262	6.43909
Bx52	M	60	5.82	129	80	31.31	107	0.97	2	5.67	1.47	3.19	15.1	22.5	80.8	3.86	66.8	386.2	200.371	1.54893	35.3936	0.0261236	1.062	4.10566
Bx54	M	28	5.86	127	71	26.28	83	0.79	1.23	5.12	1.52	2.56	18.3	25.6	67.6	5.2	74	388.8	190.106	1.71239	51.569	0.199986	1.58484	6.08514
Bx56	F	46	5.75	99	61	21.3	68	0.74	0.88	5.31	1.38	2.93	8.1	20.9	16.1	6.42	48.7	185.3	209.532	1.69779	49.8643	0.156427	1.4336	5.60973
Bx57	M	42	5.69	119	85	24	83	0.89	1.21	2.63	0.97	1.23	24.3	26.2	19.9	5.09	81.2	419.2	218.807	1.75088	56.3485	0.193226	1.56036	6.17016
Bx59	M	50	5.76	112	75	22.76	80	0.87	1.74	0.94	0.94	3.96	27.5	26.5	32	6.07	70.3	255.9	191.098	1.64323	43.9778	0.104552	1.27219	4.96949
Bx61	M	34	5.69	119	80	26.99	91	1.03	1.24	3.87	1.06	2.23	15.3	21.3	24.2	6.73	59.3	343.6	177.04	1.70805	51.0561	0.150392	1.41381	5.59065
Bx62	M	45	5.86	128	90	25.26	89	0.91	2.95	4.09	1.09	2.41	25.5	26.5	31.4	6.19	67	388.7	193.781	1.65232	44.9081	0.139922	1.38014	5.29916
Bx68	M	55	5.6	123	85	24.69	95	0.95	2.51	4.42	0.9	2.74	43.5	37.6	40.9	2.97	75.6	425.9	173.656	1.74758	55.9212	0.164771	1.46141	5.87173
Bx72	F	48	5.87	139	77	26.56	81	0.79	1.68	5.3	1.28	2.99	12.3	24.6	25.7	3.82	56.8	305.5	166.953	1.68242	48.1309	0.172598	1.48798	5.70351
Bx74	M	34	5.6	124	82	30.45	96	0.96	5.48	3.79	1.07	2.01	29.3	42.9	77.3	3.63	53.2	452.8	227.86	1.67951	47.8095	0.0967092	1.24942	5.02
Bx80	M	56	5.69	114	68	22.22	84	0.84	1.67	4.31	1.19	2.42	8.8	19.4	18.1	5.81	72.2	334.6	220.671	1.65694	45.3884	0.0992888	1.25687	4.97003
Bx81	F	49	5.62	120	79	18.82	73	0.81	0.98	5.36	1.71	2.54	7.5	25.2	16	5.02	50.5	215.1	204.08	1.69916	50.0218	0.122019	1.3244	5.30231
Bx88	F	33	6.02	125	73	24.84	72	0.75	1.69	5.63	1.63	2.94	6	23.5	17	4.14	58.6	193	184.82	1.64899	44.5646	0.176775	1.50236	5.61514
Cc106	M	53	6.95	115	74	21.15	75	0.83	1.28	4.45	1.33	2.48	15	18.8	28.5	4.85	80.9	280.9	253.103	1.59115	39.0076	0.317741	2.07845	6.72881
Cc113	M	53	6.14	109	67	24.57	87	0.89	5.03	7.33	1.51	4.67	44.6	28.3	50.7	4.25	78.7	487.2	213.44	1.71341	51.6906	0.269971	1.86196	6.82315
Cc124	F	56	6.4	124	68	19.78	66	0.78	0.83	5.52	1.72	2.74	17	20.8	30.7	4.22	46.9	249.5	263.481	1.62379	42.0521	0.239154	1.73442	6.09756
Cc128	F	54	6.35	117	68	24.52	82	0.87	1.1	5.7	1.34	3.67	11.9	21.1	15	5.31	64.2	274.4	238.609	1.56194	36.4702	0.166344	1.46671	5.197
Cc158	M	44	6.23	112	72	23.88	81	0.92	5.02	4.29	1.24	2.19	42.2	31.1	84.3	5	78.1	306.8	241.353	1.66338	46.0657	0.240816	1.74107	6.28797
Cx121	M	41	6.45	124	71	26.49	92	0.94	5	12.1	1.65	8.83	64.8	37.3	59.6	3.85	77.5	522.2	240.15	1.57042	37.1893	0.196587	1.57249	5.48542
Cx133	M	54	6.51	122	79	24.74	87	0.9	3.13	6.77	1.36	4.26	13.9	20.8	16.2	5.52	83.8	499.5	211.508	1.62575	42.2423	0.264683	1.83943	6.35747
Cx142	M	40	6.36	123	82	24.62	87	0.88	3.44	5.61	0.9	2.61	25.5	22.4	24.7	3.59	76.5	424	216.182	1.60093	39.8962	0.207542	1.61266	5.70516
Cx145	M	51	6.31	106	72	24.17	80	0.88	1.67	6.51	1.5	3.3	21.1	19.6	25.3	5.5	68.5	285	240.157	1.67869	47.7193	0.274217	1.88026	6.70456
Cx146	F	56	6.73	121	68	21.87	77	0.8	1.29	5.43	1.28	2.7	15.7	18.3	39.8	5.49	43.3	228.2	213.965	1.60877	40.6226	0.292772	1.96233	6.56055
Cx149	F	51	6.35	107	71	22.31	78	0.81	4.29	5.14	1.3	2.66	49.7	51.9	61.8	2.52	52.5	291	251.766	1.597	39.537	0.20141	1.59005	5.63402
Cx150	F	42	6.68	131	79	24.44	79	0.81	2	4.02	1.03	1.82	6.7	15	20.7	3	50.6	206.8	207.315	1.56531	36.7545	0.239302	1.73501	5.84397
Cx23	F	47	6.55	123	70	24.09	77	0.83	1.73	4.8	0.96	2.81	29.5	27	29.3	3.04	40.7	309.6	216.654	1.63701	43.3525	0.284343	1.92461	6.61126
Cx25	F	49	6.42	105	66	19.71	66	0.78	1.08	6	1.45	3.65	25.6	23.5	21.2	4.95	51.1	313.4	187.194	1.5894	38.8505	0.209102	1.61846	5.67218
Cx49	F	47	6.27	121	77	21.87	75	0.84	2.11	6.35	1.35	4.13	19.3	24.2	24.3	3.36	50.1	231.5	232.96	1.57713	37.7684	0.163664	1.45769	5.23093
Cx50	M	35	6.15	131	86	26.26	83	0.83	2.66	5.74	1.28	3.73	20.7	24.9	25.8	4.55	84.2	365.7	209.362	1.67641	47.4687	0.235316	1.71916	6.28961
Cx61	F	48	6.39	116	65	24.68	80	0.82	0.9	4.7	1.2	2.75	23.8	30.1	20.1	3	51.5	180.2	214.523	1.57461	37.5504	0.187801	1.54099	5.42604
Cx63	M	35	6.65	125	85	34.95	107	0.9	1.61	4.63	1.18	2.7	36.5	25.4	44.3	5.33	54.4	454.1	250.818	1.57837	37.8765	0.24629	1.76315	5.96556
Cx87	F	46	6.25	127	83	22.51	75	0.85	2.22	5.64	1.62	3.01	32.1	41.6	25.4	6.73	68.3	368.2	205.478	1.57688	37.747	0.158882	1.44172	5.19021
Cx88	F	41	6.17	128	82	25.4	79	0.77	1.55	4.76	1.23	2.65	13.2	20.2	24.6	4.33	47.9	195.4	229.597	1.63522	43.1735	0.198801	1.58052	5.76366
Dc206	F	49	11.52	111	69	25.24	83	0.86	3.11	7.27	1.4	4.78	39.6	27.2	61.7	7.1	65	287.8	266.083	1.18003	15.1366	0.492441	3.10772	6.06976
Dc263	M	46	13.15	114	71	22.68	81	0.85	0.92	4.59	1.3	2.46	17.4	19.7	18.3	5.36	54.5	215.9	237.217	1.13575	13.6694	0.58599	3.85469	6.59548
Dc292	F	43	10.39	125	83	23.63	75	0.8	1.86	5.7	1.51	3.22	18.4	20.1	37.8	4.45	44.8	242.5	226.463	1.28931	19.4673	0.490929	3.09691	6.7065
Dc312	M	54	10.63	121	71	24.09	81	0.88	3.26	6.35	1.41	3.91	26.3	20.8	87.8	3.72	52.4	264.9	262.177	1.28167	19.1281	0.508081	3.22167	6.81915
Dc335	M	44	7.2	110	74	27.76	99	0.96	2.96	4.18	0.99	2.51	20.1	23.6	36.8	4.95	71.1	414.6	256.348	1.57214	37.3369	0.344459	2.21034	6.90732
Dc339	M	38	16.6	129	87	20.15	88	0.88	16.65	8.22	1.82	4.74	9.2	15.1	52.8	3.86	51.3	336.1	272.31	1.00918	10.2137	0.693352	4.93573	6.69
Dc341	F	48	8.71	123	71	24.98	87	0.88	2	5.15	1.34	2.84	57.3	37.5	40	4.24	51.6	367.9	275.591	1.37155	23.526	0.375192	2.37242	6.12854
Dc342	F	43	7.66	112	67	25.56	80	0.86	2.23	5.89	1.25	3.58	12.2	15.7	49.3	3.41	50.1	287.8	238.632	1.49643	31.3637	0.346536	2.22094	6.52364
Dx1	F	46	11.06	101	63	25.32	83	0.9	1.76	5.86	1.29	4.12	75.7	43.6	96	4.59	37.5	259.1	223.551	1.27828	18.9794	0.547347	3.52652	7.17421
Dx102	F	36	9.32	128	80	26.72	85	0.85	0.71	3.31	1.14	1.63	19.5	26.1	25	3.32	45.5	258.8	240.278	1.3418	21.9684	0.422925	2.64804	6.39281
Dx111	M	53	12.75	106	70	22.4	90	0.89	2.13	6.1	1.28	3.43	39.6	29.4	51	5.1	66.6	229.6	230.708	1.16244	14.5358	0.58088	3.8096	6.72283
Dx20	F	44	7.63	112	76	23.42	77	0.86	1.7	6.25	1.46	3.71	21.8	24.7	27.6	6.24	47.7	319.3	246.853	1.55039	35.5132	0.395652	2.48686	7.33348
Dx25	M	41	11.83	119	70	24.11	76	0.84	0.93	4.47	0.84	2.69	11.6	17	25.8	4.2	60.8	267.1	241.441	1.21665	16.4682	0.557063	3.60631	6.859
Dx31	M	41	13.17	114	78	20.2	77	0.86	1.3	5.22	0.97	3.24	13.3	16.2	22.4	7.85	51.5	166.3	192.843	1.09922	12.5666	0.551017	3.55645	6.07594
Dx49	M	47	8.63	118	74	24.09	82	0.86	1.09	3.58	1.18	1.79	24.9	33.5	78.1	3.86	66.7	233.8	263.134	1.45683	28.6303	0.449742	2.81671	7.34368
Dx73	M	43	11.59	126	83	22.13	88	0.92	2.16	5.07	1.21	2.96	29.8	25.1	33.5	3.75	58.3	276.3	282.916	1.24916	17.7486	0.567984	3.69814	7.17931
Dx76	F	40	15.75	112	70	22.67	76	0.78	1.86	5.19	1.41	2.87	16.1	25.4	16.6	2.23	40.4	173.8	250.082	1.08431	12.1426	0.716516	5.20615	7.43735
Dx79	F	45	7.33	122	75	23.03	77	0.79	1.24	4.68	1.51	2.25	13.1	18.6	16.8	5.52	52.2	292.4	279.551	1.53583	34.3426	0.330924	2.14252	6.57662
Dx84	M	29	14.36	145	67	26.6	96	0.86	2.6	4.32	0.92	2.77	44.3	32.3	31	4.55	79.3	386.6	264.642	1.07898	11.9945	0.618752	4.15674	6.51299
Dx94	M	46	13.45	126	81	26.77	95	0.94	3.33	6.32	1.52	3.24	56.8	31.9	269.8	4.73	61	303.9	274.04	1.18563	15.3331	0.658964	4.55999	7.62823
