# Supplementary material for: Metabolomic approaches to dissect dysregulated metabolism in the progression of pre-diabetes to T2DM
Source: Royal Society of Chemistry journal article supplement (doi:10.1039/d3mo00130j), 2024-04-30
Supplement: d3mo00130j6.xlsx [file d3mo00130j6.xlsx]

## Sheet: Sheet1
									Supplemental Table 2. A total of 683 metabolites were detected
Index	Compounds	Class I	Class II	Q1 (Da)	Molecular Weight (Da)	Ionization model	Formula	Ac20	Ac24	Ac30	Ac32	Ac37	Ac4	Ac51	Ac59	Ac61	Ac69	Ac71	Ac78	Ac79	Ac8	Ac86	Ac87	Ac92	Ax55	Ax81	Ax83	Bx24	Bx25	Bx26	Bx28	Bx37	Bx40	Bx52	Bx54	Bx56	Bx57	Bx59	Bx61	Bx62	Bx68	Bx72	Bx74	Bx80	Bx81	BX23	Bx88	Cc106	Cc113
MEDN0004	L-Cystine	Amino acid and Its metabolomics	Amino acids	239.016	240.024	[M-H]-	C6H12N2O4S2	39603	47129	64827	55406	39547	27805	49640	44261	65029	50788	46922	45370	48087	52751	28831	72164	56215	40152	42816	40199	51384	65045	76127	55392	55098	70093	57686	59527	37955	57365	52204	63644	41883	61545	38572	51020	65464	34873	66426	34396	55527	35264
MEDN0007	L-Arginine	Amino acid and Its metabolomics	Amino acids	173.104	174.112	[M-H]-	C6H14N4O2	1973500	1191100	2231200	2449300	2441300	1895200	1305900	1520600	1277600	2952100	1297600	1801600	1698300	1847900	1252100	2143200	2282300	1237300	1726100	1803700	1679300	1646700	2411200	1913300	1539300	2216700	1512400	1906700	2213300	1701700	2780500	1580200	2577800	1528500	1764700	2777500	2337400	1716700	1706700	1794400	1752300	2026100
MEDN0009	L-Aspartic Acid	Amino acid and Its metabolomics	Amino acids	132.03	133.038	[M-H]-	C4H7NO4	1982200	1512400	1769400	1403200	1562200	1518000	2090400	1050600	1939500	1254700	1216400	1035600	1157400	1875300	1771200	1935200	1672800	1609600	977750	1385400	855350	1426000	1529100	1096500	1347800	1479200	1458000	1929600	1737000	1641800	1742200	1513200	1502500	1804600	2139000	1445900	1256700	1667300	680770	1730600	937890	1516800
MEDN0010	L-Citrulline	Amino acid and Its metabolomics	Amino acids	174.088	175.096	[M-H]-	C6H13N3O3	3379600	2714900	1939200	2889600	3052400	2883000	2752600	2577500	3079000	3391900	2761500	3419100	2815800	4360200	2578400	2817900	2483500	3902100	2923900	2271400	2449300	2750800	2393500	2968800	2669700	2603500	2097400	2276800	3363000	3248300	3008700	2503600	2228800	2639600	2951200	4350500	3834600	3098800	3638100	4211600	2725400	2807100
MEDN0011	L-Glutamic Acid	Amino acid and Its metabolomics	Amino acids	146.045	147.053	[M-H]-	C5H9NO4	10336000	7314300	4951300	6227200	7932100	6162500	11168000	4504200	8379600	6036600	7126900	6989100	6477200	9162900	8763800	10098000	8902300	7309800	6950600	5893400	5306100	11010000	6888800	4011300	9850700	12338000	6387200	10452000	9025200	9020200	7635000	6180500	6508500	8267800	9282100	5986000	4627600	7440700	2954200	7201700	6260100	9632500
MEDN0018	L-Serine	Amino acid and Its metabolomics	Amino acids	104.035	105.043	[M-H]-	C3H7NO3	539780	514090	476050	479670	487390	413980	567580	380640	474790	456460	548510	464980	508390	618700	688810	499180	711420	654180	466040	499020	383960	451170	518490	510360	426150	600510	418850	657640	553100	655140	529540	416290	654270	541260	663570	536170	530940	633470	570970	578050	552580	515050
MEDN0028	4-Hydroxy-L-Glutamic Acid	Amino acid and Its metabolomics	Amino acid derivatives	162.04	163.032	[M-H]-	C5H9NO5	62012	42119	69736	73870	66292	98536	39171	62016	39311	112070	49475	15021	46825	26208	51015	14473	58459	28030	22127	59550	49044	58501	79590	43679	39731	20752	59026	55266	89420	40187	61363	20570	74173	44266	78530	74682	64722	52399	45724	49772	81904	67997
MEDN0033	Asp-phe	Amino acid and Its metabolomics	Small Peptide	279.098	280.106	[M-H]-	C13H16N2O5	439610	291260	629900	345020	609950	401780	258570	585760	607220	701860	360100	530600	840440	585490	189550	350790	197030	208030	123460	908230	499070	314710	1123900	384420	264640	480110	424950	1003700	840220	256050	277920	206120	187120	217980	235400	765120	570100	223090	212920	105460	322570	434730
MEDN0038	Glutathione Oxidized	Amino acid and Its metabolomics	Small Peptide	611.144	612.152	[M-H]-	C20H32N6O12S2	105110	117390	121810	111970	121000	99301	133380	145970	129440	105070	108660	110830	153170	126400	137220	112370	130730	140600	144410	131330	167710	205940	143870	222510	184920	128930	155780	104850	115170	99295	130730	215810	103750	124570	117920	102680	128350	133420	142410	148650	142940	112960
MEDN0041	Hexanoyl Glycine	Amino acid and Its metabolomics	Amino acid derivatives	172.097	173.105	[M-H]-	C8H15NO3	11081	7645.1	6867.4	9724.1	5019.9	2023.8	15582	3843.1	7593.6	11755	10848	11281	16375	7277	18979	4838.9	9606.7	10392	14327	9488	4896.6	10041	6464.6	13759	2750.7	14842	3273.3	72794	17490	8042.6	10402	3412.9	11973	11110	9984.8	16487	39266	15320	42840	3712.7	12413	17794
MEDN0042	L-Asparagine Anhydrous	Amino acid and Its metabolomics	Amino acids	131.046	132.054	[M-H]-	C4H8N2O3	519950	398090	321740	407590	391500	423570	334960	268120	300230	360160	422830	411380	398870	440270	396980	493370	446540	346970	324430	371400	282220	347050	363320	352670	304570	394150	319590	428560	418290	409190	378520	332890	371490	382680	454370	412470	355140	444370	322590	413870	426630	431470
MEDN0045	L-Cysteine	Amino acid and Its metabolomics	Amino acids	120.012	121.02	[M-H]-	C3H7NO2S	737930	921610	831440	967780	961200	888150	797920	939740	756390	849570	1029300	1038200	787780	892750	964740	804870	971760	805290	898370	873550	930460	717280	842730	637050	516680	1022400	773510	1022800	988410	704280	848500	472410	1196800	746070	923610	736600	1091900	902370	938320	879530	944530	795200
MEDN0046	L-Glutamine	Amino acid and Its metabolomics	Amino acids	145.061	146.069	[M-H]-	C5H10N2O3	2930000	3107400	2574700	2778300	3567900	3685000	2327600	2033300	2593800	3157300	3001600	3164500	2447000	3156000	2503700	2876600	2859100	2929800	2457800	2511300	3572700	1797500	2833100	2950700	2020800	1977700	2675100	2627200	2990200	3852600	3061000	2678800	2891300	3326800	2982200	3519700	3767400	3198300	3674400	3258200	2822100	2905300
MEDN0047	L-Homocitrulline	Amino acid and Its metabolomics	Amino acids	188.104	189.111	[M-H]-	C7H15N3O3	32858	61872	20327	40000	51578	38753	72632	45364	63555	69096	37139	69464	50262	55637	52133	53986	30511	22981	107640	94549	57250	46254	50634	32360	42469	81099	26078	51279	45616	40121	43522	17678	23632	33918	53988	76919	56038	53871	86378	98147	54007	101260
MEDN0049	L-Saccharopine	Amino acid and Its metabolomics	Amino acids	275.124	276.132	[M-H]-	C11H20N2O6	91143	97975	74269	59651	143100	163580	92518	72068	99073	90189	98740	113360	156010	124130	71019	101850	100100	108600	54993	100950	154060	99454	136500	117310	100080	156100	97730	96736	123460	131330	109970	110350	92302	121970	100970	107380	127810	70067	81527	133300	83715	104650
MEDN0052	N6-Acetyl-L-Lysine	Amino acid and Its metabolomics	Amino acid derivatives	187.108	188.116	[M-H]-	C8H16N2O3	42775	491900	69881	67644	58343	69148	66022	67529	60165	47891	73938	76477	65990	43393	63698	61019	81164	62048	73813	76923	49439	46324	51153	46353	37309	64104	59741	54264	74484	39420	59526	47372	78018	54876	79682	65210	80326	64716	71030	50022	51015	38630
MEDN0056	N-Acetyl-L-Leucine	Amino acid and Its metabolomics	Amino acid derivatives	172.097	173.105	[M-H]-	C8H15NO3	188320	1244400	128100	111030	197830	148740	169800	177030	134470	181490	138160	177820	133040	155610	131250	163560	103770	100580	131800	134440	98902	123100	175180	90422	95206	138550	114740	173910	154240	124480	162970	110090	120160	146010	121390	181570	154890	123580	193070	100570	180820	161540
MEDN0057	N-Acetyl-L-Tyrosine	Amino acid and Its metabolomics	Amino acid derivatives	222.077	223.085	[M-H]-	C11H13NO4	18514	27645	15224	20305	20932	21206	18427	14051	26785	17740	18793	24949	18158	24903	25220	17419	13689	16188	18885	16993	11507	17412	18226	12255	18586	28915	16733	21610	25182	16751	28092	14051	15426	28498	27807	22176	36259	20605	24758	12966	21689	25042
MEDN0060	N-Isovaleroylglycine	Amino acid and Its metabolomics	Amino acid derivatives	158.082	159.09	[M-H]-	C7H13NO3	3398.7	11032	5495.4	10836	11432	13597	4101.4	7218.4	6894.4	33272	11033	21685	36144	7243.6	24359	7098.6	11032	18855	37572	6838.2	5903	2181.9	6898.5	3253.7	2272.7	5594.2	8071.4	7210.1	14029	7689	8034.3	2461.3	2295.2	4203.6	8095.7	22320	9734.8	11050	34938	14682	12447	8195.7
MEDN0061	N-Phenylacetylglycine	Amino acid and Its metabolomics	Amino acid derivatives	192.066	193.074	[M-H]-	C10H11NO3	10567	7027.3	4166.7	3721.7	4198.6	4139.9	5351.4	2745.4	4266.4	3994.5	6291.3	3997.5	2329.8	5503.9	2179.4	6408	1555	3382.2	3809.5	4435.9	2746	5066.8	3246.3	2460.6	4662.7	9973.3	4963.1	7634	5607.7	4108.7	4094.9	3211.2	4532.9	5283.6	4626.8	5915.4	4055.9	3192.5	5423.5	4255	4616.1	5955.9
MEDN0062	N-Propionylglycine	Amino acid and Its metabolomics	Amino acids	130.05	131.058	[M-H]-	C5H9NO3	805850	742000	571750	690270	968720	623480	802090	513360	766320	890870	842560	816870	620480	724460	567070	616840	646740	666840	805540	488900	469220	604450	816340	387480	617450	734280	590820	1212700	869310	679100	679400	499090	637760	781910	810980	747040	640840	718880	752120	505780	828580	906310
MEDN0065	O-Phospho-L-Serine	Amino acid and Its metabolomics	Amino acid derivatives	184.001	185.009	[M-H]-	C3H8NO6P	789850	857340	535850	602900	675230	717390	1015400	442630	760100	756900	686360	810130	473390	783900	431090	639900	564190	662940	585250	526070	526610	599350	666510	497230	808590	1108700	635320	895920	954300	812410	716100	453950	653170	745060	771440	828100	824010	535740	729050	340830	765990	1020500
MEDN0067	Phe-Phe	Amino acid and Its metabolomics	Small Peptide	311.14	312.147	[M-H]-	C18H20N2O3	1236400	1001100	2957100	1404700	2457900	1547900	1352100	2372300	2197500	2139800	1805900	2424100	1640800	1385200	1770100	1785600	1235800	876140	2382500	1159400	2039200	722700	3734500	1458200	1686500	691710	1705600	2355800	2680000	841140	624790	983320	1958200	134900	2010400	1931500	2191600	1752400	1261000	833090	2036200	1283800
MEDN0068	S-(5-Adenosy)-L-Homocysteine	Amino acid and Its metabolomics	Amino acid derivatives	383.114	384.122	[M-H]-	C14H20N6O5S	61621	71220	33133	62214	66053	47556	68750	38083	73400	62144	57864	62919	29470	58342	32942	39216	40884	37700	64350	37999	32164	34579	34630	14961	42291	56102	42762	58815	74587	33658	53927	25079	42753	72166	52713	72800	49369	58086	39657	29950	62592	77562
MEDN0071	S-Sulfo-L-Cysteine	Amino acid and Its metabolomics	Amino acid derivatives	199.969	200.977	[M-H]-	C3H7NO5S2	24556	27259	18028	23279	11512	19027	34124	7645.5	17072	37299	22526	20580	16386	38900	15132	36255	19218	52680	45339	52377	11005	12621	26947	16947	26732	41389	20239	28244	19254	37200	36273	16237	7033.1	39187	25631	20299	34294	17483	37350	26814	24808	33539
MEDN0086	Terephthalic Acid	Benzene and substituted derivatives	Phenolic acids	165.019	166.027	[M-H]-	C8H6O4	945280	869490	802560	832230	641740	693650	701880	773250	682110	745500	842090	578410	685200	807910	785190	919420	620890	730770	865010	748520	726580	715330	889450	713110	890770	514960	725440	784520	891280	934720	627430	845370	752970	817020	756510	699680	761760	760690	782120	1031600	725460	833250
MEDN0087	(3,4-Dimethoxyphenyl) Acetic Acid	Benzene and substituted derivatives	Phenolic acids	195.066	196.074	[M-H]-	C10H12O4	7442	6241.5	2094.1	5094.4	3396.1	5970.4	5317.8	2184.6	3693	8651.2	7173.3	4536.9	4100.5	4505.4	2230.2	3199.1	4412.9	4921.4	4723.3	3870.7	5284.4	3473.3	4914.7	2718.9	3848.5	5508.4	13683	4315.2	3699.9	6135.8	3319.2	2189.5	6070.9	3424.9	5858.6	6702.7	5336.9	6463.7	4733.7	6062.7	3898.4	2818.5
MEDN0099	4-Pyridoxic Acid	Heterocyclic compounds	Pteridines and derivatives	182.045	183.053	[M-H]-	C8H9NO4	215060	61854	42797	76978	60479	61123	64094	40422	78282	53853	52010	69442	44504	50300	32514	39524	25444	51304	122270	133270	24141	38440	33700	11703	37874	74946	46566	40595	89072	58798	30074	31722	32087	32637	50448	48380	53851	24917	30030	20713	74421	54936
MEDN0106	Taurochenodesoxycholic Acid	Bile acids	Bile acids	498.289	499.297	[M-H]-	C26H45NO6S	336920	439350	202970	94349	354600	237310	224930	226990	741110	356270	631530	688170	336590	252310	226980	275500	206810	313950	224170	118570	411220	639340	448720	193650	580240	1145200	409680	1116500	611170	543190	469200	146910	410170	391210	349590	534170	400290	231310	336150	133820	518560	445180
MEDN0110	Glycoursodeoxycholic Acid	Bile acids	Bile acids	448.306	449.314	[M-H]-	C26H43NO5	4562400	1766100	4299300	553140	4402200	1827900	8698000	746430	5522500	5000700	1891100	3584900	2513000	670070	7774000	460770	3143100	2381100	10145000	202530	528560	5212400	519410	5361400	1084400	7636100	3654100	7791800	1915800	1065300	5564300	1110700	1189300	2740300	9534600	2590200	4852400	2290700	11969000	2072700	1979200	867320
MEDN0112	Glycocholic Acid	Bile acids	Bile acids	464.301	465.309	[M-H]-	C26H43NO6	192150	173640	506870	132670	274090	205100	880320	700380	378280	916800	134350	73530	357120	145340	269460	118960	409420	340150	739250	130740	177450	217600	183370	191630	165130	1055800	349990	208820	295190	238690	953110	128630	280840	325280	806450	264730	739550	711830	756790	542490	220890	66692
MEDN0113	Glycochenodeoxycholic Acid	Bile acids	Bile acids	448.306	449.314	[M-H]-	C26H43NO5	36056000	22679000	61103000	8450600	50409000	21036000	89717000	49858000	17155000	46393000	8481300	19386000	15106000	9465800	16938000	8748900	70780000	16487000	50116000	6122700	25994000	56014000	7662200	49939000	10314000	36535000	43999000	24401000	34179000	21598000	29611000	7021300	6037900	39940000	129880000	29680000	42856000	35154000	56789000	48952000	20674000	16093000
MEDN0120	Dulcitol	Carboxylic acids and derivatives	Sugar alcohols	181.071	182.079	[M-H]-	C6H14O6	11225	8521.6	9404.2	12153	19403	18150	15719	6786.5	14474	11093	12261	10187	14938	7821.4	4986.5	14414	11936	18318	12127	20488	18214	5586.1	9546.6	5532.1	7769.6	14643	22562	22721	17304	9000.6	11225	15454	8674.8	8982.1	24660	10549	12234	21460	12182	16126	7087.9	13273
MEDN0136	1,7-Dimethylxanthine	Nucleotide And Its metabolomics	Nucleotide and Its metabolomics	179.057	180.065	[M-H]-	C7H8N4O2	800.35	1195400	49922	239240	631120	414.22	611180	15838	1715900	3026.9	722770	4966000	913310	7274.3	659610	23684	490.44	991700	5573.5	15234	601670	633180	544190	1834.6	477540	1932300	166980	579530	774810	921150	584.62	1402.6	2199.3	217850	584.76	524770	416540	1014.9	119050	20669	537500	95442
MEDN0139	1-Methylxanthine	Nucleotide And Its metabolomics	Nucleotide and Its metabolomics	165.041	166.049	[M-H]-	C6H6N4O2	11437	176390	21066	93463	93985	10825	187590	12556	398270	14003	170940	385620	368660	11101	179700	16506	11404	385190	14350	7427.6	172080	145070	78095	8218.3	91856	157040	39356	76227	124190	353890	10947	4710.4	10833	82885	18606	173380	105390	18261	15630	18596	200750	27194
MEDN0140	Xanthine	Nucleotide And Its metabolomics	Nucleotide and Its metabolomics	151.026	152.033	[M-H]-	C5H4N4O2	6799700	7043800	2968200	5380000	5973200	3554400	4368400	2717700	3683800	5564400	5516800	2951600	3779700	6441500	3256000	5664300	4507400	4430000	4138500	3043900	2268300	3504800	5103100	1787300	3047100	7551300	3036500	8382800	6023200	5992600	8725000	2556100	5475500	10147000	7003000	3598100	3407100	4520700	2711000	2934600	2713100	9360300
MEDN0144	3-Methylxanthine	Nucleotide And Its metabolomics	Nucleotide and Its metabolomics	165.041	166.049	[M-H]-	C6H6N4O2	16646	244780	23958	108130	117110	12679	219020	18364	477600	15207	221710	485340	466210	14856	214820	15228	15413	478460	21261	9837.5	208940	207620	94609	6387.4	120920	197930	53111	91239	140350	423280	10425	6389.6	15323	101720	20196	204130	123880	17360	26624	21950	243740	34181
MEDN0147	5-Methylcytosine	Nucleotide And Its metabolomics	Nucleotide and Its metabolomics	124.051	125.059	[M-H]-	C5H7N3O	396360	278960	309110	339330	344460	336240	327040	275030	327330	371990	355020	295150	407010	396140	210150	418840	278850	262320	323050	266110	307140	428910	427770	322240	326100	369180	447250	428140	424440	381500	457380	302080	374460	306090	488910	482150	298450	424570	314460	389440	389970	553260
MEDN0148	5-Methyluridine	Nucleotide And Its metabolomics	Nucleotide and Its metabolomics	257.077	258.085	[M-H]-	C10H14N2O6	17549	33187	21636	25733	30799	31196	27574	27688	38071	34981	50081	36566	21992	21420	20837	19171	36081	21602	27359	23194	28578	18004	23592	19878	22257	27458	35502	33062	34925	23966	21974	13781	25274	18248	41147	31330	33424	21198	27223	16131	41314	28734
MEDN0149	7-Methylxanthine	Nucleotide And Its metabolomics	Nucleotide and Its metabolomics	165.041	166.049	[M-H]-	C6H6N4O2	8437.5	122210	11121	59924	67256	5710.4	111120	9856.8	255150	9251.6	109490	246980	222120	7708.2	110300	11170	9057.6	238920	12402	6216.2	98421	101200	49957	4236.6	65477	98343	23401	48569	79150	215910	6386.2	4149.3	9347.8	61856	15161	99009	69074	11039	14558	14759	134260	14624
MEDN0150	8-Hydroxyguanosine	Nucleotide And Its metabolomics	Nucleotide and Its metabolomics	298.079	299.087	[M-H]-	C10H13N5O6	12473	7690.5	17843	15070	11321	16492	14167	9757.6	20669	9319.3	14956	17913	10872	9434.7	12518	11745	6104.7	17135	9534.6	10285	8263.9	15234	11072	14472	15389	10267	15740	14643	13092	19057	9315.1	13781	10894	20722	12625	8457	15383	11424	12968	24474	11886	13911
MEDN0156	Cytidine-5-Monophosphate	Nucleotide And Its metabolomics	Nucleotide and Its metabolomics	322.044	323.052	[M-H]-	C9H14N3O8P	12977	13503	18892	15120	12977	12961	10787	21058	10801	12422	20515	16182	18896	11329	12959	11335	14043	9989.7	20790	13502	13499	9721.6	21062	7072.3	4590.1	10803	9709	8097.5	16850	14055	17879	6527.5	25424	10260	15113	17275	22662	14038	16209	12963	19444	9718.6
MEDN0163	Hypoxanthine	Nucleotide And Its metabolomics	Nucleotide and Its metabolomics	135.031	136.039	[M-H]-	C5H4N4O	16616000	14049000	4967700	10095000	10742000	8762800	11678000	3793000	8387200	4755000	11769000	6706500	6461700	23502000	8718800	11075000	13826000	10940000	2851700	5494300	3384500	4954500	6603700	2692400	4053100	7283800	4061700	14821000	9924600	12182000	9835400	6727900	7760300	9555600	21236000	6540600	3832000	10570000	5450700	6714400	4801100	10451000
MEDN0171	Uridine	Nucleotide And Its metabolomics	Nucleotide and Its metabolomics	243.062	244.07	[M-H]-	C9H12N2O6	1101800	1117800	674030	1109000	910210	751930	1218100	639740	1378400	1142600	1102700	805250	813980	1118000	793040	879200	1170900	746130	961620	953930	492360	461830	908710	357140	656660	1303900	724330	1496800	1093200	656520	635380	569220	867150	551220	1112600	991960	760800	892530	698130	741410	1102200	1199000
MEDN0172	Β-Nicotinamide Mononucleotide	Nucleotide And Its metabolomics	Nucleotide and Its metabolomics	333.049	334.057	[M-H]-	C11H15N2O8P	17284	22145	17812	17818	16738	18898	14038	19439	17284	23765	21058	19978	22690	21598	22132	23751	14038	16738	15657	25379	15118	17555	24299	16743	11883	27000	28081	24830	24831	17818	24306	10261	21101	20511	19433	29152	28081	33482	23219	17282	17278	29161
MEDN0177	3,3',5-Triiodo-L-Thyronine	Hormones and hormone related compunds	Hormones and hormone related compunds	649.782	650.79	[M-H]-	C15H12I3NO4	4967.4	4292.9	4849.8	6298.7	6646.6	4921.9	4160.7	3272.7	5943.8	5959	4986.1	6992.8	5073.3	3589.4	4650.9	4663.6	3275.4	4166.5	5538.1	3363	4867.9	2504.7	5173.8	2654	5589.9	6249.3	4384.8	5512.3	5319.1	4144.1	5237.9	3089.5	5723.2	3226.4	9162	7076	5721.4	5076.9	7811	2153.9	6600.1	6038.4
MEDN0179	L-Thyroxine	Hormones and hormone related compunds	Hormones and hormone related compunds	775.679	776.687	[M-H]-	C15H11I4NO4	309760	369860	482580	383610	373130	263720	288360	327610	358490	341960	385830	301710	298850	359290	262040	300440	345340	325260	354530	210430	341420	143630	377860	215600	229550	325890	285350	315790	448260	253320	354140	135980	493780	243580	534730	452970	368740	291030	432780	201420	466900	423980
MEDN0180	Norepinephrine	Hormones and hormone related compunds	Hormones and hormone related compunds	168.066	169.074	[M-H]-	C8H11NO3	30683	14610	10914	16351	22004	14289	34927	9952.6	23867	13028	13272	19019	12162	16089	26901	22329	21973	16128	24524	14355	15103	18072	19034	7279.7	16664	29297	19925	34915	30035	15898	19019	13457	20129	19168	23345	27228	11946	23895	2126.1	18991	15564	27462
MEDN0202	α-Ketoglutaric Acid（α-KG）	Organic acid And Its derivatives	Organic acid And Its derivatives	145.014	146.022	[M-H]-	C5H6O5	67401	107910	15986	46293	66994	102590	233260	86067	136870	222520	209040	100140	63397	98240	107850	90346	60142	34834	185610	88874	87441	73693	110690	22429	158060	711650	98462	255960	286570	141590	148250	44820	82086	130340	86611	106890	40519	71541	39574	31535	86688	346270
MEDN0204	Pyruvic Acid	Organic acid And Its derivatives	Organic acid And Its derivatives	87.0082	88.016	[M-H]-	C3H4O3	3918	5841.4	7849.4	2105.5	3010.1	4892.4	11631	11427	6161.1	9411.6	7371.5	4389.5	6588.2	5897.4	12276	15081	6221.9	8266.9	7759.2	4036.3	6992.9	4676.2	6178.6	5081.9	5759.8	7641.4	8557.2	5006.5	6270.2	7731.5	8152.8	3511.6	6666.7	4390.5	2787.4	8126	8764.9	9255.9	3579.7	4400.2	5807	6256.2
MEDN0206	Citramalic Acid	Organic acid And Its derivatives	Organic acid And Its derivatives	147.029	148.1	[M-H]-	C5H8O5	29040	7920.5	5495.3	16241	45429	21749	29282	17943	21863	16720	56250	39820	15184	13717	19420	19717	40233	33008	25497	16661	18885	16836	18004	11116	14679	28477	35905	29210	33031	19545	30898	22535	37698	17787	43654	41701	20481	29879	22366	8827.8	34926	22234
MEDN0210	1,5-Anhydro-D-Glucitol	Carboxylic acids and derivatives	Sugar alcohols	163.061	164.069	[M-H]-	C6H12O5	98413	115280	132170	56073	103960	34376	57242	94852	251450	94524	117300	98169	73317	77562	45475	72810	121640	233280	85279	142300	91018	76446	77631	143130	70241	161140	86816	124500	163640	49422	199250	44946	490560	64099	71289	179080	91557	169140	195390	40513	190600	179270
MEDN0213	D-Sorbitol	Carboxylic acids and derivatives	Sugar alcohols	181.071	182.079	[M-H]-	C6H14O6	11225	8521.6	9404.2	12153	19403	18150	15719	6786.5	14474	11093	12261	10187	14938	7821.4	4986.5	14414	11936	18318	12127	20488	18214	5586.1	9546.6	5532.1	7769.6	14643	22562	22721	17304	9000.6	11225	15454	8674.8	8982.1	24660	10549	12234	21460	12182	16126	7087.9	13273
MEDN0220	D-Glucose	Carboxylic acids and derivatives	Sugars	179.057	180.063	[M-H]-	C6H12O6	49270	49355	93223	76255	69577	60302	49480	82143	70505	76201	60730	67010	86257	68972	51117	51628	47991	39676	94927	49919	87269	68438	113870	75605	86620	76976	93045	63649	93933	66538	85221	68916	73905	57269	77412	78450	107660	73987	89098	81117	117700	85491
MEDN0221	D-Mannose	Carboxylic acids and derivatives	Sugars	179.057	180.063	[M-H]-	C6H12O6	49270	49355	93223	76255	69577	60302	49480	82143	70505	76201	60730	67010	86257	68972	51117	51628	47991	39676	94927	49919	87269	68438	113870	75605	86620	76976	93045	63649	93933	66538	85221	68916	73905	57269	77412	78450	107660	73987	89098	81117	117700	85491
MEDN0224	D-Trehalose	Carboxylic acids and derivatives	Sugars	341.108	342.116	[M-H]-	C12H22O11	639420	723830	912330	703280	748840	725690	816900	956700	751900	776280	732030	686020	961670	864190	829180	861810	846610	705540	821260	838150	1048300	1041500	881720	978650	763630	943620	983430	676100	659890	743340	721940	730140	746570	884840	754680	650770	868410	940180	1070900	989710	813410	582180
MEDN0229	Lactose	Carboxylic acids and derivatives	Sugars	341.108	342.116	[M-H]-	C12H22O11	639420	723830	912330	703280	748840	725690	816900	956700	751900	776280	732030	686020	961670	864190	829180	861810	846610	705540	821260	838150	1048300	1041500	881720	978650	763630	943620	983430	676100	659890	743340	721940	730140	746570	884840	754680	650770	868410	940180	1070900	989710	813410	582180
MEDN0230	Lactulose	Carboxylic acids and derivatives	Sugars	341.108	342.116	[M-H]-	C12H22O11	639420	723830	912330	703280	748840	725690	816900	956700	751900	776280	732030	686020	961670	864190	829180	861810	846610	705540	821260	838150	1048300	1041500	881720	978650	763630	943620	983430	676100	659890	743340	721940	730140	746570	884840	754680	650770	868410	940180	1070900	989710	813410	582180
MEDN0231	L-Fucose	Carboxylic acids and derivatives	Sugars	163.061	164.069	[M-H]-	C6H12O5	98413	115280	132170	56073	103960	34376	57242	94852	251450	94524	117300	98169	73317	77562	45475	72810	121640	233280	85279	142300	91018	76446	77631	143130	70241	161140	86816	124500	163640	49422	199250	44946	490560	64099	71289	179080	91557	169140	195390	40513	190600	179270
MEDN0232	L-Rhamnose	Carboxylic acids and derivatives	Sugars	163.061	164.069	[M-H]-	C6H12O5	98413	115280	132170	56073	103960	34376	57242	94852	251450	94524	117300	98169	73317	77562	45475	72810	121640	233280	85279	142300	91018	76446	77631	143130	70241	161140	86816	124500	163640	49422	199250	44946	490560	64099	71289	179080	91557	169140	195390	40513	190600	179270
MEDN0233	Maltose	Carboxylic acids and derivatives	Sugars	341.108	342.116	[M-H]-	C12H22O11	639420	723830	912330	703280	748840	725690	816900	956700	751900	776280	732030	686020	961670	864190	829180	861810	846610	705540	821260	838150	1048300	1041500	881720	978650	763630	943620	983430	676100	659890	743340	721940	730140	746570	884840	754680	650770	868410	940180	1070900	989710	813410	582180
MEDN0237	D-Glucoronic Acid	Carboxylic acids and derivatives	Sugar acids	193.036	194.043	[M-H]-	C6H10O7	40709	65343	43351	46210	67888	53003	10958	60581	35121	48963	25503	83597	50251	46430	32575	36730	38023	41047	52268	31229	74006	44406	48873	34995	49813	79336	50485	39300	101770	31088	69067	36964	30103	18127	54477	86323	66860	31045	58822	38441	65765	76983
MEDN0238	D-Glyceric Acid	Organic acid And Its derivatives	Organic acid And Its derivatives	105.019	106.027	[M-H]-	C3H6O4	24552	40440	4981.3	16895	21565	17700	11916	14242	24867	23936	14594	26904	15205	13503	9860.9	14775	10313	20983	25706	17422	8740	13805	31510	11727	18568	43485	14367	52312	31334	12370	14920	16834	39965	13679	16145	14759	6538.8	18122	15761	2659.5	39884	50043
MEDN0244	Orotic Acid	CoEnzyme and vitamins	CoEnzyme and vitamins	155.009	156.017	[M-H]-	C5H4N2O4	85151	80780	66635	71987	76427	56945	128390	81183	88260	86290	87843	64486	69224	84667	72256	110790	79375	72334	92814	64876	82072	52768	62086	83586	85137	73443	47787	60310	61173	50137	80701	84277	55147	99524	69093	53614	62800	67375	99759	103690	101520	69543
MEDN0261	3-Indolepropionic Acid	Heterocyclic compounds	Indole and Its derivatives	188.071	189.079	[M-H]-	C11H11NO2	294030	429140	2265700	548280	787520	2287300	150710	1258400	465220	655720	812160	286400	381020	1742000	331050	549240	430720	151500	116350	203970	436910	7785.7	161950	223070	239410	641730	451890	6805.5	1020700	367880	434640	347050	338980	175660	836230	849610	959510	747480	615050	989100	537360	964520
MEDN0266	Indole-3-Carboxaldehyde	Heterocyclic compounds	Indole and Its derivatives	144.045	145.053	[M-H]-	C9H7NO	108710	151840	75482	164150	185210	221500	170300	142220	166780	189790	142600	212950	114760	167710	130960	199130	81827	125930	228310	162050	116270	102100	195510	106900	225090	337660	190220	481790	323290	148810	108830	90140	64542	450390	184630	191710	234570	153000	151250	58549	202710	200470
MEDN0273	1,3-Dimethyluric Acid	Amino acid and Its metabolomics	Amino acid derivatives	195.052	196.06	[M-H]-	C7H8N4O3	423.42	16142	1399.3	3917.1	8064.4	191.1	5811.1	425.33	20998	592.96	7959.9	61741	12125	971.17	9173.9	637.73	199.29	14716	297.84	1065.9	11279	10961	7692.2	292.79	7412.8	27459	1341.3	3396.2	8742.6	10531	806.03	427.79	838.66	2756.6	421.79	10970	7927.5	2695.7	1606.7	842.25	4319.3	2305.7
MEDN0274	1,7-Dimethyluric Acid	Amino acid and Its metabolomics	Amino acid derivatives	195.052	196.06	[M-H]-	C7H8N4O3	423.42	16142	1399.3	3917.1	8064.4	191.1	5811.1	425.33	20998	592.96	7959.9	61741	12125	971.17	9173.9	637.73	199.29	14716	297.84	1065.9	11279	10961	7692.2	292.79	7412.8	27459	1341.3	3396.2	8742.6	10531	806.03	427.79	838.66	2756.6	421.79	10970	7927.5	2695.7	1606.7	842.25	4319.3	2305.7
MEDN0279	2-Aminoethanesulfinic Acid	Organic acid And Its derivatives	Sulfonic acids	108.012	109.02	[M-H]-	C2H7NO2S	44123	68097	33173	32806	32942	35406	25078	25165	13770	25484	42310	51540	22253	21073	23851	28021	55191	30057	22514	9792	13652	29428	17047	18106	18914	51450	16984	29440	32476	27431	39368	15803	35403	17437	33826	31891	37361	22442	10494	25138	42557	27760
MEDN0280	2-Aminoethanesulfonic Acid	Organic acid And Its derivatives	Sulfonic acids	124.007	125.015	[M-H]-	C2H7NO3S	37136000	35914000	35995000	39383000	41784000	38209000	32924000	32770000	37899000	38820000	40071000	35017000	32684000	44059000	30109000	42481000	35220000	28492000	34691000	25345000	26233000	31787000	35611000	21120000	22151000	36260000	41092000	45139000	44006000	31352000	38158000	23190000	45926000	29716000	44246000	41314000	32653000	42173000	25478000	32746000	34283000	46450000
MEDN0283	2-Hydroxybutanoic Acid	Organic acid And Its derivatives	Organic acid And Its derivatives	103.003	104.047	[M-H]-	C4H8O3	3515100	5914700	4693800	2339200	4364300	1417800	3304500	4382200	12292000	3261500	4411100	3514800	3133300	3442800	2059800	3164300	4988600	11716000	2888400	6012800	3450600	3164500	2584100	6986500	3424800	6927000	3195700	5253800	6908900	2297900	9457700	1938800	27221000	3121400	2415100	8222600	3801100	6552100	7666300	936650	9381500	9455100
MEDN0284	2-Hydroxyisocaproic Acid	Organic acid And Its derivatives	Organic acid And Its derivatives	131.071	132.079	[M-H]-	C6H12O3	61483	160180	53998	31294	123270	60800	53735	27465	73237	61189	113100	91239	51181	40418	30426	39598	43007	75489	49993	26471	68818	145680	52393	22195	53127	81822	49878	172750	54155	44247	60669	29058	49799	51091	135870	115430	124520	44305	57073	21951	86693	84116
MEDN0285	2-Methylsuccinic Acid	Organic acid And Its derivatives	Organic acid And Its derivatives	131.034	132.042	[M-H]-	C5H8O4	151550	189760	63381	688740	90324	24761	371470	32521	870120	129440	183220	93291	126310	98910	150280	49269	79809	104390	406020	98614	322670	364190	40438	197260	116340	340630	112100	195620	151390	58023	287180	94480	196390	39139	181590	198790	105620	142970	97624	133920	265840	183920
MEDN0286	3,4,5-Trimethoxycinnamic Acid	Organic acid And Its derivatives	Organic acid And Its derivatives	237.076	238.084	[M-H]-	C12H14O5	3743.1	2839.2	3311.7	17791	10272	6788.9	9478.3	9075.8	39251	1663.8	9767.9	15002	2565.7	11140	6742	11737	19902	4096.1	3919	12988	2062.7	2003.8	4381.2	57287	4713.7	21348	4229.3	2360.9	4650.3	3658.1	1096.9	2068.3	2299.4	418.91	1345.1	4962	7036.7	69464	1778.7	1970.1	13305	1848.9
MEDN0288	3,7-Dimethyluric Acid	Amino acid and Its metabolomics	Amino acid derivatives	195.052	196.06	[M-H]-	C7H8N4O3	423.42	16142	1399.3	3917.1	8064.4	191.1	5811.1	425.33	20998	592.96	7959.9	61741	12125	971.17	9173.9	637.73	199.29	14716	297.84	1065.9	11279	10961	7692.2	292.79	7412.8	27459	1341.3	3396.2	8742.6	10531	806.03	427.79	838.66	2756.6	421.79	10970	7927.5	2695.7	1606.7	842.25	4319.3	2305.7
MEDN0290	3-Hydroxy-3-Methyl Butyric Acid	Organic acid And Its derivatives	Organic acid And Its derivatives	117.055	118.063	[M-H]-	C5H10O3	815210	1091200	644850	381880	924660	965940	521590	781950	854370	988020	725520	1085700	569090	536950	547480	555380	601640	714290	847500	819190	387260	465030	741480	336240	537050	980060	663570	1116500	1237100	678310	1043300	453370	724730	714290	495120	1209000	794690	634730	477250	460040	953810	1051700
MEDN0292	3-Hydroxybutyrate	Organic acid And Its derivatives	Organic acid And Its derivatives	103.003	104.047	[M-H]-	C4H8O3	3515100	5914700	4693800	2339200	4364300	1417800	3304500	4382200	12292000	3261500	4411100	3514800	3133300	3442800	2059800	3164300	4988600	11716000	2888400	6012800	3450600	3164500	2584100	6986500	3424800	6927000	3195700	5253800	6908900	2297900	9457700	1938800	27221000	3121400	2415100	8222600	3801100	6552100	7666300	936650	9381500	9455100
MEDN0293	3-Hydroxypropanoic Acid	Organic acid And Its derivatives	Organic acid And Its derivatives	89.0239	90.032	[M-H]-	C3H6O3	1812100	1544400	1264700	1443800	1761800	1985100	1892900	1125500	1943000	1561300	1404000	1700400	1646000	1544000	1907100	1791600	1668400	1797300	1232300	1348500	1116300	1375900	1069300	900650	1489200	1615200	1665600	2182000	1664400	1754100	1661400	1202500	1286700	1900100	1679200	1595800	1439800	1901700	920520	1690900	1849500	2097000
MEDN0294	3-Methylcrotonyl Glycine	Organic acid And Its derivatives	Organic acid And Its derivatives	156.066	157.074	[M-H]-	C7H11NO3	423780	83451	381460	232660	393070	312890	355690	53996	71965	131470	268150	305090	53318	333310	151970	600030	350640	495150	183500	102010	281770	98612	188660	97570	248330	43456	280170	114540	475430	408260	212760	73718	74078	42837	217410	661580	331340	135640	763520	61205	194880	44029
MEDN0297	4-Hydroxy-2-Oxoglutaric Acid	Organic acid And Its derivatives	Organic acid And Its derivatives	161.009	162.016	[M-H]-	C5H6O6	47636	153470	54208	64263	64633	44663	76532	96143	123390	100750	81772	87984	77205	65580	72924	44041	57990	82928	81145	100050	67567	46964	77706	65299	55562	128390	54244	115160	107630	83480	103320	78028	116390	67240	56674	55566	63630	60056	66960	40866	100930	128040
MEDN0299	Adipic Acid	Organic acid And Its derivatives	Organic acid And Its derivatives	145.05	146.058	[M-H]-	C6H10O4	102090	92718	90834	93086	157390	52256	133850	95510	67689	77185	111640	137790	50220	72891	69018	52983	78271	118580	61242	43125	89688	130020	52609	55698	71530	88336	120810	98733	107460	79963	131130	56043	170600	80293	80286	247440	99534	91491	93596	128200	72159	85609
MEDN0300	Azelaic Acid	Organic acid And Its derivatives	Organic acid And Its derivatives	187.097	188.105	[M-H]-	C9H16O4	1019800	907360	837320	929050	1901900	989360	905200	981470	1392400	1009900	1308500	1251000	987610	1149400	888070	974420	1056800	1215800	1174800	823570	987350	1116300	974900	949820	1286900	1588900	1137100	1094400	1076800	1132300	1027300	871990	964080	769440	1136200	1953200	953420	1339700	1132500	1355200	1955200	2966400
MEDN0301	Caffeic Acid	Organic acid And Its derivatives	Organic acid And Its derivatives	179.034	180.042	[M-H]-	C9H8O4	92340	264120	178920	501790	205520	718140	286250	557910	341160	280090	242860	329170	316930	403710	182600	632340	262490	220020	138880	128000	242640	166920	88930	138990	163140	187550	396550	112020	245780	192150	137570	189690	193630	285800	191090	492460	347210	240390	79897	252600	132040	225350
MEDN0305	Creatine	Organic acid And Its derivatives	Organic acid And Its derivatives	130.062	131.07	[M-H]-	C4H9N3O2	444700	254510	188410	706610	351640	205680	244930	174370	235290	263150	241090	465910	415100	611860	591370	598370	434300	275990	486010	407380	239230	194280	277620	414070	226000	502050	270840	731120	512590	267090	253760	113150	621680	201640	182880	310620	169750	584460	504770	548530	351320	285340
MEDN0311	Dodecanedioic Aicd	FA	FFA	229.144	230.152	[M-H]-	C12H22O4	9731.5	11029	5985.2	8749.9	9683.9	8728.5	7786.2	17133	10239	6827.1	11812	9171.9	5229.3	5707.8	6948	7305.7	9405	7870.6	13013	13480	8619.1	11117	7213.6	10594	9556	13285	10799	7841.5	13570	7429.3	17781	4993.2	43739	8659.9	10504	17292	11316	9654.8	11032	8479.5	12004	16952
MEDN0316	Guanidinoethyl Sulfonate	Organic acid And Its derivatives	Sulfonic acids	166.029	167.037	[M-H]-	C3H9N3O3S	166970	162280	149940	160080	166010	138070	166760	131500	146280	142640	161140	147350	172380	167970	142180	175240	169470	180180	144520	141800	147170	189130	138570	127470	182900	162860	151630	161520	146490	161680	192320	154530	127480	183060	178530	132150	185500	149550	160950	144650	170850	181280
MEDN0320	Hydrocinnamic Acid	Organic acid And Its derivatives	Organic acid And Its derivatives	149.06	150.068	[M-H]-	C9H10O2	9076.4	107490	70122	11585	39732	242290	21015	163840	26869	111600	48964	54050	19568	214510	20707	47446	97626	15334	13352	58966	39919	5568.8	52679	17643	9243.4	23330	209860	12559	197200	64778	7461	44937	49860	32272	39973	124650	95006	202750	22663	58422	9628.7	2494.6
MEDN0322	Kynurenine	Amino acid and Its metabolomics	Amino acid derivatives	207.077	208.085	[M-H]-	C10H12N2O3	380630	520270	348980	443360	361070	370810	585650	349620	509320	602720	397720	551530	256660	416260	439730	334560	321090	461100	555620	307480	256170	185950	291650	214340	313470	623940	404460	438450	543400	409430	369610	158180	765880	427940	478840	481190	565650	263650	253090	203240	404530	359820
MEDN0325	L-Lactic Acid	Organic acid And Its derivatives	Organic acid And Its derivatives	89.0239	90.0317	[M-H]-	C3H6O3	1812100	1544400	1264700	1443800	1761800	1985100	1892900	1125500	1943000	1561300	1404000	1700400	1646000	1544000	1907100	1791600	1668400	1797300	1232300	1348500	1116300	1375900	1069300	900650	1489200	1615200	1665600	2182000	1664400	1754100	1661400	1202500	1286700	1900100	1679200	1595800	1439800	1901700	920520	1690900	1849500	2097000
MEDN0327	L-Dihydroorotic Acid	Organic acid And Its derivatives	Organic acid And Its derivatives	157.025	158.033	[M-H]-	C5H6N2O4	236840	272790	226090	208230	212720	233380	265600	199760	226350	221120	252020	304400	254400	202710	211210	276210	215470	207440	226510	292170	275490	229890	278090	198320	258390	221090	186940	270340	214500	210830	289080	251390	267600	241150	226010	321450	207350	197280	318350	294610	244770	272110
MEDN0328	L-Homoserine	Organic acid And Its derivatives	Organic acid And Its derivatives	118.05	119.058	[M-H]-	C4H9NO3	928980	1197300	625270	841300	989450	730590	1010200	565640	763660	869930	974710	1302600	744590	971700	949290	796580	1120000	1127900	815360	772640	575260	907840	795430	678160	715320	810380	755660	1127700	932490	1267900	889540	731080	1245100	880980	982130	868430	881030	758110	847960	1189200	939480	951720
MEDN0333	Malonicacid	Organic acid And Its derivatives	Organic acid And Its derivatives	103.003	104.011	[M-H]-	C3H4O4	3515100	5914700	4693800	2339200	4364300	1417800	3304500	4382200	12292000	3261500	4411100	3514800	3133300	3442800	2059800	3164300	4988600	11716000	2888400	6012800	3450600	3164500	2584100	6986500	3424800	6927000	3195700	5253800	6908900	2297900	9457700	1938800	27221000	3121400	2415100	8222600	3801100	6552100	7666300	936650	9381500	9455100
MEDN0334	Mandelic Acid	Organic acid And Its derivatives	Organic acid And Its derivatives	151.04	152.047	[M-H]-	C8H8O3	17861	98222	21513	209230	64042	116670	31731	50105	43332	53971	61439	73319	31749	175940	50772	12880	79382	59084	58742	23299	43247	15363	163150	5998.4	20064	150040	27340	155910	69664	69378	26995	12003	46406	33677	97224	127530	44154	395660	15584	21807	25265	77281
MEDN0335	Methylmalonic Acid	Organic acid And Its derivatives	Organic acid And Its derivatives	117.019	118.027	[M-H]-	C4H6O4	4413200	3493400	2824100	3220200	3633400	4000300	4425000	3635700	4854800	4792700	4431100	3273700	3467900	4058300	3577900	3798000	3047500	2238200	4541000	3131900	3111000	3217500	3855500	1374900	3516900	6542000	4234300	5840500	5326100	3489400	4436500	1844400	4327100	3418200	4007000	4420600	3191300	4120600	2352500	2209900	3809000	6128400
MEDN0338	Phenyllactate(Pla)	Organic acid And Its derivatives	Organic acid And Its derivatives	165.055	166.063	[M-H]-	C9H10O3	68741	139160	71129	66032	78467	64586	67129	34208	107230	88413	102190	86178	66237	58240	63122	61889	67762	88796	74196	38509	47283	87240	62079	35261	36897	71669	115490	113790	82883	54727	83388	34282	74955	81434	150460	130730	104990	80630	64790	32375	120130	105230
MEDN0340	Pyrrole-2-Carboxylic Acid	Organic acid And Its derivatives	Organic acid And Its derivatives	110.024	111.032	[M-H]-	C5H5NO2	12860	9729	19629	18074	18289	24025	20315	34041	49025	14382	17397	17249	1641.6	20718	4178.5	11631	10138	24726	7187.2	13849	7448.6	6562	10288	4403.5	17670	12424	15680	7092.8	15234	9000	25763	13793	22457	5370.9	7783.4	24882	9370.3	20554	4312.2	3937.5	11323	22179
MEDN0342	Sebacate	Organic acid And Its derivatives	Organic acid And Its derivatives	201.113	202.121	[M-H]-	C10H18O4	5113.4	2945.1	2029.3	3177.5	4909.6	2559.2	5954.5	2506.8	34930	4176.9	2877.8	4348.3	3558.7	13001	3982.9	2774.7	3817.2	3345.4	3091.7	3556.8	5002	5026.3	850.14	4673.5	5178.8	3358.3	4174	1950.5	7354.2	17471	10969	5001.7	5470.1	2635.5	2754.1	6941.3	5695.5	8179.2	4253.4	7687.9	6627.6	4659.8
MEDN0344	Subericacid	Organic acid And Its derivatives	Organic acid And Its derivatives	173.081	174.089	[M-H]-	C8H14O4	82501	69513	58919	73443	74880	50333	74592	55503	133430	65956	84795	92000	51764	72765	50113	57228	74473	80852	68066	66018	65966	84977	92013	73669	74839	107220	76445	67371	92982	59958	75923	67632	103170	59729	69709	114950	66679	68673	88835	112080	128780	161940
MEDN0348	TXB2	FA	Oxidized lipids	369.228	370.236	[M-H]-	C20H34O6	401600	218010	48459	233310	542150	315740	198930	120810	326560	349720	304520	101690	369930	118580	253520	143780	317480	182550	157750	128830	115550	161230	537370	148890	227670	163500	192910	296910	1053.3	6312.1	87871	126880	779990	89356	395240	1109300	200920	196850	135950	105530	240470	901950
MEDN0350	(±)15-HETE	FA	Oxidized lipids	319.227	320.235	[M-H]-	C20H32O3	109650	87278	29234	66779	98336	90461	97461	47657	171880	57577	94736	55982	104600	70143	86301	119810	143850	46794	42306	23253	32446	36021	78348	28893	35716	73048	33602	121560	78846	80956	66643	39015	106260	33326	136490	138280	43591	121320	17877	59943	71686	204110
MEDN0356	LPS(22:6/0:0)	GP	LPS	568.268	569.275	[M-H]-	C28H44NO9P	43866	30567	27467	34784	29442	34181	17925	28521	61455	33690	29999	41079	28436	35639	32207	21550	20107	20917	54203	21541	22667	20479	30437	9652.4	22673	39611	23951	22720	25618	22607	17400	12218	14422	14054	38382	38850	43127	42940	25351	21642	41272	51750
MEDN0360	LPG(18:1/0:0)	GP	LPG	509.288	510.296	[M-H]-	C24H47O9P	586720	383560	367310	444090	396380	378450	404880	310970	476320	380060	355290	450220	455930	362820	393660	386310	325840	309890	651880	291420	360990	481610	395030	202650	464330	580910	350060	468210	378530	229910	278520	248680	372560	242860	520990	477060	533710	495120	379590	380120	520680	626450
MEDN0362	LPE(18:1/0:0)	GP	LPE	478.293	479.301	[M-H]-	C23H46NO7P	6340000	5277200	1570200	6567100	7549000	5626800	2919600	3850300	9971300	8071800	5499200	13170000	4785100	4177700	2349400	4200000	6345200	4093700	10521000	1539700	10577000	13554000	2517100	1958400	9818500	5972500	3978900	6952400	5350200	2786500	5035700	2704000	3528700	1950900	7631700	8897400	8866600	12501000	21424000	4166300	8109200	9899600
MEDN0364	LPE(18:0/0:0)	GP	LPE	480.309	481.317	[M-H]-	C23H48NO7P	8645200	5043400	4447700	9518100	7895700	7781600	7860200	5130900	10540000	8651500	8168700	9106700	5697300	5864600	5772500	8048200	7845700	4242100	16202000	3641300	8480700	11775000	5949300	2611200	10854000	8000600	4262800	9793900	7607400	3881700	5343200	3210300	5409100	4085200	10706000	9931400	9337900	8922200	24379000	7039700	10518000	15529000
MEDN0366	LPE(16:0/0:0)	GP	LPE	452.278	453.286	[M-H]-	C21H44NO7P	40914000	30044000	20960000	48112000	39394000	34719000	28018000	26320000	56210000	41633000	37380000	55481000	26043000	29699000	25796000	37451000	35365000	18649000	81179000	23633000	63348000	52990000	31588000	17425000	57595000	34160000	18453000	48118000	44450000	17075000	37711000	14190000	36440000	26240000	50067000	44676000	45424000	40300000	116150000	42628000	58917000	87562000
MEDN0368	LPE(14:0/0:0)	GP	LPE	424.246	425.254	[M-H]-	C19H40NO7P	73287	76310	58411	104580	128170	111980	67260	109180	96719	112720	87676	210550	54739	66762	83055	129770	69400	38378	337420	64071	157940	169790	63499	23424	167850	86495	56688	155180	112460	31529	116980	33682	39462	52719	141530	135910	84952	62094	227510	103320	105750	233710
MEDN0370	LPA(0:0/18:0)	GP	LPC	437.267	438.275	[M-H]-	C21H43O7P	871810	476130	412610	680640	487520	513980	561190	479580	769590	549090	533200	647490	590760	551750	525760	648220	437470	457380	1636200	362880	506250	721930	530510	256630	766920	1006800	499940	804140	532780	289240	388470	290830	590760	251480	760600	698570	850380	793490	595590	496390	844250	1151200
MEDN0372	LPA(0:0/16:0)	GP	LPA	409.236	410.243	[M-H]-	C19H39O7P	1936700	1945600	1462300	1854800	2206600	1737000	1965800	1656500	2845600	2232700	2056100	2220900	2156500	1789500	1619500	1612600	1680900	1314400	4931400	1817000	2019100	2689600	1811000	1004700	2474600	3228200	1656100	2944400	2431500	1131900	1719900	978650	1933900	1070900	2253500	2302800	2538000	2751400	1680800	1724300	2904500	3840200
MEDN0375	13-HOTrE	FA	Oxidized lipids	293.212	294.1	[M-H]-	C18H30O3	70992	58517	53748	46474	65960	66651	49438	34985	90711	29024	43306	42286	37619	54624	36535	63714	83807	69670	45459	28566	36460	43394	38457	31134	39307	36657	38730	51482	57000	36289	61792	35098	78958	28379	63622	79735	42851	56870	50704	47396	53659	82397
MEDN0376	9,10-DiHOME	FA	Oxidized lipids	313.238	314.246	[M-H]-	C18H34O4	154150	98932	130140	345710	218290	81333	172190	191110	212660	113490	149590	188500	180550	250660	121880	71913	561250	245550	153840	218640	121620	155600	75966	97499	2193500	222780	162690	203410	134250	122610	168770	95061	810450	180900	240190	229850	253960	491430	169170	265830	202080	268060
MEDN0380	FFA(16:1)	FA	FFA	253.217	254.2	[M-H]-	C16H30O2	51590000	34863000	49585000	26939000	27585000	30837000	30176000	29011000	55432000	32906000	51111000	75300000	33740000	41565000	36961000	38286000	21932000	36484000	38499000	33863000	30179000	133220000	35669000	30337000	136220000	99597000	29555000	91035000	59833000	47127000	113090000	31851000	132040000	47549000	80639000	60265000	58230000	34321000	52636000	26067000	74402000	149110000
MEDN0381	FFA(16:0)	FA	FFA	255.232	256.24	[M-H]-	C16H32O2	8900200	8123200	9706900	11385000	10802000	10213000	11645000	10561000	13423000	11677000	15641000	14650000	11833000	10932000	12348000	12007000	10303000	11670000	12755000	12692000	12856000	13598000	12890000	10088000	16844000	18381000	12821000	17912000	15059000	12743000	20288000	13433000	21210000	13439000	17090000	16038000	15943000	15620000	13924000	12907000	16134000	22091000
MEDN0383	FFA(18:2)	FA	FFA	279.232	280.24	[M-H]-	C18H32O2	13591000	11940000	12148000	14980000	12812000	14683000	20029000	13928000	19946000	13599000	18167000	20531000	15730000	14753000	13788000	14280000	13598000	14067000	18069000	13764000	12108000	22568000	14359000	11907000	26442000	23810000	17891000	24300000	21009000	16566000	24263000	16733000	26979000	15280000	21453000	21789000	19586000	20030000	18084000	11327000	22627000	37426000
MEDN0385	FFA(12:0)	FA	FFA	199.17	200.17	[M-H]-	C12H24O2	631260	699280	833630	548830	402020	467450	549370	1178100	1764200	417040	577910	711420	413590	628550	447090	712610	622560	493920	692620	678250	568580	1465600	601100	1004000	1064300	1036100	489150	1027400	765060	401990	1245800	331600	2790900	456920	675130	839810	602450	463380	976500	925850	660340	2233900
MEDN0390	EPA	FA	Oxidized lipids	301.217	302.22	[M-H]-	C20H30O2	4605600	1508500	3330400	1863500	3832600	3889900	1532200	1750600	1884600	1956000	3016200	4980900	1476800	5508300	1705000	7345700	2524100	2374300	3786200	1397200	4006700	5942100	1477600	942700	2873300	2379000	2678100	3970500	6135600	1982300	5847800	744150	2606700	1420500	3841500	9042100	3141000	1072500	3348800	1184400	2878400	4532400
MEDN0391	DHA	FA	Oxidized lipids	327.232	328.24	[M-H]-	C22H32O2	3419100	1856000	3829100	2926700	2308300	2565200	2583200	2576400	5971700	2535100	2873100	4422200	2485900	5233800	1861200	3319100	1794300	4100100	4402500	3026700	1928900	5078200	2608600	2264500	3963600	6762100	1953600	5302900	3826400	2388600	6262400	1940700	6483000	2433600	2819500	3696400	3386100	2161300	2573500	1212200	4763600	9192100
MEDN0394	FFA(20:2)	FA	FFA	307.264	308.27	[M-H]-	C20H36O2	4992.4	5594.3	6461.6	6096.8	6444.8	7384.1	5936.1	5469.7	11058	5943.9	10510	8789.2	5990.5	6426.2	6778	6897.1	5142.4	6995.1	8004.7	4938.2	4015.1	12448	4817.1	3554.9	11618	13155	4642.5	11868	7249	4585.2	13378	4495.1	16571	5735.9	8002.7	7651.2	10503	6103.3	6491.4	3972.8	7333.2	19985
MEDN0396	FFA(10:0)	FA	FFA	171.139	172.15	[M-H]-	C10H20O2	3366.7	4136.7	7547.7	3760.4	2904.5	2393.2	4421.9	3214	9252.2	2762.2	6270.3	4032.3	3222.9	5667.3	4021.6	3790.7	3322.5	5080.9	5120.9	5190.2	2405.2	5131.8	3814.5	6394.7	4655.2	6895.2	3398.4	14517	5147.3	2659.4	9047.9	2766.2	15102	1963.7	7033.7	5723.8	5662.7	6338.5	7851.3	3920	5131.3	10567
MEDN0398	AA	FA	Oxidized lipids	303.232	304.24	[M-H]-	C20H32O2	1986700	1343500	1333800	1912300	1694500	1792000	1543000	1585800	2284800	2056200	2203100	1962000	1960900	1366000	1567900	2161400	1640800	1400900	1864400	1632700	1254300	1969900	1878100	1216100	2295800	3659100	2104400	3102900	2916400	2026300	2828100	1301200	3404900	1750400	2292600	3242900	2383400	1657600	1570200	1082700	2729400	4494600
MEDN0415	2-(Formylamino)Benzoic Acid	Benzene and substituted derivatives	Phenolic acids	164.035	165.043	[M-H]-	C8H7NO3	208710	901350	311810	1179500	968810	416810	463110	833020	1473400	1015000	386610	1635700	558740	763260	548280	554530	693340	569320	373040	797670	911260	495510	1158500	368910	437960	781280	589870	665780	962610	1338100	442040	295460	1040600	492950	443360	927730	874660	1250400	349040	313030	228740	1582300
MEDN0416	Ureidoisobutyric Acid	Organic acid And Its derivatives	Organic acid And Its derivatives	145.061	146.069	[M-H]-	C5H10N2O3	10796	24525	7722.6	9889.8	13233	15960	11454	13249	4082.9	9931.3	22224	13632	12291	16746	13606	23038	4866.3	14221	7589.1	7782.6	3746.5	17521	10506	3506.7	16512	52943	2719.1	12183	11093	11683	15388	3875.8	14416	29238	15454	6441.1	6609.9	9710.1	9655.1	6221.1	11300	18058
MEDN0419	Uridine 5-Monophosphate	Nucleotide And Its metabolomics	Nucleotide and Its metabolomics	323.028	324.036	[M-H]-	C9H13N2O9P	27985	19983	34582	22092	22937	31907	28705	18945	47822	34393	38956	47902	35942	16379	22974	33709	16940	34716	20220	24284	26556	27423	12255	30226	15461	13284	30129	43552	32444	37557	33188	13784	46361	33883	31842	39004	50026	37235	18528	24539	36086	47752
MEDN0428	N6-Succinyl Adenosine	Nucleotide And Its metabolomics	Nucleotide and Its metabolomics	382.1	383.108	[M-H]-	C14H17N5O8	5061.9	7676.8	6647.4	9362.8	8267.9	11081	14533	5279.7	9820	17306	10744	7864.2	6195.1	3892.6	7478.1	5929.2	7043.5	6045.2	6925.9	5178.9	4697.3	8260.5	7207.9	4003	4379.9	8670.3	7612.2	13783	11287	8722.9	10038	6347.3	5885.3	16097	19007	9298.7	7702.9	15286	11198	6098.7	9538.4	14698
MEDN0429	3-Hydroxyhippuric Acid	Amino acid and Its metabolomics	Amino acid derivatives	194.045	195.053	[M-H]-	C9H9NO4	136530	37913	21286	266110	67528	59044	81312	40263	34507	20217	313190	67348	101870	54731	50780	36322	35006	65741	190870	24290	25529	32847	10174	23986	25643	177240	22385	22117	24931	18295	23266	20315	43506	18163	82823	25181	43784	275010	40913	19909	36860	143860
MEDN0431	2-(Dimethylamino)Guanosine	Nucleotide And Its metabolomics	Nucleotide and Its metabolomics	310.115	311.123	[M-H]-	C12H17N5O5	83934	86728	82441	87160	72577	75544	124580	62167	109320	86120	107070	108850	56652	85858	68821	67230	69754	81730	88560	55972	45040	70969	57839	46926	65967	90655	69521	103260	121020	74618	91813	41456	72470	74392	96811	96688	93190	72513	65501	60734	99507	98614
MEDN0432	5-Hydroxyhexanoic Acid	Organic acid And Its derivatives	Organic acid And Its derivatives	131.071	132.079	[M-H]-	C6H12O3	28389	41398	65952	21831	31482	42170	159330	20539	971090	12162	31537	32712	98529	3470.4	968350	809080	556150	6521.5	62608	5979.3	27324	17593	21311	22041	36032	29951	21082	52115	16895	17860	55224	5920.8	191760	20737	56823	61286	34149	15676	68486	120580	23976	23003
MEDN0434	Β-Pseudouridine	Nucleotide And Its metabolomics	Nucleotide and Its metabolomics	243.062	244.07	[M-H]-	C9H12N2O6	1282000	1572100	1222500	1301400	1305000	1382400	1572700	1218200	1457300	1516500	1480100	1460800	1094800	1597700	1161700	1308400	1482100	1284400	1246300	1189400	1090600	1083400	1182400	942800	1243800	1303100	1140300	1476700	1745000	1418600	1468600	877210	1534700	1176500	1624000	1943700	1857300	1337300	1308800	1171400	1891700	1918300
MEDN0439	N-Acetylthreonine	Amino acid and Its metabolomics	Amino acid derivatives	160.061	161.069	[M-H]-	C6H11NO4	55438	150650	27550	40851	36956	26450	49925	43301	36332	41916	37573	56455	47645	49818	35299	47019	47278	38919	33869	47554	22278	35302	42146	37015	26616	41727	38223	66083	65194	45120	49490	23026	42023	43793	55951	57682	48288	39337	36867	30973	51345	44893
MEDN0452	2'-Deoxycytidine-5'-Monophosphate	Nucleotide And Its metabolomics	Nucleotide and Its metabolomics	306.049	307.057	[M-H]-	C9H14N3O7P	73478	104220	56973	66047	80581	95672	97741	84081	113160	88601	89721	90098	63769	98355	80363	70880	126210	86250	62770	101360	59826	47204	48638	35665	50265	131850	76741	84060	122680	87906	89236	44760	67948	91780	89317	109410	100410	69988	75059	74978	80557	88739
MEDN0460	N8-Acetylspermidine	Amino acid and Its metabolomics	Amino acid derivatives	188.176	189.184	[M-H]-	C9H23N3O	16418	23911	23802	26606	21888	19943	23903	29019	26056	31747	22745	30182	20956	23032	24484	35568	34252	30511	25371	29118	23072	25953	24591	29788	27966	27074	24123	25852	24353	26379	27137	31983	23537	24966	28746	25854	29306	31638	27449	29085	24453	29850
MEDN0461	D-Sedoheptuiose 7-Phosphate	Carboxylic acids and derivatives	Phosphate sugars	287.017	425.93	[M-Ba]-	C7H13BaO10P	104850	97602	69624	77334	121060	110700	65797	50715	90420	72648	102360	94043	39481	104800	75177	72228	105660	76027	36586	56757	33562	23592	36108	14148	19831	66144	51782	134370	121760	68133	94837	18031	119720	76660	122960	102850	74880	78289	52776	43084	50413	116410
MEDN0463	D-Fructose 6-Phosphate-Disodium Salt	Carboxylic acids and derivatives	Phosphate sugars	259	304.1	[M-2Na+H]-	C6H11Na2O9P	12006	24563	30028	19046	23122	17993	12034	11856	22023	23469	12623	30686	14191	18350	24472	37059	14556	12921	24012	9823.6	18920	20007	15840	15843	14470	29531	30720	20482	23272	4644.6	16097	21737	14463	4645.6	27544	29852	23876	25820	23596	26205	31205	31674
MEDN0478	Aminomalonic Acid	Organic acid And Its derivatives	Organic acid And Its derivatives	118.014	119.022	[M-H]-	C3H5NO4	173050	142570	130710	118460	104190	134410	160530	100270	156630	141710	149100	128530	108190	130060	130110	119630	80877	88976	168700	99716	91588	102770	159840	46891	132000	236100	139550	184810	165260	96415	153360	59330	152100	127640	149570	143410	98943	156360	92345	86343	145820	198130
MEDN0483	3-Methyl-2-Oxobutanoic Acid	Organic acid And Its derivatives	Organic acid And Its derivatives	115.04	116.047	[M-H]-	C5H8O3	17214	23661	17357	13672	20522	23834	16693	16540	34201	25289	22367	18237	13586	17267	17592	20147	16275	20813	25036	16069	18444	12768	23431	21132	17858	24914	16229	34351	18615	21584	16876	9190.6	30115	8487	29403	15782	17889	17084	16836	11468	20999	33018
MEDN0494	8,15-Dihete	FA	FFA	335.222	336.23	[M-H]-	C20H32O4	731710	508740	746110	332930	480250	408410	320210	418060	697910	262340	679430	848280	372630	564990	413360	506620	185410	367790	560060	316740	369740	1476600	524140	327680	1913100	1352900	380500	1155600	588680	409510	1379300	397450	2251000	542070	1104500	741580	625640	512190	469590	280510	860490	1559400
MEDN0496	N-Acetylmethionine	Amino acid and Its metabolomics	Amino acid derivatives	190.054	191.062	[M-H]-	C7H13NO3S	21137	440470	27263	24991	21385	31442	11447	13185	37404	8443.3	11996	16025	20292	25909	15035	19319	38630	14204	4012.1	11214	5037	4414.4	8260.7	11552	3423.8	1747.2	14334	10055	11797	16524	12632	10702	25448	4387.7	30087	25668	12147	30166	7133.1	12563	18193	9183.2
MEDN0498	Ribulose-5-Phosphate	Carboxylic acids and derivatives	Phosphate sugars	229.011	230.019	[M-H]-	C5H11O8P	138640	116760	148580	144790	135100	146200	120760	137510	160520	116710	108780	169150	142330	131720	148070	125800	189420	105810	210510	175290	135270	138730	132980	154360	156640	219800	137820	152350	127610	187730	143250	179730	111940	127170	137480	126530	181890	184630	201670	187880	167860	163100
MEDN0499	Argininosuccinic acid	Organic acid And Its derivatives	Organic acid And Its derivatives	289.115	290.123	[M-H]-	C10H18N4O6	40800	29531	13185	26921	36037	40921	35586	9780.4	40566	27182	31585	32928	20391	44342	26761	28026	33622	22240	14124	25030	8911	7927	12742	6905.5	4917.8	28252	15409	45965	42418	20207	29624	6297.9	40040	26915	48143	40023	26778	24980	15331	18801	27334	48448
MEDN0502	2-Deoxyribose 1-Phosphate	Carboxylic acids and derivatives	Phosphate sugars	213.016	214.024	[M-H]-	C5H11O7P	205040	327160	368920	330800	381860	331780	230300	273860	353120	307940	375290	398040	279470	249300	267470	222400	383860	260730	348540	208070	252680	202350	295040	109020	127700	292400	238460	320820	401300	199840	263750	101700	438400	198480	355190	351110	406270	369160	250930	196230	342250	347740
MEDN0506	N-Acetylglucosamine 1-Phosphate	Carboxylic acids and derivatives	Phosphate sugars	300.048	301.056	[M-H]-	C8H16NO9P	176490	269530	228740	198800	238220	162210	193440	146630	213260	193900	234890	238440	136510	246790	123300	146230	250910	173480	179280	94498	93911	104190	148940	64790	116170	290470	178900	327310	396340	162760	191130	61602	239480	186590	292150	259530	261900	206680	93911	104960	235070	301180
MEDN0533	Xanthosine	Nucleotide And Its metabolomics	Nucleotide and Its metabolomics	283.068	284.076	[M-H]-	C10H12N4O6	886070	1347900	295140	510850	766400	595960	865130	211330	600860	329630	728840	687140	287560	775510	441100	387240	696660	565090	223990	608280	184220	367950	281560	133200	280850	706740	269250	1192200	1194100	577560	591400	282690	512660	734410	832690	411830	389200	233840	1037200	268730	224740	939780
MEDN0554	2-(4-Hydroxyphenyl)ethanol	Benzene and substituted derivatives	Benzene and substituted derivatives	137.06	138.068	[M-H]-	C8H10O2	514760	583420	467250	700930	606080	517190	568340	549460	935980	626910	702050	1272200	501840	607880	554030	546250	483610	637340	704240	573980	691940	460330	487430	496590	461000	685740	485880	492230	1054100	638480	529260	525540	591390	487890	590400	640750	473040	554030	451600	485670	483470	540220
MEDN0555	Hydroxyphenyllactic acid	Organic acid And Its derivatives	Organic acid And Its derivatives	181.05	182.058	[M-H]-	C9H10O4	19760	48432	8023.8	19150	30281	22388	19379	9120	29494	35320	34836	26039	21516	19742	21121	14581	21614	28137	27882	8984.8	7035.9	17444	22269	13635	12258	52345	32884	51074	45178	16994	28204	11302	17241	29402	48745	41957	34939	30544	28912	11682	46712	46417
MEDN0568	2-Methylguanosine	Nucleotide And Its metabolomics	Nucleotide and Its metabolomics	296.1	297.107	[M-H]-	C11H15N5O5	67643	104260	70684	94852	61048	73120	70520	48350	89790	84496	77922	77178	45134	68172	57246	39821	85002	83107	56057	62703	43739	35619	59332	41006	45255	83437	53525	93786	103880	61887	67999	30692	79718	67772	82065	77409	60799	61225	48599	52350	56572	82830
MEDN0570	L-Erythrulose	Carboxylic acids and derivatives	Sugars	119.034	120.042	[M-H]-	C4H8O4	19646	37310	115380	24354	9026.7	18568	20409	18255	28716	33762	16637	29921	18415	27672	15234	23050	17138	27333	33298	25500	9883.7	17065	22536	5672.2	7538.7	33950	17222	15930	34193	26759	32259	14514	7505.3	22585	23470	31487	28311	20564	15979	16457	15023	36958
MEDN0579	N-lactoyl-phenylalanine	Amino acid and Its metabolomics	Amino acid derivatives	236.092	237.1	[M-H]-	C12H15NO4	282110	531990	151660	284420	356880	257900	458700	137220	537030	300700	384240	396650	257800	326060	321740	317120	327520	181160	327900	101510	199630	187860	187500	63793	223930	420900	224720	514510	344670	258280	341030	156050	234610	322770	519130	308500	259070	487260	151610	220050	378450	729010
MEDN0586	N-Acetyl-L-alanine	Amino acid and Its metabolomics	Amino acid derivatives	130.05	131.058	[M-H]-	C5H9NO3	1542200	6142200	1363200	1667700	1738900	1589100	1670100	1310100	1908200	1573600	1650500	1805400	1335500	1591700	1337100	1563200	1503200	1337100	1287100	1070300	918890	1037400	1193100	796900	1006000	1324100	1155800	1754900	1923700	1363200	1591600	737090	1581400	1203100	1981900	1718300	1598200	1289600	1058600	995390	1590100	1881300
MEDN0588	Glycerophosphoric acid	Organic acid And Its derivatives	Phosphoric acids	171.006	172.014	[M-H]-	C3H9O6P	131190	100730	109930	101170	100480	156230	64739	77737	276640	144100	108840	281300	159200	133750	101600	99275	143730	163120	182870	152900	133280	181150	67986	137670	212810	219210	169420	153350	115990	104820	102910	115520	90372	120290	138800	204050	194630	210970	56349	248040	261680	137380
MEDN0593	D-Malic acid	Organic acid And Its derivatives	Organic acid And Its derivatives	133.014	134.022	[M-H]-	C4H6O5	13923	22441	13757	6550.3	16690	13493	11725	15405	9153.5	15482	10682	22455	7195.3	2735.4	6621.5	14571	13230	18034	11452	5796.8	10548	11792	20317	14401	8259.5	19609	17688	9434.6	21586	2658.9	12266	5125.7	24902	16759	13897	10579	34223	19661	17691	9460.2	20414	14701
MEDN0604	Tetradecanedioic acid	FA	FFA	257.175	258.183	[M-H]-	C14H26O4	328750	385350	307020	224600	394910	192390	257810	436650	260610	201730	548530	353700	292910	239570	234070	329720	390440	301320	327010	413620	332410	591750	279990	245030	397700	513820	328810	861910	511760	174110	807970	213110	1731900	398940	318860	863110	355280	250920	509030	230830	553720	995670
MEDN0616	O-Acetyl-L-serine	Amino acid and Its metabolomics	Amino acid derivatives	146.045	147.053	[M-H]-	C5H9NO4	71587	57713	53118	55763	42438	35372	68063	49071	63666	77282	44036	58468	44897	51255	36917	55355	50978	78912	61955	48597	79911	69034	66610	72862	62268	73351	70853	72995	58221	69701	59126	43840	44905	71708	75620	58295	63345	55726	66895	47750	58759	68541
MEDN0621	Indoxylsulfuric acid	Heterocyclic compounds	Indole and Its derivatives	212.002	213.01	[M-H]-	C8H7NO4S	2145.7	8997	2581	14703	16774	5608.9	11609	4317.8	22082	21055	6030.3	19485	13281	11214	7967.7	3234.2	8243	4703.8	6134.3	9216.9	12904	3348.8	14635	2683.9	1838.5	8337.9	6000.9	6635	11168	11442	3616.1	2587.3	10065	2608.3	3776.2	11687	3144.6	14418	1328.6	2685.7	3104.3	18987
MEDN0622	Porphobilinogen	Organic acid And Its derivatives	Organic acid And Its derivatives	225.088	226.095	[M-H]-	C10H14N2O4	4369100	4306500	4653700	4317300	5240700	4382800	4772500	4968600	5054300	3640400	4322000	4434000	4824000	4080300	4345000	5158600	4068400	3746500	4393300	4609800	4495300	4561800	4837200	4966700	3186200	4085500	4049800	4229100	3607300	4077100	4685300	4306300	3411800	3538800	4209000	4452800	4245600	3918400	5270600	5243800	3639100	4160800
MEDN0651	Succinic anhydride	Organic acid And Its derivatives	Organic acid And Its derivatives	99.0082	100.016	[M-H]-	C4H4O3	4432100	4662300	2273200	5119700	2694000	1934100	1592700	4164000	2273100	5675100	3659600	4347500	2189000	4635000	2444400	2537900	5301900	3809700	4383000	4549100	3994300	2886500	3999600	6082400	3538000	5234400	3994300	4012200	3729700	4416600	3960300	7707500	2902200	2998300	4050000	4496500	3167000	6042700	4132500	3787900	2152000	2072700
MEDN0657	D-Xylulose 5-phosphate	Carboxylic acids and derivatives	Phosphate sugars	229.011	230.019	[M-H]-	C5H11O8P	138640	116760	148580	144790	135100	146200	120760	137510	160520	116710	108780	169150	142330	131720	148070	125800	189420	105810	210510	175290	135270	138730	132980	154360	156640	219800	137820	152350	127610	187730	143250	179730	111940	127170	137480	126530	181890	184630	201670	187880	167860	163100
MEDN0658	Hexadecanedioic acid	FA	FFA	285.207	286.214	[M-H]-	C16H30O4	488760	741900	628140	290290	652400	226500	388160	555690	490630	264870	866910	428700	475840	360820	331190	376020	1977700	801880	397790	576100	452890	885800	444090	238160	596860	808840	504360	1264000	788630	255650	1147200	252850	2583500	815150	417690	1037300	583360	519650	714450	214960	1030300	1978900
MEDN0661	2-hydroxy-2-(4-hydroxy-3-methoxyphenyl)acetic acid	Benzene and substituted derivatives	Phenolic acids	197.045	198.053	[M-H]-	C9H10O5	75149	58141	56973	47832	74798	57117	84724	49373	75840	67651	75014	90804	62865	60581	47371	57731	57024	60120	62580	66763	58753	68967	56651	43431	54886	67983	66466	63791	104640	71155	66281	56761	65027	58197	84527	128350	99570	71327	47570	44777	59638	69338
MEDN0682	Octadecanamide	Alcohol and amines	Amines	282.28	283.288	[M-H]-	C18H37NO	150910	63785	64715	64954	72675	59921	71720	92111	75947	65510	88415	66643	64011	71717	60503	61767	70763	72652	72161	68070	71684	71358	72659	67213	63889	236220	62169	73966	62806	87799	55581	71219	76708	81432	76892	101960	94786	144550	84152	85532	65399	76787
MEDN0685	Undecanedioic acid	FA	FFA	215.128	216.136	[M-H]-	C11H20O4	1162100	3120800	35367	527760	65349	85768	219370	29283	57538	1619100	4901800	373040	82579	75260	1047400	29307	91612	1539100	392590	40804	2054100	701600	3589600	31488	792040	485270	878900	1530200	85608	3727400	3229000	76168	9014.9	27935	77997	6541000	1123200	403930	77151	37870	38179	78741
MEDN0689	2,5-Furandicarboxylicacid	Organic acid And Its derivatives	Organic acid And Its derivatives	154.998	156.006	[M-H]-	C6H4O5	1648300	1456900	1616600	1501300	1520300	1801700	1797600	1883100	1740400	1656400	1670000	1595900	1489300	1568400	1543300	1451100	1499300	1641800	1903100	1724400	1630500	1606100	1573000	1602600	1606400	1410600	1297300	1163200	1480100	1193900	1651900	1559800	1583000	1316500	1594000	1701100	1216700	1615000	1663800	1600300	1555000	1469300
MEDN0691	Maltitol	Carboxylic acids and derivatives	Sugar alcohols	343.124	344.132	[M-H]-	C12H24O11	8224	9324.4	19328	14408	13265	10571	9781	16483	5553.9	17749	7086.1	10067	19635	11482	2725.5	9791.5	4469.9	10669	12740	8757.8	19836	14247	22730	17587	13059	9807.7	15943	16475	9319.9	13155	14541	9258	13857	9850	15879	22495	18153	9433.2	19946	11998	18252	16335
MEDN0704	Oxaloacetic acid	Organic acid And Its derivatives	Organic acid And Its derivatives	130.998	132.07	[M-H]-	C4H4O5	17471	21872	14716	18447	18259	11570	21428	18106	15778	25895	26015	21173	16332	30129	17160	21562	20257	26664	21212	12492	13595	13317	24899	24305	27687	22520	10303	13937	16336	13600	23073	7581.2	27651	8746.6	13441	30485	23367	17373	26060	28674	24922	24304
MEDN0720	N-(2-Methylbenzoyl)glycine	Amino acid and Its metabolomics	Amino acid derivatives	192.066	193.074	[M-H]-	C10H11NO3	10567	7027.3	4166.7	3721.7	4198.6	4139.9	5351.4	2745.4	4266.4	3994.5	6291.3	3997.5	2329.8	5503.9	2179.4	6408	1555	3382.2	3809.5	4435.9	2746	5066.8	3246.3	2460.6	4662.7	9973.3	4963.1	7634	5607.7	4108.7	4094.9	3211.2	4532.9	5283.6	4626.8	5915.4	4055.9	3192.5	5423.5	4255	4616.1	5955.9
MEDN0729	Phenoxyacetic acid	Benzene and substituted derivatives	Phenolic acids	151.04	152.047	[M-H]-	C8H8O3	50312	359020	208260	25858000	91522	1355300	63276	9518400	5898100	100490	16300	14278	387490	1208700	285880	8791900	288660	105860	3267000	4320900	55008	24387	42882	37607	980720	3137400	353110	351860	52908	25404	521160	32387	320080	34593	41868	708620	14326	3450000	810440	1225400	23101	23717
MEDN0739	4-Hydroxybenzyl alcohol	Benzene and substituted derivatives	Benzene and substituted derivatives	123.045	124.052	[M-H]-	C7H8O2	64046	134500	54200	59570	75621	69768	62903	30975	71485	57898	82130	66482	49486	51685	48507	54893	55156	67589	86054	35165	38634	51001	70506	41157	44073	97151	109180	97544	72357	44625	74298	34315	56328	77611	95736	91302	61124	51676	60838	37291	82142	97561
MEDN0741	Methanesulfonic acid	Organic acid And Its derivatives	Sulfonic acids	94.9803	95.9881	[M-H]-	CH4O3S	200530	153580	134070	89269	138910	126210	93265	169520	98289	171460	72013	125180	132740	65100	78776	75801	101360	173460	87965	50061	119570	45186	65759	154740	62562	110170	99081	92746	108130	116610	54337	49403	82698	33244	81082	282740	76442	140000	89827	25846	351220	78814
MEDN0750	(±)12-HEPE	FA	Oxidized lipids	317.212	318.219	[M-H]-	C20H30O3	377050	181390	84772	173870	497680	290250	194910	109610	500350	99715	281330	358180	250390	621210	255880	766890	912800	166790	197680	37835	154170	233440	117310	47781	88853	65679	71015	369720	325410	177010	234970	50174	208860	43585	475560	573940	90061	284830	104280	152080	226170	495270
MEDN0751	(±)12-HETE	FA	Oxidized lipids	319.227	320.235	[M-H]-	C20H32O3	6904000	6451300	1811200	4832500	7062500	5897700	9335900	3831800	13396000	4224600	6602400	4264000	9156600	6633300	6010000	8893200	13418000	2571400	2418500	1122300	1895500	2386800	5879600	1955400	3201400	4162100	2140200	8466700	5293600	5977800	4826000	3032900	7971600	1697200	8725700	6044000	2746900	11193000	1193900	5213500	4961200	14920000
MEDN0752	(±)15-HEPE	FA	Oxidized lipids	317.212	318.219	[M-H]-	C20H30O3	377050	181390	84772	173870	497680	290250	194910	109610	500350	99715	281330	358180	250390	621210	255880	766890	912800	166790	197680	37835	154170	233440	117310	47781	88853	65679	71015	369720	325410	177010	234970	50174	208860	43585	475560	573940	90061	284830	104280	152080	226170	495270
MEDN0753	(±)16-HETE	FA	Oxidized lipids	319.227	320.235	[M-H]-	C20H32O3	2161	1016.4	2231.8	1677.6	2223.3	2984.2	1786.8	1830.2	1958.5	1364.4	3458.7	1887	1699.5	2334.2	2022.5	1757.5	3718.6	3754.3	1728.1	1820.9	1359.6	5065.5	2323.3	1668.3	1274.7	2468.8	1427.3	3753.9	3040.2	3389.5	10986	1498.4	4494.6	785.29	3867.9	8382.8	2396.7	776.68	1929.5	1633	1619.6	2800
MEDN0755	(±)17-HETE	FA	Oxidized lipids	319.227	320.235	[M-H]-	C20H32O3	2161	1016.4	2231.8	1677.6	2223.3	2984.2	1786.8	1830.2	1958.5	1364.4	3458.7	1887	1699.5	2334.2	2022.5	1757.5	3718.6	3754.3	1728.1	1820.9	1359.6	5065.5	2323.3	1668.3	1274.7	2468.8	1427.3	3753.9	3040.2	3389.5	10986	1498.4	4494.6	785.29	3867.9	8382.8	2396.7	776.68	1929.5	1633	1619.6	2800
MEDN0756	(±)18-HEPE	FA	Oxidized lipids	317.212	318.219	[M-H]-	C20H30O3	377050	181390	84772	173870	497680	290250	194910	109610	500350	99715	281330	358180	250390	621210	255880	766890	912800	166790	197680	37835	154170	233440	117310	47781	88853	65679	71015	369720	325410	177010	234970	50174	208860	43585	475560	573940	90061	284830	104280	152080	226170	495270
MEDN0757	(±)18-HETE	FA	Oxidized lipids	319.227	320.235	[M-H]-	C20H32O3	2161	1016.4	2231.8	1677.6	2223.3	2984.2	1786.8	1830.2	1958.5	1364.4	3458.7	1887	1699.5	2334.2	2022.5	1757.5	3718.6	3754.3	1728.1	1820.9	1359.6	5065.5	2323.3	1668.3	1274.7	2468.8	1427.3	3753.9	3040.2	3389.5	10986	1498.4	4494.6	785.29	3867.9	8382.8	2396.7	776.68	1929.5	1633	1619.6	2800
MEDN0758	(±)4-HDHA	FA	Oxidized lipids	343.227	344.235	[M-H]-	C22H32O3	5258.4	4286.4	2758.4	4863.6	4438.1	3660.5	2974.5	4373.3	6904.5	4213.6	2963.4	7441.1	4823	6050.6	4374.9	3576.1	1503	5538.7	10272	7802.2	3179.2	7258.3	5080.2	3765.2	6139.2	12617	4215.2	5568.9	12044	4546.2	5248.6	2950.1	7821.9	3940.5	6246.1	6146.6	5194.9	3265.1	4185.3	2948.8	4900.9	9540.3
MEDN0759	(±)5-HEPE	FA	Oxidized lipids	317.212	318.219	[M-H]-	C20H30O3	5752.6	3278.6	3708.1	3112.7	5378.5	5982.8	4547.6	2262.4	4124.8	2551	6769.3	8643.2	2768.1	5281.3	3937.4	10125	3355.8	3877.9	8747.4	1296.5	7562.8	13079	1739.7	1895.8	5794.6	4106.2	2542.3	7367.4	16104	4256.9	7420.7	1744.5	3733.4	2513.2	5738.8	10038	5205	2097.2	6541.5	1801.2	4183.9	10708
MEDN0760	(±)5-HETE	FA	Oxidized lipids	319.227	320.235	[M-H]-	C20H32O3	78888	49547	26686	30304	60111	36974	37943	38057	56600	57517	111660	58907	29117	37662	33134	31197	36163	31641	38984	45465	28634	95846	21610	24401	63502	146080	33760	66319	263870	95219	40214	23408	51373	44114	56206	58241	72962	34230	46049	27461	51402	98530
MEDN0763	(±)9-HETE	FA	Oxidized lipids	319.227	320.235	[M-H]-	C20H32O3	78888	49547	26686	30304	60111	36974	37943	38057	56600	57517	111660	58907	29117	37662	33134	31197	36163	31641	38984	45465	28634	95846	21610	24401	63502	146080	33760	66319	263870	95219	40214	23408	51373	44114	56206	58241	72962	34230	46049	27461	51402	98530
MEDN0765	11,12-EET	FA	Oxidized lipids	319.227	320.235	[M-H]-	C20H32O3	110460	81345	20106	64469	121350	76949	94014	43108	139530	78088	89436	43035	101620	59120	79075	79104	127770	39067	39633	32609	27065	40660	92142	34516	53126	64489	47845	105740	47621	36732	51426	31206	149690	36634	127330	186100	53190	93892	29153	52666	66114	209540
MEDN0767	12,13-EpOME	FA	Oxidized lipids	295.227	296.235	[M-H]-	C18H32O3	31775	21534	22186	87898	28457	33497	24174	31467	32757	26394	24592	34209	50867	24847	15780	12681	70361	247580	17725	27459	40648	79834	20875	9729.1	94418	31343	26696	35192	66235	27051	23177	18949	80462	16966	36218	38225	51068	81512	31633	51868	20398	37564
MEDN0768	13-oxoODE	FA	Oxidized lipids	293.212	294.219	[M-H]-	C18H30O3	18599	9979.4	8834.7	10183	17766	15354	10966	13346	18215	11551	18593	24171	10420	11737	10886	17496	21592	20198	7469.8	12682	13808	29926	13899	7192.2	120240	26500	24968	26877	19420	11339	20739	5879.7	19443	9351.9	15027	19447	18780	21066	12290	28963	13384	19487
MEDN0769	14(S)-HDHA	FA	Oxidized lipids	343.227	344.235	[M-H]-	C22H32O3	372570	390090	124310	271190	348150	314070	318290	176950	1121600	130610	252860	300860	365100	743770	231220	413120	459840	298400	192110	119540	95623	210680	225600	114170	132110	218830	87168	614790	327090	295100	317700	167790	473060	124770	418230	310480	103520	415140	72309	166290	362970	989000
MEDN0771	15-oxoETE	FA	Oxidized lipids	317.212	318.219	[M-H]-	C20H30O3	5908.7	3887.2	862.88	3243.5	2399.6	3565.8	2134.3	2102.9	6595.6	2626	4857.6	3052.3	4241.8	2368.7	4547.4	4823.1	3838.7	716.16	2036	1696.1	593.6	2162.5	2513.7	1661.7	2671	5975.4	3721.6	5050.9	5474.7	4416.6	2363.6	1783.9	3338.2	2375.2	2962.9	5307.9	2842.3	4044.2	1292.7	3816.4	2046.2	7226.9
MEDN0774	19(S)-HETE	FA	Oxidized lipids	319.227	320.235	[M-H]-	C20H32O3	2953.4	2707.9	2285.4	2853	2470.4	2520.2	1104.5	2034.7	2425.8	1670.1	4314	1914.4	4080.7	3459.9	5237.9	6057.8	2662.9	2169.9	3023.9	2640.9	822.54	2596.6	2883.5	1747.4	3035.8	3778	1933.4	4052.2	4275.1	2387.4	3706.4	1233.8	3556.1	2380	3085.4	5589.1	2858.4	2451.6	1471	1935.6	2765.3	8364.8
MEDN0775	20-HETE	FA	Oxidized lipids	319.227	320.235	[M-H]-	C20H32O3	2953.4	2707.9	2285.4	2853	2470.4	2520.2	1104.5	2034.7	2425.8	1670.1	4314	1914.4	4080.7	3459.9	5237.9	6057.8	2662.9	2169.9	3023.9	2640.9	822.54	2596.6	2883.5	1747.4	3035.8	3778	1933.4	4052.2	4275.1	2387.4	3706.4	1233.8	3556.1	2380	3085.4	5589.1	2858.4	2451.6	1471	1935.6	2765.3	8364.8
MEDN0776	5(S),15(S)-DiHETE	FA	Oxidized lipids	335.222	336.23	[M-H]-	C20H32O4	2233.3	3177.1	620.67	1546.5	2558.6	2772	1168.5	789.99	3840.9	804.85	1448.8	940.93	1298.4	1857.5	1526.4	972.35	2104	2112.3	238.87	684.54	978.28	468.99	1092.9	198.83	596.73	1541	414.05	2511.6	3645	2775.9	1242.8	996.75	1926.6	998.28	1372.1	2326.8	532.15	2266.3	565.02	964.34	1385.2	5454.8
MEDN0777	5,6-DiHETrE	FA	Oxidized lipids	337.238	338.246	[M-H]-	C20H34O4	30987	22341	6311.7	10331	14027	17065	13962	19814	18483	21727	23279	16219	10721	16557	14594	21636	9324.8	17157	24871	31073	19564	17285	12044	4182.7	28031	33899	17240	38434	35434	13766	32920	9727.7	23414	21218	9397.6	25501	21979	19283	14502	14184	18198	53224
MEDN0779	5-HETrE	FA	Oxidized lipids	321.245	322.251	[M-H]-	C20H34O3	16186	18487	4604.7	12214	16677	15388	20752	4341.9	25881	8627.1	12992	10951	11915	13724	14696	15183	23141	7607.4	5504.9	7449.3	4561.9	5667.7	9004.9	4378.3	5658.4	16028	6094.8	29106	10171	11598	14613	6883.7	24328	8425.1	22327	20566	5723.2	18656	2543.9	12523	7694.5	35102
MEDN0783	9,10-EpOME	FA	Oxidized lipids	295.227	296.235	[M-H]-	C18H32O3	31775	21534	22186	87898	28457	33497	24174	31467	32757	26394	24592	34209	50867	24847	15780	12681	70361	247580	17725	27459	40648	79834	20875	9729.1	94418	31343	26696	35192	66235	27051	23177	18949	80462	16966	36218	38225	51068	81512	31633	51868	20398	37564
MEDN0784	9-oxoODE	FA	Oxidized lipids	293.212	294.219	[M-H]-	C18H30O3	18599	9979.4	8834.7	10183	17766	15354	10966	13346	18215	11551	18593	24171	10420	11737	10886	17496	21592	20198	7469.8	12682	13808	29926	13899	7192.2	120240	26500	24968	26877	19420	11339	20739	5879.7	19443	9351.9	15027	19447	18780	21066	12290	28963	13384	19487
MEDN0793	Prostaglandin E2	Hormones and hormone related compunds	Hormones and hormone related compunds	351.217	352.225	[M-H]-	C20H32O5	28359	9210.6	4001.8	32699	91736	22495	4255.5	52007	12235	1013500	103940	38916	153610	17557	422720	11488	317750	31832	211960	149370	6223.7	14190	5119.2	3026.4	12422	1853000	46647	4629000	10627	87559	15272	58832	127700	51718	15911	168220	178930	17201	693130	48381	17606	11699
MEDN0807	FFA(14:0)	FA	FFA	227.201	228.37	[M-H]-	C14H28O2	8236.8	6793.6	7858.9	5396.7	5672.8	8231	7896.3	5911.2	9998.2	5855	10421	13438	6327.4	6997	5860.6	6988.3	4353.5	6930.4	10341	7287.3	9227.7	21766	7797.6	7095	17986	14670	6154.2	14877	8876.9	5776.6	15787	3872.6	15486	8119.1	7314.5	9145.4	8227.2	4598	9031.2	4901.9	9195.9	24312
MEDN0808	Myoinositol	Carboxylic acids and derivatives	Sugar alcohols	179.057	180.16	[M-H]-	C6H12O6	49270	49355	93223	76255	69577	60302	49480	82143	70505	76201	60730	67010	86257	68972	51117	51628	47991	39676	94927	49919	87269	68438	113870	75605	86620	76976	93045	63649	93933	66538	85221	68916	73905	57269	77412	78450	107660	73987	89098	81117	117700	85491
MEDN0810	4-Hydroxycyclohexylcarboxylic acid	Organic acid And Its derivatives	Organic acid And Its derivatives	143.071	144.079	[M-H]-	C7H12O3	14350	4610.2	453.62	51449	926.16	2259.9	75170	378.29	375.7	916.76	72481	2370.2	2433.9	1328.8	6257.3	6115	1236.8	18336	3487.5	1300.3	954.76	4359.1	758.36	720.38	35472	751.96	2337.3	7547	1147	3036.7	464.44	4630.7	370.87	357.79	1118.9	3010.7	7280.6	464.71	8902.9	1492.6	10023	8080.2
MEDN0811	FFA(9:0)	FA	FFA	157.123	158.131	[M-H]-	C9H18O2	22360	16933	18844	18039	22261	18401	19896	18223	28181	21739	15701	17023	16059	18911	19773	22514	13278	24283	19764	15955	19700	20513	19165	16718	16397	22064	22384	24151	16198	17835	18490	21642	22747	21555	20265	22857	17367	22077	21918	18377	19709	21858
MEDN0816	4-Hydroxyhippurate	Amino acid and Its metabolomics	Amino acid derivatives	194.045	195.053	[M-H]-	C9H9NO4	136530	37913	21286	266110	67528	59044	81312	40263	34507	20217	313190	67348	101870	54731	50780	36322	35006	65741	190870	24290	25529	32847	10174	23986	25643	177240	22385	22117	24931	18295	23266	20315	43506	18163	82823	25181	43784	275010	40913	19909	36860	143860
MEDN0818	N-acetyl-beta-alanine	Amino acid and Its metabolomics	Amino acid derivatives	130.05	131.058	[M-H]-	C5H9NO3	1049200	3805500	797570	1108700	1092400	985430	1081700	795470	1171400	992360	1030700	1104000	809990	976540	873450	958310	942580	847760	880630	661410	587730	645100	744130	495610	603450	866530	724090	1130600	1165400	821710	958960	467360	1018400	702720	1259600	1011600	934620	843130	662920	600220	980220	1181900
MEDN0824	7-ketodeoxycholic acid	Hormones and hormone related compunds	Hormones and hormone related compunds	405.264	406.272	[M-H]-	C24H38O5	2024.2	3561.2	10423	1024.4	19514	1080.5	3453.1	1674.2	2468.7	5176.7	6718.6	1033.6	1878.9	7214.9	5324.1	295.5	3156.1	20550	11625	1183.5	1484.3	693.76	3270.4	6480.6	4054.5	18841	2964.5	17006	1340.6	1671.9	10502	6880.4	5168.6	496.84	16648	297.53	13037	1193.5	3377.4	595.61	784.37	3462
MEDN0826	3-(3-Hydroxyphenyl)-3-hydroxypropanoic acid	Organic acid And Its derivatives	Organic acid And Its derivatives	181.05	182.058	[M-H]-	C9H10O4	4317.9	27045	14148	28767	13451	39095	503620	2645.6	108010	22303	76682	557800	98118	1958	19819	85974	21307	48035	73954	3464.1	231410	1117.9	23688	4466.5	8351.6	51011	33937	4464.3	50413	90310	91569	4643.6	24726	5979.3	20618	44828	86599	36234	1343.7	25223	11174	59375
MEDN0827	N-acetylornithine	Amino acid and Its metabolomics	Amino acid derivatives	173.093	174.1	[M-H]-	C7H14N2O3	1587500	924330	1611600	1881400	1850800	1305600	929380	1144300	986920	2391600	971190	1326400	1385000	1425700	860400	1681100	1565100	1003600	1401800	1355700	1335400	1304200	2230500	1572000	1321700	1734700	1181300	1508500	1790000	1380400	2393800	1346600	2076600	1172100	1492000	2435900	1888100	1385400	1580600	1443500	1423900	1873800
MEDN0832	D-Glucosamine 6-Phosphate	Carboxylic acids and derivatives	Phosphate sugars	258.038	259.151	[M-H]-	C6H14NO8P	25271	23235	23638	17491	16929	20377	17291	16892	27956	16005	19344	20104	24530	18913	19525	19085	22301	27329	20269	25480	18313	25942	26181	18051	25741	20181	24289	20118	18955	31535	22852	20731	15875	22411	23513	22146	25312	23559	30505	24266	16556	16384
MEDN0833	3-Dehydroshikimate	Organic acid And Its derivatives	Organic acid And Its derivatives	171.029	172.037	[M-H]-	C7H8O5	122080	82477	157040	157720	100040	124880	150720	169540	180570	206350	215580	129340	175960	204450	118890	133270	194590	172970	194330	163110	148120	206680	238830	278570	188230	270980	162710	135880	75397	160340	119310	418870	207350	138200	155000	111090	136510	176510	257950	158930	100120	160180
MEDN0841	3-Ureidopropionate	Organic acid And Its derivatives	Organic acid And Its derivatives	131.046	132.054	[M-H]-	C4H8N2O3	21486	7224.1	6643.5	26949	8857	7110.7	13351	10135	7413.1	11200	8256.3	9372	16865	4988	14617	15090	8538.9	10560	6596	7432.9	8798.3	6587.3	9041.9	8393.5	15285	15594	6044.7	18982	8269.9	12972	4932	3860.6	13985	10328	1929	7705.3	5167.3	17171	12616	17223	13787	6831
MEDN0843	N-Amidino-L-Aspartate	Amino acid and Its metabolomics	Amino acid derivatives	174.052	175.059	[M-H]-	C5H9N3O4	110680	73445	91305	95317	145700	80502	89143	95308	64435	164560	75757	74415	109250	107350	72574	104270	121650	66128	116260	110080	88353	74810	137500	96634	88265	131360	77255	105010	134550	84932	143330	94519	119430	78402	78593	170500	136820	110370	108460	94860	106230	115630
MEDN0851	Indole-3-Pyruvic Acid	Organic acid And Its derivatives	Organic acid And Its derivatives	202.05	203.058	[M-H]-	C11H9NO3	5229.5	5005.7	12354	1040.8	20354	2536.8	9975.6	15913	3699.1	12139	21298	4579.7	11417	12562	18856	15661	1023.7	5681.8	4646.2	9588.3	1850.2	13953	18028	12708	17032	21018	11506	9877.9	7165.4	1926.9	12769	15680	6851.6	7208.8	12912	12422	16531	6086.7	10295	1442.5	9400.6	7674
MEDN0854	3-Methylglutaric acid	Organic acid And Its derivatives	Organic acid And Its derivatives	145.051	146.058	[M-H]-	C6H10O4	83862	72895	74252	33884	90266	78860	56347	59960	68426	62734	62620	68981	46453	34867	48996	57838	54858	43561	61440	56537	35898	74527	57062	23100	46795	56592	68162	89181	69531	55974	60784	40431	66130	35537	58974	49205	55565	12347	82706	14536	58130	72071
MEDN1003	Inosine	Nucleotide And Its metabolomics	Nucleotide and Its metabolomics	267.073	268.081	[M-H]-	C10H12N4O5	130410000	146700000	56496000	65335000	94378000	74971000	69299000	31334000	70155000	74354000	63928000	79884000	30740000	133470000	82982000	55497000	56919000	140070000	261420	59740000	58276000	30266000	26367000	29122000	29992000	53365000	60065000	128670000	113120000	82827000	71123000	29033000	38457000	118600000	88435000	58267000	98013000	56084000	55328000	49114000	58411000	100460000
MEDN1005	Phosphoenolpyruvate	Organic acid And Its derivatives	Phosphoric acids	166.975	167.982	[M-H]-	C3H5O6P	4505600	4330900	2483600	4164000	3164000	5053900	7716300	2900700	7224700	5337700	3595700	5656700	3873800	4316100	3132800	4065900	2895600	4019300	3993300	2710500	3186700	3512400	3455000	3697600	4402200	6089600	4963500	9895600	6758700	4917900	4226300	4805500	3584900	4824400	4979100	4729200	4943700	4726900	2761000	3535900	5070800	16502000
MEDN1006	Uric acid	Organic acid And Its derivatives	Organic acid And Its derivatives	167.021	168.028	[M-H]-	C5H4N4O3	5494300	8366600	1139900	5977700	5764400	5771900	8648800	1179700	11641000	10464000	9623300	8346100	607510	7614800	1553900	2063900	2955400	3671900	4851800	1530400	1016100	1019500	3562800	172590	3196300	10460000	5787500	22474000	13043000	3547900	1634200	859740	3055400	5224800	9845500	5691800	3970800	6132700	1844200	934730	3676900	17991000
MEDN1007	Diphenylamine	Benzene and substituted derivatives	Benzene and substituted derivatives	168.081	169.089	[M-H]-	C12H11N	126380	141400	123960	140300	148160	140890	134700	123370	148480	134500	137420	124800	124670	126810	127200	121200	121920	124930	140160	118050	121910	116630	99750	88146	129470	123750	87226	116630	112090	83833	97450	86229	98264	81901	109750	102330	113340	105660	104080	96002	132240	123170
MEDN1009	3-hydroxyphenylacetic acid	Organic acid And Its derivatives	Organic acid And Its derivatives	151.04	152.047	[M-H]-	C8H8O3	119610	169620	130860	129260	125740	141160	132960	139960	217970	171380	228320	205130	129390	70833	133280	38655	80121	126930	61093	117500	81452	71872	146230	81306	101430	189950	84013	206210	205760	65179	95125	53467	189330	100580	132300	113520	219520	125130	144860	74864	131970	113320
MEDN1011	D-Mannitol	Carboxylic acids and derivatives	Sugar alcohols	181.071	182.079	[M-H]-	C6H14O6	11225	8521.6	9404.2	12153	19403	18150	15719	6786.5	14474	11093	12261	10187	14938	7821.4	4986.5	14414	11936	18318	12127	20488	18214	5586.1	9546.6	5532.1	7769.6	14643	22562	22721	17304	9000.6	11225	15454	8674.8	8982.1	24660	10549	12234	21460	12182	16126	7087.9	13273
MEDN1012	7-Methylguanine	Nucleotide And Its metabolomics	Nucleotide and Its metabolomics	164.057	165.065	[M-H]-	C6H7N5O	19014	22228	23865	30330	20565	24958	33751	12132	20370	30742	38842	26733	24217	21815	18051	16741	25258	23439	23826	22004	19058	18897	16900	12107	17357	28571	14480	28801	28277	19458	23415	17127	30165	20805	23663	27626	27970	26503	20015	19856	26163	28922
MEDN1035	13(R)-HODE	FA	Oxidized lipids	295.2	296.235	[M-H]-	C18H32O3	218350	191720	130130	124950	178200	140030	181780	95404	395050	98154	252130	140800	179950	170580	118730	155380	440060	183230	115430	77692	92968	161100	109860	75814	1166100	175830	140420	240800	159430	137080	211600	99378	404190	88183	246420	205440	127910	403500	97601	262600	156890	505270
MEDN1041	9(S)-HpOTrE	FA	Oxidized lipids	309.207	310.214	[M-H]-	C18H30O4	102040	136720	49864	273760	89630	131240	45526	172720	152390	93000	135040	186710	149700	44479	76340	31036	161310	16259	90797	128410	341440	66847	292620	123600	72034	92456	108760	125310	86828	121830	60467	35747	630290	47210	57511	98491	95670	184350	110570	155130	204410	117150
MEDN1045	2-Amino-4,6-pteridinediol	Nucleotide And Its metabolomics	Nucleotide and Its metabolomics	178.038	179.044	[M-H]-	C6H5N5O2	8234.2	13479	9950.9	18185	7003.1	11529	20445	7206.8	16447	12141	10860	12598	11709	7621	7186.2	5201.2	8832.1	12376	12252	8796	3354.4	6279.8	4364.6	4086.4	9775.6	10979	11136	18891	16088	11086	7399.6	3911.5	12983	25268	5040.7	15412	10247	8760.6	4839.3	6540.3	10428	16197
MEDN1052	2-Hydroxyglutaric acid	Organic acid And Its derivatives	Organic acid And Its derivatives	147.029	148.037	[M-H]-	C5H8O5	29040	7920.5	5495.3	16241	45429	21749	29282	17943	21863	16720	56250	39820	15184	13717	19420	19717	40233	33008	25497	16661	18885	16836	18004	11116	14679	28477	35905	29210	33031	19545	30898	22535	37698	17787	43654	41701	20481	29879	22366	8827.8	34926	22234
MEDN1056	Iminodiacetic acid	Organic acid And Its derivatives	Organic acid And Its derivatives	132.03	133.037	[M-H]-	C4H7NO4	1717200	1303400	1573200	1231400	1189200	1437100	1688100	974970	1800900	1141100	1226000	1033200	1043600	1707000	1588800	1809300	1481400	1460200	822880	1256700	779420	1157800	1267500	997640	1145500	1291200	1350600	1766600	1590900	1390800	1543800	1290300	1416900	1511600	2083100	1441700	1077200	1393000	535450	1439200	857450	1465400
MEDN1059	Tauroursodeoxycholic acid	Bile acids	Bile acids	498.289	499.297	[M-H]-	C26H45NO6S	205260	171120	111650	154790	176980	130730	154350	214180	300200	196400	267810	230380	182520	202180	218590	127400	185510	162420	167000	141110	142270	173980	149490	179630	194930	377940	152950	174950	147510	184000	122920	210090	154390	123850	225130	314260	139920	199440	187640	138100	133570	174700
MEDN1061	Glycine deoxycholic acid	Bile acids	Bile acids	448.306	449.314	[M-H]-	C26H43NO5	124310	277540	553020	135360	821220	843680	976280	1674000	543.76	495070	93716	513700	138160	123320	2266.7	148610	680580	91018	2567.8	24528	146160	412970	128860	17797	800.51	793.27	640950	2342.5	456070	583170	1645.4	59285	123700	733730	1338.7	146820	911660	719720	520.93	326730	384870	112790
MEDN1064	N-arachidene glycine	Aldehyde,Ketones,Esters	Esters	360.254	361.262	[M-H]-	C22H35NO3	3844	3741.6	2661.8	10769	4126.3	3258.1	2877.7	6768.7	3068.1	3963.8	9004.3	4754.9	3012.6	3339.5	4805.2	2839.6	4161	4274.6	3740.9	5142.5	3186.6	5544	4655.6	3450	2791.3	13192	3343.8	8900.3	6550.2	5246.4	5826.3	5795.5	7788.8	6150.8	3545.1	5636.5	5434.2	3432.3	11933	2157.2	9452.5	11134
MEDN1066	Gly-Val	Amino acid and Its metabolomics	Small Peptide	173.093	174.1	[M-H]-	C7H14N2O3	22570	19382	158830	33794	45016	36983	19487	38902	67009	59028	11343	58441	23381	41272	28063	23382	20045	21052	7908.7	53813	55314	16705	60116	55121	26151	14844	77737	28269	66173	33792	33295	14215	35677	13016	17348	37561	97843	24260	18143	16280	43325	45316
MEDN1069	FFA(18:4)	FA	FFA	275.201	276.209	[M-H]-	C18H28O2	880130	234060	701810	229190	580260	1735800	464850	296450	394770	397230	665000	1769800	270140	455000	311980	1450700	274900	526620	837040	131480	1330400	2405600	258290	237660	1265200	673910	728710	624960	761940	405900	1524200	145280	932020	175070	493420	1694700	835200	170980	672390	347020	407240	1884400
MEDN1078	cis-EODA	FA	Oxidized lipids	297.243	298.251	[M-H]-	C18H34O3	65621	63145	100990	48133	62232	50334	44749	43030	110610	37071	83840	69377	61496	73616	41715	40452	65684	121280	47209	59419	30484	43538	39027	43608	120130	92516	51169	80484	57585	34143	136860	37810	293100	55610	113360	76146	91399	76904	67134	110670	57315	105360
MEDN1079	FFA(22:6)	FA	FFA	327.232	328.24	[M-H]-	C22H32O2	3419100	1856000	3829100	2926700	2308300	2565200	2583200	2576400	5971700	2535100	2873100	4422200	2485900	5233800	1861200	3319100	1794300	4100100	4402500	3026700	1928900	5078200	2608600	2264500	3963600	6762100	1953600	5302900	3826400	2388600	6262400	1940700	6483000	2433600	2819500	3696400	3386100	2161300	2573500	1212200	4763600	9192100
MEDN1081	12,13-DiHOME	FA	Oxidized lipids	313.238	314.246	[M-H]-	C18H34O4	154150	98932	130140	345710	218290	81333	172190	191110	212660	113490	149590	188500	180550	250660	121880	71913	561250	245550	153840	218640	121620	155600	75966	97499	2193500	222780	162690	203410	134250	122610	168770	95061	810450	180900	240190	229850	253960	491430	169170	265830	202080	268060
MEDN1082	8-isoprostaglandin F1α	Hormones and hormone related compunds	Hormones and hormone related compunds	355.2	356.256	[M-H]-	C20H36O5	6542.4	20591	16990	29477	14330	34910	23996	13389	57887	87291	10459	34097	32266	82827	8678.7	7520.1	5103.5	58908	34848	53196	8317.8	2691.5	28069	13731	9474.9	40149	14579	43873	19465	34561	43262	27825	1768.6	15358	3327	15933	5852.8	38341	12097	3834.2	60452	36909
MEDN1098	2-ethyl-2-hydroxybutyric acid	Organic acid And Its derivatives	Organic acid And Its derivatives	131.071	132.079	[M-H]-	C6H12O3	17204	30028	20268	25359	80973	29548	31883	25612	20182	28357	39146	65173	18259	26219	14635	39543	21851	32875	19931	8502.1	34359	16740	21646	4215.5	29020	34073	34232	58816	52757	31156	41580	18242	41426	19207	28067	53145	28636	28919	10831	26445	15777	45158
MEDN1104	7-ketolithocholic acid	Bile acids	Bile acids	389.269	390.277	[M-H]-	C24H38O4	80582	109050	71009	129890	525210	127380	238880	58571	721810	745090	217500	468350	195330	107670	532070	32231	212740	710380	411040	72588	200180	75486	83140	1030500	80128	797350	74886	187840	49489	77698	146940	215650	135170	66834	941120	32212	594930	97568	368230	64501	113830	204800
MEDN1108	1,6-anhydro-β-D-glucose	Carboxylic acids and derivatives	Sugars	161.045	162.053	[M-H]-	C6H10O5	9792	8518.8	19580	15972	12184	14926	11418	18649	20524	28064	16580	14111	19354	9754.3	9289.5	15563	10110	7590.2	23844	12705	16956	23857	19012	18458	17443	17453	20908	15614	17357	11662	17882	16233	8738.8	19345	21910	28726	19124	18979	25086	14025	26527	40625
MEDN1112	16-Hydroxyhexadecanoic acid	FA	FFA	271.227	272.235	[M-H]-	C16H32O3	3759700	3201500	2909000	3023200	3906900	3869800	3772100	3533500	7164900	4430600	4626300	5470700	4193300	4135800	4083200	4117400	4337000	3405400	4546500	3618600	3444600	3153200	4129200	2707000	4260500	5524500	4093900	6361500	7437200	3244200	5808200	2482200	6069100	4076900	5957000	7312000	5449900	5242800	4979600	2851000	6800400	8278600
MEDN1113	12-ketolithocholic acid	Bile acids	Bile acids	389.269	390.277	[M-H]-	C24H38O4	80582	109050	71009	129890	525210	127380	238880	58571	721810	745090	217500	468350	195330	107670	532070	32231	212740	710380	411040	72588	200180	75486	83140	1030500	80128	797350	74886	187840	49489	77698	146940	215650	135170	66834	941120	32212	594930	97568	368230	64501	113830	204800
MEDN1121	23-Nordeoxycholic acid	Bile acids	Bile acids	377.269	378.277	[M-H]-	C23H38O4	1419.2	9646.7	12650	10462	13129	25252	4988.7	31413	725.57	5684.8	7742.9	35742	6115.1	6908.4	241.76	7783.6	8761.2	2887.3	573.34	1863.1	3865.9	1199.7	12488	483.85	209.25	413.05	5856.2	241.65	8470.3	14619	179.24	2753	7430.4	13053	235.26	8134.1	11783	5448.8	332.39	3114.7	2520.3	16197
MEDN1125	N,N′-dicyclohexylcarbodiimide	Alcohol and amines	Polyamines	205.17	206.178	[M-H]-	C13H22N2	10634000	9961900	10654000	10599000	8466700	10152000	9953300	9520400	10319000	9592500	10573000	10078000	10048000	10416000	9330800	9109800	9779700	8510300	8129200	9964600	9344200	9885500	10409000	9759000	10360000	10227000	11312000	9900400	10395000	11123000	10520000	10849000	11393000	10556000	10119000	12225000	10725000	11485000	9703300	11773000	10842000	10961000
MEDN1126	Gamma-Mercholic Acid	Bile acids	Bile acids	407.28	408.288	[M-H]-	C24H40O5	1753300	1281900	6875300	3786800	15265000	2035400	656010	1109000	2634200	5932700	4876100	1922600	1495800	5364200	4701800	590760	3083600	26774000	1400500	1627000	6858400	1689400	749930	747020	1532200	9373200	1185000	3693700	2043100	1720600	1453800	1869200	1515400	933500	32366000	493640	6729900	14433000	730360	1719100	3062600	2922300
MEDN1129	Erythrose	Carboxylic acids and derivatives	Sugars	119.034	120.042	[M-H]-	C4H8O4	19646	37310	115380	24354	9026.7	18568	20409	18255	28716	33762	16637	29921	18415	27672	15234	23050	17138	27333	33298	25500	9883.7	17065	22536	5672.2	7538.7	33950	17222	15930	34193	26759	32259	14514	7505.3	22585	23470	31487	28311	20564	15979	16457	15023	36958
MEDN1135	Heparin	Alcohol and amines	Alcohols	315.29	316.298	[M-H]-	C19H40O3	77738	79507	102890	68492	69351	115080	110600	77133	83708	73010	85442	85108	77164	79112	108990	185920	90770	95358	73200	76463	77136	92945	74829	76340	65921	108550	74591	71372	92271	64716	80736	53245	90530	41879	57440	131060	67815	125250	165990	106020	77992	100950
MEDN1139	DL-2-hydroxystearic acid	FA	FFA	299.259	300.266	[M-H]-	C18H36O3	131820	124090	100100	119280	134240	113200	128790	119910	176620	132330	134230	136650	119320	149510	136660	135890	105810	71024	134440	108660	95031	78755	117580	75279	105500	210140	117650	180980	212320	101220	135540	72174	151990	113530	189970	252860	180010	158830	121400	91666	176920	275540
MEDN1141	Apocholic acid	Bile acids	Bile acids	389.269	390.277	[M-H]-	C24H38O4	80582	109050	71009	129890	525210	127380	238880	58571	721810	745090	217500	468350	195330	107670	532070	32231	212740	710380	411040	72588	200180	75486	83140	1030500	80128	797350	74886	187840	49489	77698	146940	215650	135170	66834	941120	32212	594930	97568	368230	64501	113830	204800
MEDN1148	2-hydroxyhexadecanoic acid	FA	FFA	271.227	272.235	[M-H]-	C16H32O3	3759700	3201500	2909000	3023200	3906900	3869800	3772100	3533500	7164900	4430600	4626300	5470700	4193300	4135800	4083200	4117400	4337000	3405400	4546500	3618600	3444600	3153200	4129200	2707000	4260500	5524500	4093900	6361500	7437200	3244200	5808200	2482200	6069100	4076900	5957000	7312000	5449900	5242800	4979600	2851000	6800400	8278600
MEDN1150	Indole-3-carboxylic acid	Heterocyclic compounds	Indole and Its derivatives	160.04	161.048	[M-H]-	C9H7NO2	39656	35530	36072	32874	49109	39965	34665	27628	40923	37170	39035	35070	39682	40008	36791	33256	40483	29430	33172	31422	35592	31771	37731	26024	37081	33159	40499	40181	41639	27483	31530	28399	32375	28124	47426	38179	53886	38400	39218	22845	42976	31350
MEDN1155	4-Methyl-2-oxovaleric acid	Organic acid And Its derivatives	Organic acid And Its derivatives	129.055	130.063	[M-H]-	C6H10O3	7394.5	8581.7	7714.4	3582.1	7587.9	8933.2	5679.4	7216.8	9275.2	9472.4	8250.3	7743.7	4981	6865.4	5000.3	6189.6	4630	3173.3	7553.4	6601.8	5487.8	6328.8	9068.4	3776.3	5497.9	7420.2	6016	11389	8661.3	4158.7	3629	1540.9	5465.3	4824.6	4624.7	7102.6	7965	4404.1	5336.4	2379.5	7473.6	8427.5
MEDN1156	FFA(20:4)	FA	FFA	303.2	304.24	[M-H]-	C20H32O2	98365	65732	59888	84443	82594	98990	73592	77406	120220	112700	103870	100400	96476	72759	72333	90595	80576	76245	101110	83068	61803	93484	98335	66222	121050	199580	101390	166500	162530	108290	141490	66833	169940	90822	115300	154900	134890	81788	73263	54167	133960	231930
MEDN1159	FFA(15:1)	FA	FFA	239.201	240.209	[M-H]-	C15H28O2	8731300	529420	504140	541280	6740700	357670	6997500	7221400	1633800	977950	683050	369850	5261900	6862400	6342000	7891200	2387800	667690	598580	540260	634760	6861300	6882800	6813700	1416100	652600	538000	561780	466920	436710	7085400	7889500	621550	713980	801760	676350	500260	455510	9148700	469750	619850	747390
MEDN1167	4-Hydroxybenzoic Acid	Benzene and substituted derivatives	Phenolic acids	137.024	138.032	[M-H]-	C7H6O3	496410	609720	485950	686170	651540	552070	582310	577410	877030	572780	633160	1125700	543800	620620	466080	653400	523240	622110	702210	658570	630060	579740	401850	630840	584470	637940	486980	433570	1074300	639540	523960	585730	685940	459810	588910	586820	489120	628540	525390	623970	435140	496620
MEDN1200	L-tyrosine methyl ester 4-sulfate	Amino acid and Its metabolomics	Amino acid derivatives	274.039	275.046	[M-H]-	C10H13NO6S	11292	28274	12701	15308	13606	11959	18399	13520	16778	78835	3803.1	21799	25462	19365	5971.4	14106	7296.6	7474.7	16525	49657	13719	11438	12525	11298	3650.7	15194	25739	11788	19261	39266	14310	4899	3802	5978.1	19734	30791	11126	13568	15203	7290	10907	13261
MEDN1221	D-Mannose 6-phosphate	Carboxylic acids and derivatives	Phosphate sugars	259.022	260.03	[M-H]-	C6H13O9P	21531	34588	27385	42140	54472	33135	46513	22475	47680	44724	51418	23498	33428	56133	39996	30143	19323	33641	28444	31928	69815	25633	70848	24486	26339	56292	34294	52546	19909	55307	54637	37219	12288	38130	57195	78529	32398	34799	47736	19041	41847	53709
MEDN1224	Bis(1-inositol) -3,1'-phosphate 1-phosphate	Alcohol and amines	Alcohols	501	502.049	[M-H]-	C12H24O17P2	133750	152000	52476	110550	95615	71925	89224	70653	76196	90413	110520	64708	74575	102800	97001	100300	110580	81867	54881	61281	89176	63017	69479	73903	78184	113390	78514	108430	123640	76739	89321	94346	88345	108090	95737	109950	90002	91468	84350	70855	100940	145050
MEDN1226	2-amino-4-oxovaleric acid	Organic acid And Its derivatives	Organic acid And Its derivatives	130.05	131.058	[M-H]-	C5H9NO3	1049200	3805500	797570	1108700	1092400	985430	1081700	795470	1171400	992360	1030700	1104000	809990	976540	873450	958310	942580	847760	880630	661410	587730	645100	744130	495610	603450	866530	724090	1130600	1165400	821710	958960	467360	1018400	702720	1259600	1011600	934620	843130	662920	600220	980220	1181900
MEDN1235	L-2-amino-6-oximelic acid	Organic acid And Its derivatives	Organic acid And Its derivatives	188.057	189.064	[M-H]-	C7H11NO5	14369	634680	11357	14940	23442	15980	17607	9599.1	31329	21535	11664	31774	24551	18423	10356	15913	20254	23768	15885	11898	15980	12243	8860.1	21660	15616	21231	15658	15570	19898	12178	13647	7639.8	17890	18937	18351	15477	33835	25382	11275	13051	10167	13661
MEDN1246	3-(pyrazol-1-yl) -L-alanine	Amino acid and Its metabolomics	Amino acid derivatives	154.062	155.069	[M-H]-	C6H9N3O2	1543200	1224600	866600	1299800	1266300	956620	1110400	969310	1061600	1380200	1283300	1016000	1087500	1187500	1021500	1253700	982500	1016800	1319700	1035200	806850	907660	928580	959950	964550	1253300	978770	1287500	1568700	1271400	1694600	818450	1130300	1483100	1493800	1630100	1073400	1000500	1169600	1181700	1362400	2010700
MEDN1247	1-pyrroline-4-hydroxy-2-carboxylate	Heterocyclic compounds	Heterocyclic compounds	128.035	129.043	[M-H]-	C5H7NO3	229700	403350	109110	137770	247860	182190	271380	156920	225120	162900	278710	170140	121630	317410	215460	252770	287140	223960	149570	240990	108970	108160	116530	49406	119180	234660	130670	181600	243460	228270	244890	115750	110720	216150	216350	148150	137030	168590	166750	153250	152290	167240
MEDN1258	LPS(16:2/0:0)	GP	LPS	490.221	491.228	[M-H]-	C22H38NO9P	4324.8	1765.2	2906.1	2928	3879.2	3540.1	3284.5	3743.6	5129.8	2828.5	2470.3	5982.3	3687.1	3782.3	4585.5	3080.8	2744.3	2393.7	4585	2307.1	3696	6058.4	3111.5	2136	3895.4	3602.5	2851.6	3712.4	3571.7	3997	3286.3	1338.8	2433.5	972.82	3959.7	3292.8	4860.8	7953.7	4690	2749.2	5922.9	6194
MEDN1264	LPE(0:0/22:4)	GP	LPE	528.31	529.317	[M-H]-	C27H48NO7P	238740	460190	81173	284770	380020	267580	191150	233490	323540	409720	420710	552270	228270	126940	194800	219080	138810	152990	266750	178190	819340	731920	322910	95188	601350	659400	138210	650650	378740	258340	286910	207730	371580	281160	255970	218810	487640	339760	652330	505420	301020	1085600
MEDN1265	LPE(22:4/0:0)	GP	LPE	528.31	529.317	[M-H]-	C27H48NO7P	238740	460190	81173	284770	380020	267580	191150	233490	323540	409720	420710	552270	228270	126940	194800	219080	138810	152990	266750	178190	819340	731920	322910	95188	601350	659400	138210	650650	378740	258340	286910	207730	371580	281160	255970	218810	487640	339760	652330	505420	301020	1085600
MEDN1267	LPE(0:0/22:5)	GP	LPE	526.296	527.301	[M-H]-	C27H46NO7P	331620	879840	147000	1102500	626430	420910	574880	601020	721860	571640	849500	1150500	271840	266560	326330	479220	190840	216240	610370	592010	926110	1332900	791920	350180	1539400	1617000	235020	1293000	1362000	193080	455910	529070	1670500	494070	287350	306880	762220	579500	808610	492750	1100400	2012400
MEDN1268	LPE(22:5/0:0)	GP	LPE	526.296	527.301	[M-H]-	C27H46NO7P	331620	879840	147000	1102500	626430	420910	574880	601020	721860	571640	849500	1150500	271840	266560	326330	479220	190840	216240	610370	592010	926110	1332900	791920	350180	1539400	1617000	235020	1293000	1362000	193080	455910	529070	1670500	494070	287350	306880	762220	579500	808610	492750	1100400	2012400
MEDN1269	LPE(0:0/22:6)	GP	LPE	524.28	525.286	[M-H]-	C27H44NO7P	8840600	7983800	6528400	9812100	9549600	6719900	5063500	6301600	10709000	8061800	9095200	16735000	5980800	9737500	5150000	8699800	5537700	6566300	11887000	6041300	11606000	12641000	9137100	5364700	12830000	9528400	5289000	12886000	13419000	5765800	10134000	4029200	13176000	6015300	9849400	12883000	12312000	7638000	16961000	3266000	14385000	24340000
MEDN1270	LPE(22:6/0:0)	GP	LPE	524.28	525.286	[M-H]-	C27H44NO7P	8840600	7983800	6528400	9812100	9549600	6719900	5063500	6301600	10709000	8061800	9095200	16735000	5980800	9737500	5150000	8699800	5537700	6566300	11887000	6041300	11606000	12641000	9137100	5364700	12830000	9528400	5289000	12886000	13419000	5765800	10134000	4029200	13176000	6015300	9849400	12883000	12312000	7638000	16961000	3266000	14385000	24340000
MEDN1271	LPE(0:0/20:2)	GP	LPE	504.311	505.317	[M-H]-	C25H48NO7P	572330	700980	249280	867280	695000	835380	398200	472660	614760	589570	782280	1247600	532790	469570	398510	421270	685750	433040	851840	244970	407750	976530	240460	165460	639780	478780	273910	648970	456760	442230	377530	291250	364370	208830	774970	1348200	1312700	981250	1402200	314320	601530	854440
MEDN1272	LPE(20:2/0:0)	GP	LPE	504.311	505.317	[M-H]-	C25H48NO7P	572330	700980	249280	867280	695000	835380	398200	472660	614760	589570	782280	1247600	532790	469570	398510	421270	685750	433040	851840	244970	407750	976530	240460	165460	639780	478780	273910	648970	456760	442230	377530	291250	364370	208830	774970	1348200	1312700	981250	1402200	314320	601530	854440
MEDN1273	LPE(0:0/20:3)	GP	LPE	502.295	503.301	[M-H]-	C25H46NO7P	5218800	6039300	2516100	4938900	7250000	5786600	4130700	3243100	5222100	6192400	6218800	12970000	3146600	3864200	3260100	3886800	3035300	2328400	9473100	2408800	11317000	10579000	4062900	1293800	9092300	5916100	2186300	8933500	4749200	2671300	5734900	1640400	5412300	3200500	5366900	9795100	7641600	5199100	13864000	4503000	6053600	16148000
MEDN1274	LPE(20:3/0:0)	GP	LPE	502.295	503.301	[M-H]-	C25H46NO7P	5218800	6039300	2516100	4938900	7250000	5786600	4130700	3243100	5222100	6192400	6218800	12970000	3146600	3864200	3260100	3886800	3035300	2328400	9473100	2408800	11317000	10579000	4062900	1293800	9092300	5916100	2186300	8933500	4749200	2671300	5734900	1640400	5412300	3200500	5366900	9795100	7641600	5199100	13864000	4503000	6053600	16148000
MEDN1276	LPE(20:4/0:0)	GP	LPE	500.28	501.286	[M-H]-	C25H44NO7P	9587000	7799000	4122300	7549500	8278100	6808300	4563700	5993600	8750100	8519700	8479500	11510000	6208500	6409900	5818000	6702100	5537200	4654900	7132300	5635100	11595000	12006000	8092800	4005500	10525000	8444700	5479500	10233000	10278000	5874300	6984300	3871000	7375800	5200300	7482800	12048000	11135000	8039800	20910000	4970800	10203000	14931000
MEDN1277	LPE(0:0/20:5)	GP	LPE	498.263	499.27	[M-H]-	C25H42NO7P	2003900	1009000	1349000	1323000	3825000	2625900	619620	784110	965720	1158600	2475800	4500100	757950	2506600	1004200	4416800	1917500	1231300	2547900	628310	7109900	3459000	1056900	441660	1486600	454440	1342000	1752600	2480600	1251200	2209700	278370	794340	514310	2722100	6801100	1733200	805400	6827700	1233300	1546400	2576700
MEDN1278	LPE(20:5/0:0)	GP	LPE	498.263	499.27	[M-H]-	C25H42NO7P	2003900	1009000	1349000	1323000	3825000	2625900	619620	784110	965720	1158600	2475800	4500100	757950	2506600	1004200	4416800	1917500	1231300	2547900	628310	7109900	3459000	1056900	441660	1486600	454440	1342000	1752600	2480600	1251200	2209700	278370	794340	514310	2722100	6801100	1733200	805400	6827700	1233300	1546400	2576700
MEDN1279	LPE(0:0/18:0)	GP	LPE	480.309	481.317	[M-H]-	C23H48NO7P	8645200	5043400	4447700	9518100	7895700	7781600	7860200	5130900	10540000	8651500	8168700	9106700	5697300	5864600	5772500	8048200	7845700	4242100	16202000	3641300	8480700	11775000	5949300	2611200	10854000	8000600	4262800	9793900	7607400	3881700	5343200	3210300	5409100	4085200	10706000	9931400	9337900	8922200	24379000	7039700	10518000	15529000
MEDN1282	LPE(0:0/18:2)	GP	LPE	476.279	477.286	[M-H]-	C23H44NO7P	49022000	71336000	29180000	65588000	78702000	58187000	41997000	31347000	57355000	58548000	69402000	93173000	41255000	39110000	32440000	46925000	82658000	50640000	60830000	26043000	97300000	69763000	60322000	26866000	75610000	42017000	52963000	70729000	51448000	36295000	54994000	35365000	52005000	29225000	78655000	89051000	88243000	108100000	119160000	62263000	58189000	102070000
MEDN1283	LPE(0:0/18:3)	GP	LPE	474.264	475.27	[M-H]-	C23H42NO7P	4270400	2625300	9330600	2422900	14030000	11709000	2319700	2749000	2078600	2257800	2806800	8313200	1103400	2812800	1865400	7355100	7392300	7236400	5206700	626600	11829000	3352000	3200100	1153100	2998900	609470	4476600	2528800	4113100	1005800	2285600	1071800	1915800	719400	4544400	23979000	4554000	3553900	19760000	2269400	3667900	2552200
MEDN1284	LPE(18:3/0:0)	GP	LPE	474.264	475.27	[M-H]-	C23H42NO7P	4270400	2625300	9330600	2422900	14030000	11709000	2319700	2749000	2078600	2257800	2806800	8313200	1103400	2812800	1865400	7355100	7392300	7236400	5206700	626600	11829000	3352000	3200100	1153100	2998900	609470	4476600	2528800	4113100	1005800	2285600	1071800	1915800	719400	4544400	23979000	4554000	3553900	19760000	2269400	3667900	2552200
MEDN1285	LPE(0:0/16:0)	GP	LPE	452.278	453.286	[M-H]-	C21H44NO7P	40914000	30044000	20960000	48112000	39394000	34719000	28018000	26320000	56210000	41633000	37380000	55481000	26043000	29699000	25796000	37451000	35365000	18649000	81179000	23633000	63348000	52990000	31588000	17425000	57595000	34160000	18453000	48118000	44450000	17075000	37711000	14190000	36440000	26240000	50067000	44676000	45424000	40300000	116150000	42628000	58917000	87562000
MEDN1287	LPE(0:0/16:1)	GP	LPE	450.264	451.27	[M-H]-	C21H42NO7P	674950	591990	272850	379370	935600	544720	198810	386180	379280	556970	827030	1811600	313030	397310	429780	668220	330520	205550	951150	260500	1905800	1980500	603940	230470	1384300	603400	284450	1523200	962300	331160	1230700	237290	760980	517830	978920	850500	976580	440880	1786300	958580	738630	1825000
MEDN1288	Glycine linoleate	GL	DG	336.254	337.262	[M-H]-	C20H35NO3	39504	44774	42875	111780	42056	34043	42834	53260	45917	36374	89560	48666	41008	48932	45393	37603	57311	50500	53662	34506	26222	45618	47768	34623	70472	84859	37025	67089	60549	38533	71518	54214	90690	42083	65308	74210	63699	67689	95682	26492	80874	139500
MEDN1299	1-Aminocyclohexanoic acid	Organic acid And Its derivatives	Organic acid And Its derivatives	142.087	143.095	[M-H]-	C7H13NO2	50469	60356	45804	38720	56058	37936	35455	32523	54380	50112	52903	53595	40758	41470	35787	33745	42361	34505	42999	24986	23884	30881	49071	15276	36967	44162	40089	65885	71211	37123	40181	20934	20464	35384	57679	43617	45636	32432	34732	17177	69602	53361
MEDN1311	2-Hydroxycaprylic acid	Organic acid And Its derivatives	Organic acid And Its derivatives	159	160.21	[M-H]-	C8H16O3	102180	55267	109660	506580	141110	90647	122520	80294	288230	92600	109600	160980	79862	70131	61353	72594	188310	143460	73452	80649	57588	47913	99306	45677	111410	255480	184340	104830	94836	139070	64612	47467	142010	62097	134680	146890	120160	252330	79708	102270	56799	50814
MEDN1312	2-hydroxyphenylacetic acid	Organic acid And Its derivatives	Organic acid And Its derivatives	151	152.047	[M-H]-	C8H8O3	16279	21871	10813	29814	43498	20033	18248	23098	18147	35531	19297	44098	17262	39930	24989	20909	13954	30089	32711	19664	8319.2	8053.3	63217	12357	18072	52348	28069	34032	45301	23105	23153	11940	12493	18694	28414	60203	40461	58235	23839	9474.7	36415	34642
MEDN1315	4-Hydroxy-3-methylbenzoic acid	Organic acid And Its derivatives	Organic acid And Its derivatives	151	152.047	[M-H]-	C8H8O3	16279	21871	10813	29814	43498	20033	18248	23098	18147	35531	19297	44098	17262	39930	24989	20909	13954	30089	32711	19664	8319.2	8053.3	63217	12357	18072	52348	28069	34032	45301	23105	23153	11940	12493	18694	28414	60203	40461	58235	23839	9474.7	36415	34642
MEDN1320	2-Hydroxy-2-Methyl Butyric acid	Organic acid And Its derivatives	Organic acid And Its derivatives	117	118.063	[M-H]-	C5H10O3	1061700	2211800	834930	537720	1698400	830140	753420	388370	1213700	1058200	1413900	1022700	607880	632510	472220	668710	582480	976710	616240	291330	746920	2142400	873060	334590	686690	1085900	594920	2906100	814450	454340	844310	277350	624980	582160	2127200	1509700	1710700	589370	780950	355750	1313100	1186600
MEDN1326	2-Methylglutaric Acid	Organic acid And Its derivatives	Organic acid And Its derivatives	145	146.058	[M-H]-	C6H10O4	7880.3	7373.9	9631.9	5100.3	11561	4897.8	12650	7044.9	4994.5	5949.1	9113.1	13083	5622.7	5221.5	7491.4	5518.8	6861	8982.8	6344.6	5842.4	5416.1	5556.3	3283.6	8376.2	7977.1	10189	17035	9926	9179.5	7158.3	9183.7	5118.5	14353	2050.9	9407.3	24414	8991.7	4533.5	5093.7	11842	3859.3	9100.6
MEDN1327	2-Methyl-4-pentenoic Acid	Organic acid And Its derivatives	Organic acid And Its derivatives	113	114.14	[M-H]-	C6H10O2	1132700	1188300	1122300	1215800	1243500	1261400	1210400	1244800	1140800	1273600	1227300	1112400	1343800	1176000	1215200	1179600	1192100	1181900	1221400	1208400	1150000	1249500	1089400	1074000	973240	880940	960790	807680	951300	913410	807300	1004300	935070	935370	1025800	1000800	936710	1153700	963040	987540	889840	964290
MEDN1328	(S)-Leucic acid	Organic acid And Its derivatives	Organic acid And Its derivatives	131	132.079	[M-H]-	C6H12O3	144000	180330	59129	33694	101590	78732	109160	29045	91905	66732	83343	82165	47760	100680	56682	55772	84104	108550	36202	45568	39066	54973	51794	24472	47921	100680	44091	219840	109030	81837	72099	36205	50747	95475	135840	109780	77338	58665	59398	53031	101800	134710
MEDN1329	Glycohyodeoxycholic acid	Bile acids	Bile acids	448	449.314	[M-H]-	C26H43NO5	116160	41235	107770	11901	103000	40854	201670	14832	138460	129260	37744	84100	52467	17334	197680	10935	80631	56013	266060	6472.2	8781.6	132100	11239	130190	25763	180520	81782	171700	46292	26098	143810	26568	26726	64700	220480	49350	111850	55881	252410	47983	42688	22675
MEDN1338	2-Hydroxy HippuricAcid	Benzene and substituted derivatives	Phenolic acids	194.045	195.053	[M-H]-	C9H9NO4	136530	37913	21286	266110	67528	59044	81312	40263	34507	20217	313190	67348	101870	54731	50780	36322	35006	65741	190870	24290	25529	32847	10174	23986	25643	177240	22385	22117	24931	18295	23266	20315	43506	18163	82823	25181	43784	275010	40913	19909	36860	143860
MEDN1394	3-Hydroxybenzoic Acid	Organic acid And Its derivatives	Organic acid And Its derivatives	137.025	138.032	[M-H]-	C7H6O3	33300	49874	79381	54768	34204	51343	46830	48135	39167	81057	34293	27529	23927	74482	36118	62010	53622	57048	46913	40372	28373	68879	58686	36712	66666	41478	38562	78148	50203	56282	66837	86744	59389	54278	64168	5402.6	59177	40205	52202	49521	35746	35024
MEDN1398	8-Aminooctanoic Acid	Organic acid And Its derivatives	Organic acid And Its derivatives	158.119	159.126	[M-H]-	C8H17NO2	277940	305970	285670	244960	300560	228280	287070	244460	295360	315200	294380	329340	287580	262540	256120	266990	271970	229760	292680	241600	199170	242280	316790	188240	265490	258970	269090	354810	308900	289670	302740	221630	218150	267860	345660	286600	299270	245290	229480	209760	360960	324080
MEDN1400	4-Methoxysalicylic Acid	Organic acid And Its derivatives	Organic acid And Its derivatives	167.04	168.042	[M-H]-	C8H8O4	12292	11209	12914	192370	44322	19896	88277	2385	94262	68237	15500	1921.6	23696	66337	21613	19874	46505	21650	15272	10272	2568.7	17631	10564	27360	34578	30259	22222	25264	12282	7439.2	626.8	9215.6	43632	6136.1	433.78	9139.3	5758.1	1017.2	52584	18022	32162	70408
MEDN1406	Tridecanedioic acid	FA	FFA	243.161	244.167	[M-H]-	C13H24O4	624640	599620	600050	767930	682070	663790	667320	700360	589690	583420	711540	728550	664680	709170	646600	719300	682620	716630	778920	679830	731690	739890	663770	718440	679510	786460	733640	800680	691010	705430	716120	786080	841900	773550	822740	839660	789830	764860	835560	898680	783010	814400
MEDN1409	12-Hydroxyoctadecanoic acid	FA	FFA	299.261	300.266	[M-H]-	C18H36O3	32963	43938	52941	35393	36298	25162	26152	18565	54332	20769	28645	32080	33967	23402	33293	39322	17500	31222	35043	43871	21237	50087	45072	20120	41170	62961	30779	53778	58185	26554	65838	20626	74359	54503	45174	62429	25928	44184	39087	16765	52481	313820
MEDN1410	N-Palmitoylglycine	Amino acid and Its metabolomics	Amino acid derivatives	312.256	313.262	[M-H]-	C18H35NO3	48666	47701	55653	83378	67984	51350	69404	61065	101770	61127	83153	69795	68674	73627	71306	67419	65916	65026	85075	56971	49826	63009	80747	56370	51807	113040	65150	129440	135440	65830	123950	56437	141950	66633	82262	123130	87984	66326	131670	47598	104670	219890
MEDN1413	Taurolithocholic acid	Bile acids	Bile acids	482.298	483.302	[M-H]-	C26H45NO5S	3469000	1658800	804200	853930	2298500	1012100	1290900	1245700	4758300	1976200	8709700	3832000	2339600	1972900	5755500	344360	3286500	986940	1331200	220660	1532800	2828900	1604600	1397300	3105100	19180000	1079100	5356100	1661800	3482900	2499900	3025500	212680	514280	2609800	9466100	802380	2262700	1795000	454290	1005400	1675200
MEDN1414	12-HHT	FA	Oxidized lipids	279.198	280.204	[M-H]-	C17H28O3	29407	18001	5156	17778	35540	20391	18940	11434	21903	25576	20360	9571.8	23872	11862	18141	11615	24088	9947.4	8830.4	8735.3	8092.1	10914	38219	10957	17109	9528.1	14128	19423	1897.2	234.63	7038.9	14217	58492	9997.7	27683	68756	17552	19454	9715	9781.7	18678	62766
MEDN1415	13(S)-HOTrE(γ)	FA	Oxidized lipids	293.212	294.219	[M-H]-	C18H30O3	10422	10862	10654	11167	8887.8	6836.9	7625.9	9800.5	9185.5	12451	7887.6	3762.8	6567.7	9056	8744.7	9292.2	7884.4	7538.7	10818	7228.9	10154	10323	1237.7	6706.4	5940	7648.7	11893	10742	9441.1	4282.7	10872	12714	9168.8	8838.3	10103	10634	8167.7	13342	11085	7429.3	8313.9	10068
MEDN1416	9(S)-HOTrE	FA	Oxidized lipids	293.212	294.219	[M-H]-	C18H30O3	6759.2	4990.4	14462	5412.9	6886.9	11827	5787.1	5412.6	10975	2079.7	4242.7	5364.7	4355.7	6153.8	4322.9	8637.1	10012	12289	5754.2	3360	4646.2	10079	5314	4921.4	9996.9	6110	9005.5	9191.7	8480.9	3111.9	11238	2521.9	15879	5672.5	6535.6	13713	5534.8	4919.9	9630.9	7644.3	6248.4	7507.8
MEDN1421	(±)8-HETE	FA	Oxidized lipids	319.23	320.235	[M-H]-	C20H32O3	46602	47209	15481	31886	36273	34867	58694	23656	77599	23854	36614	28440	53141	37818	39414	45281	75537	17581	14969	12586	18081	11510	37270	8187	10568	26228	14481	50778	36370	39904	34618	18065	44810	12049	55149	29535	18918	64584	5758.4	32884	27022	86507
MEDN1422	8(S)-HETrE	FA	Oxidized lipids	321.245	322.251	[M-H]-	C20H34O3	16186	18487	4604.7	12214	16677	15388	20752	4341.9	25881	8627.1	12992	10951	11915	13724	14696	15183	23141	7607.4	5504.9	7449.3	4561.9	5667.7	9004.9	4378.3	5658.4	16028	6094.8	29106	10171	11598	14613	6883.7	24328	8425.1	22327	20566	5723.2	18656	2543.9	12523	7694.5	35102
MEDN1423	15(S)-HETrE	FA	Oxidized lipids	321.245	322.251	[M-H]-	C20H34O3	16186	18487	4604.7	12214	16677	15388	20752	4341.9	25881	8627.1	12992	10951	11915	13724	14696	15183	23141	7607.4	5504.9	7449.3	4561.9	5667.7	9004.9	4378.3	5658.4	16028	6094.8	29106	10171	11598	14613	6883.7	24328	8425.1	22327	20566	5723.2	18656	2543.9	12523	7694.5	35102
MEDN1426	9(S),12(S),13(S)-TriHOME	FA	Oxidized lipids	329.233	330.241	[M-H]-	C18H34O5	39910	25143	24391	22113	42615	32121	35773	24269	36946	25486	58550	26165	18454	26428	33838	37574	44036	32950	23391	16966	20861	31792	17383	17223	76864	48791	31390	68170	17050	38886	31110	21736	34293	30035	28739	77990	23597	37619	27818	41159	29287	49721
MEDN1428	20-COOH-AA	FA	Oxidized lipids	333.207	334.214	[M-H]-	C20H30O4	46174	58569	37530	53068	63789	47547	21147	48474	80955	53190	77795	72992	35833	40529	26875	30787	46093	38516	99855	30259	52766	20285	51827	33428	40055	36396	37262	72161	52063	45103	47942	17115	95505	24061	46663	70258	53274	61946	39786	38509	102340	42583
MEDN1438	(±)8(9)-DiHET	FA	Oxidized lipids	337.24	338.246	[M-H]-	C20H34O4	7215	6582.8	8087	6107.1	5498.6	4782.8	7637	9841.9	8577.2	8305.4	7756.7	7186.4	6791.4	5244.1	5117.4	6109.8	5907.8	6746.5	5407.6	7414.2	7105.8	11717	8438.9	5163	7189.4	14304	6282.1	12085	11742	10624	17772	5417.8	15155	8236.4	4915.2	14231	9145.3	6869.1	6444.2	5238.4	10737	12740
MEDN1439	(±)11(12)-DiHET	FA	Oxidized lipids	337.24	338.246	[M-H]-	C20H34O4	7215	6582.8	8087	6107.1	5498.6	4782.8	7637	9841.9	8577.2	8305.4	7756.7	7186.4	6791.4	5244.1	5117.4	6109.8	5907.8	6746.5	5407.6	7414.2	7105.8	11717	8438.9	5163	7189.4	14304	6282.1	12085	11742	10624	17772	5417.8	15155	8236.4	4915.2	14231	9145.3	6869.1	6444.2	5238.4	10737	12740
MEDN1441	10-HDoHE	FA	Oxidized lipids	343.228	344.235	[M-H]-	C22H32O3	15536	12733	3536.6	10608	11630	10291	14502	6717.5	37583	5652.5	8549.4	10263	14336	25314	9242.6	17823	15094	8208.6	9785.5	4646	2789	7360.6	9180.9	5083.6	5860	10556	5045.4	18846	12046	10764	11269	5697.8	17060	2840.5	13492	13736	3250.9	15411	2774.7	8628.6	13348	39882
MEDN1442	8-HDoHE	FA	Oxidized lipids	343.228	344.235	[M-H]-	C22H32O3	16173	17590	6118.1	14692	15638	11651	13367	8249.8	52614	4036.8	12179	14334	16546	29121	10455	16348	19254	13731	11240	7096.9	4955.9	10625	8730.4	4580.5	8075.5	9906.4	5283.4	26208	13747	12624	14293	6871.3	20994	5049.8	19017	14407	4902.5	18643	2340.5	7622.2	15563	44696
MEDN1443	11-HDoHE	FA	Oxidized lipids	343.228	344.235	[M-H]-	C22H32O3	35893	42680	13056	27588	34534	36085	38399	20086	113950	14788	29435	34026	43471	77391	29479	39299	51467	30968	19044	11819	12873	19732	26003	11540	16060	23220	10945	64685	31962	27655	30255	16882	48082	14058	40602	34117	8637.7	40148	7793.8	16986	32544	99163
MEDN1444	16-HDoHE	FA	Oxidized lipids	343.228	344.235	[M-H]-	C22H32O3	11307	13568	4534.7	7559.6	10767	8995	9905.9	6462.9	36314	3557.1	8620.8	9621.5	10593	23564	7825.3	11043	16303	9418.9	6514.5	2436.3	3376.1	5893.8	7837	2846.6	4082	6203.4	2542.2	14947	9158.7	7428.7	10978	6595	12734	3526.4	13496	9304.1	4606.7	10406	1267.1	3286.4	11833	35469
MEDN1445	20-HDoHE	FA	Oxidized lipids	343.228	344.235	[M-H]-	C22H32O3	2129.6	2780	655.89	1894	3116.7	2157.2	4729.3	1938.4	5833.6	1381	1507.1	2868	2840.3	5334.1	4734.8	4349.3	3820.9	2928.7	2404.8	2591.2	1626.6	1300.9	1344	995.2	2181.3	1413.2	776.63	4774.7	2800.4	2429.8	2960	1924.1	1845.4	74.5	4336.3	3062.2	1877.8	3915.5	295.46	372.1	3291.5	8128
MEDN1446	11-HEDE	FA	Oxidized lipids	323.5	324.266	[M-H]-	C20H36O3	14527	13117	3438.1	10183	16521	9312.8	14208	5941.6	19219	9676.3	14232	6015.4	15525	8419	11661	9593.4	16656	6035.6	7083.9	4034.5	4994.5	5786.7	13119	7102.6	9475.5	6945.9	7110.9	15783	4263.9	1189.4	10454	5487.5	48574	6853.7	21110	30809	9146.2	19459	5227.4	10174	9669.1	46888
MEDN1447	15-HEDE	FA	Oxidized lipids	323.5	324.266	[M-H]-	C20H36O3	14527	13117	3438.1	10183	16521	9312.8	14208	5941.6	19219	9676.3	14232	6015.4	15525	8419	11661	9593.4	16656	6035.6	7083.9	4034.5	4994.5	5786.7	13119	7102.6	9475.5	6945.9	7110.9	15783	4263.9	1189.4	10454	5487.5	48574	6853.7	21110	30809	9146.2	19459	5227.4	10174	9669.1	46888
MEDN1452	11β-Prostaglandin E2	FA	Oxidized lipids	351.219	352.225	[M-H]-	C20H32O5	64249	10236	4736.3	81568	191720	40686	11212	106050	40379	2040200	245580	90017	340670	46546	888070	10828	685970	80524	520960	315760	8994.1	45791	12732	8554.5	18783	3669400	138200	9262400	28735	107910	22225	96831	244310	337430	23584	278680	463160	45215	1360700	79568	34517	24850
MEDN1463	(±)19(20)-DiHDPE(A)	FA	Oxidized lipids	361.24	362.246	[M-H]-	C22H34O4	3512.2	5317.1	4671.7	6892.7	6473.7	2557.2	2669.8	2911.4	9877	2273.5	9514.6	6219.7	3289.6	3809.4	3738.1	1532	2065	8185.8	9471.1	2028.3	5747.7	1613.6	3072.9	3504.3	3409	3423.3	5877	10933	4288.8	5754.4	6177.4	1481.5	5304.3	2760.6	8494.7	11937	4884.6	6622.7	4103.5	2148.1	6646.8	10136
MEDN1475	Sorbitol 6-phosphate	Carboxylic acids and derivatives	Phosphate sugars	523.082	262.045	[2M-H]-	C6H15O9P	86012	67532	56726	60552	68032	78149	60880	40463	70105	50936	76151	70658	52942	106680	80014	76412	70186	77570	40318	75238	38038	46236	39328	34506	46946	75497	56802	77504	63648	76598	79089	59418	69635	87563	78064	78932	55711	70586	51497	52588	37106	79984
MEDN1478	Glu-Gln	Amino acid and Its metabolomics	Small Peptide	274.104	275.112	[M-H]-	C10H17N3O6	274500	377530	362320	265420	495520	389580	172180	350460	220600	383170	294890	425700	206280	269320	234150	361020	179740	372520	212190	420030	904320	138300	519790	606700	360550	337400	404780	307510	393950	407170	479060	418810	588180	472690	247660	545720	647770	242640	949660	309040	448850	290380
MEDN1480	N-Arachidonoyl-L-Alanine	Amino acid and Its metabolomics	Amino acid derivatives	374.267	375.277	[M-H]-	C23H37NO3	1480.5	3143.8	2209.4	2825.3	2252.2	2637.9	2647.6	2043.7	2522.2	2196.7	4375	3290.1	1371.4	1610.1	1576.4	2420.9	1473.4	1249.9	2204.3	1681.5	2048.5	2828.1	1562.5	1220.5	1765.2	5942.7	1457.3	4057.9	2882.2	1515.9	2575.9	1467.5	3304.9	2308.8	2040.2	3213.5	3940.7	1079	3719.4	1668.3	4587.3	6031.2
MEDN1484	Ethionamide	Heterocyclic compounds	Pteridines and derivatives	165.041	166.056	[M-H]-	C8H10N2S	10568000	10745000	10604000	10346000	10429000	11274000	12234000	12261000	12355000	8931800	9835000	11375000	10695000	11477000	10805000	12474000	9842000	9819600	9859200	10325000	10589000	11681000	12354000	10827000	9017100	10558000	10153000	10959000	11214000	10176000	11192000	11686000	9955500	10569000	11103000	11635000	11262000	10237000	13957000	15334000	10584000	9790600
MEDN1485	Glycerophospho-N-Arachidonoyl Ethanolamine	GP	LPE	500.277	501.285	[M-H]-	C25H44NO7P	9796900	7796400	4300400	7697100	8619500	6991300	4606400	6338200	9083900	8996100	8888800	11770000	6304000	6826000	5830400	6957600	5960000	4821000	7311100	5385800	12045000	12092000	7976400	4177700	10583000	8481900	5803900	10230000	10001000	5950000	7027100	3880300	7789400	5255200	7798100	12216000	11509000	8521500	20773000	5388600	10708000	15813000
MEDN1490	FFA(16:2)	FA	FFA	251.201	252.209	[M-H]-	C16H28O2	5226.4	5018.5	2961.3	4902.5	6582.3	5149.5	5412.5	6839.8	4688.1	2678.6	6995.7	6123.9	4343.7	5250.5	9707.4	5344.6	4390.8	4790.3	4909.3	6546.6	6167.8	6597.9	8796.1	5524.8	7396.9	4648	5145.3	5912.8	6737.9	6134.2	5791.1	5494.6	9134.1	6639.3	6648.5	8731.7	6142.3	8412.4	7338.5	7381.8	5306.3	5312.8
MEDN1492	(R)-(-)-Mandelic acid	Organic acid And Its derivatives	Organic acid And Its derivatives	151.041	152.047	[M-H]-	C8H8O3	7110.7	17942	7429.9	37333	24684	20313	10396	9470.6	9241.3	15290	12843	18100	11131	35588	15492	5418.5	11890	13926	16965	6256.1	11333	6472.3	32845	4143.5	8391.2	37058	9582.6	31217	22180	17272	11390	11523	9861.3	10597	23869	30727	9201.6	66263	7123.5	4577.9	11926	18343
MEDN1493	(R)-3-Hydroxybutanoic acid	Organic acid And Its derivatives	Organic acid And Its derivatives	103.041	104.047	[M-H]-	C4H8O3	356200	563440	421460	245660	436150	151780	330520	397060	1128800	314200	443610	335760	315340	325660	195400	310750	506870	1099600	268350	576070	309290	286080	256580	683960	335220	672140	265910	502330	645260	219830	858810	204450	2633400	307230	256260	820210	357030	641880	721720	107890	951070	930560
MEDN1496	2,6-Dimethoxybenzoic acid	Organic acid And Its derivatives	Organic acid And Its derivatives	181.051	182.058	[M-H]-	C9H10O4	26955	1929.9	2825.2	25856	3881.4	21875	68262	3544.9	10415	2396.3	64096	5031.6	3310.6	10190	2629	10313	6735.4	6075.5	8187.4	5110.8	2839.3	7317.8	2647.7	5207.5	5552.7	4910.4	3791.1	5447.5	20777	1634.6	4150	7831.6	6294.4	3026.2	2973.1	6662.7	6746.5	10617	4326.5	5795.7	3549.2	7271.9
MEDN1498	2-Hydroxyadipic acid	Organic acid And Its derivatives	Organic acid And Its derivatives	161	162.053	[M-H]-	C6H10O5	38808	51421	54333	17711	36446	10114	27785	36036	82996	20495	58128	25951	26350	33079	28792	20322	45015	117750	27714	57886	32269	25113	33120	71177	22033	59201	34453	50284	53460	15958	76076	17573	133710	44189	43836	64872	49933	51286	67483	4274.7	86905	83403
MEDN1499	2-Hydroxyhexanoic acid	Organic acid And Its derivatives	Organic acid And Its derivatives	131.071	132.079	[M-H]-	C6H12O3	28389	41398	65952	21831	31482	42170	159330	20539	971090	12162	31537	32712	98529	3470.4	968350	809080	556150	6521.5	62608	5979.3	27324	17593	21311	22041	36032	29951	21082	52115	16895	17860	55224	5920.8	191760	20737	56823	61286	34149	15676	68486	120580	23976	23003
MEDN1503	3-(4-Hydroxyphenyl)-1-propanol	Organic acid And Its derivatives	Organic acid And Its derivatives	151.077	152.084	[M-H]-	C9H12O2	685.78	2162.5	924.14	2759.9	2292.6	392.47	1194.5	2710.8	1281	2482.6	2017.4	1469.4	1777.1	4326.5	343.2	2596.5	587.09	2845.2	3082.6	1919.5	629.54	995.62	3600.7	567.1	1844.8	2403.4	1122.8	2437.4	3305.1	1259.2	2916.3	780.91	292.09	1083.6	3142.3	2637	3195.2	4282.7	940.71	939.19	2482.6	1951.3
MEDN1508	3-Phenoxybenzoic acid	Benzene and substituted derivatives	Benzene and substituted derivatives	213.055	214.063	[M-H]-	C13H10O3	37022	32902	38933	61990	33344	55521	32861	34656	32537	38204	32204	40174	31492	41824	54949	36060	32788	31445	33073	35010	33057	33948	35668	30718	32427	37968	33382	39871	39996	34983	37294	37064	34002	35892	32510	42384	38535	36934	30725	39574	48317	32015
MEDN1512	5,6-Dihydrouridine	Nucleotide And Its metabolomics	Nucleotide and Its metabolomics	245.079	246.085	[M-H]-	C9H14N2O6	80614	62285	27030	63260	41901	55584	81874	60046	58518	52011	50824	57811	43411	92491	45281	47466	69577	62274	52035	68900	55601	73385	47860	50769	82677	80604	62756	56095	60845	72260	43388	68983	47357	70405	41560	51096	48886	54963	57889	60687	60448	65238
MEDN1513	5-Hydroxy-2'-deoxyuridine	Nucleotide And Its metabolomics	Nucleotide and Its metabolomics	243.062	244.07	[M-H]-	C9H12N2O6	1101800	1117800	674030	1109000	910210	751930	1218100	639740	1378400	1142600	1102700	805250	813980	1118000	793040	879200	1170900	746130	961620	953930	492360	461830	908710	357140	656660	1303900	724330	1496800	1093200	656520	635380	569220	867150	551220	1112600	991960	760800	892530	698130	741410	1102200	1199000
MEDN1518	Acetylvaline	Amino acid and Its metabolomics	Amino acid derivatives	158.084	159.09	[M-H]-	C7H13NO3	33815	241820	29603	33670	39966	32815	38408	40227	44682	31824	35326	45643	28459	32319	27893	36676	34752	26607	34379	27904	23851	22044	35583	18583	22603	26124	24952	45755	44794	29898	26506	20931	31107	32885	40126	42498	41623	28297	36522	12311	35376	37116
MEDN1527	Cyclo(his-pro)	Amino acid and Its metabolomics	Small Peptide	233.104	234.112	[M-H]-	C11H14N4O2	113970	219830	137450	177690	144430	172790	70044	270310	223520	376030	212900	180840	90951	277350	198860	81759	387970	273330	382760	245190	152440	113540	255530	419860	271040	423220	256620	277610	125540	282640	199690	383260	186510	307890	283730	259500	74676	418040	388820	315590	161840	130710
MEDN1532	D-Galacturonic Acid	Carboxylic acids and derivatives	Sugar acids	193.036	194.043	[M-H]-	C6H10O7	40709	65343	43351	46210	67888	53003	10958	60581	35121	48963	25503	83597	50251	46430	32575	36730	38023	41047	52268	31229	74006	44406	48873	34995	49813	79336	50485	39300	101770	31088	69067	36964	30103	18127	54477	86323	66860	31045	58822	38441	65765	76983
MEDN1534	D-Tagatose	Carboxylic acids and derivatives	Sugars	179.057	180.063	[M-H]-	C6H12O6	49270	49355	93223	76255	69577	60302	49480	82143	70505	76201	60730	67010	86257	68972	51117	51628	47991	39676	94927	49919	87269	68438	113870	75605	86620	76976	93045	63649	93933	66538	85221	68916	73905	57269	77412	78450	107660	73987	89098	81117	117700	85491
MEDN1538	GalactinolHydrate	Carboxylic acids and derivatives	Sugar alcohols	103.003	342.116	[M-H]-	C12H22O11	3515100	5914700	4693800	2339200	4364300	1417800	3304500	4382200	12292000	3261500	4411100	3514800	3133300	3442800	2059800	3164300	4988600	11716000	2888400	6012800	3450600	3164500	2584100	6986500	3424800	6927000	3195700	5253800	6908900	2297900	9457700	1938800	27221000	3121400	2415100	8222600	3801100	6552100	7666300	936650	9381500	9455100
MEDN1543	Gly-Gly	Amino acid and Its metabolomics	Small Peptide	131.047	132.053	[M-H]-	C4H8N2O3	1611.8	1625.2	5956.5	3766.3	4309.8	5934.6	2699.7	1611.5	7501.8	4320.5	5908.4	2186.5	2690.8	3770.5	539.13	2163.3	2150.8	4301.9	1080.2	7534.2	539.29	1620	4315.1	1611.8	4295.2	3783.6	2158.8	4276	7082.1	2144.1	2700.5	1620	3778.3	2698.9	9226.4	5445.3	5386.3	5897.9	2158.8	539.29	2684	3207
MEDN1548	Val-Ala	Amino acid and Its metabolomics	Small Peptide	187.097	188.116	[M-H]-	C8H16N2O3	210230	197560	151450	180490	402750	197240	191320	198250	308690	205360	266130	289210	213890	249710	186070	195960	201370	242920	228580	177250	215370	237020	213180	185620	253900	343230	218200	243890	235430	234770	198250	189910	205590	179230	245860	423440	193600	286050	216820	294940	424430	591390
MEDN1554	Isethionic acid	Organic acid And Its derivatives	Sulfonic acids	124.996	125.999	[M-H]-	C2H6O4S	1185900	1546200	1275400	1023300	1775800	1197000	1203100	973760	1445100	1220900	1472400	1196000	1096200	1545900	1006500	1299700	1245900	1228800	1273300	965570	872460	926030	1147200	726700	978150	1302100	1177000	1440900	1429000	1110500	1319400	932760	1584800	949960	1710500	1490400	1167000	1435700	962330	920650	1284600	1484600
MEDN1559	Pro-Gly	Amino acid and Its metabolomics	Small Peptide	171.084	172.085	[M-H]-	C7H12N2O3	59911	43750	69168	54583	37596	54658	64352	52956	63549	65260	38036	67709	60605	82265	86897	73385	82010	79207	65945	50795	68936	81113	88760	61392	59302	56006	67584	53413	54512	71982	71554	83038	44405	52008	68255	46586	43804	57491	103780	69147	72198	47758
MEDN1566	Octadecanedioic acid	Organic acid And Its derivatives	Organic acid And Its derivatives	313.243	314.246	[M-H]-	C18H34O4	716610	1096000	1247800	443580	764980	467990	707590	831860	1004000	431560	1000200	908780	723880	435410	568620	456770	1540000	979170	572770	986400	663970	1167000	610120	392840	681590	1158100	1035100	993280	1043600	462100	935010	393430	1517800	839740	541750	1042400	934960	1182600	624010	323520	1213400	1703600
MEDN1567	Phosphonoacetic acid	Organic acid And Its derivatives	Phosphoric acids	138.554	139.987	[M-H]-	C2H5O5P	18816	25382	9279.1	4395.2	10283	11216	6135.7	10100	16428	13314	16353	12889	16330	17872	13734	6671.8	7915.6	16521	19209	9627.6	5461.1	12192	4094	7036.7	5626.3	4990.2	5219.1	12807	13999	4926.8	7909.4	12085	6053	3923.1	6907.7	11156	19947	13040	8972.8	19901	14037	17623
MEDN1581	Taurohyocholic acid	Bile acids	Bile acids	498.195	515.292	[M-H-H2O]-	C26H45NO7S	167390	92604	76297	89811	120540	85851	108470	84782	235970	119310	240430	154000	119430	124420	173940	77259	143890	100160	98444	77448	86524	102600	92629	128160	135970	312690	123150	158400	107600	141020	110710	140280	76141	89045	154060	226030	93140	119320	122660	87183	100730	124980
MEDN1589	Traumatic acid	Organic acid And Its derivatives	Organic acid And Its derivatives	227.129	228.136	[M-H]-	C12H20O4	26879	17810	22924	122210	31203	29776	51159	25541	53313	35940	64237	27395	41701	13035	19326	67089	16681	23420	18405	22341	14821	20173	8001	17980	21934	26710	32693	21345	74047	23102	46358	76854	73135	14868	33354	41179	21337	24506	25766	30259	41860	68738
MEDN1595	Xanthosine-5'-monophosphate	Nucleotide And Its metabolomics	Nucleotide and Its metabolomics	363.035	364.042	[M-H]-	C10H13N4O9P	10827	17818	14248	14147	8299.6	13274	8038.3	10021	6000.5	12560	7203.5	10512	7713.9	12976	12506	7504.8	17284	7288.7	23427	17969	13050	10712	9399.2	14703	9793	16437	4540.4	5542	14248	9848.3	9385.9	25301	7577.4	8168.2	15864	17001	10658	12087	20391	8397.9	5532.9	8081.5
MEDN1597	Phosphatidylethanolamine lyso alkenyl 16:0	GP	LPE	436.247	437.6	[M-H]-	C21H44NO6P	160330	147230	85354	171860	123820	115600	119670	135360	270760	149190	132530	150880	143740	151870	120290	133610	152000	102410	279410	123530	121660	194650	120390	63793	135300	197980	86496	177410	165740	106330	108070	86299	130020	79870	162590	195870	195440	205340	190470	141070	231240	207840
MEDN1600	LPA(16:0/0:0)	GP	LPA	409.236	410.243	[M-H]-	C19H39O7P	1936700	1945600	1462300	1854800	2206600	1737000	1965800	1656500	2845600	2232700	2056100	2220900	2156500	1789500	1619500	1612600	1680900	1314400	4931400	1817000	2019100	2689600	1811000	1004700	2474600	3228200	1656100	2944400	2431500	1131900	1719900	978650	1933900	1070900	2253500	2302800	2538000	2751400	1680800	1724300	2904500	3840200
MEDN1602	3-Deoxyguanosine	Nucleotide And Its metabolomics	Nucleotide and Its metabolomics	266.089	267.097	[M-H]-	C10H13N5O4	78566	43509	28778	48933	39207	39189	48584	43862	46343	66389	44125	37503	33018	57509	43750	41363	52026	34133	66958	34380	31985	40669	49665	14710	41175	68044	52863	77717	42749	28895	40770	49118	54812	46164	68373	37483	45461	64326	38023	19734	58502	46865
MEDN1604	3-hydroxy-tetradecanoic acid	Organic acid And Its derivatives	Organic acid And Its derivatives	243.195	244.204	[M-H]-	C14H28O3	192330	108330	191380	112700	117330	92704	124550	78583	616590	90409	180830	136140	168180	208810	94119	151210	122670	200160	133990	186610	73906	201590	173720	166880	126370	320840	78995	474030	134540	77196	352760	112810	385300	87437	124630	176440	217850	136360	227190	77946	192900	550890
MEDN1620	Glu-Val	Amino acid and Its metabolomics	Small Peptide	245.114	246.122	[M-H]-	C10H18N2O5	384030	355500	257510	290250	467230	268840	482550	258870	373670	547010	408840	455310	217670	296720	252180	292240	268460	396280	396250	271470	248320	469900	388330	124540	437170	942260	290870	671320	483580	384040	386380	178860	319920	419570	406080	450530	380560	331100	254520	179520	444520	577420
MEDN1624	N-Acetyl-5-aminosalicylic acid	Benzene and substituted derivatives	Phenolic acids	194.046	195.053	[M-H]-	C9H9NO4	4139.1	6850.8	8058.4	10250	5385.1	3229.4	3226.4	8291.5	7552.7	6196.2	6927.2	6842.4	6057.3	6836.7	5740.2	4315.1	5471.2	6321.5	6646.7	2762.2	2513.4	3374.9	3428.6	4686.8	5935.6	1884.1	5042.6	10758	8150.7	4603.7	5874.8	2318.8	9266.1	10989	3772.3	3059.6	7572.3	1975	6896.5	2416.5	7473.2	6946.1
MEDN1640	Glu-Tyr	Amino acid and Its metabolomics	Small Peptide	309.113	310.116	[M-H]-	C14H18N2O6	154030	152790	144460	153410	143410	125840	147040	143390	157210	164640	160520	153240	142110	160880	155000	147150	138920	126240	158170	123860	114300	131300	155250	105340	136580	160880	120430	171420	156740	116570	143810	110330	132860	148880	182700	152210	123730	155740	135580	131900	163480	154510
MEDN1643	LPA(18:1/0:0)	GP	LPA	435.249	436.259	[M-H]-	C21H41O7P	80971	79860	50560	75988	74375	50285	57887	65982	98107	60268	53427	62475	67061	53476	52465	41859	52732	51355	117750	35992	60575	132140	55557	28164	79633	94502	61008	77529	71128	52933	53486	26834	54113	41262	70223	89899	87256	117440	128580	58203	92808	98461
MEDN1652	D-Allose	Carboxylic acids and derivatives	Sugars	179.057	180.063	[M-H]-	C6H12O6	49270	49355	93223	76255	69577	60302	49480	82143	70505	76201	60730	67010	86257	68972	51117	51628	47991	39676	94927	49919	87269	68438	113870	75605	86620	76976	93045	63649	93933	66538	85221	68916	73905	57269	77412	78450	107660	73987	89098	81117	117700	85491
MEDN1656	Hydroxypiperazic acid	Heterocyclic compounds	Heterocyclic compounds	145.099	146.106	[M-H]-	C5H10N2O3	316040	364140	310570	343490	388150	476440	280940	256160	372180	357250	335970	445830	247410	382560	348580	366490	361110	354270	284310	312180	392280	186940	330680	345400	255950	244210	325640	350100	364290	425540	380450	324280	368880	400250	394610	424710	457510	392970	435940	388500	317870	361230
MEDN1662	Galactitol	Carboxylic acids and derivatives	Sugar alcohols	181.071	182.17	[M-H]-	C6H14O6	11225	8521.6	9404.2	12153	19403	18150	15719	6786.5	14474	11093	12261	10187	14938	7821.4	4986.5	14414	11936	18318	12127	20488	18214	5586.1	9546.6	5532.1	7769.6	14643	22562	22721	17304	9000.6	11225	15454	8674.8	8982.1	24660	10549	12234	21460	12182	16126	7087.9	13273
MEDN1666	N-Acetyglutamic acid	Amino acid and Its metabolomics	Amino acid derivatives	188.056	189.064	[M-H]-	C7H11NO5	2338700	3252800	1339900	1627000	2510000	2294400	2514800	1505300	2798800	2004700	3029800	2052500	1266700	2816900	2364100	2087900	3108800	2508300	1731200	2118300	1267800	993410	1291500	709030	1005900	2410700	1509700	2321600	3045500	2315500	2334500	1180200	2053900	2239800	2490600	2210400	2421800	2087800	1665800	1624300	2283500	2352800
MEDN1675	2-Deoxyribose-5'-phosphate	Nucleotide And Its metabolomics	Nucleotide and Its metabolomics	213.017	214.024	[M-H]-	C5H11O7P	170900	111940	114310	169350	135100	91963	133290	102690	117130	207740	203490	175490	109270	128680	112010	164210	149720	141440	200880	124060	99297	106710	181080	82785	132590	121680	149030	232370	165080	124750	71440	107390	230160	145240	277710	165930	163000	171780	172490	117150	170600	169830
MEDN1686	L-threo-3-Methylaspartate	Amino acid and Its metabolomics	Amino acid derivatives	146.047	147.053	[M-H]-	C5H9NO4	1657300	1091500	716660	993350	1257700	963520	1820600	708460	1362600	904600	1124700	1067800	959330	1493000	1295900	1485200	1394400	1106900	1082500	899830	752240	1623000	1036600	617030	1506500	1962400	981480	1574200	1393500	1429100	1192600	957560	972620	1256700	1572600	941060	713560	1148300	487480	1045000	1009700	1359900
MEDN1688	FAHFA(8:0/10:0)	FA	FFA	313.239	313.238	[M-H]-	C18H34O4	45020	90732	61919	105180	164160	172080	60181	80860	594210	76398	69964	376760	184050	120090	63360	27977	87272	23205	90837	33865	23733	59686	71185	241040	161530	293780	69487	135040	86651	53308	39589	74824	102410	54471	67164	53589	66071	152830	60198	96647	238660	91968
MEDN1689	Leu-Ile	Amino acid and Its metabolomics	Small Peptide	243	244.33	[M-H]-	C12H24N2O3	56119	48932	47397	26354	58360	49906	64892	68414	49885	67600	52455	60684	15617	34981	59116	86863	21738	99972	19150	53414	39456	15432	95603	36987	137640	44406	101650	108000	112470	58555	34575	66747	78783	32595	46536	111460	57602	21679	33045	143130	18115	112510
MEDN1690	Docodiendioicacid	Organic acid And Its derivatives	Organic acid And Its derivatives	365.27	370.6	[M-H]-	C22H38O4	482250	512570	350560	469920	468120	506560	287550	578810	926010	457480	774150	248790	374980	660100	225350	341430	297860	596440	440210	278150	460810	151510	454910	346460	392310	356870	367310	558240	683120	511130	477910	300090	637960	263220	232530	530820	459890	430340	494920	348590	824560	580210
MEDN1691	His-Ser	Amino acid and Its metabolomics	Small Peptide	241.216	242.23	[M-H]-	C9H14N4O4	180890	290540	313470	364770	505890	369300	215300	167260	281840	385840	475610	281200	175960	583070	107430	175810	388880	427650	166550	88911	103210	230680	160270	140300	118400	149650	309310	72360	558800	372620	284890	132550	523990	79940	441770	581110	241140	268060	212950	258160	389110	190850
MEDN1692	Phosphatidylethanolamine lyso alkenyl 18:2	GP	LPE	460.28	460.283	[M-H]-	C23H44NO6P	383590	313160	106020	345990	397990	342670	165150	189730	460930	346290	436950	539470	330410	205940	153870	183650	412420	234920	454810	174440	383340	368290	260690	91385	267790	275390	274940	389070	299580	188060	188830	106490	185280	60460	333800	467170	556300	909940	569290	191030	396240	488660
MEDN1709	2-Octanamidoacetic acid	Amino acid and Its metabolomics	Amino acids	200.13	201.136	[M-H]-	C10H19NO3	21369	20630	19967	20910	19357	18040	21083	20992	20928	19215	18650	20387	15978	18298	21299	18017	16824	17028	21026	17456	19148	20791	21110	26385	20783	24284	15330	41763	23061	16850	26801	19820	28175	22414	24006	25034	28645	21023	35206	21378	24993	26643
MEDP0002	D-Homocysteine	Amino acid and Its metabolomics	Amino acids	136	135.035	[M+H]+	C4H9NO2S	135510	339660	286210	213800	230610	185300	139150	151700	376790	231740	155260	150540	157980	169250	209920	212080	196420	174050	258210	155850	117050	169350	191520	151230	148390	246410	204870	180550	394420	209420	200280	116770	160910	186770	224960	168520	172260	171590	128040	103570	264640	151730
MEDP0006	Glycine	Amino acid and Its metabolomics	Amino acids	76	75.032	[M+H]+	C2H5NO2	29007	19343	34339	36516	29332	33570	35118	27709	24070	26899	41631	38583	37441	28873	59763	34719	23642	36886	49008	16387	19230	23939	38143	37199	29820	38430	16354	21969	44241	17841	37290	58589	33158	18526	34167	28629	32936	38616	31139	60642	13305	17162
MEDP0009	L-Tyrosine	Amino acid and Its metabolomics	Amino acids	182.1	181.074	[M+H]+	C9H11NO3	81199000	95226000	83456000	86962000	75486000	76304000	69866000	67805000	97737000	87548000	100010000	80957000	69165000	81949000	77524000	70183000	87238000	81500000	67598000	59142000	52260000	76458000	65458000	68022000	68567000	88906000	76207000	102940000	77474000	76802000	83732000	55424000	62120000	88193000	109320000	65458000	82040000	86287000	64893000	58379000	85373000	92526000
MEDP0011	L-Lysine	Amino acid and Its metabolomics	Amino acids	147	146.106	[M+H]+	C6H14N2O2	28416000	31910000	21013000	20721000	24518000	15723000	22957000	15023000	25715000	26033000	22995000	23831000	16714000	21494000	18795000	20233000	20055000	16336000	20725000	18396000	15880000	15441000	21599000	13072000	16155000	22673000	19812000	30410000	27870000	25699000	19246000	15783000	17434000	22125000	19892000	20590000	21636000	15242000	13932000	13552000	24653000	26508000
MEDP0012	L-Ornithine	Amino acid and Its metabolomics	Amino acids	133	168.067	[M-Cl]+	C5H13ClN2O2	3633500	3424400	1922900	2370700	2742100	2396000	3011100	1383500	3059100	2556400	3332600	2634600	1873900	3595100	2490000	2146400	2672800	3423000	2280300	1862000	1997800	2207600	2371200	1142600	2066700	3244200	2097400	3941100	2825200	3118600	1821500	2206000	1193400	2710000	2789400	2505100	2488000	2684500	1797400	2461300	3204300	2240600
MEDP0013	L-Alanine	Amino acid and Its metabolomics	Amino acids	90.048	89.048	[M+H]+	C3H7NO2	2021200	2776300	1827600	2160000	3545500	2290600	2164300	1323200	1875300	1978800	2576000	2999300	1422300	1676200	1939500	2336300	1271000	1047100	2156200	1266400	2180900	1857900	1931000	1234600	1697100	2812900	1873700	2520300	2391300	1677700	1785800	1379800	1711300	1452200	2159300	1858800	1850400	1439100	1014700	1566900	1622000	2429000
MEDP0017	L-Histidine	Amino acid and Its metabolomics	Amino acids	156.1	155.07	[M+H]+	C6H9N3O2	22535000	19850000	14574000	15602000	19304000	15234000	17019000	14576000	15780000	17433000	17751000	14278000	14812000	22287000	14604000	15049000	14674000	19228000	16071000	12955000	11223000	16395000	14756000	15472000	18515000	17288000	12435000	15844000	15247000	15330000	16129000	15249000	14072000	17344000	15109000	13843000	13601000	11935000	17046000	17865000	15852000	17424000
MEDP0020	L-Methionine	Amino acid and Its metabolomics	Amino acids	150	149.051	[M+H]+	C5H11NO2S	2033700	3729500	3282200	4095200	4487400	2312200	372260	1701400	4127900	2716100	5432900	1296100	628690	861380	2718900	2954100	3865400	2903500	2469600	527260	1666900	1273500	4170500	877120	2158700	789480	3044700	5393900	4289500	2739600	1001800	2211200	3446800	3224400	1722400	3879100	3288800	1090500	3146000	1944200	3117400	4955300
MEDP0021	L-Phenylalanine	Amino acid and Its metabolomics	Amino acids	166.085	165.079	[M+H]+	C9H11NO2	371250000	368050000	388260000	363210000	368990000	392250000	385870000	356280000	399600000	361770000	357660000	346600000	392670000	366860000	352360000	365750000	379740000	336070000	357400000	373360000	348090000	342010000	356800000	338470000	334650000	347320000	363310000	361320000	371150000	365480000	383150000	321590000	363930000	373400000	349020000	365590000	351050000	347160000	311920000	339320000	374590000	360090000
MEDP0022	L-Proline	Amino acid and Its metabolomics	Amino acids	116.1	115.063	[M+H]+	C5H9NO2	46601000	60442000	45480000	43876000	75414000	55737000	47407000	36405000	37190000	61623000	79827000	65862000	39528000	52366000	43812000	52940000	45690000	64288000	37070000	26262000	72054000	36177000	35238000	26315000	52945000	53146000	60968000	72757000	52424000	50071000	65863000	31068000	47692000	34278000	92452000	57406000	66828000	34995000	46296000	45669000	40746000	65963000
MEDP0026	L-Valine	Amino acid and Its metabolomics	Amino acids	118.1	117.079	[M+H]+	C5H11NO2	62265000	91488000	66565000	53359000	101440000	60981000	69191000	70098000	75192000	77599000	66142000	97159000	56030000	52128000	63286000	71450000	60772000	58040000	82740000	52438000	51917000	59533000	79489000	44540000	52854000	89769000	65054000	97022000	80954000	66870000	59037000	47674000	78025000	59419000	77204000	79084000	58990000	69508000	47211000	40837000	64286000	69844000
MEDP0028	(5-L-Glutamyl)-L-Amino Acid	Amino acid and Its metabolomics	Small Peptide	219	218.09	[M+H]+	C8H14N2O5	117480	178670	181460	116360	305050	161840	91387	126730	121610	164990	116070	287210	75157	105150	110860	136140	49496	107250	110850	185120	288230	55436	183710	105530	186520	300470	249230	232360	163960	126810	171550	76456	188160	154100	79292	117750	307320	63619	158530	69321	161980	112710
MEDP0036	5-Oxoproline	Amino acid and Its metabolomics	Amino acid derivatives	130	129.043	[M+H]+	C5H7NO3	7209200	6735600	11577000	10603000	7821400	8860600	7133100	7165700	10284000	4036300	9270900	6410700	4544100	10077000	6799200	6429900	6456900	4962900	8199100	5023600	4860300	2243300	2704500	2910700	2467600	5486900	3424300	5284300	8393600	5064600	6900200	1536800	3825900	5139800	5581600	7252400	5145900	4010500	2991300	8078300	3649500	4048800
MEDP0045	Glyc-Pro	Amino acid and Its metabolomics	Small Peptide	173.2	172.085	[M+H]+	C7H12N2O3	119680	95723	131650	119710	137350	121280	111670	129550	112590	133280	119070	107840	88349	119470	130680	140710	120820	134220	121940	111490	127390	122890	147990	108070	145440	109920	145640	131490	151520	110130	139270	109130	116490	116360	101170	110810	89027	106800	97626	105800	101540	109720
MEDP0056	L-Homocystine	Amino acid and Its metabolomics	Amino acids	269	268.055	[M+H]+	C8H16N2O4S2	13167	8136.7	34027	17122	77628	13851	13940	21042	42589	24115	35659	41901	42542	16997	32563	27063	23948	46890	15379	9292	10839	13167	67805	31096	42438	33547	37846	14182	33781	12391	22621	8547.6	30973	24767	29012	41738	29051	19424	13681	7702.5	20269	15600
MEDP0067	N-Acetylmannosamine	Carboxylic acids and derivatives	Sugars	222	221.09	[M+H]+	C8H15NO6	9494.5	63890	22631	48276	46704	46614	54009	26933	36961	37538	66795	33492	36953	50570	29655	32060	32234	36324	27802	22640	67605	52196	28960	33033	38099	47362	22770	72736	35008	40789	31753	42830	27873	50398	28464	44543	25455	43708	31685	74970	69722	23882
MEDP0068	N-Acetylneuraminic Acid	Amino acid and Its metabolomics	Amino acid derivatives	310.1	309.106	[M+H]+	C11H19NO9	295550	22119	127780	279610	116170	1541500	336680	55156	690020	494890	1519500	24593	328930	350300	8964.6	275110	26815	19035	2292900	52830	109430	206270	11184	15768	32545	34677	38855	21274	1960200	11233	54846	9965.2	29232	57952	319880	383940	3803	18257	6809	299380	16567	704170
MEDP0075	Nα-Acetyl-L-Arginine	Amino acid and Its metabolomics	Amino acid derivatives	217.1	216.122	[M+H]+	C8H16N4O3	193260	206250	192390	263080	220180	188370	212280	180140	221910	191850	230440	234340	195690	195950	226540	222460	233630	244500	201010	181480	222110	198880	219020	223250	218990	185960	193330	183570	213940	211730	201180	166240	186850	196410	221370	199520	196630	159350	170830	193570	221380	219900
MEDP0077	Phenylacetyl-L-Glutamine	Amino acid and Its metabolomics	Amino acid derivatives	265.1	264.111	[M+H]+	C13H16N2O4	756040	10613000	1925600	4266900	14720000	7354000	2452000	12690000	5489700	11746000	1644900	22341000	5816200	4997200	3704600	2884200	3457800	5108700	4289400	4941500	10777000	2494000	5079300	3646400	1098200	6241500	5204200	3347600	6273300	12303000	3470000	1154500	11209000	4242800	3314700	6755900	4994900	4016900	1522900	1207900	2260300	13515000
MEDP0083	Trans-4-Hydroxy-L-Proline	Amino acid and Its metabolomics	Amino acid derivatives	132.1	131.058	[M+H]+	C5H9NO3	92559	145890	39902	113320	163760	58062	96794	78439	168900	177240	77957	184110	94066	73706	98560	62481	101480	154710	134220	145690	70527	96498	120690	93985	82165	410520	86974	144060	87453	191190	69527	86180	66420	28913	95904	101510	347020	209870	302200	93552	116020	71953
MEDP0084	Trimethylamine N-Oxide	Alcohol and amines	Amines	76	75.0684	[M+H]+	C3H9NO	41289	247190	81451	187110	95198	300430	346900	242110	189890	175430	124200	2311500	348220	124270	140200	91219	293330	104370	487630	41169	370340	54812	293280	52796	147440	76108	224600	171100	277810	224230	70790	70539	283490	88566	62532	246270	109270	157660	42007	41693	117990	173450
MEDP0086	Urea	Alcohol and amines	Amines	61	60.032	[M+H]+	CH4N2O	23704000	26470000	12866000	21234000	24144000	22770000	19493000	24260000	26926000	31669000	22008000	22114000	19090000	24499000	21718000	17957000	18418000	22826000	21813000	18455000	12381000	14171000	13278000	8858600	12611000	23352000	16133000	26173000	17843000	17786000	22116000	17275000	14078000	11484000	16479000	21157000	23899000	20056000	13462000	13207000	19231000	19089000
MEDP0087	L-Alanyl-L-Lysine	Amino acid and Its metabolomics	Amino acid derivatives	218.1	217.14	[M+H]+	C9H19N3O3	614710	940270	516560	630090	607620	1261800	639580	907790	1058200	1498200	879880	1274400	571090	597850	654970	610670	375220	627600	763700	697610	687040	658780	740080	255890	731060	861550	832140	1002600	826280	703430	637640	395720	584910	820480	551110	621820	926140	694130	681550	425660	622440	1025700
MEDP0089	N-Acetylhistamine	Alcohol and amines	Amines	154.1	153.1	[M+H]+	C7H11N3O	444220	530310	235960	363470	398850	307840	288770	211580	277970	330020	299770	264600	202900	375460	260860	379900	241740	413360	283400	217330	153010	246040	294990	170820	243270	439310	226700	427440	328980	323680	416280	160700	418740	665370	347610	203470	213730	350600	156260	263470	156010	440640
MEDP0101	P-Coumaric Acid	Benzene and substituted derivatives	Phenolic acids	165.047	164.047	[M+H]+	C9H8O3	5143900	6876900	7185500	6905800	5400900	4314200	3887500	4105900	8497900	5934700	7152700	5185800	3770900	4404600	5231700	5256400	6292800	5957600	5087900	3724000	3614000	4831100	5129500	4670300	5261400	5690900	6004100	8498700	6266000	4938300	4486200	3436000	5187500	6164000	7485800	5659300	5459700	5350300	4490100	3797900	5044700	7073600
MEDP0110	2-Methoxybenzoic Acid	Benzene and substituted derivatives	Phenolic acids	153.047	152.047	[M+H]+	C8H8O3	257120	260560	388660	300430	399890	263220	267030	227160	276120	281870	280080	422130	339160	388220	386170	415370	276190	296280	396100	344900	324860	376310	336070	381940	266270	442510	401460	406700	461940	331600	403390	547830	451270	436920	433280	423200	422340	382480	406730	591730	431610	387560
MEDP0115	1,4-Dihydro-1-Methyl-4-Oxo-3-Pyridinecarboxamide	Heterocyclic compounds	Pteridines and derivatives	153.06	152.059	[M+H]+	C7H8N2O2	6657200	7231900	3452900	5250400	5460800	3534300	3149800	2998900	4529100	4998700	4750800	3118300	2677400	5790000	3179500	5537100	3573500	4856100	3409600	2818700	2332600	3040200	4316900	1766500	2937700	7043900	3042800	5857200	5085700	4265900	6308200	2295900	5274000	8880000	5140100	3425800	3047500	3750300	1784900	2728500	2211100	6712900
MEDP0147	1-Methylhistidine	Amino acid and Its metabolomics	Amino acid derivatives	170.1	169.085	[M+H]+	C7H11N3O2	1223500	1690800	1285600	992300	1686300	1546900	1454700	1205500	1926300	1918900	1261300	2053800	1412600	1111900	810110	1301500	826820	1030100	1426100	1268300	1265700	811870	1122000	895560	824170	1355000	1274900	1144300	1892700	1568600	1080100	847610	1287500	1060200	999200	2367800	1296300	1116000	798130	505950	1345800	1827600
MEDP0151	2-Hydroxy-6-Aminopurine	Nucleotide And Its metabolomics	Nucleotide and Its metabolomics	152.056	151.049	[M+H]+	C5H5N5O	48033	29192	33345	13570	18841	43015	27965	23440	18132	18820	14260	13678	19119	62617	18941	10731	15207	33838	5290.9	38729	16988	17311	6816.5	13696	3763.3	12953	21334	22225	22324	30119	32746	9163	11482	21838	11401	20095	66777	8289	21098	25895	11300	45351
MEDP0154	5,6-Dihydro-5-Methyluracil	Nucleotide And Its metabolomics	Nucleotide and Its metabolomics	129.1	128.059	[M+H]+	C5H8N2O2	130970	218630	251420	120970	128800	247290	173220	191450	214030	147900	261620	293510	144080	160720	142840	127590	162260	192490	224850	141220	104880	87200	120760	120840	150980	157760	140010	132230	202780	126380	225290	70387	167110	90882	203750	229630	282240	147370	150940	82313	202690	163460
MEDP0159	Adenine	Nucleotide And Its metabolomics	Nucleotide and Its metabolomics	136.1	135.055	[M+H]+	C5H5N5	1408900	1881800	2026200	1948200	1454800	1385200	1053900	1173100	2313200	1630400	2114400	1548400	1025300	1222000	1729500	1551300	1781200	1773800	1641100	1013100	984030	1420400	1523900	1296900	1261100	1752700	1752700	2584100	2046800	1506900	1185200	1010300	1580100	1860600	2374300	1597700	1602800	1663800	1365500	1075500	1603200	1885600
MEDP0160	Adenosine	Nucleotide And Its metabolomics	Nucleotide and Its metabolomics	268.097	267.097	[M+H]+	C10H13N5O4	135400	123960	120640	146380	142300	97665	69839	91075	93940	48391	187210	86865	102300	113730	75115	99579	57250	36406	75041	37797	14687	54597	122850	44651	68168	92890	74653	224720	74115	150760	53556	26341	61624	56042	115220	223680	65492	72990	67647	64359	64084	88902
MEDP0165	Cytosine	Nucleotide And Its metabolomics	Nucleotide and Its metabolomics	112	111.043	[M+H]+	C4H5N3O	77467	106360	101410	118530	91031	39836	86609	75097	160930	120710	169930	80942	65670	73990	65388	62994	115350	88557	97519	43276	70213	72034	89209	77319	92836	127540	86306	113030	87105	84337	67385	49008	116830	146000	94095	140810	109240	95871	54823	51857	97606	103100
MEDP0166	Deoxyguanosine	Nucleotide And Its metabolomics	Nucleotide and Its metabolomics	268.097	267.097	[M+H]+	C10H13N5O4	135400	123960	120640	146380	142300	97665	69839	91075	93940	48391	187210	86865	102300	113730	75115	99579	57250	36406	75041	37797	14687	54597	122850	44651	68168	92890	74653	224720	74115	150760	53556	26341	61624	56042	115220	223680	65492	72990	67647	64359	64084	88902
MEDP0167	Guanosine	Nucleotide And Its metabolomics	Nucleotide and Its metabolomics	284.092	283.092	[M+H]+	C10H13N5O5	1849100	1662300	2381300	841930	1256300	1128900	1018200	422830	846300	1046800	658910	1126800	650810	1794200	863380	691920	897530	1746100	61427	859310	618800	496920	662970	598350	350180	667500	547100	1541500	1706700	1657800	1890000	474800	1296200	1875100	1017800	1467000	2555300	697800	676840	672590	432600	1589700
MEDP0174	Purine	Nucleotide And Its metabolomics	Nucleotide and Its metabolomics	121	120.044	[M+H]+	C5H4N4	1698600	1611200	1754100	1783700	1527000	1538000	1606300	1333100	2025700	1648800	1666700	1610500	1295200	1486700	1369700	1453000	1550800	1391700	1610000	1279900	1153300	1087100	1396300	1001200	1230300	1573600	1359400	1657900	1776000	1356800	1472400	955030	1489500	1582600	1612200	1503400	1317500	1560200	851350	1142600	1431700	1677600
MEDP0177	Thymine	Nucleotide And Its metabolomics	Nucleotide and Its metabolomics	127	126.043	[M+H]+	C5H6N2O2	73672	112480	161490	171590	106520	115690	112370	84481	146720	155720	169680	99370	114470	95581	103550	88300	127780	91555	106500	99291	84126	64690	83164	53725	68034	90925	118950	140500	96972	86368	110560	62072	110310	101520	130840	135930	160360	105940	69755	67512	157640	141250
MEDP0178	Uracil	Nucleotide And Its metabolomics	Nucleotide and Its metabolomics	113.027	112.027	[M+H]+	C4H4N2O2	1455300	1361400	1070000	1286000	957210	1107000	1447700	1079300	2000300	1250700	1136500	1228000	1011600	1255100	1244300	1080600	1363100	991780	1081500	1046000	523760	554520	981130	508980	814560	1689300	1000600	1286900	1223000	954710	760460	776560	1145600	756510	1282000	1088700	1037000	988740	672430	872940	1331500	1247600
MEDP0224	D-Fructose	Carboxylic acids and derivatives	Sugars	181	180.063	[M+H]+	C6H12O6	26512000	24543000	22471000	22919000	22673000	21669000	22261000	22345000	19994000	22476000	21545000	21110000	21209000	21505000	30604000	22290000	21339000	22906000	20236000	19403000	20174000	22762000	22224000	23646000	22253000	22031000	20245000	20070000	20086000	19563000	21328000	25164000	20904000	19908000	20108000	21436000	19008000	20327000	18627000	20946000	19476000	20565000
MEDP0236	D-Gluconic Acid	Carboxylic acids and derivatives	Sugar acids	197.058	196.058	[M+H]+	C6H12O7	839820	841890	801870	822550	831130	801400	809280	808970	890420	813170	854990	785600	787640	902040	795980	827450	710250	815870	810800	772280	866650	904370	809200	863910	858290	845680	768600	789660	798940	786740	737560	867990	759910	795390	821400	759410	798160	764620	779590	839630	790930	735680
MEDP0242	Nicotinamide	CoEnzyme and vitamins	CoEnzyme and vitamins	123.1	122.1	[M+H]+	C6H6N2O	3063500	1725000	1173900	2395500	1884200	1870200	2498700	1163600	2543100	1144600	2025500	2317600	1002400	2298400	1086800	2257700	2689400	1862400	599060	1285000	490140	1054500	1733700	398560	1061500	2431600	1237100	2651800	2542400	1733900	4522600	987690	2484500	1906600	1951800	1710500	922790	1659200	756520	1565300	853340	2006900
MEDP0247	Nicotinuric Acid	CoEnzyme and vitamins	CoEnzyme and vitamins	181.1	180.054	[M+H]+	C8H8N2O3	165080	148750	180570	92270	14568	155800	139730	136170	90610	130530	71164	216140	168770	226480	141650	37253	190750	86235	165110	169570	140720	68256	122980	93364	49913	23211	115350	155220	126370	134800	177850	70569	101850	108460	219590	283520	112970	177490	114640	107940	204060	162270
MEDP0250	Riboflavin	CoEnzyme and vitamins	CoEnzyme and vitamins	377	376.138	[M+H]+	C17H20N4O6	213430	201850	91302	241630	347640	238780	249580	336340	265080	396340	122840	128880	1949000	521840	126810	185030	176830	105950	272580	268880	153360	141210	157390	118220	302010	596040	199040	237000	341550	153060	210840	127930	275560	213870	147420	242100	555830	257340	369310	151860	932120	323580
MEDP0251	Trigonelline	CoEnzyme and vitamins	CoEnzyme and vitamins	138	137.048	[M+H]+	C7H7NO2	325780	294760	265940	314860	288360	391250	418490	232470	273470	319070	193700	174130	243580	2492200	167600	361090	297520	232790	250870	151220	149390	126640	61070	192930	149100	217970	78417	261960	220600	295570	177520	117710	153560	162120	166040	231900	204080	154420	76894	176160	197880	213290
MEDP0273	5-Hydroxytryptophol	Heterocyclic compounds	Indole and Its derivatives	178.08	177.079	[M+H]+	C10H11NO2	659600	476000	520790	396700	603820	476400	555770	468550	519670	471670	408620	515400	476490	365210	435070	258270	420640	443830	432200	471840	309210	334950	393500	322230	425490	460830	483350	503680	548210	392440	513070	359060	450130	420230	448590	396960	400260	343420	344350	380450	373850	398300
MEDP0296	4-Guanidinobutyric Acid	Organic acid And Its derivatives	Organic acid And Its derivatives	146.085	145.085	[M+H]+	C5H11N3O2	2412600	3249300	4684500	3053200	3253700	3258700	2412200	3235900	3396500	2879400	2852300	2304900	3472500	1960100	2872400	2479900	2665500	2997100	2293500	3160800	2977800	2366200	2743400	5433500	1649500	2031300	3437900	1879300	2605700	2502300	2626600	2315900	2879400	2523900	2376700	3538800	3303100	1861900	3032600	2188400	3233000	2113800
MEDP0297	5-Aminovaleric Acid	Amino acid and Its metabolomics	Amino acid derivatives	118.2	117.079	[M+H]+	C5H11NO2	45245	88800	42643	47319	87533	90320	66111	36119	52176	93731	63799	46676	60722	31686	43284	57451	50006	76371	33742	48412	49083	39033	33413	71618	68717	78534	44593	54587	62562	46705	56025	48587	56107	28946	62877	92514	88925	57519	49072	55992	76146	77503
MEDP0299	7-Methyluric Acid	Amino acid and Its metabolomics	Amino acid derivatives	183	182.044	[M+H]+	C6H6N4O3	743420	505310	503230	508880	640980	430990	580950	625240	474790	450890	412030	490910	461910	521470	576230	505690	468110	511380	527010	480800	378320	457510	482600	488950	338990	498820	353750	453630	393040	404670	487880	512160	454630	454020	364710	500690	405370	503460	585670	440770	429530	484430
MEDP0305	Creatinine	Organic acid And Its derivatives	Organic acid And Its derivatives	114.059	113.059	[M+H]+	C4H7N3O	634680	1185200	1181300	826730	1132900	1189800	601430	588340	1116100	911730	903160	1222400	992530	441140	624670	650750	967700	730960	787410	699760	624100	442580	607530	444250	350350	733230	923240	724330	1626300	806450	699760	303450	935170	555480	698810	1242600	940760	674000	512860	471100	799120	975280
MEDP0307	Dl-2-Aminooctanoic Acid	Organic acid And Its derivatives	Organic acid And Its derivatives	160.126	159.126	[M+H]+	C8H17NO2	2535100	216210	2669800	6271300	2144500	2115200	2741400	1716800	2545800	1609300	1346600	2101800	857280	1389700	1085700	1335300	1903500	2133600	1943900	2189300	1232500	651580	2058000	885680	1783900	3967300	2862300	1809800	2246800	2636800	885630	1340800	868250	1238000	1078300	2577600	2032800	2595500	1400300	1938200	875120	902050
MEDP0313	Guanidineacetic Acid	Organic acid And Its derivatives	Organic acid And Its derivatives	118.1	117.054	[M+H]+	C3H7N3O2	56584	65793	67206	58199	88923	95221	46532	33612	41175	71308	64776	72282	89844	35785	36458	57548	41594	79159	75169	50804	52692	58737	51411	44115	64033	73426	44849	45674	63477	72688	50604	51158	49288	57400	65097	84237	105520	30691	51449	73293	59726	92044
MEDP0315	Hippuric Acid	Organic acid And Its derivatives	Organic acid And Its derivatives	180.1	179.058	[M+H]+	C9H9NO3	1740100	9810100	1911800	17004000	2824300	23656000	7010600	16693000	10043000	6951000	8687000	11159000	6594700	9112500	2995000	23945000	5795300	3587300	2595500	2106500	6806300	1040300	2887900	618690	1234200	4373200	10721000	666560	6507500	5230100	2341200	2287500	1578600	1886900	2273800	14094000	10547000	8139800	1066000	5198000	902100	4904300
MEDP0319	Kynurenic Acid	Amino acid and Its metabolomics	Amino acid derivatives	190.043	189.043	[M+H]+	C10H7NO3	929090	1273700	1072300	553100	806910	973580	708730	704670	1210200	1546300	1201100	872740	1071400	830690	963290	798040	895410	1538500	877940	555300	363830	491100	644240	449090	598350	1065300	961990	842880	936770	826660	1700400	581710	966770	644950	1108500	1309600	1279700	717030	699330	397270	1042000	947510
MEDP0325	Maleic Acid	Organic acid And Its derivatives	Organic acid And Its derivatives	117.011	116.011	[M+H]+	C4H4O4	3175400	4216900	2853500	2975600	4883900	3842600	3184900	2597900	2625000	4211900	5453100	4112600	2814500	3504900	3289600	3685100	3039300	4065100	2878800	1824100	4719000	2682900	2604900	1700500	3245600	3435600	3608000	4684500	3409800	3570600	4613000	2564500	2965900	2344700	6043200	3629600	4339100	2440700	2742000	3408800	2610500	4036200
MEDP0326	N'-Formylkynurenine	Amino acid and Its metabolomics	Amino acid derivatives	237.1	236.08	[M+H]+	C11H12N2O4	65666	75098	49109	66862	44670	33165	44903	31267	66962	10511	38538	52570	46049	28437	23642	40500	28114	24210	32245	26844	26056	33622	25850	17365	21392	49828	12665	49107	35853	19253	14299	21451	42082	51659	51365	62648	29753	22939	51242	20265	33843	62998
MEDP0336	LPC(0:0/14:0)	GP	LPC	468.3	467.301	[M+H]+	C22H46NO7P	13574000	13785000	10176000	12096000	16422000	14760000	13275000	15148000	13608000	13854000	14342000	24525000	12068000	12325000	15455000	21226000	9576400	5787600	46661000	10208000	15746000	19588000	9764600	4038100	16441000	20703000	10195000	22286000	15692000	5488500	16776000	6235900	5853600	6405400	15400000	12221000	10727000	10434000	6311700	10545000	13210000	31993000
MEDP0338	LPC(16:0/0:0)	GP	LPC	496.33	495.332	[M+H]+	C24H50NO7P	518470000	496890000	457010000	486650000	498150000	472030000	479670000	467230000	513000000	485890000	476930000	492440000	469010000	453310000	463950000	462420000	469870000	446910000	513360000	437360000	468090000	492400000	458030000	414460000	485620000	498340000	432190000	492330000	480090000	420290000	451460000	404290000	456830000	424860000	477650000	434190000	482640000	429380000	431620000	425960000	496370000	514570000
MEDP0357	Urocanic Acid	Organic acid And Its derivatives	Organic acid And Its derivatives	139.04	138.043	[M+H]+	C6H6N2O2	280740	126670	32880	51840	32662	116660	84018	68542	98941	107560	50736	52262	136710	294000	77936	79087	14263	174640	48966	216740	48508	166250	56065	52615	75657	94887	62236	111020	60018	99567	111060	23433	35863	17766	122590	337050	37642	38351	119640	93892	65854	66003
MEDP0365	Cotinine N-Oxide	Heterocyclic compounds	Heterocyclic compounds	193.09	192.09	[M+H]+	C10H12N2O2	24936	4312.8	9	9	9	9	9	9	9	114010	70816	13743	2665.7	9	4958	9	9	76079	9	9	45603	82259	82507	9	17437	9	30054	36050	14251	72495	132830	9	9	9	1373	140710	1675.8	9	9	9	2687.5	9
MEDP0368	Taurocholic Acid Sodium Salt Hydrate	Bile acids	Bile acids	556.28	555.284	[M+H]+	C26H46NNaO8S	6773100	7204300	6425400	6429700	5960400	5949900	6418100	5875900	6206200	5634800	5528300	5213400	5206300	6012000	5818000	5646100	5397300	5311500	5106400	5098900	4842300	5553800	5112400	5801500	5302000	5005300	4686600	4533700	5032300	5171400	4738500	4950000	5088800	5331000	4954100	5119600	5161500	4859100	4226100	5362900	4634500	4817900
MEDP0369	4-(Aminomethyl)-5-(Hydroxymethyl)-2-Methylpyridin-3-Ol	Heterocyclic compounds	Pteridines and derivatives	169.09	168.09	[M+H]+	C8H12N2O2	228470	271210	243840	276660	197790	242530	237600	290710	263000	217440	256020	186350	258450	199020	299120	270640	282660	236990	225540	268070	266420	240550	229530	205400	273340	251560	279900	171380	200900	235020	214090	201790	157710	241660	283470	254100	213520	188020	112000	214420	202000	201520
MEDP0373	N-Acetylglycine	Amino acid and Its metabolomics	Amino acid derivatives	118	117.043	[M+H]+	C4H7NO3	46675000	40377000	40546000	33677000	42537000	44524000	52879000	71812000	43566000	51046000	42651000	42090000	33281000	57333000	38870000	40203000	32960000	32139000	37908000	33142000	37341000	33362000	42374000	40811000	44696000	42997000	39466000	36089000	43703000	33833000	33759000	45289000	36410000	36984000	33218000	37684000	49553000	31229000	34512000	26833000	45589000	35389000
MEDP0387	L-Homoarginine	Amino acid and Its metabolomics	Amino acids	189	188.127	[M+H]+	C7H16N4O2	275440	372830	118450	182410	261050	196120	144620	219380	210160	302020	156670	270380	110440	169940	80921	92211	144540	151660	177510	144510	167890	192240	417670	176000	202190	340750	190800	291430	247260	228060	286160	168200	164780	160190	129980	196560	255300	89502	200160	179010	427680	218000
MEDP0389	Pantetheine	CoEnzyme and vitamins	CoEnzyme and vitamins	279.13	278.13	[M+H]+	C11H22N2O4S	231310000	246210000	233640000	259870000	197120000	241100000	205990000	246370000	238550000	231830000	259970000	225670000	247880000	263750000	255820000	258180000	266200000	230620000	241470000	236420000	266610000	235560000	251920000	264560000	238100000	256110000	268230000	245850000	258680000	247830000	249130000	273700000	230790000	258270000	256060000	233470000	245600000	244540000	242290000	245090000	234580000	259450000
MEDP0394	4-Hydroxyretinoic Acid	CoEnzyme and vitamins	CoEnzyme and vitamins	317.3	316.204	[M+H]+	C20H28O3	78244	133400	77611	131280	125270	109560	37210	132230	182650	102910	168730	145720	79236	82808	79820	67007	72896	67434	228210	55039	103620	35593	86421	59339	68322	54722	71668	104980	127120	116260	107150	28682	90598	41644	86466	159680	116430	149600	69024	56071	176850	59447
MEDP0395	D-piperidine acid	Organic acid And Its derivatives	Organic acid And Its derivatives	130	129.079	[M+H]+	C6H11NO2	2384400	2091400	3919900	4344500	1185300	2270900	2816300	619360	2856700	1740100	3094200	2936200	784240	3553000	1365900	1129000	2231900	2121800	3096400	1596100	1296600	856140	547250	680680	1404000	2160400	1240500	1814000	1564100	1836500	1140600	1325600	1028200	1949900	2980000	2185500	1666500	1887000	1985300	2878900	1774300	1611300
MEDP0401	5'-Deoxy-5'-(Methylthio) Adenosine	Nucleotide And Its metabolomics	Nucleotide and Its metabolomics	298	297.09	[M+H]+	C11H15N5O3S	127330	187470	303130	180920	156230	112570	159030	154590	93477	142610	181060	244460	109040	140090	70506	99268	37165	103330	202670	107880	172820	179740	216320	214540	124290	168790	159090	265040	205770	103300	266440	84585	162090	207810	122770	169870	351290	84724	211290	83116	216720	89086
MEDP0404	Sarcosine	Amino acid and Its metabolomics	Amino acids	90	89.048	[M+H]+	C3H7NO2	1893800	1725800	1891200	1694300	1848200	1827400	1729700	1662800	1714800	1744400	1775300	1859800	1782200	1573800	1701100	1652900	1591800	1692500	1588000	1689100	1882400	1581900	1561000	1477100	1617700	1458100	1700900	1550800	1508100	1410500	1397900	1321800	1285300	1259400	1351600	1280900	1351900	1183700	850580	1354100	1322100	1292100
MEDP0429	FFA(18:3)	FA	FFA	279.3	278.225	[M+H]+	C18H30O2	9672500	5044500	10121000	3174400	4829500	6423500	4005100	2435200	4824300	2769600	3329900	5028900	2693800	3029400	2061400	4143100	3295300	5988800	3378400	896220	2757600	5390600	2137900	1712600	5115200	1861900	3153800	3043700	3273400	1247300	4256300	1118200	5309900	1508700	3576200	6463200	2998400	1355800	3779500	620570	3012800	3882500
MEDP0430	2-Aminoadipic Acid	Organic acid And Its derivatives	Organic acid And Its derivatives	162.3	161.069	[M+H]+	C6H11NO4	108560	115810	73721	90591	122510	15151	183720	100290	100930	176530	89530	164290	69534	199300	55219	107210	62979	153190	121400	82593	43616	79315	119540	56544	115680	166930	86896	148060	222480	127890	107690	76166	89329	71705	47590	68854	73407	65740	66742	49857	120600	262470
MEDP0434	LPC(17:0/0:0)	GP	LPC	510.1	509.348	[M+H]+	C25H52NO7P	106070000	73054000	64431000	75675000	67809000	76184000	56553000	59471000	129580000	83527000	62846000	85414000	75312000	74199000	82813000	62143000	61827000	49993000	120320000	52145000	57298000	53833000	73519000	28310000	60012000	86075000	45037000	55360000	59536000	48503000	44661000	26571000	35259000	27826000	73890000	74111000	77199000	88329000	47719000	43488000	93352000	100490000
MEDP0438	N-Formylmethionine	Amino acid and Its metabolomics	Amino acid derivatives	178	177.046	[M+H]+	C6H11NO3S	47045	48495	108980	113720	67758	76807	37961	59423	47004	86137	73397	46189	77960	92312	28250	63378	110740	27850	50994	44886	67068	56078	135650	46984	58734	38769	53453	88402	56424	44668	105440	42934	147400	14322	47777	121780	123120	49180	23878	77334	26320	104170
MEDP0442	Sn-Glycero-3-Phosphocholine	Tryptamines,Cholines,Pigments	Cholines	258.2	257.103	[M+H]+	C8H20NO6P	2205100	1774800	865330	1544100	2183800	1721300	2104900	1598100	1898600	1206100	1858500	1898600	2002400	1252300	1455200	2084600	1717100	906940	3125700	1039200	1754900	1794600	1546600	1068500	2934700	3077100	1347600	1548700	1617500	1030500	847770	2170500	935350	1047400	1556000	1043700	1349700	2044700	1805400	1905700	2314700	2603600
MEDP0453	Indole	Heterocyclic compounds	Indole and Its derivatives	118	117.058	[M+H]+	C8H7N	9303400	10547000	8837500	7717300	10209000	7303200	8222800	6608800	9331800	9770900	9237700	9690300	7500000	7511200	7229900	7464100	9113300	7507100	9479400	7078900	6065600	6921100	8244900	5448500	7457200	8865700	7849600	10151000	10059000	8175100	7900900	6274600	6439900	7794000	10120000	7992800	8227700	7113000	5022800	5637600	9283200	8332700
MEDP0457	5-Aminolevulinate	Organic acid And Its derivatives	Organic acid And Its derivatives	132.1	131.058	[M+H]+	C5H9NO3	92559	145890	39902	113320	163760	58062	96794	78439	168900	177240	77957	184110	94066	73706	98560	62481	101480	154710	134220	145690	70527	96498	120690	93985	82165	410520	86974	144060	87453	191190	69527	86180	66420	28913	95904	101510	347020	209870	302200	93552	116020	71953
MEDP0494	LPC(15:0/0:0)	GP	LPC	482.3	481.317	[M+H]+	C23H48NO7P	39693000	35180000	33974000	31648000	34870000	49304000	30900000	34546000	66686000	43047000	37212000	52872000	36630000	37370000	49086000	45200000	32475000	20770000	79513000	41437000	32577000	25116000	39095000	15804000	26542000	42001000	27878000	33292000	47551000	22328000	36418000	14314000	19449000	18613000	39848000	37757000	37769000	42749000	21083000	27767000	56622000	59210000
MEDP0495	LPC(0:0/18:2)	GP	LPC	520.33	519.332	[M+H]+	C26H50NO7P	99006000	97736000	52361000	92167000	99804000	89493000	68214000	70668000	95593000	93823000	93684000	112110000	87200000	67957000	58622000	64113000	106840000	80150000	104000000	63134000	93984000	85492000	73016000	46477000	76622000	71885000	76212000	81074000	67114000	55983000	61590000	47858000	65951000	35053000	84117000	94619000	103170000	120880000	100490000	68033000	84472000	87874000
MEDP0507	2-Hydroxycinnamic acid	Benzene and substituted derivatives	Phenolic acids	165.047	164.047	[M+H]+	C9H8O3	5143900	6876900	7185500	6905800	5400900	4314200	3887500	4105900	8497900	5934700	7152700	5185800	3770900	4404600	5231700	5256400	6292800	5957600	5087900	3724000	3614000	4831100	5129500	4670300	5261400	5690900	6004100	8498700	6266000	4938300	4486200	3436000	5187500	6164000	7485800	5659300	5459700	5350300	4490100	3797900	5044700	7073600
MEDP0510	Carnitine C2:0	FA	CAR	204.122	203.116	[M+H]+	C9H17NO4	70878000	85758000	83793000	71803000	65890000	40370000	74925000	77614000	88436000	69904000	79367000	63957000	60281000	55886000	49723000	44991000	55808000	76274000	38578000	60832000	56377000	56993000	57551000	59397000	71172000	80046000	66106000	90420000	46147000	58090000	80389000	43517000	91097000	71715000	76114000	59125000	95176000	78969000	65958000	29705000	81644000	89868000
MEDP0518	DL-Stachydrine	Organic acid And Its derivatives	Organic acid And Its derivatives	144.102	179.071	[M-Cl]+	C7H14ClNO2	2046600	385350	509730	1457900	1201500	4114100	1526400	844950	1835000	1343200	2957400	470930	1181500	2437200	338740	2917600	298920	165850	5066200	1017300	678520	1430300	611810	375680	631420	423750	468480	85141	4965400	293980	286370	804460	427670	362860	859390	1663300	185200	212020	208690	2009700	187720	1088800
MEDP0519	L-Norleucine	Amino acid and Its metabolomics	Amino acids	132.102	131.095	[M+H]+	C6H13NO2	20039000	25049000	18884000	16633000	22843000	16387000	18650000	14607000	19952000	20757000	20334000	20805000	15652000	15551000	15170000	15342000	18465000	14578000	17802000	13614000	11433000	11452000	15599000	9362100	12823000	14957000	13536000	17987000	17994000	14644000	12900000	9701700	9556000	11185000	16415000	13333000	13065000	11334000	7151000	8044200	15405000	13018000
MEDP0523	DL-Carnitine	FA	CAR	162.112	161.105	[M+H]+	C7H15NO3	10982000	14800000	19068000	15823000	15765000	11017000	9051200	11251000	15821000	12684000	11585000	14813000	14659000	6600900	10914000	11659000	9636900	11185000	12407000	13183000	16574000	15858000	20318000	15181000	13875000	14509000	16480000	15329000	15916000	12789000	11138000	8720900	14655000	13317000	12585000	14569000	13738000	14844000	13068000	10110000	13558000	12999000
MEDP0528	5-Aminosalicylic Acid	Organic acid And Its derivatives	Organic acid And Its derivatives	154.043	153.043	[M+H]+	C7H7NO3	79587	39861	36077	40805	16673	10940	59157	53594	58817	66981	42581	37598	5134.4	45458	33570	41997	23326	66458	78371	54658	3953	9457.4	48683	48179	19920	70463	23198	92052	64235	35493	28142	33342	84889	19384	29641	21748	13740	31742	42438	15372	38610	43547
MEDP0529	Indole-3-acetamide	Heterocyclic compounds	Indole and Its derivatives	175.079	174.079	[M+H]+	C10H10N2O	109700	243540	194120	158260	100050	72858	113520	167650	186570	198080	292330	162150	216930	183190	132650	243060	83591	148320	288190	226470	126970	154680	226130	180710	163360	284910	172130	327300	370970	215580	200690	138270	770530	359170	368550	259850	207570	186630	144380	74141	314820	172410
MEDP0545	2-Pyrrolidinone	Heterocyclic compounds	Heterocyclic compounds	86.0528	85.0528	[M+H]+	C4H7NO	7320400	8585300	9771200	6667500	9591700	7541800	6576400	8465200	9381500	9925100	9232800	8248300	5296000	6409300	5910100	4793700	6377600	7423500	10542000	8476500	4324200	4298900	5915200	2940600	4715800	8336800	6688000	9559000	9413700	6089700	7650900	3816700	8128300	7787800	6562200	5892200	7095500	4506100	5027300	4075600	7137300	7577600
MEDP0560	Dihydrouracil	Nucleotide And Its metabolomics	Nucleotide and Its metabolomics	115.043	114.043	[M+H]+	C4H6N2O2	29604	62465	32979	36847	52261	33450	44311	42487	10028	29321	45589	59633	53189	68787	15391	43975	39905	24794	65863	28404	30610	32831	34988	31561	19885	71601	48621	35773	33630	30419	18572	55918	68492	31476	69326	46407	35603	60377	30173	40417	39135	46443
MEDP0576	N1-Acetylspermine	Organic acid And Its derivatives	Organic acid And Its derivatives	245.226	244.226	[M+H]+	C12H28N4O	268520	344130	234000	179790	173910	129870	190850	185590	210690	183050	196000	200680	103990	127160	113140	104750	168380	211180	109740	155550	105980	154980	128780	136580	99896	224230	112770	273600	207650	142980	213390	64347	337810	121190	157160	193130	285720	101090	101020	58592	172930	139690
MEDP0577	Carnitine isoC4:0	FA	CAR	232.147	231.147	[M+H]+	C11H21NO4	5002100	8549100	8669500	8682800	8035000	6518800	8340400	11485000	11122000	20336000	10166000	12727000	6821500	6807200	5938400	7621400	4092300	9653400	10632000	7406400	6826200	4524300	5572500	3275300	4820900	6234800	11311000	11111000	9606000	10564000	8212000	3446700	7663800	6144400	7734700	10868000	13043000	7345700	8725000	4379800	6870600	12762000
MEDP0587	N-Alpha-acetyllysine	Amino acid and Its metabolomics	Amino acid derivatives	189.116	188.116	[M+H]+	C8H16N2O3	1122500	2240900	935270	954590	1357800	1120400	1111300	1242000	779520	1465500	947410	1339100	949460	1088600	605490	902390	1033900	1122300	1023900	914620	935600	997670	1189400	626710	752840	942570	841460	1170900	1177700	1073000	934500	729090	601220	745320	818960	1152500	1246700	749860	847360	662490	1569100	1353200
MEDP0601	Spermidine	Alcohol and amines	Polyamines	146.158	145.158	[M+H]+	C7H19N3	494730	401420	374130	352610	406780	416830	553140	359280	393620	392000	425970	376680	450570	435270	382560	423280	521460	403320	360950	465200	313870	303610	369330	359100	339910	614030	422440	395570	483990	389310	377910	326360	366160	397010	335040	359580	600750	305420	266700	309440	346230	343810
MEDP0611	N-Acetyl-L-Histidine	Amino acid and Its metabolomics	Amino acid derivatives	198.08	197.08	[M+H]+	C8H11N3O3	112750	116330	86320	92332	91566	102810	97850	99978	96788	67836	115470	90605	104750	112520	102310	100840	80091	88764	81227	56522	82568	72311	76439	86006	101150	70334	92987	75140	77196	94752	94162	93332	78144	75761	64728	70798	65466	104700	66688	81753	90392	86943
MEDP0617	2-Furoylglycine	Amino acid and Its metabolomics	Amino acid derivatives	170.038	169.038	[M+H]+	C7H7NO4	145410	8632.3	7467.3	48909	35102	76856	9552.5	26142	15838	38362	75687	48102	22362	3990	21970	8553.9	7433.7	33425	20578	8164	85538	39545	46548	15195	13370	22417	23104	29396	22451	91554	49797	15103	1704.8	14352	6740.9	86280	19805	16823	24004	13785	8013	12227
MEDP0618	Carnitine 2-methyl-C4	FA	CAR	246.163	245.163	[M+H]+	C12H23NO4	4100600	8313100	1514900	859510	2370300	2098800	2552100	2540300	4753300	5549900	3631800	4357800	2088200	978420	1177100	1530300	924290	6110600	3548600	2477700	3367200	2864900	2208300	1196500	3118400	2363100	2363300	4090500	4658500	2429200	4164100	1050400	1761800	2590200	1690700	3635000	1303300	1581900	1728600	1075700	2525800	2674700
MEDP0637	Phe-Pro	Amino acid and Its metabolomics	Amino acid derivatives	263.132	262.132	[M+H]+	C14H18N2O3	685270	1090000	688050	400650	990820	539310	684250	605910	934400	1181500	888460	1087400	615600	560380	502310	398040	403220	909880	591730	485820	535740	477950	772490	329530	444320	716900	812950	695500	1309700	798750	727190	473520	513700	505790	699950	827760	881540	423610	691410	233570	1225800	997800
MEDP0638	LPE(16:1/0:0)	GP	LPE	452.27	451.27	[M+H]+	C21H42NO7P	37095	36331	13837	23889	48627	32358	10483	17623	28327	31171	33211	87222	18832	17517	18630	34585	22576	11482	43825	14888	80246	93645	28919	7990.7	61510	33068	15390	62498	42930	12225	48892	8032.5	34888	28205	48181	40700	38687	21536	60898	37381	37865	81970
MEDP0677	Butylamine	Alcohol and amines	Amines	74.1	73.0891	[M+H]+	C4H11N	139660	215730	119940	133440	159130	104070	148080	68898	129070	114680	162690	232040	97188	151880	121530	114660	164630	145810	172730	142100	68247	211100	127620	133910	151110	162810	114370	148760	181940	161640	128270	133740	231570	110720	104740	165390	74423	73030	122760	157690	150220	120760
MEDP0700	Methyl beta-D-galactopyranoside	Carboxylic acids and derivatives	Sugar derivatives	195.2	194.079	[M+H]+	C7H14O6	125320	171200	95832	175500	152410	122640	146480	141810	188440	116140	150330	165670	117070	260760	124200	141620	104560	131970	128830	105370	123950	90642	69585	80051	152310	147190	153340	120830	142640	121990	132780	300860	160410	175530	261790	93727	168600	93976	67369	121020	169530	124080
MEDP0724	2-Hydroxy-3,5-dinitrobenzoic acid	Organic acid And Its derivatives	Organic acid And Its derivatives	229.1	228.002	[M+H]+	C7H4N2O7	42791	49020	31329	41812	44637	35059	34250	46048	45275	42913	34836	36176	29267	27517	29227	34826	28289	50647	18820	33959	24848	19686	32334	20649	34748	40793	32375	42468	54125	30112	35878	23663	32893	42444	25695	31212	30050	31296	28175	21796	31595	42806
MEDP0729	Barbituric acid	Heterocyclic compounds	Heterocyclic compounds	129	128.022	[M+H]+	C4H4N2O3	18602000	19664000	17331000	15076000	17599000	20723000	19338000	14359000	21099000	16240000	15476000	18388000	16396000	15835000	11746000	16554000	18043000	15124000	17016000	17169000	15997000	12242000	11022000	13382000	15819000	16909000	18356000	15345000	17214000	15876000	14335000	10682000	18075000	16643000	12867000	15482000	13318000	10857000	7433800	14063000	15944000	17638000
MEDP0765	3-(Methylthio)-1-propanol	Alcohol and amines	Alcohols	107.045	106.045	[M+H]+	C4H10OS	68155	269180	45460	563260	115560	273110	81903	119290	116140	102590	107140	158520	77902	329030	147810	74643	145540	168370	104400	87535	90008	62921	293060	31675	61791	268840	69844	307920	169680	173920	46452	30420	111340	36531	162180	200240	37567	644620	13279	46679	58515	119550
MEDP0789	2-Pentyl-3-phenyl-2-propenal	Aldehyde,Ketones,Esters	Aldehydes	203.4	202.136	[M+H]+	C14H18O	330900	291380	324540	312320	200800	181420	201040	222120	216980	200030	181960	198420	195510	252040	187460	191130	204570	209800	191030	210440	205760	206580	170660	225510	222030	202790	187210	197450	167360	174030	173430	183250	228400	181940	180010	226780	174220	196830	169560	248010	173650	196550
MEDP0792	Pyrrolidine	Heterocyclic compounds	Heterocyclic compounds	72.3	71.0735	[M+H]+	C4H9N	1796300	1627900	1319100	1567700	1869300	1378000	1922700	1145200	1824100	1937800	1648700	1719500	1207500	1551100	1238100	1153100	1415400	1705100	1474500	1103900	1144200	1243500	1418900	755110	1286800	1280900	1365000	2357100	1445900	1421800	1301000	961700	1178600	1347700	1697500	1194700	1263400	1116200	1210200	849790	1761200	1792300
MEDP0821	6-Methylnicotinamide	Heterocyclic compounds	Pteridines and derivatives	137.1	136.064	[M+H]+	C7H8N2O	31674000	35791000	12852000	14816000	22227000	16107000	15941000	6869700	16441000	16076000	12388000	19098000	7005300	26417000	17449000	11857000	11575000	26684000	91726	11448000	11783000	6090500	5421900	5582500	5676000	10092000	11039000	24235000	22131000	16472000	13959000	5523200	8625800	23961000	16355000	11824000	19600000	10535000	8378100	8799400	11547000	19116000
MEDP0831	1-Aminopropan-2-ol	Alcohol and amines	Alcohols	76	75.0684	[M+H]+	C3H9NO	41289	247190	81451	187110	95198	300430	346900	242110	189890	175430	124200	2311500	348220	124270	140200	91219	293330	104370	487630	41169	370340	54812	293280	52796	147440	76108	224600	171100	277810	224230	70790	70539	283490	88566	62532	246270	109270	157660	42007	41693	117990	173450
MEDP0859	Gly-Phe	Amino acid and Its metabolomics	Amino acid derivatives	223.2	222.1	[M+H]+	C11H14N2O3	5056300	2550600	6862400	3973700	4385100	4331100	2281600	3727800	6174400	5185100	3610200	4458300	3833600	4528200	2766800	3459000	2352900	2212900	1874800	4311600	2910800	1892500	4492000	1998900	3313600	5626700	3119300	4256100	6872700	2937500	4462000	2256000	3014000	1927100	3226300	3938400	2989700	2829900	2750700	1424500	3109700	5301400
MEDP0868	N-Methylalanine	Amino acid and Its metabolomics	Amino acid derivatives	104	103.063	[M+H]+	C4H9NO2	2784000	2945200	2176700	2516800	2804400	2027800	2879800	2044700	3415500	3034200	3241700	3422600	1792900	2838000	2199300	2267100	2811300	2729100	3101200	1766200	1604900	1885200	2099300	1651300	1995000	2899800	1906700	3135900	2996200	2275700	2584200	2024700	2950400	1757100	2827000	3065100	2553500	2556200	1591600	1913100	2553800	3055900
MEDP0876	O-Succinyl-L-Homoserine	Amino acid and Its metabolomics	Amino acid derivatives	220.2	219.074	[M+H]+	C8H13NO6	47288	36327	13243	21935	42588	38280	54478	28423	19249	38940	7424	20940	32906	55729	14169	23407	22777	20966	29218	27950	19528	30951	40911	23264	19233	35096	31788	23348	20161	21616	44024	32879	23147	13558	43722	37864	29940	52068	19050	26881	45198	19973
MEDP0878	N-Methyl-L-Glutamate	Amino acid and Its metabolomics	Amino acid derivatives	162.3	161.069	[M+H]+	C6H11NO4	108560	115810	73721	90591	122510	15151	183720	100290	100930	176530	89530	164290	69534	199300	55219	107210	62979	153190	121400	82593	43616	79315	119540	56544	115680	166930	86896	148060	222480	127890	107690	76166	89329	71705	47590	68854	73407	65740	66742	49857	120600	262470
MEDP0880	N-Alpha-Acetyl-L-Asparagine	Amino acid and Its metabolomics	Amino acid derivatives	175.3	174.064	[M+H]+	C6H10N2O4	1453800	794190	2266900	1434900	1909700	1285800	720530	1149000	894560	2049400	790650	1086400	1334700	1109300	693470	1502600	1443400	778240	1263600	1256100	1229700	1301000	2133500	1695100	1175800	1562500	1123300	1167500	1586800	1077600	2331900	1206100	2153700	1015100	1229600	2061000	1392300	1020600	1263300	1294500	1173400	1537300
MEDP0881	Phosphocholine	Nucleotide And Its metabolomics	Nucleotide and Its metabolomics	185.1	184.074	[M+H]+	C5H15NO4P	1803600	2022100	1282400	1439900	1409400	1530500	1471900	1206100	1578300	1369900	1705000	1403000	1256900	1292900	1621500	1179600	1462600	1614900	850520	945750	1535600	1165400	1027700	884950	1205100	1534700	1200400	1485600	1581700	1132500	1655700	1199000	1356800	1314200	1290900	1410700	1481200	1363500	1245500	1199400	1432800	1684100
MEDP0889	Cortisol	Hormones and hormone related compunds	Hormones and hormone related compunds	363.5	362.209	[M+H]+	C21H30O5	1843800	2527300	2271100	1972200	1901100	2114500	1302600	1177300	2062600	2154400	1215200	2017000	2293400	2044500	1182200	1741400	1704900	1135000	1358700	1082000	1186600	1793100	1573800	853580	1387700	1403600	1182600	1720200	1368000	1397400	1218700	857580	1588000	2140600	3060800	2092500	2119200	2819600	1739700	1426600	1593200	2293600
MEDP0890	Lumichrome	Heterocyclic compounds	Heterocyclic compounds	243.2	242.08	[M+H]+	C12H10N4O2	69796	50147	32703	52252	58073	43123	45557	86014	46244	52826	23481	41270	153390	65200	36600	42193	38060	26173	49033	39821	32084	25848	43580	29925	55490	76790	29972	34491	50907	17543	28898	25471	48595	34993	27786	34013	55338	25271	51648	32813	69992	65127
MEDP0891	L-Tryptophanamide	Amino acid and Its metabolomics	Amino acid derivatives	204.3	203.106	[M+H]+	C11H13N3O	70053	136140	83348	53125	79881	72789	84304	61273	182380	77054	92896	99633	96069	86842	106590	79514	133770	92701	152930	103300	142070	170120	223090	141830	173760	242290	221510	365470	346490	276550	319720	198830	234410	273020	431020	359670	398920	284180	235240	229090	448440	362230
MEDP0894	3-Methoxytyramine	Benzene and substituted derivatives	Phenolics	168.1	167.095	[M+H]+	C9H13NO2	163170	125770	148450	107830	99879	83758	133470	86654	191710	134010	149540	116010	113010	129700	131750	139230	186350	137770	119520	102030	120810	102890	123920	103470	90322	134340	120500	165600	156240	151080	128010	79054	132970	126400	133920	103310	88303	140860	91108	97494	137830	129770
MEDP1002	Acetylcholine	Alcohol and amines	Polyamines	146.108	145.11	[M+H]+	C7H15NO2	293670	542280	962430	571900	504370	539730	282820	409240	606060	350560	344650	354230	955200	268440	356570	420020	510420	490500	426960	673870	679490	453290	565070	967010	183870	344560	732120	263240	399770	501180	526360	293290	722900	364610	360610	691600	485540	311340	368630	587240	533930	370010
MEDP1003	1-Hydroxylamino-2-phenylethane	Benzene and substituted derivatives	Benzene and substituted derivatives	120.082	137	[M+H]+	C8H11NO	9550000	9674500	10227000	10133000	9045200	8677700	9178400	7834400	12426000	9281400	10238000	9374000	8733500	9226500	9048800	9121900	9093600	7457300	9699800	7764200	6497100	6822400	8512700	5882300	7060300	9028300	8641300	9947300	10286000	7398400	8897600	6126200	9379900	8763500	9946600	8837200	7858000	8988100	5680500	6492200	9014900	9208300
MEDP1005	β-Alanine	Amino acid and Its metabolomics	Amino acids	90.048	89.048	[M+H]+	C3H7NO2	2021200	2776300	1827600	2160000	3545500	2290600	2164300	1323200	1875300	1978800	2576000	2999300	1422300	1676200	1939500	2336300	1271000	1047100	2156200	1266400	2180900	1857900	1931000	1234600	1697100	2812900	1873700	2520300	2391300	1677700	1785800	1379800	1711300	1452200	2159300	1858800	1850400	1439100	1014700	1566900	1622000	2429000
MEDP1013	γ-L-Glutamate-Cysteine	Amino acid and Its metabolomics	Small Peptide	251.06	250.062	[M+H]+	C8H14N2O5S	115450	110430	49774	86009	97869	132920	151810	117840	161370	113910	110310	53350	58381	126150	113490	123960	175250	148850	76358	106990	82001	63377	54281	31034	47681	140950	72071	115950	101420	138760	83220	35264	50624	122640	129450	73507	94696	110690	41879	109960	77896	162910
MEDP1022	Threoninyl-Phenylalanine	Amino acid and Its metabolomics	Small Peptide	267.124	266.127	[M+H]+	C13H18N2O4	20525	28729	81519	60989	23909	31620	27658	30149	77728	24055	33775	64463	27386	25961	35411	18701	39191	16642	16310	27903	28657	9254.5	40574	23808	24872	8838.8	27260	18234	33692	17931	21690	18482	17336	7480.5	35204	32732	32577	45270	26297	23873	28765	10931
MEDP1034	Stachyose	Carboxylic acids and derivatives	Sugars	689.208	666.222	[M+Na]+	C24H42O21	14954	13503	703.13	9	9904.7	4088	7079.1	9	2116.5	19744	6466	7771.7	11346	9923.7	11342	7797.4	4270	4334	5056.8	2116	9369.8	703.13	5054.4	9	11356	14329	6333	17043	7099.8	12278	12107	2122	9	710.96	11420	2820.6	6360.3	4088	7121.5	2167	4231	13452
MEDP1039	Maltotriose	Carboxylic acids and derivatives	Sugars	505.169	504.169	[M+Na]+	C18H32O16	11969	33856	55807	43641	35133	19010	23936	37314	38029	38768	30976	26744	37474	17599	22522	14077	31006	33161	43663	33089	19010	7742.9	20414	8425.4	4951.8	11969	36620	29567	28166	11263	16191	4927.3	34490	14120	26751	39428	53636	29574	48645	30976	47852	26751
MEDP1059	2-Picolinic Acid	Heterocyclic compounds	Pteridines and derivatives	124.084	123.032	[M+H]+	C6H5NO2	41862	21675	7481.1	18266	18353	9296.3	8146.7	8586.7	24281	31127	43357	56592	23602	26445	13419	28169	28852	26920	25693	5433.9	39281	11682	10364	12037	18052	6524.2	17735	31134	9983.5	23392	22592	11155	17292	1248.8	17867	39594	25557	4849.1	14544	2948.3	11388	12979
MEDP1061	DL-O-tyrosine	Amino acid and Its metabolomics	Amino acids	166.085	165.079	[M+H]+	C9H11NO2	371250000	368050000	388260000	363210000	368990000	392250000	385870000	356280000	399600000	361770000	357660000	346600000	392670000	366860000	352360000	365750000	379740000	336070000	357400000	373360000	348090000	342010000	356800000	338470000	334650000	347320000	363310000	361320000	371150000	365480000	383150000	321590000	363930000	373400000	349020000	365590000	351050000	347160000	311920000	339320000	374590000	360090000
MEDP1068	PC(8:0/8:0)	GP	PC	510.3	509.312	[M+H]+	C24H48NO8P	154740	101970	63336	82225	111230	71588	49141	66909	181300	124040	131860	197330	110420	104130	165000	78569	56109	26737	170770	67449	98553	177310	93807	3954.3	126430	161870	43006	117480	101390	62409	75811	19498	61121	48827	114840	117320	126110	123230	99255	56469	112000	200290
MEDP1072	7-methylguanosine	Nucleotide And Its metabolomics	Nucleotide and Its metabolomics	298.1	297.107	[M+H]+	C11H15N5O5	294410	450080	327320	354510	309380	398760	355480	247510	515310	364990	355600	375960	261280	351290	236240	237670	324260	320760	348420	281270	203060	250100	252520	190000	231240	431310	250120	358210	493140	282230	307700	167090	431890	346700	363550	278700	365210	266510	260090	214140	304330	377720
MEDP1073	6-O-methylguanine	Nucleotide And Its metabolomics	Nucleotide and Its metabolomics	166.071	165.065	[M+H]+	C6H7N5O	1849400	1778700	1625600	2187600	1862500	1782200	2084100	1614600	2461000	1840000	2587000	2185400	1336600	1542100	1615800	1515300	1653200	1528300	1720400	884610	1264400	1305800	1392200	875780	1450200	1996600	1341100	2465500	2176900	1677600	1501300	727900	2471900	1607300	2881400	1932100	1882100	1587600	1345300	1223700	2009200	2238500
MEDP1076	Kojibiose	Others	Others	325.111	342.116	[M-H2O+H]+	C12H22O11	108920	99230	262030	106230	116160	120310	90494	211440	63986	116190	73468	105290	200520	106420	74430	74001	82179	82163	227840	146690	223010	305290	290570	296300	296360	122150	173060	66334	101750	82575	209080	256400	154270	126400	75817	131020	148680	87255	311830	145710	372360	164650
MEDP1083	Oxypurinol	Nucleotide And Its metabolomics	Nucleotide and Its metabolomics	153	152.033	[M+H]+	C5H4N4O2	912470	558180	637830	652340	137880	243200	932240	568320	821610	710180	486210	399190	127320	789140	511250	582810	151120	819970	1189800	888340	97677	190960	587740	398300	392500	908840	629660	1179100	935720	438230	476140	430900	1012100	323530	615670	476370	487210	353090	307450	317370	609530	754930
MEDP1093	Allopurinol	Nucleotide And Its metabolomics	Nucleotide and Its metabolomics	137.048	136.038	[M+H]+	C5H4N4O	26281000	28550000	11064000	12231000	18116000	14091000	13077000	5943800	13102000	14808000	9414000	15519000	5626500	24668000	14429000	10190000	10474000	24605000	196340	10547000	10638000	5363100	4538900	5043100	5403200	9281600	9986100	21190000	19344000	14664000	11112000	4707500	7202800	22004000	14502000	10348000	16244000	8958600	7456300	6787900	9964200	16823000
MEDP1096	PC(12:0/12:0)	GP	PC	548.4	565.374	[M-H2O+H]+	C28H56NO8P	3258700	1998200	1068500	1958300	1915700	1917700	1805200	2464700	1352900	2209100	2537700	4064100	1436300	1624800	1493300	1457500	858350	922210	2916000	1631400	3751700	3589100	1669000	866980	3224000	3245700	985660	4113100	1574400	1337100	2106900	940580	2072100	1920800	1959000	2026200	1673100	1771000	3724500	1257500	2434300	3864300
MEDP1100	2-Aminomethylpyrimidine	Nucleotide And Its metabolomics	Nucleotide and Its metabolomics	110.07	109.064	[M+H]+	C5H7N3	1375400	1145100	1028200	954820	1159300	829290	959700	833230	1063200	1084000	1170700	1005200	919760	1145700	998970	1068800	951060	967350	979180	808860	794100	891960	906290	804040	1117100	1058800	877720	1119500	1070400	739210	992760	805440	978050	1120100	925600	892250	871900	751720	798480	934830	992790	1174100
MEDP1106	Lithocholic acid	Bile acids	Bile acids	359.295	376.298	[M-H2O+H]+	C24H40O3	9753.5	50728	13798	123630	33962	58738	24605	32682	9	33360	16077	101180	8211.5	17128	9	22027	39854	9	9	10292	37865	18142	16019	1072.9	9	1839.4	14758	9	16991	16505	425	3137.4	7697.6	29132	9	7703.1	25655	8986	5468.9	9	10482	20111
MEDP1117	7,12-Dioxolithocholic acid	Bile acids	Bile acids	405.258	404.256	[M+H]+	C24H36O5	15085	19391	8506.4	12946	18683	13567	21139	9277.7	1685.7	6974.9	9461.3	14948	1615.1	9263.7	2885.5	11326	8961	5240	11379	6560.9	50276	32109	9626.7	4157.6	29185	19401	4747.8	34737	2204.1	6730.3	7869.7	3004.5	7369.9	18826	12897	7866.4	9461.9	2109.4	4033.2	8987.4	7726.2	14515
MEDP1132	3-Carboxypropyltrimethylammonium	Organic acid And Its derivatives	Organic acid And Its derivatives	146.108	145.11	[M+H]+	C7H15NO2	293670	542280	962430	571900	504370	539730	282820	409240	606060	350560	344650	354230	955200	268440	356570	420020	510420	490500	426960	673870	679490	453290	565070	967010	183870	344560	732120	263240	399770	501180	526360	293290	722900	364610	360610	691600	485540	311340	368630	587240	533930	370010
MEDP1146	LPC(O-18:0/0:0)	GP	LPC	510.4	509.385	[M+H]+	C26H56NO6P	23311000	17275000	14187000	20848000	11034000	10273000	13492000	10171000	16774000	13706000	7747400	8737100	14032000	14038000	12164000	9988800	12899000	8377400	21407000	12234000	7502800	6973200	14533000	8392900	7431300	14106000	7436400	12112000	13763000	7087000	6862200	4669900	8951500	7728600	11330000	14515000	10426000	11083000	7920800	6855600	15469000	15126000
MEDP1159	Hyodeoxycholic acid	Bile acids	Bile acids	375.287	392.293	[M-H2O+H]+	C24H40O4	42888	25118	19309	57927	34509	28319	83081	13472	222800	96210	73508	108340	21839	23867	293240	8281.9	27564	54176	77532	13506	9	20232	20878	87918	28438	381780	33549	251760	9999.1	17578	65875	17824	12017	35505	61708	12107	25513	10690	87168	5102.8	18151	21688
MEDP1161	Creatine phosphate	Nucleotide And Its metabolomics	Nucleotide and Its metabolomics	212.043	211.036	[M+H]+	C4H10N3O5P	82685	92063	56056	84478	68910	112400	76154	58983	72482	100100	95289	93651	117200	87291	90752	55811	103430	82298	62425	66224	68916	62240	47027	45591	45688	100610	69372	56087	86347	54631	88692	76873	97955	53142	70181	52374	54104	69822	76819	87002	87048	99970
MEDP1162	1-Methylguanine	Nucleotide And Its metabolomics	Nucleotide and Its metabolomics	166.071	165.065	[M+H]+	C6H7N5O	1849400	1778700	1625600	2187600	1862500	1782200	2084100	1614600	2461000	1840000	2587000	2185400	1336600	1542100	1615800	1515300	1653200	1528300	1720400	884610	1264400	1305800	1392200	875780	1450200	1996600	1341100	2465500	2176900	1677600	1501300	727900	2471900	1607300	2881400	1932100	1882100	1587600	1345300	1223700	2009200	2238500
MEDP1165	PC(O-16:0/O-2:0)	GP	PC-O	510.4	509.385	[M+H]+	C26H56NO6P	23311000	17275000	14187000	20848000	11034000	10273000	13492000	10171000	16774000	13706000	7747400	8737100	14032000	14038000	12164000	9988800	12899000	8377400	21407000	12234000	7502800	6973200	14533000	8392900	7431300	14106000	7436400	12112000	13763000	7087000	6862200	4669900	8951500	7728600	11330000	14515000	10426000	11083000	7920800	6855600	15469000	15126000
MEDP1177	N-Methyl-α-aminoisobutyric acid	Amino acid and Its metabolomics	Amino acid derivatives	235.2	117.079	[2M+H]+	C5H11NO2	5661100	4919700	5285600	2882500	5732700	4940200	6762600	15316000	4707300	6993900	4094100	3662500	4028500	7546800	5186500	6262100	3894400	3986800	4489300	4141800	5539900	5521700	6878100	6443200	9966800	6378300	5905500	4150100	5419200	5284400	5064600	9061200	4437200	5874700	5040600	4623100	7724800	3454700	5570000	3744100	8166100	3699200
MEDP1183	N-Acetylcadaverine	Alcohol and amines	Polyamines	145.1	144.126	[M+H]+	C7H16N2O	261410	315530	267090	241370	199170	269910	207950	200140	246860	222470	223540	256540	234210	232380	214940	245420	284010	205370	179970	172010	225360	198250	175640	222200	180340	194130	180950	177480	257230	200370	207750	225430	224540	179460	180420	174240	181800	183940	153050	196280	200700	236110
MEDP1196	Biotinamide	Alcohol and amines	Polyamines	244.108	243.104	[M+H]+	C10H17N3O2S	328810	502770	168060	305120	285690	229370	589780	1013400	1076100	718550	386700	664230	238240	303520	232340	226850	109220	503470	508160	689090	216900	344130	264840	250820	269650	445070	314160	613410	603750	380650	306130	363180	305120	400820	171140	405630	427580	221800	195150	118090	492620	642780
MEDP1197	Hypotaurocyamine	Alcohol and amines	Polyamines	152	151.042	[M+H]+	C3H9N3O2S	276400	280980	352860	147120	224940	182960	174920	68015	107610	153840	106260	152930	102900	266560	134750	142470	128820	265320	9265.9	130250	97193	71407	104470	103630	65707	110100	84637	218180	252900	272700	277770	64234	191780	259740	131200	234700	379170	116080	148400	102770	86130	250120
MEDP1215	Indole 3-phosphate	Heterocyclic compounds	Indole and Its derivatives	214.016	213.019	[M+H]+	C8H8NO4P	31830	70314	51640	188740	36389	30547	100600	31459	148670	48538	39382	93204	72061	27686	33105	39732	25220	31706	64008	105160	178140	149870	25679	72063	85825	29513	20594	46914	62649	119470	53102	19678	78394	25487	53329	21483	44853	56313	60001	12741	104150	146990
MEDP1221	PC(O-16:0/O-1:0)	GP	PC-O	496.3	495.369	[M+H]+	C25H54NO6P	436350000	500230000	476080000	501710000	503360000	489250000	489240000	482420000	522120000	498040000	489590000	497890000	449400000	472420000	479420000	480900000	485890000	416120000	531350000	435720000	487810000	501910000	470080000	438560000	500570000	509170000	468230000	503240000	487060000	442250000	475140000	433240000	479850000	445820000	492810000	480270000	498450000	498460000	452050000	463990000	500860000	515580000
MEDP1243	4-Hydroxytryptamine	Tryptamines,Cholines,Pigments	Tryptamines	177.102	176.095	[M+H]+	C10H12N2O	7857500	14823	26048	58717	29014	9306.3	17814	11209	3087.5	25577000	17468000	10555000	107780	12851	79336	2019	31692	16866000	40613	31795	17636000	11266000	27709000	21472	1915000	71576	6718600	18946000	1430700	22553000	26311000	27641	22213	9646.9	12446	46944000	154580	155760	51905	57541	14203	26919
MEDP1246	2,4-diacetamino-2,4,6-triphenoxy-D-mannopyranose	Carboxylic acids and derivatives	Sugar derivatives	247.1	246.122	[M+H]+	C10H18N2O5	448600	358500	270280	533470	617920	341900	267870	279490	371610	342990	289200	607270	469650	368750	208180	176830	344370	360300	221750	270510	191720	257670	246480	108440	148780	428820	219880	468140	494610	344080	239570	147130	288600	189430	274090	320380	244250	319160	297380	175750	325900	332620
MEDP1272	20,26-dihydroxyecdysone	Hormones and hormone related compunds	Hormones and hormone related compunds	497.3	496.304	[M+H]+	C27H44O8	393230000	375820000	326500000	361510000	347560000	344530000	349320000	328970000	392770000	343100000	352020000	365910000	340410000	328960000	334470000	335690000	336020000	310250000	419650000	305580000	341720000	364640000	328750000	268460000	357980000	371770000	310770000	365980000	329760000	275790000	317360000	260490000	324210000	277720000	348160000	334380000	358440000	356010000	297700000	305910000	368100000	398120000
MEDP1276	Guanine	Nucleotide And Its metabolomics	Nucleotide and Its metabolomics	152.056	151.049	[M+H]+	C5H5N5O	48033	29192	33345	13570	18841	43015	27965	23440	18132	18820	14260	13678	19119	62617	18941	10731	15207	33838	5290.9	38729	16988	17311	6816.5	13696	3763.3	12953	21334	22225	22324	30119	32746	9163	11482	21838	11401	20095	66777	8289	21098	25895	11300	45351
MEDP1289	Carnitine C6:0	FA	CAR	260.176	259.178	[M+H]+	C13H25NO4	3792700	3387400	5610700	2256900	1888200	1975600	4352200	3150600	7616100	2113200	8823400	3347700	1758400	1928800	1118700	2732500	1432100	4815600	1500800	2125000	1109500	2819000	2267700	6161300	2521300	3489900	2339500	21171000	3430500	3329700	3613900	1718700	11309000	3042600	3215500	4297200	5290300	3946600	3068400	465680	3859600	3648900
MEDP1294	Leu-Gly	Amino acid and Its metabolomics	Small Peptide	189.114	188.116	[M+H]+	C8H16N2O3	373340	229770	246000	65937	121610	193180	359840	102000	176980	212410	217530	195720	173490	159210	153840	158920	138690	245390	92537	236350	89621	123410	166820	126610	335570	582250	242500	248000	498990	267150	264340	243980	141340	229350	172930	511570	130840	84354	117910	466340	114030	360990
MEDP1318	LPC(0:0/22:4)	GP	LPC	572.363	571.364	[M+H]+	C30H54NO7P	4363800	4613100	1542500	3045800	3530500	3000300	2706600	3982100	4148700	3988000	4134000	4599000	3481500	2312200	3083600	2794400	1577500	1906300	4428200	2820800	4647400	5677000	3208300	1226000	4108900	7270600	1505900	5412000	4221100	2139900	2407800	1755300	3181400	2606400	2967500	2582000	4959200	4821500	2823500	2916500	4192700	7474500
MEDP1319	LPC(22:4/0:0)	GP	LPC	572.363	571.364	[M+H]+	C30H54NO7P	4363800	4613100	1542500	3045800	3530500	3000300	2706600	3982100	4148700	3988000	4134000	4599000	3481500	2312200	3083600	2794400	1577500	1906300	4428200	2820800	4647400	5677000	3208300	1226000	4108900	7270600	1505900	5412000	4221100	2139900	2407800	1755300	3181400	2606400	2967500	2582000	4959200	4821500	2823500	2916500	4192700	7474500
MEDP1321	LPC(0:0/22:5)	GP	LPC	570.347	569.348	[M+H]+	C30H52NO7P	3172200	4538600	1095700	4986200	2619100	2497000	3484200	5468200	5054200	4736400	4611000	4829100	2350200	2453100	2352000	3195700	1245300	1379500	4966100	4284300	3174500	6004300	4136300	1796700	6494600	10100000	1342900	6124800	5755400	1094400	2172800	2592800	7804700	2220600	1263000	1518900	3477000	3859600	1963500	1949300	7486900	7125800
MEDP1322	LPC(22:5/0:0)	GP	LPC	570.347	569.348	[M+H]+	C30H52NO7P	22411000	14004000	10840000	13531000	20883000	12942000	6491000	13148000	14378000	13554000	16714000	23572000	11573000	10201000	11511000	20621000	10123000	6517900	20260000	8395200	23660000	30117000	8637200	4337900	13323000	12127000	8086100	16671000	19489000	7789300	14310000	4199300	12508000	7229100	16738000	17869000	19619000	11281000	22874000	7865900	15011000	20991000
MEDP1326	LPC(20:1/0:0)	GP	LPC	550.37	549.379	[M+H]+	C28H56NO7P	14579000	13885000	14399000	24459000	13196000	12253000	11257000	10426000	26877000	18748000	9229900	12509000	14264000	15001000	10194000	10316000	12351000	9093500	27187000	6315900	5990200	10898000	5474500	6016700	8367600	11592000	6204100	9345900	8032900	8032200	7393300	4671200	7834100	6890400	11424000	15374000	19314000	16197000	9527400	8737100	16280000	11115000
MEDP1328	LPC(20:2/0:0)	GP	LPC	548.362	547.364	[M+H]+	C28H54NO7P	23669000	24791000	16641000	30446000	23754000	32287000	19302000	23122000	27634000	21222000	23470000	24492000	23931000	19945000	17714000	21937000	21257000	18134000	49860000	11555000	11988000	23515000	10648000	8102600	17166000	22553000	16639000	19651000	13993000	10420000	15962000	13618000	18065000	7145000	22523000	28230000	39324000	31333000	18749000	15762000	22618000	24905000
MEDP1330	LPC(0:0/20:2)	GP	LPC	548.362	547.364	[M+H]+	C28H54NO7P	23669000	24791000	16641000	30446000	23754000	32287000	19302000	23122000	27634000	21222000	23470000	24492000	23931000	19945000	17714000	21937000	21257000	18134000	49860000	11555000	11988000	23515000	10648000	8102600	17166000	22553000	16639000	19651000	13993000	10420000	15962000	13618000	18065000	7145000	22523000	28230000	39324000	31333000	18749000	15762000	22618000	24905000
MEDP1331	LPC(0:0/20:3)	GP	LPC	546.347	545.348	[M+H]+	C28H52NO7P	36267000	31561000	23473000	23404000	32285000	32793000	28261000	30054000	22545000	35927000	29595000	46503000	23413000	27129000	23206000	23551000	17446000	16673000	33869000	27420000	43302000	42310000	25999000	13408000	38056000	34810000	16279000	43429000	24238000	20303000	32805000	15377000	31163000	29480000	22382000	32128000	27082000	24081000	42025000	20166000	29623000	43263000
MEDP1332	LPC(20:3/0:0)	GP	LPC	546.347	545.348	[M+H]+	C28H52NO7P	36267000	31561000	23473000	23404000	32285000	32793000	28261000	30054000	22545000	35927000	29595000	46503000	23413000	27129000	23206000	23551000	17446000	16673000	33869000	27420000	43302000	42310000	25999000	13408000	38056000	34810000	16279000	43429000	24238000	20303000	32805000	15377000	31163000	29480000	22382000	32128000	27082000	24081000	42025000	20166000	29623000	43263000
MEDP1333	LPC(0:0/20:4)	GP	LPC	544.331	543.332	[M+H]+	C28H50NO7P	214200000	135000000	87442000	128610000	146510000	132150000	96239000	168460000	152460000	167340000	159630000	203480000	164320000	122040000	116610000	153780000	99257000	93212000	169900000	129330000	158240000	180580000	126590000	74034000	164970000	206220000	123260000	178330000	194180000	128460000	118360000	69276000	128340000	92188000	119480000	153680000	173600000	148900000	145790000	82080000	193200000	196000000
MEDP1334	LPC(20:4/0:0)	GP	LPC	544.331	543.332	[M+H]+	C28H50NO7P	214200000	135000000	87442000	128610000	146510000	132150000	96239000	168460000	152460000	167340000	159630000	203480000	164320000	122040000	116610000	153780000	99257000	93212000	169900000	129330000	158240000	180580000	126590000	74034000	164970000	206220000	123260000	178330000	194180000	128460000	118360000	69276000	128340000	92188000	119480000	153680000	173600000	148900000	145790000	82080000	193200000	196000000
MEDP1335	LPC(20:5/0:0)	GP	LPC	542.316	541.317	[M+H]+	C28H48NO7P	352720	300130	134830	268470	250010	140880	142890	203190	267120	176930	91168	427300	150000	212280	114270	175930	150690	122060	283060	111530	192850	302100	161860	53960	265080	199310	137680	265710	230460	105530	159500	64945	210760	87254	209190	257830	155850	211140	309760	93651	304800	472090
MEDP1336	LPC(0:0/20:5)	GP	LPC	542.316	541.317	[M+H]+	C28H48NO7P	372390	308010	148800	306300	263060	151060	110810	172860	215060	212130	107150	398960	169030	231960	148060	154470	146370	135940	327560	155190	203990	268200	187230	91215	254260	219990	101950	279260	271420	81241	174540	47894	203330	83270	227540	179010	306900	206770	334590	39720	279320	507820
MEDP1337	LPC(18:0/0:0)	GP	LPC	524.363	523.364	[M+H]+	C26H54NO7P	433210000	400660000	385300000	405140000	390990000	383920000	384830000	377190000	413340000	386570000	382090000	387660000	382910000	377610000	371860000	389580000	352090000	346720000	433820000	321620000	354750000	382170000	365310000	265860000	375830000	401260000	342140000	387900000	348040000	284220000	318820000	280970000	332460000	278510000	381280000	378190000	385350000	393090000	338870000	344050000	388370000	407800000
MEDP1339	LPC(18:1/0:0)	GP	LPC	522.347	521.348	[M+H]+	C26H52NO7P	354120000	338050000	301660000	350530000	348720000	335230000	293700000	329750000	348420000	346200000	332030000	356620000	335020000	312780000	308520000	292490000	328290000	347270000	335370000	282030000	320990000	366600000	277660000	239340000	329190000	336050000	273850000	317890000	309320000	287660000	295990000	234330000	349930000	247600000	336320000	330160000	467650000	337560000	332060000	290580000	355460000	323810000
MEDP1341	LPC(18:2/0:0)	GP	LPC	520.33	519.332	[M+H]+	C26H50NO7P	407290000	401040000	352450000	394100000	399230000	396750000	368660000	374980000	405080000	405350000	401800000	417830000	391570000	368620000	357430000	361400000	405930000	372760000	403940000	357750000	394120000	401180000	381460000	335940000	385120000	372600000	374880000	380440000	363780000	349650000	362550000	342610000	363320000	305840000	395310000	393320000	389470000	427520000	378620000	363100000	388710000	382150000
MEDP1343	LPC(0:0/18:3)	GP	LPC	518.316	517.317	[M+H]+	C26H48NO7P	166420	138700	60622	265690	141760	148630	105750	238170	496950	249110	193480	187060	111520	187120	120620	382490	183340	124010	369460	67525	111720	139150	177710	67713	156480	114370	136620	195510	300520	74735	53673	157600	371150	56380	48749	218500	103100	104470	79221	109670	586450	111830
MEDP1345	LPC(18:3/0:0)	GP	LPC	518.316	517.317	[M+H]+	C26H48NO7P	160410	214440	99090	337150	155600	142650	145960	301640	502310	295740	196810	205320	116870	281160	161770	606150	212050	172700	367730	159780	130790	144090	210210	110770	230760	133600	185890	226390	378210	171710	82551	204410	533380	95120	55695	261770	95147	100300	108870	133010	522260	118600
MEDP1346	LPC(0:0/16:0)	GP	LPC	496.331	495.332	[M+H]+	C24H50NO7P	498140000	496990000	468690000	490920000	493120000	478190000	483090000	473190000	508370000	486120000	486820000	494590000	484210000	470570000	473570000	472340000	472000000	459160000	516110000	449640000	476440000	491700000	466460000	394780000	490230000	498660000	459480000	494160000	478190000	431800000	457750000	424040000	468640000	436530000	474090000	467060000	484020000	482700000	440440000	456540000	484240000	501920000
MEDP1370	Carnitine C24:2	FA	CAR	508.4	508.436	[M+H]+	C31H57NO4	7571.7	5831.8	4272.8	5090.6	4351.3	4655.1	4574.9	3648	7959.3	7596.7	2094	6526.4	4768.1	8012.5	5873.5	2513.7	4315.4	5218.8	13821	3593.3	6074.5	4723.3	4800.1	4887.5	3221.6	4624	3150.2	3283.1	4437.5	2640.2	2979.9	394.75	2105.1	1697.8	5560.7	8168.3	5294.7	5314.8	4920	2170.8	8258.6	5751.3
MEDP1373	Carnitine C22:2	FA	CAR	480.405	480.405	[M+H]+	C29H53NO4	229350	219880	107720	200580	208920	160090	112020	130730	265350	215120	169180	277010	146700	133620	127410	108600	203190	124690	291550	102580	247800	204280	150760	74096	199200	156940	107480	155470	163110	106200	120940	80745	102860	77373	179340	217720	182660	256690	328380	150350	176900	185110
MEDP1375	Carnitine C20-OH	FA	CAR	472.3	472.342	[M+H]+	C27H53NO5	19744	16396	12103	14083	15079	5373.6	12256	6402.6	17626	21308	7004.2	18615	8420.1	5766.7	6655.3	9985.9	3486.1	6199.6	6905.1	7117.4	6216.2	15196	9656.7	6851.1	7429	15230	10220	13422	9148.8	6793.5	8221.2	6149.2	11642	2479.4	7549.9	10227	12690	17945	9264.8	4407.5	10241	16735
MEDP1377	Carnitine C20:1-OH	FA	CAR	470.384	470.384	[M+H]+	C27H51NO5	10695	6368.2	2391.5	4130.9	5974.2	3627.4	7943.4	4955	22280	12635	7636.6	13974	9558.2	8707.3	3114.9	3773.9	5272.6	3388.3	4800.1	7820.4	8975.9	16604	15916	5719.4	5930	11056	3384.4	12781	9399.7	6644.9	6531.3	1759.2	13661	11922	11926	10499	7547.7	12816	10071	2914	14718	13760
MEDP1382	Carnitine ph-C14	FA	CAR	448.342	448.342	[M+H]+	C27H45NO4	793200	577130	259640	337090	508470	570450	861880	448680	772540	382220	633270	516690	462930	377190	431980	796200	258660	314100	316230	606800	278840	246990	305790	132720	279580	764920	550770	607780	723730	478500	285140	144530	219740	519000	446670	547940	622260	339990	206710	320360	802160	653030
MEDP1383	Carnitine C20:5	FA	CAR	446.311	446.311	[M+H]+	C27H43NO4	15903	25662	11670	18930	13197	14473	15190	16085	27321	14620	16395	11896	10203	19301	13204	12212	17053	14390	14454	9839.5	15307	16438	14928	13755	15600	19861	20095	19461	11501	14736	13621	16157	21224	12639	17287	15577	16979	11152	20068	15500	12306	17377
MEDP1385	Carnitine C17:1:DC	FA	CAR	442.4	442.353	[M+H]+	C24H43NO6	131840	105160	80912	72429	63402	61375	118840	109340	292170	86278	138470	104380	81291	68950	69560	58224	54906	70279	63704	80691	37410	157650	109000	90379	98954	119170	54802	131180	118000	87797	120110	39401	181910	160590	101350	105150	123070	109680	83097	21486	169390	221970
MEDP1386	Carnitine C18:2-OH	FA	CAR	440.337	440.337	[M+H]+	C25H45NO5	114280	105770	64112	80310	45993	71318	138520	110870	201420	74290	176200	97059	77184	63268	47895	67497	69701	74568	59520	51794	30147	66725	84465	65018	81002	104180	56367	115850	99434	68851	106830	60066	178610	96645	89874	103840	119430	98862	52617	31786	113790	159570
MEDP1393	Carnitine C18:4	FA	CAR	420.311	420.311	[M+H]+	C25H41NO4	85966	64119	51248	38487	36723	49749	60935	57299	78815	50408	77377	56451	38698	29426	22668	58324	26220	44091	27531	31225	21709	61544	62820	32624	32652	63396	36066	51746	55276	33388	41026	18633	60101	50783	35415	68922	58931	38586	24988	9034.9	80953	74472
MEDP1394	Carnitine C15:DC	FA	CAR	416.339	416.339	[M+H]+	C22H41NO6	184630	137940	103790	93017	105630	97635	214820	167180	281920	133630	173630	145060	84237	82470	72134	82328	75158	89155	94025	120930	85497	196690	141500	102630	110210	157430	89593	218300	153320	91022	128860	54884	179030	159570	152480	117470	123750	91361	95959	48177	137730	235930
MEDP1396	Carnitine C15:1:DC	FA	CAR	414.4	414.358	[M+H]+	C22H39NO6	48344	21038	50111	7627.3	59888	12038	84818	11511	53429	63999	44953	38066	26241	6000.3	54915	4880.3	30356	20893	89102	874.91	4187.9	44642	4906.9	39758	8648.9	63996	20878	142170	19782	15840	43118	8756.9	4841.7	22247	76083	17290	27457	16404	63298	9734.8	12028	6689.9
MEDP1398	Carnitine C16:1	FA	CAR	398.326	398.326	[M+H]+	C23H43NO4	75143	75340	48204	36331	54218	43339	62607	74277	157030	46212	85141	69294	47580	37163	29838	53989	24912	35077	31488	63523	49409	92594	83096	60925	67779	68246	31166	109430	67095	30506	55509	4269.8	119670	84560	49804	60706	65519	37997	57034	14630	99862	111040
MEDP1400	Carnitine C16:3	FA	CAR	394.295	394.295	[M+H]+	C23H39NO4	158800	130150	71353	105070	90330	89984	135530	186130	206100	126980	237690	139540	88160	95900	45547	84243	31680	53816	81527	102690	84278	110360	107890	56373	116370	164320	86935	119920	154990	114960	107530	69881	157790	134860	51504	108170	150510	98735	82189	22709	186630	171900
MEDP1401	Carnitine C14-OH	FA	CAR	388.307	388.307	[M+H]+	C21H41NO5	545250	451610	297030	304700	238420	201990	591360	567230	1245500	430490	566240	448820	271200	319220	229280	284180	150780	289350	287410	366590	225390	504640	416640	363160	350570	598650	286940	611500	603100	288750	406300	182790	566800	491350	254650	335250	444860	291470	301780	70189	710150	583620
MEDP1403	Carnitine C15:1	FA	CAR	384.311	384.311	[M+H]+	C22H41NO4	541600	344130	208590	95924	96574	89854	225530	208300	1766200	269300	470610	267600	124400	244060	135960	114840	111420	223870	129540	276360	129250	180090	686530	136490	136340	290530	80058	282130	423960	123540	302200	61543	507630	132300	141020	223380	167040	125960	202890	12688	393490	361290
MEDP1404	Carnitine C14:2-OH	FA	CAR	384.274	384.274	[M+H]+	C21H37NO5	380660	303040	271030	329370	133540	193960	524050	403530	756130	295700	774440	302020	225830	277870	122690	261460	194270	318740	209360	241330	91660	251920	309820	255610	288640	371770	229100	341930	386900	192900	342200	299390	541450	253040	170430	343060	465750	276080	214220	38842	412590	296410
MEDP1407	Carnitine C14:2	FA	CAR	368.279	368.279	[M+H]+	C21H37NO4	260580	153790	138060	147130	121120	82087	335600	296640	933500	276370	265300	158480	141840	148900	88276	126960	50329	180480	129080	174050	74665	306590	254370	148120	195050	319080	387930	216880	340050	186810	289900	113140	305650	337760	80622	509390	268210	180480	174190	28265	466350	321880
MEDP1408	Carnitine C14:3	FA	CAR	366.264	366.264	[M+H]+	C21H35NO4	492750	245940	579760	255570	310500	349290	532750	428780	499800	264300	485040	447700	166480	319890	118460	533980	248080	610130	287220	162080	132430	272220	287790	221580	175610	101300	302360	204530	564670	132580	286280	151570	488080	159090	265670	942150	383580	115100	487630	24038	436560	163460
MEDP1409	Carnitine C12-OH	FA	CAR	360.3	360.276	[M+H]+	C19H37NO5	733650	417460	449430	433740	267680	226120	749440	588760	1724600	467730	826030	528000	329930	382310	220170	371840	197980	456180	329450	511320	178330	618970	563200	510310	459170	705700	297870	724940	721860	345140	579220	329590	771470	557200	269450	536500	634200	348610	401990	55278	765120	622120
MEDP1410	Carnitine C11:DC	FA	CAR	360.3	360.276	[M+H]+	C18H33NO6	710860	399800	466590	424660	267200	218040	730720	586100	1641800	489960	813810	499030	308290	429240	213000	376640	186040	508030	337860	508700	175170	636510	526610	463660	441730	685470	306060	708770	765960	354280	563980	311820	758500	527380	260080	521190	595710	334930	391180	61041	758130	609090
MEDP1411	Carnitine C13:0	FA	CAR	358.259	358.259	[M+H]+	C20H39NO4	4608800	1402500	1070200	816500	751880	649890	3196800	921490	19318000	2075300	3206400	4264400	904830	4118500	1589300	439630	517170	1586400	2052800	2237500	894240	1647200	5448500	640460	1132700	2901800	435120	2162600	3422200	1238200	1416600	296050	491720	1098400	1139200	1351600	1184500	896740	513070	110240	3567700	2457200
MEDP1414	Carnitine C12:1	FA	CAR	342.264	342.264	[M+H]+	C19H35NO4	1782900	1047300	1112900	960160	687510	621510	1778600	1661200	3539200	1229800	1910100	1149500	775100	1032800	536090	816900	428500	1003700	901430	1234700	393890	1307300	1302100	939320	1178400	1856500	739490	1660300	1834500	883090	1265100	711480	1931400	1429300	551040	1424500	1708500	794550	862450	103750	1700700	1480800
MEDP1415	Carnitine C9:DC	FA	CAR	332.2	332.2	[M+H]+	C16H29NO6	25428	37976	20058	15676	20660	15061	24070	19223	33359	22584	60660	31037	8592.9	13290	7509.3	16684	15284	55520	11404	12400	16171	22558	24900	19697	37527	19328	20196	50584	22572	15177	27017	10372	26426	16896	21513	45118	43593	25462	28990	12792	37841	18553
MEDP1416	Carnitine C11:0	FA	CAR	330.264	330.264	[M+H]+	C18H35NO4	326230	186540	303160	113100	109610	112560	213450	191960	888230	164640	472470	203420	74460	144370	72059	116850	69300	221280	71806	210600	71241	167030	206540	208250	106110	214710	103060	282220	224540	155740	210020	83063	278690	139950	149730	235260	233640	147780	119750	15550	232530	178350
MEDP1417	Carnitine C10:1-OH	FA	CAR	330.2	330.2	[M+H]+	C17H31NO5	21078	73404	7207.9	180220	6768.8	25316	22606	108590	6512.7	12783	17830	182810	20139	15530	7907	8968.8	48901	3541.7	150050	33054	68009	19797	13600	16276	51098	74712	22188	87300	53733	47998	6578.8	43229	1530.9	5769	153050	6231.8	62936	41739	3147	158170	1610	58975
MEDP1419	Carnitine C10:0	FA	CAR	316.25	316.25	[M+H]+	C17H33NO4	32060000	24999000	46137000	17246000	14275000	14436000	25617000	25571000	75798000	17360000	63429000	20754000	9319200	15560000	7230000	14993000	8711800	34314000	7570100	15683000	5533100	18527000	15514000	36189000	11773000	20171000	10204000	67676000	24423000	19877000	25054000	11471000	53811000	17059000	19121000	30017000	32433000	21475000	14102000	1110800	21649000	15394000
MEDP1422	Carnitine C8-OH	FA	CAR	304.2	304.2	[M+H]+	C15H29NO5	2633200	1536300	1784800	2490400	1081000	1026000	3328600	2906100	6946700	2220300	3657000	2231300	1477100	1688200	864010	2350200	991720	3416200	1457000	2376600	668070	2728700	2894300	2215200	1915500	3875300	1643700	2516600	3971400	1479200	2868700	2184800	3793100	2322000	1140900	3533800	3194100	1721200	1986400	292220	3720500	2374900
MEDP1424	Carnitine C9:0	FA	CAR	302.2	302.233	[M+H]+	C16H31NO4	527430	271380	507720	180420	164510	197850	290210	264160	1109500	219860	727100	306630	98266	174040	112990	152650	84769	428660	114570	238690	99992	219420	225760	393440	118610	285700	123390	1162200	316660	251850	240530	101260	358430	174540	243270	353530	343500	213280	170000	16985	302270	234700
MEDP1425	Carnitine C7-OH	FA	CAR	290.2	290.2	[M+H]+	C14H27NO5	15246	8783.8	11437	12091	10055	8198.1	14895	14133	32139	18941	8512.4	12604	11507	14737	14013	5040.8	6137.4	11097	13747	16832	4661	11345	22113	12725	10993	14449	11562	9809.3	38910	11123	14775	6109.5	15347	15247	9157.2	21939	20564	9050.3	10541	4217.5	25156	17722
MEDP1427	Carnitine C8:0	FA	CAR	288.144	288.144	[M+H]+	C15H29NO4	7315000	5270700	9820300	4483100	3224900	3983500	6475000	6090100	17631000	4067400	17263000	5396200	2557700	3648400	1908000	4131300	2338700	10626000	2217500	3698100	1385500	4451800	3595400	10965000	3048400	5484500	2896900	28966000	5639900	5725200	5881000	3730700	14348000	4211800	5047400	7404900	9363800	6113300	3525300	367430	5472500	3887600
MEDP1428	Carnitine C8:1	FA	CAR	286.201	286.201	[M+H]+	C15H27NO4	58143000	27288000	67060000	52751000	51142000	37744000	52454000	47515000	49129000	32156000	68152000	76357000	19575000	31029000	16212000	77159000	26372000	71480000	38089000	11874000	14771000	25346000	37242000	22889000	41888000	30834000	49418000	43461000	65005000	34398000	29482000	20742000	36853000	11657000	59955000	66911000	37179000	39189000	17688000	8235200	45879000	21340000
MEDP1430	Carnitine C7:0	FA	CAR	274.165	274.165	[M+H]+	C14H27NO4	30292	16500	24921	13482	12897	12169	20180	14441	59759	15419	40694	23925	7753.4	14854	10563	9827	10280	31586	10438	18699	6586.3	13129	17224	25837	11950	17967	8499	92337	21555	20629	19511	5930.3	30039	9114.7	16303	27452	22759	16508	12027	2854.3	24346	19728
MEDP1431	Carnitine C7:1Isomer1	FA	CAR	272.186	272.186	[M+H]+	C14H25NO4	232670	130750	360640	485800	391680	201880	180300	260950	709020	221020	375940	299120	114640	208870	58470	889140	50920	203210	119380	52192	38164	86784	232310	128650	192040	217030	165520	150970	254470	171990	142300	151190	251290	42721	331680	238360	179020	279230	52722	136600	280800	148180
MEDP1432	Carnitine C7:1	FA	CAR	272.186	272.186	[M+H]+	C14H25NO4	205800	143260	384110	506390	411990	232460	176820	274760	751140	195800	399770	298920	100590	185100	84458	889690	70313	208260	123610	42855	26724	77481	225250	128080	193710	211670	166470	164520	269150	164210	167030	148940	238820	27642	342690	243460	162960	293240	42490	127780	265000	147530
MEDP1433	Carnitine ph-C1	FA	CAR	266.139	266.139	[M+H]+	C14H19NO4	45491	89868	73730	119970	32664	174680	178000	330130	158340	73869	139770	137250	34458	132820	31514	316570	22064	30140	30943	51828	81220	21669	61954	13686	39521	66448	200770	25986	107970	91735	41030	54154	21652	85977	20542	96659	94763	62945	13734	82625	32674	96837
MEDP1434	Carnitine C4:DC	FA	CAR	262.128	262.128	[M+H]+	C11H19NO6	57449	62098	41090	13293	33291	73925	67724	22875	66650	72376	83011	85507	23855	33082	14665	11630	24054	11634	47772	19426	34072	27840	60305	29158	58791	14583	20715	37147	49328	24299	57597	19416	29931	50992	62517	44374	73504	31463	52641	34263	59855	74522
MEDP1440	Carnitine C5:0	FA	CAR	246.163	245.17	[M+H]+	C12H23NO4	4100600	8313100	1514900	859510	2370300	2098800	2552100	2540300	4753300	5549900	3631800	4357800	2088200	978420	1177100	1530300	924290	6110600	3548600	2477700	3367200	2864900	2208300	1196500	3118400	2363100	2363300	4090500	4658500	2429200	4164100	1050400	1761800	2590200	1690700	3635000	1303300	1581900	1728600	1075700	2525800	2674700
MEDP1441	Carnitine C5:1	FA	CAR	244.154	244.154	[M+H]+	C12H21NO4	280850	393820	131130	190610	204660	189650	385310	599410	831980	503950	285240	475590	202650	248350	170910	148690	94909	397730	421470	483960	124120	240050	183790	156500	208460	343180	307900	469420	351600	256460	220440	211530	266680	269490	132280	292370	300980	158520	156330	104010	339380	424620
MEDP1442	Carnitine C4:0	FA	CAR	232.147	232.154	[M+H]+	C11H21NO4	5002100	8549100	8669500	8682800	8035000	6518800	8340400	11485000	11122000	20336000	10166000	12727000	6821500	6807200	5938400	7621400	4092300	9653400	10632000	7406400	6826200	4524300	5572500	3275300	4820900	6234800	11311000	11111000	9606000	10564000	8212000	3446700	7663800	6144400	7734700	10868000	13043000	7345700	8725000	4379800	6870600	12762000
MEDP1444	FFA(18:5)	FA	FFA	275.2	274.193	[M+H]+	C18H26O2	44267	109750	110230	13442	48190	128310	30040	25802	188600	16446	94856	32923	86809	20593	36083	7496.7	1026000	225530	46802	27002	49535	25952	15475	5640.3	16303	28783	127210	173320	32604	89243	28511	23911	110030	26098	5596.4	102500	37594	173560	51401	10609	35112	39430
MEDP1458	FFA(22:7)	FA	FFA	327.2	326.224	[M+H]+	C22H30O2	276680	284730	101260	187710	176280	138690	161220	91412	494370	62046	109750	139500	192740	343370	110780	185980	221980	134030	85797	43541	47179	79814	92245	63211	55487	78963	41588	241900	134310	528620	128460	85368	192280	59132	157710	105770	38891	177050	30425	67654	132020	370900
MEDP1466	Ureidosuccinic acid	Amino acid and Its metabolomics	Amino acid derivatives	177	176.13	[M+H]+	C5H8N2O5	82416	111260	75463	71638	79207	89244	99958	57022	126780	77298	128440	89031	73454	93309	10391	99547	89395	35457	89046	61085	75863	24095	52848	39146	88017	92221	87962	89794	133540	90626	74527	12552	94658	97748	83726	96842	63608	25946	53809	98079	98207	106340
MEDP1468	Pantothenol	CoEnzyme and vitamins	CoEnzyme and vitamins	206	205.25	[M+H]+	C9H19NO4	238180	6743	10176	25566	7116.5	12476	58821	9540.7	24771	14399	15467	10176	8432.2	63402	22248	18830	9884.2	10084	17835	26621	3219.7	18747	2360.7	13713	11213	107800	13704	23469	15350	13126	12364	13171	32790	11797	2649.7	57001	10121	21594	12980	15990	8053	7416.7
MEDP1472	N'-Methyl-2-pyridone-5-carboxamide	Heterocyclic compounds	Pteridines and derivatives	153	152.059	[M+H]+	C7H8N2O2	3793200	1682500	1777100	2301400	628770	713020	3628500	2065800	3533100	2419700	2038600	1332000	788680	2488900	1822900	1678600	786120	2834200	4408100	2933000	419520	642480	2026900	1299200	1292700	3329800	2352100	4676300	3355800	1222800	1758800	1364200	3490500	1302000	2070100	1465200	1410100	878610	1183700	1115500	2125200	2308100
MEDP1479	Theophylline	Heterocyclic compounds	Heterocyclic compounds	181	180.065	[M+H]+	C7H8N4O2	9733.3	47698000	1713800	10068000	27683000	9300.7	21128000	486260	61044000	77285	26995000	141350000	33927000	157280	25767000	848450	27062	32348000	211290	524960	20515000	21426000	19919000	117170	15398000	64694000	6546700	20767000	29229000	31449000	19957	5517.4	10303	6783400	13202	18925000	16648000	7476.5	3626600	521890	18004000	2760200
MEDP1488	SDMA	Organic acid And Its derivatives	Organic acid And Its derivatives	203	202.25	[M+H]+	C8H18N4O2	412320	691740	794990	518820	660260	462610	403740	273700	453150	353000	388270	535200	585170	369930	349240	434550	497460	374640	459580	334540	523050	348010	508970	396760	331400	407700	417680	380920	501560	351970	574410	254290	747210	340800	545570	705590	427330	514130	393250	369840	491550	559970
MEDP1490	Cis-4-Hydroxy-D-Proline	Amino acid and Its metabolomics	Amino acid derivatives	132	131.058	[M+H]+	C5H9NO3	374640	682530	273050	405860	1056700	233340	456470	384540	811080	895740	389740	896930	417310	242100	553120	302260	474430	612570	574370	476500	415760	342720	612460	451910	291790	1975000	440590	702060	453310	1004400	320640	314980	408320	191190	414180	632710	1735800	1139400	1269700	299490	467660	428130
MEDP1491	Methylguanidine	Alcohol and amines	Amines	74.07	109.56	[M+H]+	C2H8ClN3	12951	24526	15677	17379	21492	13290	10912	14987	12283	11589	11243	57244	11614	20788	22152	22844	24876	12266	15670	12617	24877	17937	17053	21672	20444	31018	20106	20782	20798	18400	15336	13015	29426	9882.3	30823	14646	11933	20604	11251	40563	17597	20439
MEDP1493	N6-methyladenosine	Nucleotide And Its metabolomics	Nucleotide and Its metabolomics	282.119	281.112	[M+H]+	C11H15N5O4	444790	419700	627510	360320	207560	570620	334130	406570	399440	793020	509560	306460	284960	249990	306640	430480	196490	372910	791600	441160	324230	168040	475030	286040	421710	676740	825020	590260	717440	348020	859880	364360	864420	479120	294840	1006000	789080	276470	285860	222570	410050	566060
MEDP1498	8-Azaguanine	Nucleotide And Its metabolomics	Nucleotide and Its metabolomics	153	152.11	[M+H]+	C4H4N6O	5301800	5801800	2914800	3837700	4078300	2832200	3384700	2445200	2904200	3600500	3217500	2599700	2406200	4158200	2472600	3936800	2982100	3983900	2976500	2023300	1794300	2258100	3331300	1514600	2688200	5377400	2876600	4363100	3809500	3818000	5053400	1867600	4180100	6949400	3702800	2496800	2635900	2644800	1302400	2087400	1716000	6113000
MEDP1500	16-Dehydroprogesterone	Hormones and hormone related compunds	Hormones and hormone related compunds	313	312.209	[M+H]+	C21H28O2	126560	91824	66104	118410	116190	86227	70217	85083	126070	75542	76179	121030	74008	82304	68421	58194	84806	37261	160010	59910	123970	121490	72485	39642	119230	59755	37817	92865	78597	26897	76261	23293	70461	58032	101070	67140	94022	71111	200200	64227	89232	160740
MEDP1506	Leu-Val	Amino acid and Its metabolomics	Small Peptide	231	230.163	[M+H]+	C11H22N2O3	8416.9	16126	14848	26346	41921	16689	9915.8	13387	21806	13482	24117	20303	14596	5990.2	22232	31550	4144.5	1347.3	12515	9800.4	9798.5	10598	30590	2765.7	7859.5	21906	22325	35887	13083	28215	17820	11511	21527	20210	15100	34842	14727	11340	16511	14149	22927	15042
MEDP1507	Phe-Asn	Amino acid and Its metabolomics	Small Peptide	280	279.122	[M+H]+	C13H17N3O4	220510	156190	1633200	332590	821660	273600	137390	571050	411660	320300	222830	728380	400420	280620	308030	314300	220240	89670	173580	268850	449390	111770	652360	386420	220740	133240	421170	381930	466470	225090	69910	135160	155650	41880	307930	404280	392510	309460	251420	88294	380140	135920
MEDP1508	Phe-Met	Amino acid and Its metabolomics	Small Peptide	297	296.119	[M+H]+	C14H20N2O3S	190380	179180	190650	158020	262840	174970	146840	132930	281360	190000	194140	216810	137990	190900	130750	164060	130810	87591	69627	107320	108000	149210	190060	98589	113810	164350	144570	208680	244390	167700	103910	87430	193300	75739	173590	174570	169980	141570	103440	62250	160670	151480
MEDP1509	Glu-Met	Amino acid and Its metabolomics	Small Peptide	279	278.094	[M+H]+	C10H18N2O5S	545330	442830	424650	299820	465110	282570	272210	338320	235020	565670	369030	502370	195970	307580	275310	320090	181050	418660	350000	307210	461260	310310	698540	417810	605090	663960	432270	615420	580490	369790	629240	351580	678390	671860	252390	576500	716720	250640	670320	243920	901720	597490
MEDP1511	Met-Glu	Amino acid and Its metabolomics	Small Peptide	279	278.094	[M+H]+	C10H18N2O5S	545330	442830	424650	299820	465110	282570	272210	338320	235020	565670	369030	502370	195970	307580	275310	320090	181050	418660	350000	307210	461260	310310	698540	417810	605090	663960	432270	615420	580490	369790	629240	351580	678390	671860	252390	576500	716720	250640	670320	243920	901720	597490
MEDP1513	Carnitine C9:1	FA	CAR	300.217	299.21	[M+H]+	C16H29NO4	2156600	722000	542060	994410	478740	442630	769140	849030	8102400	894390	1331500	1740500	590520	959300	833450	293010	359860	548210	973040	862740	364950	637220	2074100	529910	869590	2428000	311990	1396300	1963600	621520	610710	621010	347480	346780	887230	673450	848800	764640	186790	262820	1417000	1667300
MEDP1515	Carnitine C10:2	FA	CAR	312.217	311.21	[M+H]+	C17H29NO4	3624900	2202300	4106400	2365200	2903000	3236300	3965500	3505000	2573500	1861100	4942300	3451800	1515700	2036100	1147400	3084400	1753500	4200000	2218500	1092300	1282700	1740000	2055100	1264400	1440700	1061400	3084600	871950	3671800	1708300	2126300	1295300	1997000	1131100	1446700	6947300	2744100	1094400	2344200	281240	2996000	1130500
MEDP1516	Carnitine C10:1 Isomer1	FA	CAR	314.233	313.225	[M+H]+	C17H31NO4	7566900	7124200	4100800	7269100	3284200	4841000	11325000	10461000	9085600	5310600	11866000	6671600	4296900	4461300	2297000	3934600	2380500	3748300	4169200	4780300	1831500	3971900	5306500	3760600	5285400	6587800	5541000	5212000	7610800	4632500	4178200	4491700	8170000	4760900	2597400	5745500	7838500	4554500	2996400	755440	7181900	5524400
MEDP1517	Carnitine C10:1	FA	CAR	314.233	313.225	[M+H]+	C17H31NO4	7378100	6867100	4315500	7274000	3234500	4994200	10989000	10767000	9329400	5204800	12590000	6568800	4439700	4432600	2197900	3760400	2416200	3746600	4205500	4619500	1788200	4253700	5402900	3895800	5526100	6592000	5631100	5552300	7599800	4628900	4223400	4735100	8232700	4697500	2697500	5940700	7780200	4530300	3063300	697230	7078400	5359400
MEDP1519	Carnitine C12:3	FA	CAR	338.233	337.225	[M+H]+	C19H31NO4	1272200	654750	1431400	829090	949060	793610	946290	1101900	1214500	731350	1804900	1313700	452900	519030	422170	1410700	470560	1757000	837490	282730	324390	627950	864880	398750	453750	223140	729330	813480	1011600	416610	694080	323030	792610	307060	716460	1511500	838200	444720	450750	35348	972480	302840
MEDP1521	Carnitine C14:2 Isomer1	FA	CAR	368.279	367.272	[M+H]+	C21H37NO4	261310	222440	160190	135090	121180	72294	274350	295310	794440	216460	284600	137330	170590	170680	80949	125060	69927	161800	115120	188180	90153	260500	211410	128130	208780	261390	365080	206310	369180	167060	285870	98381	309180	322290	87807	547750	256500	151510	163190	28383	472470	267700
MEDP1525	Carnitine C14:2:DC	FA	CAR	398.254	397.246	[M+H]+	C21H35NO6	69157	65932	31865	26845	48223	37661	55226	57922	181270	57562	82808	56758	35523	36550	16504	24483	21051	41960	49450	60289	43003	97032	45247	39472	40741	54828	27460	72261	65647	28141	69161	31551	60234	65128	40552	45780	40782	38607	45235	14700	77043	111300
MEDP1534	Carnitine C22:6	FA	CAR	472.342	471.335	[M+H]+	C29H45NO4	21232	6625.2	10612	13006	11931	14642	10798	7548	16411	15525	12066	13503	18685	4621.1	5402.7	5488.6	6629.7	6992.3	5846.4	14024	9727.4	16129	12806	3326.7	9565.9	13901	7327.9	9739.6	6661	8310.5	8774.7	4326.7	10193	6486.4	5992	13370	5889.7	11382	12566	3385.8	11960	15882
MEDP1643	7α,25-Dihydroxycholesterol	Hormones and hormone related compunds	Hormones and hormone related compunds	401.343	418.345	[M+H]+	C27H46O3	48452	63972	36603	44193	32209	35408	27060	42950	52599	40607	54839	30471	45808	57701	28678	31415	40801	61797	30906	28853	31474	16763	37538	29783	16843	29576	44224	80162	32988	28060	57657	3179.8	50104	33518	43985	65378	32820	40971	34974	15104	67947	47932
MEDP1644	Aniline	Alcohol and amines	Amines	94.065	93.0578	[M+H]+	C6H7N	458840	577640	491140	573330	421140	447530	536750	312620	596270	540230	437420	573850	320910	379600	425670	364880	377690	456560	606030	359060	312260	264070	331780	200380	383020	551390	459560	411540	535440	377700	423740	173340	639610	435570	476390	401400	415580	306680	170380	189710	353620	276350
MEDP1645	Benzamide	Alcohol and amines	Amines	122.06	121.053	[M+H]+	C7H7NO	79927	109200	106460	72510	44016	84511	47140	165160	85658	75315	102420	54746	54653	59010	98210	56285	32013	58943	81805	38962	66343	7381	71847	35433	36247	75445	54877	85458	84200	23059	37946	21863	59030	41889	51054	48823	111560	53537	47802	8146.7	49502	85660
MEDP1654	1-Methyladenosine	Nucleotide And Its metabolomics	Nucleotide and Its metabolomics	282.119	281.112	[M+H]+	C11H15N5O4	444790	419700	627510	360320	207560	570620	334130	406570	399440	793020	509560	306460	284960	249990	306640	430480	196490	372910	791600	441160	324230	168040	475030	286040	421710	676740	825020	590260	717440	348020	859880	364360	864420	479120	294840	1006000	789080	276470	285860	222570	410050	566060
MEDP1655	21-Deoxycortisol	Hormones and hormone related compunds	Hormones and hormone related compunds	347.222	346.214	[M+H]+	C21H30O4	64746	135320	115130	56920	77313	85160	25090	40062	55487	60272	30145	38342	166850	214530	49694	51568	45055	64505	23461	16989	30351	118990	42246	56348	23004	48891	24532	25218	32778	68270	40692	36878	70042	64110	207610	118630	119190	185120	132540	146840	70744	54313
MEDP1657	PC(O-16:0/0:0)	GP	PC-O	482.36	481.353	[M+H]+	C24H52NO6P	77106000	73557000	56097000	86603000	51645000	51626000	43675000	56908000	75895000	67273000	46102000	43973000	56932000	62844000	52555000	46307000	56273000	45459000	105940000	59973000	33469000	33592000	52905000	38907000	32149000	57618000	37983000	56024000	64376000	36111000	42905000	25338000	50087000	37134000	54741000	62695000	47674000	44687000	48166000	38129000	73540000	64083000
MEDP1658	LPC(O-18:1/0:0)	GP	LPC	508.376	507.369	[M+H]+	C26H54NO6P	59894000	48848000	45875000	68137000	44280000	39936000	46497000	44381000	83159000	52184000	38148000	40377000	49831000	45405000	41420000	40392000	47083000	37591000	102340000	31919000	24411000	31760000	31396000	29191000	31036000	53091000	28069000	42673000	48819000	30930000	35381000	18026000	38076000	31442000	54300000	52747000	56047000	50571000	39436000	31387000	81676000	48603000
MEDP1659	LPC(O-0:0/18:0)	GP	LPC	510.4	509.385	[M+H]+	C26H56NO6P	23311000	17275000	14187000	20848000	11034000	10273000	13492000	10171000	16774000	13706000	7747400	8737100	14032000	14038000	12164000	9988800	12899000	8377400	21407000	12234000	7502800	6973200	14533000	8392900	7431300	14106000	7436400	12112000	13763000	7087000	6862200	4669900	8951500	7728600	11330000	14515000	10426000	11083000	7920800	6855600	15469000	15126000
MEDP1662	NE,NE,NE-TRIMETHYLLYSINE	Amino acid and Its metabolomics	Amino acid derivatives	189.159	188.153	[M+H]+	C9H20N2O2	1204700	2411000	898970	971030	1133500	963580	1012700	962880	914400	1305600	808480	1399400	772790	929030	671110	588170	1010000	911580	716920	879190	845160	783930	1090400	635620	900980	887980	778250	1087500	902030	967340	778550	724290	738770	913590	803810	925510	1158200	603530	917750	734300	1249400	956180
MEDP1663	N,N-Dimethylarginine	Amino acid and Its metabolomics	Amino acid derivatives	203.15	202.143	[M+H]+	C8H18N4O2	389550	637070	764880	597470	581880	462070	371680	350510	514090	413910	359760	620170	597280	391340	344230	405240	566930	392100	490790	360580	468200	350140	574050	431660	387820	442330	485400	403020	616040	365830	618770	260960	780690	375700	564220	703570	560050	501880	423800	361840	561780	605680
MEDP1665	Carnitine C3:0	FA	CAR	218.14	217.131	[M+H]+	C10H19NO4	3907800	5242200	3036100	3636000	4541600	8222000	3986900	4357000	3823600	10224000	4555400	5008700	3118000	3327200	2928800	2706000	1890700	3089800	3613500	3242800	5450200	3643300	3523800	1224200	4571600	2392200	4802200	6447800	5100200	5084100	3198200	2138900	2827900	5255700	2701400	3560700	5391800	2351900	3087100	2645500	2894000	6313500
MEDP1667	Phe-Glu	Amino acid and Its metabolomics	Small Peptide	295.127	294.122	[M+H]+	C14H18N2O5	2646200	2294000	3199700	3260800	4570800	2419500	2246100	2110200	3649200	3160800	2878300	3183600	3009100	2283100	2246400	1874200	2439400	1942200	1175600	2045300	2677100	1895200	4005000	1360100	2416400	1455200	2447100	3851800	3389600	1661200	1352200	1022600	2259200	437170	3409500	2671000	1249800	2783700	1265700	973100	1926700	1965900
MEDP1679	Glu Val Phe	Amino acid and Its metabolomics	Small Peptide	394.197	393.19	[M+H]+	C19H27N3O6	60064	31861	176840	76751	69568	66323	59161	36605	96079	93494	42246	46806	24375	92992	18947	62401	34807	37906	19433	72831	45746	7652	88108	19877	34099	40716	60164	85725	141980	49245	49023	33454	36220	35127	86431	61817	104830	58062	47631	16743	41323	85652
MEDP1681	Leu-Gly-Leu	Amino acid and Its metabolomics	Small Peptide	302.207	301.2	[M+H]+	C14H27N3O4	25430	29813	30606	30677	37200	23951	33410	33576	31488	30586	24710	19737	22574	15205	14324	17640	22945	25564	17389	29520	30333	20743	28204	6789.3	19056	23445	17473	33027	30529	23194	24427	20058	24799	28548	20087	14601	19221	18831	13956	16241	16382	17428
MEDP1686	LPE(15:0/0:0)	GP	LPC	440.277	439.27	[M+H]+	C20H42NO7P	40281	18138	15191	28875	24765	26766	12024	30590	216640	38799	18875	60411	16192	30060	64897	23303	24111	6300.4	58826	29083	31447	28967	31097	7702.5	25211	30745	7815.1	25332	53321	12071	35556	8694.4	12641	12070	50496	34377	26226	39751	55214	26693	49403	77005
MEDP1689	LPC(22:2/0:0)	GP	LPC	576.403	575.395	[M+H]+	C30H58NO7P	219030	347100	154480	326270	159730	209850	132100	154750	205760	129610	173340	134650	164580	102020	177620	170990	143990	100510	303490	54878	78651	113340	73732	103000	95226	107130	88895	122430	119140	93538	132010	67536	143080	90090	208490	191000	362030	258680	94229	136040	178460	202480
MEDP1690	LPC(20:0/0:0)	GP	LPC	552.403	551.395	[M+H]+	C28H58NO7P	2941100	2299400	2351800	2806300	1976400	1593900	1465000	1222900	1995600	1000000	965820	741300	1748700	1540000	671280	1273800	924650	590670	2043200	435270	713700	868040	815910	489830	587410	1274400	689680	851470	800020	598900	493140	379640	893250	621370	1065300	1818000	2126000	2497100	546490	1161200	1208000	1135100
MEDP1691	LPC(0:0/17:0)	GP	LPC	510.353	509.348	[M+H]+	C25H52NO7P	118770000	79646000	72070000	85547000	77246000	89089000	66128000	67933000	143010000	94763000	71434000	101830000	86237000	86969000	96732000	71054000	71596000	59232000	140550000	59256000	65470000	61339000	85469000	32478000	69157000	100390000	53824000	66647000	70104000	56155000	51789000	31002000	40674000	31678000	87032000	87630000	90355000	100210000	56060000	52034000	106570000	119260000
MEDP1692	LPC(0:0/15:0)	GP	LPC	482.322	481.317	[M+H]+	C23H48NO7P	13533000	12285000	11002000	10767000	12672000	17146000	10042000	12070000	36966000	15264000	12293000	19927000	12258000	12637000	17878000	16038000	10802000	6812600	27087000	16026000	11021000	7830900	13554000	4874000	8409700	14845000	9795900	11636000	16700000	7283100	12483000	4454600	6306100	5629900	16975000	13272000	13729000	16450000	7504000	8687600	19885000	22443000
MEDP1693	LPC(12:0/0:0)	GP	LPC	440.278	439.27	[M+H]+	C20H42NO7P	105870	498780	74604	74898	115210	109760	117090	426570	150400	124660	96503	148190	66244	82516	89031	176960	205780	57316	603250	127000	130420	99110	101850	62926	106840	127650	136850	240100	115140	48120	181110	27909	40814	73116	107750	73627	67336	72972	142650	138760	136680	246260
MEDP1695	LPC(O-16:1/0:0)	GP	LPC-O	480.344	479.338	[M+H]+	C24H50NO6P	22136000	22973000	13952000	19184000	15034000	15874000	10922000	15589000	23076000	18201000	16139000	16970000	18404000	16740000	15590000	13981000	15416000	11741000	36142000	13836000	12983000	11216000	16471000	11335000	9151200	19584000	10935000	13053000	17565000	9879800	12027000	7803800	12631000	6132700	16457000	20226000	16608000	13948000	14093000	14042000	21777000	19106000
MEDP1696	LPC(18:4/0:0)	GP	LPC	516.309	515.301	[M+H]+	C26H46NO7P	27387	25390	17434	19395	20265	21748	10856	17458	40908	19801	18497	42458	23329	18706	18562	21012	9662.8	10227	48305	11945	14930	16169	10423	6527.7	8548.3	22366	7486	6432.5	23549	8289.1	18195	2941.6	12313	1440.1	23500	21606	26476	25133	8694.5	11967	28297	33429
MEDP1697	LPC(14:1/0:0)	GP	LPC	466.293	465.286	[M+H]+	C22H44NO7P	57502	45983	35081	37159	66414	56578	25679	55168	46752	57593	54425	110270	59673	34785	55562	64226	35547	12117	109980	60300	83588	66695	41888	18779	67781	55221	20873	124430	70812	19505	116150	27121	43193	31744	92428	68923	52298	34402	36594	44588	53608	90253
MEDP1700	LPC(0:0/18:0)	GP	LPC	524.363	523.364	[M+H]+	C26H54NO7P	575400000	556220000	526730000	549860000	505830000	499910000	495270000	484600000	528670000	499040000	492970000	493450000	497580000	487720000	482120000	502820000	461050000	465050000	559610000	432790000	465210000	497000000	469640000	390360000	495740000	513920000	449160000	498730000	453500000	396250000	425290000	396860000	446000000	398050000	491220000	477220000	493020000	503060000	436290000	459810000	496470000	518250000
MEDP1701	LPC(0:0/18:1)	GP	LPC	522.347	521.348	[M+H]+	C26H52NO7P	287950000	255930000	210650000	274770000	279380000	247700000	215350000	244440000	315610000	275760000	247270000	295110000	264270000	230500000	215860000	209470000	240700000	213490000	313900000	189750000	252970000	318150000	196810000	148930000	245070000	268130000	180860000	241080000	231080000	190810000	212310000	132870000	217600000	162770000	255270000	260890000	320550000	291850000	262450000	205050000	301050000	271170000
MEDP1702	LPC(0:0/20:1)	GP	LPC	550.37	549.379	[M+H]+	C28H56NO7P	5567400	5275800	5367600	8000500	5244600	4735400	4082200	4133600	9012100	7114300	3513900	4809500	5333800	5678200	3818200	3889000	4640800	3533600	7190600	2652000	2400000	3944400	2187400	2685200	2882600	3935600	2519900	3579800	3286800	3639900	3435200	2131400	3146300	3063300	4327600	5716400	7030000	5890800	3948000	3387000	6103300	3779400
MEDP1703	Methyldopa	Amino acid and Its metabolomics	Amino acid derivatives	212.1	211.21	[M+H]+	C10H13NO4	318520	343690	166370	135320	259170	276590	275880	202150	231240	221630	241540	265970	152290	218740	371540	203870	257740	197320	145500	267610	112320	133400	157060	173810	156120	182280	112630	150270	236150	193170	192340	258400	130930	198990	274880	187720	165150	226330	151470	190940	192860	161070
MEDP1704	(±) Anabasine	Heterocyclic compounds	Heterocyclic compounds	163.125	162.116	[M+H]+	C10H14N2	80796	74387	67190	65515	65401	47397	28846	57180	24776	15302	13127	73212	70710	35031	44899	57729	57730	35619	54966	52287	60479	49567	57770	40729	49417	33993	14756	77500	43775	80232	54280	43362	92040	78200	43412	29323	70023	64688	41492	50280	61702	53430
MEDP1712	1-Methylguanosine	Nucleotide And Its metabolomics	Nucleotide and Its metabolomics	298.114	297.107	[M+H]+	C11H15N5O5	133370	347670	181100	111510	77382	125500	59678	126190	176940	107580	49644	153060	90779	120050	146190	93357	205240	120080	106120	117400	110260	82024	131260	97593	73405	129070	102180	73331	251400	153290	158500	57939	226650	138760	69816	115510	93466	73734	69635	41828	69175	180670
MEDP1713	1-Methylinosine	Nucleotide And Its metabolomics	Nucleotide and Its metabolomics	283.104	282.096	[M+H]+	C11H14N4O5	311450	264240	225290	232260	272990	328890	380020	167950	330030	234150	284100	349680	173370	182300	187630	213870	250230	261210	180920	167430	193540	187250	194420	155040	210640	270700	186660	350970	418120	259490	220370	98233	237940	173440	304350	307480	277540	183190	203430	153450	220850	259290
MEDP1717	2'-O-methylcytidine	Nucleotide And Its metabolomics	Nucleotide and Its metabolomics	258.11	257.101	[M+H]+	C10H15N3O5	159760	163490	114470	110360	138330	113710	333280	123550	94333	232330	214520	209660	61476	146240	168300	99773	112040	100300	146830	63335	31583	88272	94120	86013	85360	242530	86711	135210	142000	78047	165670	95449	152300	105120	179670	175860	93292	196960	163380	57846	182680	93563
MEDP1720	2-Phenylglycine	Amino acid and Its metabolomics	Amino acid derivatives	152.065	151.063	[M+H]+	C8H9NO2	73031	91017	27556	53160	70932	42518	40033	33484	110340	62985	42623	91568	19672	78818	120610	110990	31299	47444	89411	60866	13862	66356	76571	53301	65107	50067	34639	26893	15326	28600	64373	42483	23287	98021	69367	39493	38926	73075	48336	41560	105720	64861
MEDP1740	Acrylamide	Alcohol and amines	Amines	72.043	71.0371	[M+H]+	C3H5NO	107340	167330	128100	80759	236290	118250	138730	114440	155900	116490	148680	244750	76154	94896	111330	121330	97225	114380	184250	90963	69848	101450	96278	64086	89297	206180	129080	218390	162650	122570	78459	62646	135850	130520	169010	151680	106320	128270	96601	61547	151790	134210
MEDP1750	L-Allothreonine	Amino acid and Its metabolomics	Amino acid derivatives	120.065	119.058	[M+H]+	C4H9NO3	372490	550060	346310	401430	644850	295740	354730	294720	459560	439600	432540	738070	448760	376950	373130	387700	398970	339330	390790	262980	291660	425000	424160	335250	288280	440430	296680	486200	588120	485560	349900	266750	632180	322140	405310	541840	445890	378310	376920	423680	612940	449970
MEDP1751	Deoxycholic acid	Bile acids	Bile acids	375.289	392.293	[M-H2O+H]+	C24H40O4	46823	83006	34668	145200	240870	249600	56895	92187	9	62033	128260	214450	45355	44027	9	78116	64981	38133	9	13011	108810	30002	67168	9	9	9	46684	11161	44402	136170	9	25153	84248	36194	9422.5	18487	94755	61803	9	19181	48252	83397
MEDP1753	D-Glucosaminic acid	Carboxylic acids and derivatives	Sugar acids	196.082	195.074	[M+H]+	C6H13NO6	131450	150810	121680	101190	134920	151750	128610	122330	110320	124710	102770	52212	106680	81953	116500	88066	105710	86608	103100	74768	44435	98097	107640	45276	123540	74245	49340	85595	95697	94007	67026	71490	112450	42010	53282	61912	86464	69756	72826	92747	103420	107060
MEDP1776	Leu-Ala	Amino acid and Its metabolomics	Small Peptide	203.14	202.132	[M+H]+	C10H20N2O4	139820	89808	172100	53013	97368	145700	118160	34291	79846	94200	98065	98536	83385	81437	90581	78849	80846	90284	25620	75192	63101	17997	96342	87622	137960	143500	140220	79319	187950	94556	114520	136440	53817	92015	82374	214320	139770	42747	91881	140810	44983	118220
MEDP1777	L-Methionine sulfoxide	Amino acid and Its metabolomics	Amino acid derivatives	166.053	165.046	[M+H]+	C5H11NO3S	1843000	2398100	1658800	1524100	2293100	1745400	1859300	1295000	1983600	1952700	2062900	2305900	1679500	1830100	1585700	1815400	2086000	1569500	1835700	1295900	1291700	1537300	2065300	1213900	1420600	1672100	1763700	1989400	2434600	1873400	1955400	1112500	2281400	1914200	1800100	2120600	1839100	1625200	1564300	1499000	2236100	2521000
MEDP1778	L-Norvaline	Amino acid and Its metabolomics	Amino acids	118.087	117.079	[M+H]+	C5H11NO2	24699000	33669000	23142000	21669000	35476000	23129000	28927000	23982000	27808000	31826000	27531000	32464000	21376000	21255000	23422000	23439000	23062000	24237000	28928000	19855000	20317000	21984000	29020000	15355000	20666000	29234000	25077000	38596000	27605000	25925000	22213000	17385000	24860000	23734000	29337000	27717000	22691000	24215000	18072000	16388000	27079000	29130000
MEDP1779	LPC(13:0/0:0)	GP	LPC	454.293	453.286	[M+H]+	C21H44NO7P	15545	17844	21563	15862	15174	20344	21103	29978	38458	35679	16845	33441	16908	21381	26397	30486	12993	3435.5	81955	27169	28033	13150	25445	5821.9	16699	33380	15287	23991	33984	15372	31684	10433	8178.9	9377.3	22746	10880	21631	23032	8401.8	14974	28308	49186
MEDP1780	Leu-Phe	Amino acid and Its metabolomics	Small Peptide	279.171	278.163	[M+H]+	C15H22N2O3	3029300	2290200	21421000	4247200	11011000	3869800	1737100	7734700	5851600	4340300	3159000	9211100	5419900	4022100	4248600	4175100	3237400	1228500	2663200	3672300	6635600	1677500	8998900	5655200	3219900	1804500	5435900	5012200	6426800	2824100	1050700	2132700	2252400	517250	4577600	5689700	5057800	4002600	3477200	1129400	5199200	2046500
MEDP1787	N4-Acetylcytidine	Nucleotide And Its metabolomics	Nucleotide and Its metabolomics	286.103	285.096	[M+H]+	C11H15N3O6	104970	127500	91421	127600	105860	127500	239780	74673	125120	79564	136790	183520	58225	108770	74660	89802	127150	95460	83932	71065	78284	41734	83516	65304	116610	105640	100440	129580	131710	106890	100760	40356	128000	85971	106340	104940	107980	90445	51488	67468	102000	137340
MEDP1799	Quinoline-2-carboxylic acid	Heterocyclic compounds	Pteridines and derivatives	174.056	173.048	[M+H]+	C10H7NO2	65776	188460	48823	59070	54838	112440	131020	132590	149100	294750	45882	245350	104370	50881	109700	113080	64598	71321	156740	31506	51178	26325	87232	47586	74474	87469	44949	91166	105220	115970	81416	45091	8702.1	53940	112090	36614	42389	276770	67880	22312	172660	319080
MEDP1802	Stachydrine	Organic acid And Its derivatives	Organic acid And Its derivatives	144.106	143.095	[M+H]+	C7H13NO2	21109000	813970	4038600	15360000	3852100	30335000	20402000	3791300	17374000	17034000	34387000	1166400	11713000	25734000	2150000	7293700	1435800	3064000	24864000	8565200	5193100	15070000	1472600	1481000	8875500	1205700	3487900	1028200	17490000	2260900	4567900	6097600	1535800	4506200	8474300	4174100	1840900	1215600	2119300	11983000	1778900	14850000
MEDP1844	alpha-D-Glucopyranoside, beta-D-fructofuranosyl	Carboxylic acids and derivatives	Sugars	343.123	342.116	[M+H]+	C12H22O11	16354	64796	100740	39015	38945	40554	13737	59483	40208	32744	19757	42562	58062	18394	32902	25895	25274	19081	54189	22020	63670	88940	103470	97239	119600	43066	70668	14474	27593	40949	66743	54762	37153	35441	23165	93329	62876	29985	56775	54996	68125	45721
MEDP1860	Glu-Leu	Amino acid and Its metabolomics	Small Peptide	261.143	260.137	[M+H]+	C11H20N2O5	4479800	3782500	2374300	2365300	4668900	2626900	3938100	2542300	3457100	4919100	3522500	4534000	1904900	2878000	2272500	2836000	2227300	3255300	2819700	2670900	1977700	3682800	3054100	1309900	4397000	8913900	2773800	5766700	5119400	3427300	3546800	1788100	2605400	3699100	3000900	3792300	3084800	2333000	2004600	1461600	3461200	4677200
MEDP1863	Gly-His	Amino acid and Its metabolomics	Small Peptide	195.084	212.091	[M+H-H2O]+	C8H12N4O3	1156200	1232800	1118800	1081800	1010300	1008000	1192400	920690	1101400	1018800	1073700	982060	1083300	1432000	1307000	926450	1184500	1305500	1049500	1020900	1038600	925790	1044900	809280	981390	1342800	1041500	1235900	1042800	932340	988410	1114000	971650	946050	1372900	996480	860030	1347300	783720	963210	853730	849510
MEDP1866	Gly-Phe-Phe	Amino acid and Its metabolomics	Small Peptide	370.173	260.159	[M+H]+	C20H23N3O4	17197	21582	139570	42039	57488	31051	31571	28036	65751	42327	36694	40250	20340	38224	35260	29214	24679	30415	27445	26366	41413	23522	75714	50093	26248	21109	34743	21388	59572	32096	25434	30333	90886	26414	44025	37693	67225	67196	72246	50005	92863	43520
MEDP1870	Ile-Lys	Amino acid and Its metabolomics	Small Peptide	260.195	259.19	[M+H]+	C12H25N3O3	81057	63208	49937	67138	62444	82600	81416	63435	80855	45664	75840	88841	62231	68226	66488	73528	70874	66663	32844	42931	43205	54649	59984	48847	55098	46083	69061	66410	87243	55477	76303	68976	60235	52760	48999	71599	47620	55424	49971	76393	58070	42718
MEDP1871	Ile-Met	Amino acid and Its metabolomics	Small Peptide	263.149	262.135	[M+H]+	C11H22N2O3S1	79512	57361	36482	28006	86481	32953	67167	32922	55012	77802	55656	61336	42538	45902	41073	42461	39649	51313	46812	37359	33518	40703	36436	29062	77763	134050	44390	86170	67302	55144	52903	21270	34703	59353	41812	84828	61756	46359	29686	26899	59889	78899
MEDP1875	LPE(17:1/0:0)	GP	LPE	466.285	465.286	[M+H]+	C22H44NO7P	242080	159920	83389	120570	187520	136100	78182	76365	415310	160600	157790	508180	78078	104600	153940	95440	93801	80542	186210	70817	314530	282760	173280	34456	209780	117430	52884	225900	168670	66251	104290	30108	52079	71864	177990	133990	131740	141010	355160	106290	148800	357230
MEDP1885	Pro-Ile	Amino acid and Its metabolomics	Small Peptide	211.14	228.147	[M+H-H2O]+	C11H20N2O3	44283	19266	47711	35494	50982	63867	29840	18259	51064	34174	39384	34303	45541	29315	25531	18150	42855	32602	34990	22467	16727	43855	30396	25381	30932	38372	96908	54183	26703	30228	26576	19573	15222	31425	28565	37532	26808	19449	25887	14942	20800	29209
MEDP1889	Ser-Phe	Amino acid and Its metabolomics	Small Peptide	253.118	522.357	[M+H]+	C12H16N2O4	23525	39061	167460	62493	54290	44150	29553	31737	57098	46829	47511	68206	61560	24261	36974	18336	22252	22049	25127	34337	22031	14224	50045	32734	30379	21508	41793	21995	35051	36357	19328	15269	51904	19667	44541	77718	43707	34884	66866	15101	47206	29878
MEDP1894	Tyr-Leu	Amino acid and Its metabolomics	Small Peptide	295.161	294.158	[M+H]+	C15H22N2O4	48139	64379	190840	87049	139240	85360	43530	61218	87276	94521	67527	80083	133040	85433	48474	56781	69823	27499	34048	61923	36491	34569	65279	56359	47636	54785	67462	86597	59247	39254	10294	40427	55275	14991	54849	123490	47283	53022	49135	28352	58694	42404
MEDP1898	3-Hydroxyphenylurea	Benzene and substituted derivatives	Benzene and substituted derivatives	153.065	152.059	[M+H]+	C7H8N2O2	13814000	14288000	15529000	16048000	11741000	13021000	12042000	13295000	14694000	13415000	15137000	13643000	11262000	11445000	12854000	12030000	13709000	15914000	13899000	11551000	13849000	12673000	12366000	12057000	15003000	15539000	14949000	13628000	12736000	12201000	11400000	13632000	14931000	14520000	14602000	13204000	14025000	14009000	11517000	12141000	12088000	12713000
MEDP1900	Caffeine	Heterocyclic compounds	Heterocyclic compounds	195.088	194.08	[M+H]+	C8H10N4O2	60310	62728000	422810	12466000	22713000	19389	28214000	725820	69465000	33111	13124000	178140000	27947000	172290	21734000	2612400	45799	24060000	277150	273570	36458000	21088000	7145100	82153	21254000	72933000	2810000	9951700	17998000	18022000	17653	45395	55937	7666000	21292	8933400	10699000	26268	2418500	330150	12299000	1232700
MEDP1901	Carnitine C9:1-OH	FA	CAR	310.201	309.194	[M+H]+	C17H27NO4	15268000	8948800	11061000	15083000	14842000	9972500	7649300	9665700	12091000	7278000	16922000	20433000	6777300	5592300	4973500	13500000	4482800	11433000	8463300	3055000	3658200	7568400	12685000	5901500	7997200	9901100	8393000	11010000	8305900	8187900	7104100	5850700	8103500	3719400	11882000	12966000	8720200	7585800	3971300	2263100	11840000	5695700
MEDP1902	LPC(16:2/0:0)	GP	LPC	492	491.301	[M+H]+	C24H46NO7P	192020	226070	69171	194070	95090	141210	94965	192560	117320	182620	156900	122910	143830	142460	120430	68483	145650	82396	299370	59193	29694	88010	84898	44031	108710	163250	111190	101650	121240	52466	62332	87654	99815	26028	105710	88524	113120	177700	69952	54565	198710	136260
MEDP1904	LPE(18:2/0:0)	GP	LPE	478.325	477.286	[M+H]+	C23H44NO7P	64898000	94985000	36833000	80724000	92735000	68135000	49369000	37196000	61615000	63695000	75499000	93207000	43657000	43426000	36097000	51624000	85555000	56050000	63216000	28684000	102100000	71546000	58266000	28046000	72724000	39388000	50275000	62602000	47885000	35684000	54280000	34979000	50709000	29889000	74505000	85678000	80814000	95753000	90217000	58209000	52835000	95358000
MEDP1913	N(Alpha)-Acetyl-Epsilon-(2-Propenal)Lysine	Amino acid and Its metabolomics	Small Peptide	243.13	242.127	[M+H]+	C11H18N2O4	459540	493840	580180	510830	484930	409550	602750	534430	725340	368680	781160	356820	493570	453330	467050	607880	724910	670610	361880	416140	271670	434930	381860	308760	573970	869120	392450	952200	944550	529270	574380	219340	1031300	347460	875630	828350	315140	444840	239730	309710	592470	541380
MEDP1914	N-(1-Deoxy-1-fructosyl)phenylalanine	Amino acid and Its metabolomics	Amino acid derivatives	358	327.131	[M+H]+	C15H21NO7	54125	53810	53684	84130	32704	41354	47030	48384	61715	51591	68038	57475	55721	43922	58051	47880	70017	50148	57450	49375	55159	48159	38381	51157	55456	53401	62201	44861	41290	48401	42716	37783	65319	44252	41542	50347	47624	57527	40750	47760	53644	57776
MEDP1915	N-Methylisoleucine	Amino acid and Its metabolomics	Amino acids	146.11	145.2	[M+H]+	C7H15NO2	115760	64625	66647	93607	125370	131720	93224	57543	112590	60254	153300	79917	42977	24025	59687	41289	57895	60482	80169	65859	58681	60657	36892	47555	94910	102760	41921	85986	69333	115530	90454	34806	62960	96803	82356	96969	146570	78890	54202	68346	48156	90882
MEDP1916	N-Acetyl-L-phenylalanine	Amino acid and Its metabolomics	Amino acid derivatives	208.095	207.1	[M+H]+	C11H13NO3	86969	68841	80570	57399	57020	68855	98888	80579	99214	83706	73348	77306	68370	72924	88084	85080	53219	58317	82002	59241	56911	78165	89107	104080	62329	102610	51760	67726	81977	54914	82735	88116	65495	85725	71589	82971	109120	88830	96305	89025	83091	74697
MEDP1917	Carnitine C18:1:2DC	FA	CAR	456	455.6	[M+H]+	C25H45NO6	122110	114080	117800	56552	83363	40025	107150	77714	153900	71782	209130	84854	62645	56656	60850	42005	75396	169020	50840	85736	80587	146810	81057	37414	99850	123590	83087	143130	86075	79325	123200	44868	248770	137980	50799	143070	128680	108970	87664	13409	175270	142050
MEDP1919	Cyclo(Pro-Leu)	Amino acid and Its metabolomics	Small Peptide	211	210.27	[M+H]+	C11H18N2O2	292010	82009	119850	99979	141050	159380	121130	49224	226530	117170	111180	147340	160850	91310	104220	61047	118640	134100	117470	68653	36209	271170	58399	154370	202570	142640	140110	182200	87205	58447	34841	50793	64209	71341	112110	77569	61376	126450	140940	44966	99729	114520
MEDP1921	Thr-Gln	Amino acid and Its metabolomics	Small Peptide	248	247.25	[M+H]+	C9H17N3O5	4416.9	112230	20743	41774	145050	61404	22413	117120	59587	131130	22613	198880	48251	50751	26622	33249	37444	45558	48498	48988	90966	27154	51705	49609	9200.8	58602	50758	39222	61572	126700	40044	12583	118850	44223	33307	63821	42223	43894	19703	15256	36365	135740
MEDP1923	Cyclo(Phe-Glu)	Amino acid and Its metabolomics	Small Peptide	277.119	276.112	[M+H]+	C14H16N2O4	546070	637390	1244200	702800	690550	699960	1095500	674820	912010	709080	959430	533960	510560	739260	614360	681600	1003800	696110	826880	783360	754550	295690	899010	508550	535820	495140	546110	1147600	930480	620500	596290	473640	532760	449500	1491900	977500	372510	917670	409050	592140	502130	720570
MEDP1926	Cyclo(Pro-Phe)	Amino acid and Its metabolomics	Small Peptide	245.12	245.128	[M+H]+	C14H16N2O2	41623	35551	32628	25149	37177	31236	43594	18621	41301	25373	33795	113480	25100	32881	23557	32392	35904	22442	31470	11252	26816	66908	23713	33623	64018	49110	28914	37544	26099	20086	10177	31022	25202	21568	55129	12484	26272	23285	21354	14774	21595	45169
MEDP1927	Cyclo(Pro-Pro)	Amino acid and Its metabolomics	Small Peptide	195.113	194.106	[M+H]+	C10H14N2O2	477670	549680	410420	536330	952200	748550	593740	422060	989580	837800	626120	990330	969800	634390	459830	335900	590910	600870	856300	240360	312470	427360	562170	484630	653870	799830	616880	957580	421090	578450	336330	235660	420300	444960	364260	686090	305360	679010	681000	276470	581860	906550
MEDP1928	Cyclo(Pro-Val)	Amino acid and Its metabolomics	Small Peptide	197.129	196.122	[M+H]+	C10H16N2O2	407320	189980	225030	195180	347130	258360	230300	145580	329740	269360	235010	260530	320320	185820	183860	180500	268410	250350	308040	135860	134310	333770	168090	226450	275580	264320	226220	383680	207700	134080	128420	119350	190320	151630	267660	210240	181350	251430	342130	125230	192110	288960
MEDP1933	Cyclopentylglycine	Amino acid and Its metabolomics	Amino acid derivatives	144.098	143.095	[M+H]+	C7H13NO2	1633900	260240	811300	1353500	1061000	3547600	1641600	731300	1753800	1453100	2657500	558690	1157500	2201100	407550	1010600	474460	476170	2079800	876160	476510	1275300	764160	331860	848140	464840	1015100	207270	2300300	298610	722980	911190	283650	659020	827440	2017800	390270	245180	398010	1441300	300990	1344400
MEDP1935	Ile-Asp	Amino acid and Its metabolomics	Small Peptide	247.129	246.121	[M+H]+	C10H18N2O5	58680	83295	42641	96959	83008	69679	45531	93558	81206	168060	69882	251680	139140	56574	54299	59802	52816	103290	66894	53906	18032	36027	27221	10662	26836	138650	47479	43523	30625	80010	84629	32064	72832	12810	26323	44313	65058	38812	74754	21912	80683	68590
MEDP1937	Leu-Leu	Amino acid and Its metabolomics	Small Peptide	245.18	245.186	[M+H]+	C12H24N2O3	963740	992460	920810	428580	1084700	926210	1230900	1247100	788990	1171100	875370	993330	233170	650850	1038500	1455100	330950	1645300	343260	916120	677470	255330	1521000	537400	2436100	756530	1567900	1664500	1759000	1036900	594760	959360	1122100	449690	727400	1884700	821700	376160	380720	2182400	276980	1948300
MEDP1938	N6-Acetylysine	Amino acid and Its metabolomics	Amino acid derivatives	189.123	188.116	[M+H]+	C8H16N2O3	182130	315220	250970	214970	286960	224830	194580	310350	241890	275880	204340	325770	220780	236500	200510	229980	274380	209740	215860	241780	177900	222630	229260	151200	148430	228020	226930	203670	372700	225020	189600	135320	234180	205680	235350	298400	223240	210770	159410	142070	222080	266700
MEDP1942	N-MethyTrans-4-Hydroxy-Proline	Amino acid and Its metabolomics	Amino acid derivatives	146.081	145.074	[M+H]+	C6H11NO3	524290	733040	497710	3217600	582190	260280	310130	429330	310490	1176900	231100	513790	295220	2231400	306720	162610	1383700	262620	206470	97291	510290	290720	430860	168220	162870	684110	338780	272710	207790	280430	202700	658890	33742	77489	142270	983710	188440	7863500	194350	297110	194310	248590
MEDP1954	N6-(2-Hydroxyethyl)adenosine	Nucleotide And Its metabolomics	Nucleotide and Its metabolomics	312.13	311.123	[M+H]+	C12H17N5O5	965830	1061200	864180	1091900	840900	877360	1262900	713140	1186500	942500	1150000	1265900	739210	863980	729780	701740	856250	894170	935380	540030	535830	657230	607650	415630	655860	945840	644600	977170	1159100	808160	821740	376390	753480	631150	834850	815320	927420	675230	400690	452590	894080	841570
MEDP1956	2-Aminopurine	Nucleotide And Its metabolomics	Nucleotide and Its metabolomics	136.062	135.054	[M+H]+	C5H5N5	81067	114590	71938	57700	79601	41602	75793	16803	59150	73152	31914	67241	36874	54131	70074	52376	33058	98643	74673	33630	52281	52673	59866	54307	39213	23396	18924	72999	32254	12851	55989	24446	94959	74001	87908	17803	42035	36552	43671	42584	26269	70638
MEDP1960	Isopentenyladenine-7-N-glucoside	Nucleotide And Its metabolomics	Nucleotide and Its metabolomics	366.2	365.17	[M+H]+	C16H23N5O5	18534	26374	17593	18491	29485	4219.4	27326	27814	20509	10498	24826	13980	20098	23888	28409	13854	17369	27830	19141	28617	45339	19204	25636	13001	16388	22832	44090	14311	40947	8553.7	14773	7072.7	8523.5	12675	17642	55389	10803	28366	12521	19900	12297	27455
MEDP1961	Ribosyladenosine	Nucleotide And Its metabolomics	Nucleotide and Its metabolomics	400.146	399.139	[M+H]+	C15H21N5O8	32635	8626.9	11626	20683	13089	19923	26645	11005	24864	16107	18381	16888	8872.4	12409	21145	17463	7611.8	19520	19745	12466	14933	2355.2	8903.2	6047.1	15600	17400	11521	13901	10233	12082	13501	3117.8	13041	6617.2	17335	22423	36150	15267	13692	10382	5999.8	24852
MEDP1966	S-Allyl-L-cysteine	Amino acid and Its metabolomics	Amino acid derivatives	162.058	161.051	[M+H]+	C6H11NO2S	216890	26123	296120	202130	997730	257450	248850	113770	135210	212460	102850	906930	205510	94256	171130	187450	669400	80279	99898	9	646900	69639	147270	242450	120320	298310	267780	678560	71939	415860	70278	137760	16249	9	217770	658820	9	56636	518520	9	303720	9
MEDP1974	1-Methylpiperidine-2-carboxylic acid	Amino acid and Its metabolomics	Amino acid derivatives	144.098	143.095	[M+H]+	C7H13NO2	1633900	260240	811300	1353500	1061000	3547600	1641600	731300	1753800	1453100	2657500	558690	1157500	2201100	407550	1010600	474460	476170	2079800	876160	476510	1275300	764160	331860	848140	464840	1015100	207270	2300300	298610	722980	911190	283650	659020	827440	2017800	390270	245180	398010	1441300	300990	1344400
MEDP1996	N-Formylglycine	Amino acid and Its metabolomics	Amino acids	104.034	103.027	[M+H]+	C3H5NO3	16893000	16675000	10977000	15313000	15129000	12813000	15139000	13265000	17825000	16008000	17818000	17458000	9884400	14527000	13639000	13621000	15149000	16080000	18803000	7505800	7540800	8725200	13025000	4764300	8266400	15052000	9218700	16886000	16591000	10027000	14602000	6985700	15286000	9201300	17797000	16671000	15069000	15165000	11305000	13077000	15092000	16749000
MEDP2001	D-Pyroglutamic acid	Amino acid and Its metabolomics	Amino acids	130.05	129.043	[M+H]+	C5H7NO3	9926300	13374000	22521000	22474000	9597400	15055000	12050000	5533700	27650000	10618000	17590000	3477800	5990500	6731700	10244000	12414000	16554000	13097000	19648000	11900000	7367500	5622100	4966900	3527200	5206400	12725000	8558000	10202000	16021000	10550000	5852000	7162900	9865100	13402000	14756000	16991000	11688000	11152000	8579900	8007000	7778200	10158000
MEDP2002	Aminolevulinic acid	Organic acid And Its derivatives	Organic acid And Its derivatives	132.066	131.058	[M+H]+	C5H9NO3	198220	442980	208730	282320	649200	174590	296100	237020	481820	563710	195680	675580	328780	186700	363990	199460	269940	427930	406600	370190	276430	179510	379370	316980	194540	1274400	272970	422440	289890	613410	217890	187750	289910	139370	297050	389810	1108800	804440	915300	195680	258020	278770
MEDP2003	D-Ornithine	Amino acid and Its metabolomics	Amino acids	133.097	132.09	[M+H]+	C5H12N2O2	12282000	11149000	5605800	8278400	9596100	8116000	10987000	4780000	10940000	8708000	11878000	9466600	6207900	12393000	7872400	6894300	8809900	12452000	7475800	6531600	6818600	7209800	7968700	3899800	7664300	11704000	7915700	12727000	9896900	11206000	6390800	7842600	4495400	10029000	9542400	8931400	9164400	9535800	6847000	8828500	10943000	8291700
MEDP2007	3-Methyloxindole	Heterocyclic compounds	Indole and Its derivatives	148.076	147.068	[M+H]+	C9H9NO	24715	49839	55041	56638	22657	38123	52493	51380	65401	59809	43051	34711	18722	40220	27823	41647	17655	18385	46833	28930	12603	3376.2	12611	16351	22370	43741	43248	16170	55700	15786	34681	8702.8	33683	30372	22016	29846	33819	16996	18677	17924	33200	26074
MEDP2014	3-Methyladipic acid	Organic acid And Its derivatives	Organic acid And Its derivatives	161.081	160.074	[M+H]+	C7H12O4	26068	34523	30712	25756	32720	22556	13645	39515	34889	37709	37812	26625	23425	32248	26072	14121	11316	41954	23651	27216	27514	16202	22016	20943	6311.4	27325	29457	21125	35021	31187	39874	13232	25948	14080	17905	21317	17449	16201	27658	12971	20012	27169
MEDP2015	Pimelic acid	Organic acid And Its derivatives	Organic acid And Its derivatives	161.081	160.074	[M+H]+	C7H12O4	26068	34523	30712	25756	32720	22556	13645	39515	34889	37709	37812	26625	23425	32248	26072	14121	11316	41954	23651	27216	27514	16202	22016	20943	6311.4	27325	29457	21125	35021	31187	39874	13232	25948	14080	17905	21317	17449	16201	27658	12971	20012	27169
MEDP2016	DL-2-Methylglutamic acid	Amino acid and Its metabolomics	Amino acids	162.076	161.069	[M+H]+	C6H11NO4	35188	104260	61535	40527	79980	57872	64898	71928	68383	76198	64050	102110	41031	77860	68678	45487	69249	22905	70187	50991	38220	29283	26039	22133	37480	31425	63176	89147	81626	62554	54232	9	42611	45211	62571	54947	48090	41719	9049	50240	45634	68212
MEDP2035	Cinnamoylglycine	Organic acid And Its derivatives	Organic acid And Its derivatives	206.081	205.074	[M+H]+	C11H11NO3	13502	70203	17147	39410	21282	252270	7511.3	53904	9769.6	96058	70455	85217	31132	181730	26299	39677	87823	15722	19760	29114	60184	7625.6	62158	7354.3	764.3	15897	116430	3636.4	171160	93781	9515.8	40356	25221	17803	35206	178180	92904	206840	55364	101850	4400.6	18617
MEDP2038	3-O-Methyldopa	Alcohol and amines	Polyamines	212.094	211.084	[M+H]+	C10H13NO4	105290	113330	94323	88814	91408	87273	106340	72579	56241	128530	79471	79766	56340	103760	61672	97847	79405	61324	92037	48604	72329	55129	72349	49652	45082	68935	35732	50650	88252	84148	64922	24532	79593	88855	131140	118040	135170	79212	46467	50172	61836	79383
MEDP2055	Aminopterin	Heterocyclic compounds	Pteridines and derivatives	441.164	440.156	[M+H]+	C19H20N8O5	51169	42551	31373	32442	32171	12462	33923	38853	27751	51419	17097	27257	8551.1	9	37028	20934	27159	36209	15487	20497	22223	9	20240	9083.1	22791	54006	13814	57093	36052	34640	9065.3	21724	29074	43498	15381	21133	11975	16120	24781	1587.6	22788	25087
[truncated: 47 more columns]
