# Supplementary material for: Die praemilitaerische Ausbildung des Scipio Africanus
Source: Royal Society of Chemistry journal article supplement (doi:10.1039/d3mo00130j), 2003-01-01
Supplement: d3mo00130j7.pdf [file d3mo00130j7.pdf]

Supplemental Table 3. Statistical table of differentially expressed metabolites

| <b>Group comparison</b> | <b>All diff</b> | <b>down-regulated</b> | <b>up-regulated</b> |
|-------------------------|-----------------|-----------------------|---------------------|
| B vs C                  | 236             | 108                   | 128                 |
| A vs C                  | 237             | 93                    | 144                 |
| A vs D                  | 245             | 85                    | 160                 |
| A vs B                  | 113             | 45                    | 68                  |
| B vs D                  | 210             | 83                    | 127                 |
| C vs D                  | 110             | 51                    | 59                  |
