# Supplementary material for: Metabolomic approaches to dissect dysregulated metabolism in the progression of pre-diabetes to T2DM
Source: Royal Society of Chemistry journal article supplement (doi:10.1039/d3mo00130j), 2024-04-30
Supplement: d3mo00130j8.xlsx [file d3mo00130j8.xlsx]

## Sheet: A vs B
#ID	name	Ac20	Ac24	Ac30	Ac32	Ac37	Ac4	Ac51	Ac59	Ac61	Ac69	Ac71	Ac78	Ac79	Ac86	Ac87	Ac8	Ac92	Ax55	Ax81	Ax83	BX23	Bx24	Bx25	Bx26	Bx28	Bx37	Bx40	Bx52	Bx54	Bx56	Bx57	Bx59	Bx61	Bx62	Bx68	Bx72	Bx74	Bx80	Bx81	Bx88	A_Mean	B_Mean	Fold_change	log2FC	Pvalue	VIP	regulated
meta_1	L-Cystine	5.02811e-06	6.14639e-06	9.64041e-06	7.50907e-06	5.29969e-06	3.92371e-06	7.226e-06	6.50771e-06	7.87694e-06	6.85139e-06	6.33972e-06	5.60181e-06	7.02751e-06	4.38951e-06	1.05687e-05	7.65595e-06	8.2667e-06	6.09394e-06	5.3962e-06	6.63546e-06	9.771e-06	7.44691e-06	8.99507e-06	1.16097e-05	1.03837e-05	7.90093e-06	9.18281e-06	9.11008e-06	7.71052e-06	5.21859e-06	9.38815e-06	7.82372e-06	1.21972e-05	6.17708e-06	1.05079e-05	5.22322e-06	6.89801e-06	8.58231e-06	4.8326e-06	5.77341e-06	6.69924e-06	8.23665e-06	1.22949	0.298058	0.0148041	1.51514	up
meta_9	Glutathione Oxidized	1.33451e-05	1.53096e-05	1.81143e-05	1.51751e-05	1.62152e-05	1.40129e-05	1.94159e-05	2.1462e-05	1.5679e-05	1.41741e-05	1.46813e-05	1.36841e-05	2.23845e-05	2.08917e-05	1.6457e-05	1.83449e-05	1.92245e-05	2.13391e-05	1.82003e-05	2.1678e-05	2.09479e-05	2.43057e-05	2.84794e-05	2.19408e-05	4.17115e-05	2.65171e-05	1.6891e-05	2.46016e-05	1.35812e-05	1.58352e-05	1.62503e-05	1.95923e-05	4.13595e-05	1.53015e-05	2.12684e-05	1.59681e-05	1.38826e-05	1.68266e-05	1.84889e-05	2.49511e-05	1.74894e-05	2.1935e-05	1.25419	0.326753	0.0282104	1.07676	up
meta_15	L-Saccharopine	1.15718e-05	1.27775e-05	1.10445e-05	8.08439e-06	1.91768e-05	2.30837e-05	1.34677e-05	1.05962e-05	1.20007e-05	1.21667e-05	1.3341e-05	1.39965e-05	2.27995e-05	1.08126e-05	1.49163e-05	1.80154e-05	1.47202e-05	1.64824e-05	6.9309e-06	1.66633e-05	1.19923e-05	2.23274e-05	1.37535e-05	2.08168e-05	2.19908e-05	1.43512e-05	2.04505e-05	1.5434e-05	1.25302e-05	1.6975e-05	2.1493e-05	1.6481e-05	2.11483e-05	1.36131e-05	2.08245e-05	1.36728e-05	1.4518e-05	1.67558e-05	9.70967e-06	2.23746e-05	1.41324e-05	1.70606e-05	1.2072	0.271664	0.0318376	1.22976	up
meta_28	4-Pyridoxic Acid	2.73046e-05	8.06677e-06	6.36433e-06	1.04327e-05	8.10479e-06	8.6254e-06	9.33004e-06	5.94326e-06	9.48227e-06	7.26487e-06	7.02717e-06	8.57396e-06	6.50388e-06	4.95024e-06	5.78843e-06	7.30022e-06	3.74167e-06	7.7865e-06	1.541e-05	2.19982e-05	4.41729e-06	3.49867e-06	5.31587e-06	5.13939e-06	2.19383e-06	5.43104e-06	9.8186e-06	7.35395e-06	5.25826e-06	1.22469e-05	9.62267e-06	4.50714e-06	6.07945e-06	4.73232e-06	5.57226e-06	6.8314e-06	6.54108e-06	7.05985e-06	3.45292e-06	3.4767e-06	9.49997e-06	5.92748e-06	0.623947	-0.680504	0.0170973	1.46933	down
meta_29	Taurochenodesoxycholic Acid	4.27763e-05	5.72984e-05	3.01836e-05	1.27869e-05	4.75199e-05	3.34881e-05	3.27426e-05	3.33744e-05	8.97703e-05	4.80615e-05	8.53273e-05	8.49679e-05	4.91898e-05	3.45576e-05	4.0348e-05	3.66187e-05	3.04125e-05	4.76488e-05	2.82527e-05	1.95718e-05	4.94463e-05	5.95967e-05	8.84143e-05	6.84317e-05	3.63014e-05	8.32051e-05	0.000150031	6.46988e-05	0.00014462	8.40323e-05	8.88965e-05	7.03182e-05	2.8155e-05	6.04936e-05	6.67931e-05	4.73396e-05	7.22209e-05	5.24779e-05	3.20542e-05	2.24618e-05	4.42449e-05	6.84995e-05	1.54819	0.630583	0.00963917	1.91331	up
meta_38	5-Methylcytosine	5.0323e-05	3.63809e-05	4.59677e-05	4.59888e-05	4.61611e-05	4.74487e-05	4.76066e-05	4.04377e-05	3.96493e-05	5.01821e-05	4.79675e-05	3.6442e-05	5.9481e-05	3.19952e-05	6.13406e-05	5.74933e-05	4.10063e-05	3.98128e-05	4.07148e-05	4.39255e-05	4.62558e-05	4.45128e-05	5.9314e-05	6.52367e-05	6.04068e-05	4.6762e-05	4.83659e-05	7.06321e-05	5.54569e-05	5.8358e-05	6.24349e-05	6.85467e-05	5.78929e-05	5.52269e-05	5.22601e-05	6.62056e-05	6.51877e-05	3.91267e-05	5.88356e-05	6.5368e-05	4.55162e-05	5.73193e-05	1.25932	0.33264	6.06344e-05	2.15876	up
meta_45	Β-Nicotinamide Mononucleotide	2.19443e-06	2.88807e-06	2.64882e-06	2.41484e-06	2.24306e-06	2.6668e-06	2.04348e-06	2.85812e-06	2.0936e-06	3.20594e-06	2.84519e-06	2.46667e-06	3.31595e-06	3.36959e-06	3.47842e-06	3.1346e-06	2.06436e-06	2.54036e-06	1.97329e-06	4.18919e-06	3.41542e-06	2.191e-06	2.42768e-06	3.7057e-06	3.13863e-06	1.70399e-06	3.53724e-06	4.4347e-06	3.21623e-06	3.41412e-06	2.91603e-06	3.6427e-06	1.9665e-06	3.11206e-06	3.50194e-06	2.63151e-06	3.94141e-06	3.68141e-06	4.63983e-06	2.9008e-06	2.73174e-06	3.20595e-06	1.17359	0.23093	0.0337476	1.46624	up
meta_54	D-Glucose	6.25546e-06	6.4367e-06	1.38632e-05	1.03347e-05	9.32401e-06	8.50954e-06	7.20271e-06	1.20775e-05	8.54024e-06	1.02797e-05	8.20535e-06	8.27368e-06	1.26057e-05	7.78254e-06	7.56111e-06	1.00102e-05	7.05732e-06	6.0217e-06	1.19639e-05	8.23989e-06	1.3106e-05	1.26476e-05	9.46429e-06	1.73657e-05	1.41728e-05	1.24211e-05	1.00845e-05	1.46942e-05	8.24444e-06	1.29152e-05	1.08894e-05	1.27719e-05	1.32076e-05	1.08998e-05	9.7778e-06	1.04827e-05	1.06066e-05	1.41142e-05	1.02529e-05	1.36156e-05	9.02725e-06	1.20867e-05	1.33891	0.421064	9.35437e-05	1.9263	up
meta_55	D-Mannose	6.25546e-06	6.4367e-06	1.38632e-05	1.03347e-05	9.32401e-06	8.50954e-06	7.20271e-06	1.20775e-05	8.54024e-06	1.02797e-05	8.20535e-06	8.27368e-06	1.26057e-05	7.78254e-06	7.56111e-06	1.00102e-05	7.05732e-06	6.0217e-06	1.19639e-05	8.23989e-06	1.3106e-05	1.26476e-05	9.46429e-06	1.73657e-05	1.41728e-05	1.24211e-05	1.00845e-05	1.46942e-05	8.24444e-06	1.29152e-05	1.08894e-05	1.27719e-05	1.32076e-05	1.08998e-05	9.7778e-06	1.04827e-05	1.06066e-05	1.41142e-05	1.02529e-05	1.36156e-05	9.02725e-06	1.20867e-05	1.33891	0.421064	9.35437e-05	1.9263	up
meta_56	D-Trehalose	8.11826e-05	9.43992e-05	0.000135672	9.53142e-05	0.000100352	0.000102406	0.000118915	0.000140664	9.10773e-05	0.000104722	9.8906e-05	8.47025e-05	0.00014054	0.000126242	0.000126215	0.000125423	0.000124498	0.000107081	0.000103505	0.000138349	0.000157525	0.000151927	0.000144029	0.000134466	0.000183457	0.000109503	0.000123623	0.000155308	8.75751e-05	9.0731e-05	0.000121652	0.000108196	0.00013993	0.000110107	0.000151073	0.000102195	8.79855e-05	0.000113848	0.000130287	0.000166124	0.000112008	0.000128477	1.14703	0.197905	0.0345263	1.07052	up
meta_57	Lactose	8.11826e-05	9.43992e-05	0.000135672	9.53142e-05	0.000100352	0.000102406	0.000118915	0.000140664	9.10773e-05	0.000104722	9.8906e-05	8.47025e-05	0.00014054	0.000126242	0.000126215	0.000125423	0.000124498	0.000107081	0.000103505	0.000138349	0.000157525	0.000151927	0.000144029	0.000134466	0.000183457	0.000109503	0.000123623	0.000155308	8.75751e-05	9.0731e-05	0.000121652	0.000108196	0.00013993	0.000110107	0.000151073	0.000102195	8.79855e-05	0.000113848	0.000130287	0.000166124	0.000112008	0.000128477	1.14703	0.197905	0.0345263	1.07052	up
meta_58	Lactulose	8.11826e-05	9.43992e-05	0.000135672	9.53142e-05	0.000100352	0.000102406	0.000118915	0.000140664	9.10773e-05	0.000104722	9.8906e-05	8.47025e-05	0.00014054	0.000126242	0.000126215	0.000125423	0.000124498	0.000107081	0.000103505	0.000138349	0.000157525	0.000151927	0.000144029	0.000134466	0.000183457	0.000109503	0.000123623	0.000155308	8.75751e-05	9.0731e-05	0.000121652	0.000108196	0.00013993	0.000110107	0.000151073	0.000102195	8.79855e-05	0.000113848	0.000130287	0.000166124	0.000112008	0.000128477	1.14703	0.197905	0.0345263	1.07052	up
meta_61	Maltose	8.11826e-05	9.43992e-05	0.000135672	9.53142e-05	0.000100352	0.000102406	0.000118915	0.000140664	9.10773e-05	0.000104722	9.8906e-05	8.47025e-05	0.00014054	0.000126242	0.000126215	0.000125423	0.000124498	0.000107081	0.000103505	0.000138349	0.000157525	0.000151927	0.000144029	0.000134466	0.000183457	0.000109503	0.000123623	0.000155308	8.75751e-05	9.0731e-05	0.000121652	0.000108196	0.00013993	0.000110107	0.000151073	0.000102195	8.79855e-05	0.000113848	0.000130287	0.000166124	0.000112008	0.000128477	1.14703	0.197905	0.0345263	1.07052	up
meta_98	Subericacid	1.04746e-05	9.06563e-06	8.76183e-06	9.95359e-06	1.00347e-05	7.10276e-06	1.08582e-05	8.16062e-06	1.61623e-05	8.89758e-06	1.14568e-05	1.13592e-05	7.56487e-06	7.62968e-06	8.38125e-06	1.05607e-05	1.09516e-05	1.22711e-05	8.57852e-06	1.08973e-05	1.30673e-05	9.56023e-06	1.17515e-05	1.40324e-05	1.38099e-05	1.07317e-05	1.40468e-05	1.20726e-05	8.72655e-06	1.27845e-05	9.81251e-06	1.13784e-05	1.29615e-05	1.52159e-05	1.01978e-05	9.43963e-06	1.55415e-05	8.74159e-06	9.5165e-06	1.88128e-05	9.95614e-06	1.21101e-05	1.21634	0.28255	0.00696044	1.77145	up
meta_111	FFA(16:1)	0.00655002	0.0045467	0.00737378	0.00365099	0.00369666	0.00435158	0.00439266	0.0042655	0.00671445	0.00443908	0.00690571	0.00929725	0.00493081	0.00562729	0.00560712	0.00603248	0.00322521	0.00553724	0.00485212	0.0055896	0.00774255	0.00437374	0.018423	0.00543967	0.00568694	0.0195336	0.0130481	0.00466748	0.0117917	0.00822669	0.00771263	0.0169486	0.00610417	0.0194738	0.00811826	0.0109197	0.00814796	0.00763393	0.0047561	0.00437538	0.00537931	0.0096562	1.79506	0.844034	0.00179569	2.29557	up
meta_112	FFA(16:0)	0.00113	0.0010594	0.00144351	0.00154299	0.00144758	0.00144121	0.00169514	0.00155279	0.00162592	0.00157525	0.00211329	0.00180883	0.00172929	0.00187998	0.00175847	0.0015866	0.00151511	0.00177118	0.00160754	0.00209501	0.00204816	0.00186318	0.00188047	0.00196578	0.00189109	0.00241539	0.00240808	0.00202476	0.00232014	0.00207052	0.00208547	0.00304053	0.0025744	0.00312814	0.0022945	0.00231424	0.00216837	0.00209012	0.00216457	0.00216645	0.00161895	0.00224572	1.38714	0.472116	1.73596e-07	3.15339	up
meta_113	FFA(18:2)	0.00172555	0.00155717	0.00180653	0.00203021	0.00171694	0.002072	0.00291558	0.00204784	0.00241605	0.00183453	0.00245458	0.00253495	0.00229881	0.00209922	0.00209136	0.00214116	0.00199966	0.00213497	0.00227728	0.00227196	0.00266008	0.00175477	0.00312093	0.00218981	0.00223207	0.00379172	0.00311932	0.00282544	0.00314757	0.00288861	0.00271113	0.00363625	0.00320684	0.00397897	0.00260882	0.00290505	0.00294592	0.00256772	0.0027757	0.00190125	0.00212132	0.0028484	1.34275	0.425192	2.76206e-05	2.70602	up
meta_118	FFA(10:0)	4.27446e-07	5.39493e-07	1.12242e-06	5.0964e-07	3.89232e-07	3.37717e-07	6.43688e-07	4.72555e-07	1.12072e-06	3.72626e-07	8.47193e-07	4.97866e-07	4.70999e-07	6.12287e-07	5.55162e-07	8.22516e-07	4.88591e-07	7.71137e-07	6.45399e-07	8.56722e-07	1.15489e-06	3.48578e-07	7.09677e-07	5.81727e-07	1.19874e-06	6.67545e-07	9.03333e-07	5.36693e-07	1.88038e-06	7.07724e-07	4.35228e-07	1.35599e-06	5.30136e-07	2.22731e-06	3.35271e-07	9.52467e-07	7.7387e-07	7.42378e-07	8.7837e-07	6.57976e-07	6.2517e-07	8.78915e-07	1.40588	0.491475	0.0446932	1.68279	up
meta_119	AA	0.000252237	0.000175214	0.000198349	0.00025917	0.00022708	0.000252879	0.000224612	0.000233161	0.000276757	0.000277385	0.000297665	0.000242247	0.000286569	0.000238712	0.000316545	0.000198253	0.000241288	0.000212617	0.000234975	0.000269502	0.00023097	0.000181782	0.000272417	0.000286418	0.000227969	0.000329212	0.000479375	0.000332338	0.000401918	0.000400988	0.000331617	0.000423842	0.000249372	0.000502169	0.000298854	0.000310452	0.000438447	0.000312463	0.000229705	0.000181732	0.000245761	0.000321102	1.30656	0.385777	0.00266325	2.29161	up
meta_135	8,15-Dihete	9.29e-05	6.6348e-05	0.000110954	4.51214e-05	6.43583e-05	5.7633e-05	4.66124e-05	6.14675e-05	8.45375e-05	3.53901e-05	9.17991e-05	0.000104737	5.44567e-05	6.29339e-05	7.41963e-05	8.19991e-05	2.72655e-05	5.58201e-05	7.05857e-05	5.22828e-05	6.90748e-05	5.35852e-05	0.000204199	7.99336e-05	6.14266e-05	0.000274334	0.000177242	6.00906e-05	0.000149685	8.09401e-05	6.70189e-05	0.000206713	7.61704e-05	0.000331987	9.25501e-05	0.000149566	0.000100263	8.20212e-05	7.09777e-05	4.70839e-05	6.70699e-05	0.000121743	1.81517	0.860103	0.00729466	2.02945	up
meta_137	Ribulose-5-Phosphate	1.76021e-05	1.52274e-05	2.20953e-05	1.96231e-05	1.81047e-05	2.06311e-05	1.75788e-05	2.02181e-05	1.94437e-05	1.57444e-05	1.46975e-05	2.08848e-05	2.08003e-05	2.25436e-05	1.84239e-05	1.9117e-05	2.78552e-05	1.6059e-05	2.65311e-05	2.89343e-05	2.96649e-05	1.96042e-05	1.9185e-05	2.028e-05	2.89362e-05	2.24618e-05	2.87958e-05	2.17653e-05	1.97339e-05	1.75456e-05	3.07232e-05	2.14686e-05	3.44448e-05	1.65094e-05	2.17123e-05	1.86168e-05	1.71071e-05	2.38457e-05	2.55855e-05	3.15359e-05	2.01058e-05	2.34761e-05	1.16763	0.223583	0.0311254	1.13732	up
meta_150	Tetradecanedioic acid	4.17391e-05	5.02559e-05	4.56569e-05	3.04396e-05	5.29219e-05	2.71492e-05	3.75289e-05	6.42008e-05	3.15676e-05	2.72137e-05	7.4113e-05	4.36711e-05	4.28063e-05	3.5637e-05	4.82887e-05	3.47697e-05	5.74162e-05	4.57319e-05	4.12138e-05	6.82743e-05	7.48763e-05	4.81751e-05	8.18331e-05	4.26997e-05	4.59331e-05	5.70293e-05	6.7315e-05	5.19274e-05	0.000111643	7.0364e-05	2.84942e-05	0.000121089	4.0842e-05	0.000255428	6.81128e-05	4.31783e-05	0.000116694	4.65771e-05	3.47717e-05	3.87451e-05	4.50298e-05	7.22864e-05	1.6053	0.682845	0.0305118	1.93336	up
meta_151	O-Acetyl-L-serine	9.08889e-06	7.52671e-06	7.89917e-06	7.55745e-06	5.68712e-06	4.99154e-06	9.9078e-06	7.21492e-06	7.71184e-06	1.04255e-05	5.94979e-06	7.21901e-06	6.56131e-06	5.62059e-06	8.10694e-06	7.43883e-06	7.49657e-06	1.19766e-05	7.80833e-06	8.02168e-06	9.83999e-06	1.15812e-05	9.54671e-06	1.01583e-05	1.36586e-05	8.92909e-06	9.60964e-06	1.11895e-05	9.45503e-06	8.00505e-06	1.1407e-05	8.86111e-06	8.40184e-06	6.62278e-06	1.2243e-05	1.02401e-05	7.88161e-06	8.30451e-06	7.72234e-06	8.01489e-06	7.71053e-06	9.58362e-06	1.24293	0.31374	0.00139014	1.69757	up
meta_155	D-Xylulose 5-phosphate	1.76021e-05	1.52274e-05	2.20953e-05	1.96231e-05	1.81047e-05	2.06311e-05	1.75788e-05	2.02181e-05	1.94437e-05	1.57444e-05	1.46975e-05	2.08848e-05	2.08003e-05	2.25436e-05	1.84239e-05	1.9117e-05	2.78552e-05	1.6059e-05	2.65311e-05	2.89343e-05	2.96649e-05	1.96042e-05	1.9185e-05	2.028e-05	2.89362e-05	2.24618e-05	2.87958e-05	2.17653e-05	1.97339e-05	1.75456e-05	3.07232e-05	2.14686e-05	3.44448e-05	1.65094e-05	2.17123e-05	1.86168e-05	1.71071e-05	2.38457e-05	2.55855e-05	3.15359e-05	2.01058e-05	2.34761e-05	1.16763	0.223583	0.0311254	1.13732	up
meta_161	Maltitol	1.04414e-06	1.21605e-06	2.87426e-06	1.95269e-06	1.77764e-06	1.49173e-06	1.4238e-06	2.4235e-06	6.72742e-07	2.39437e-06	9.57417e-07	1.24297e-06	2.86949e-06	4.14956e-07	1.434e-06	1.66643e-06	6.57322e-07	1.61925e-06	1.60565e-06	1.44561e-06	2.93398e-06	2.87477e-06	1.97022e-06	3.46642e-06	3.29684e-06	1.87263e-06	1.2849e-06	2.5178e-06	2.134e-06	1.28143e-06	2.1529e-06	2.17923e-06	1.77427e-06	2.04369e-06	1.68174e-06	2.15025e-06	3.04137e-06	2.37985e-06	1.30722e-06	2.01388e-06	1.5592e-06	2.21787e-06	1.42244	0.508367	0.00326182	1.66266	up
meta_191	FFA(14:0)	1.04577e-06	8.85996e-07	1.1687e-06	7.31405e-07	7.60212e-07	1.16152e-06	1.14945e-06	8.69125e-07	1.21108e-06	7.8985e-07	1.408e-06	1.65918e-06	9.24696e-07	8.92273e-07	1.02346e-06	1.0155e-06	6.40204e-07	1.05184e-06	1.3033e-06	1.20288e-06	1.32845e-06	1.33734e-06	3.01002e-06	1.18917e-06	1.33002e-06	2.57915e-06	1.9219e-06	9.71904e-07	1.92701e-06	1.22052e-06	9.45377e-07	2.36597e-06	7.42175e-07	2.28394e-06	1.38621e-06	9.90491e-07	1.23648e-06	1.07858e-06	6.37177e-07	8.2279e-07	1.04472e-06	1.46523e-06	1.40251	0.488012	0.0134728	1.92119	up
meta_192	Myoinositol	6.25546e-06	6.4367e-06	1.38632e-05	1.03347e-05	9.32401e-06	8.50954e-06	7.20271e-06	1.20775e-05	8.54024e-06	1.02797e-05	8.20535e-06	8.27368e-06	1.26057e-05	7.78254e-06	7.56111e-06	1.00102e-05	7.05732e-06	6.0217e-06	1.19639e-05	8.23989e-06	1.3106e-05	1.26476e-05	9.46429e-06	1.73657e-05	1.41728e-05	1.24211e-05	1.00845e-05	1.46942e-05	8.24444e-06	1.29152e-05	1.08894e-05	1.27719e-05	1.32076e-05	1.08998e-05	9.7778e-06	1.04827e-05	1.06066e-05	1.41142e-05	1.02529e-05	1.36156e-05	9.02725e-06	1.20867e-05	1.33891	0.421064	9.35437e-05	1.9263	up
meta_194	FFA(9:0)	2.83889e-06	2.20834e-06	2.80229e-06	2.44479e-06	2.9832e-06	2.59667e-06	2.89622e-06	2.67933e-06	3.41355e-06	2.93263e-06	2.12139e-06	2.10182e-06	2.34689e-06	3.01043e-06	3.29726e-06	2.74462e-06	1.9526e-06	3.68547e-06	2.4909e-06	2.63362e-06	3.22405e-06	2.85506e-06	2.83674e-06	2.92274e-06	3.13394e-06	2.35129e-06	2.89058e-06	3.535e-06	3.12827e-06	2.22713e-06	2.91881e-06	2.77106e-06	4.14764e-06	3.35482e-06	3.68018e-06	2.74418e-06	3.09032e-06	2.27681e-06	3.05936e-06	3.0846e-06	2.70905e-06	3.01163e-06	1.11169	0.15276	0.0425832	1.30154	up
meta_199	N-acetylornithine	0.000201554	0.000120548	0.000239661	0.000254983	0.000248026	0.00018424	0.000135288	0.000168247	0.000119545	0.000322631	0.000131219	0.00016377	0.000202406	0.000130995	0.000246203	0.000206917	0.000230156	0.000152318	0.000176672	0.000223779	0.0002325	0.000193535	0.000180358	0.000340161	0.000294686	0.000189529	0.000227261	0.000186557	0.000195396	0.000246115	0.000225911	0.000358755	0.000258073	0.000306266	0.000200118	0.000202039	0.000329339	0.000247529	0.000191985	0.000242293	0.000192958	0.00024242	1.25634	0.329224	0.00718087	1.8361	up
meta_200	D-Glucosamine 6-Phosphate	3.20848e-06	3.03022e-06	3.5152e-06	2.37052e-06	2.26865e-06	2.87551e-06	2.51702e-06	2.48364e-06	3.3863e-06	2.1591e-06	2.61361e-06	2.48223e-06	3.58485e-06	2.97267e-06	2.79507e-06	2.74491e-06	3.27948e-06	4.14777e-06	2.55455e-06	4.20586e-06	4.48716e-06	2.65404e-06	3.58752e-06	3.99271e-06	3.38382e-06	3.6912e-06	2.64389e-06	3.83585e-06	2.60588e-06	2.6062e-06	5.1609e-06	3.42479e-06	3.97305e-06	2.34131e-06	3.82633e-06	3.18401e-06	2.99419e-06	3.31839e-06	3.26474e-06	4.07308e-06	2.95978e-06	3.45245e-06	1.16646	0.222131	0.0219062	1.23902	up
meta_209	Diphenylamine	1.60456e-05	1.84409e-05	1.84341e-05	1.90146e-05	1.98549e-05	1.98818e-05	1.9608e-05	1.81391e-05	1.79853e-05	1.81443e-05	1.85671e-05	1.5409e-05	1.82195e-05	1.93661e-05	1.77502e-05	1.84044e-05	1.7929e-05	1.89609e-05	1.76647e-05	1.9486e-05	1.53098e-05	1.7668e-05	1.61288e-05	1.52123e-05	1.65238e-05	1.85657e-05	1.62124e-05	1.37752e-05	1.51071e-05	1.54117e-05	1.37198e-05	1.46047e-05	1.65256e-05	1.44924e-05	1.39833e-05	1.48618e-05	1.38352e-05	1.48588e-05	1.4642e-05	1.6114e-05	1.83653e-05	1.53776e-05	0.837321	-0.256148	2.82769e-09	2.94891	down
meta_229	1,6-anhydro-β-D-glucose	1.24322e-06	1.11099e-06	2.91174e-06	2.16465e-06	1.63278e-06	2.10629e-06	1.6621e-06	2.74197e-06	2.48606e-06	3.78588e-06	2.24016e-06	1.74228e-06	2.82842e-06	1.41432e-06	2.27926e-06	1.41568e-06	1.48673e-06	1.15198e-06	3.00512e-06	2.09715e-06	3.69005e-06	2.45738e-06	3.29918e-06	2.89941e-06	3.46012e-06	2.50129e-06	2.2865e-06	3.3019e-06	2.02248e-06	2.38649e-06	1.90856e-06	2.67994e-06	3.11102e-06	1.28883e-06	3.30286e-06	2.96694e-06	3.88382e-06	2.50715e-06	2.63005e-06	2.35411e-06	2.07534e-06	2.7469e-06	1.32359	0.40446	0.00363807	1.66376	up
meta_230	16-Hydroxyhexadecanoic acid	0.000477342	0.000417528	0.000432597	0.000409729	0.000523564	0.000546089	0.000549097	0.000519532	0.000867881	0.000597696	0.000625069	0.000675464	0.000612815	0.000621665	0.000603008	0.000600244	0.000637778	0.000516844	0.000573006	0.000597305	0.000732479	0.000499214	0.000436056	0.000629721	0.000507452	0.000610946	0.000723759	0.00064653	0.000824004	0.00102257	0.000530934	0.000870465	0.000475708	0.000895096	0.000696068	0.000806666	0.000988598	0.00071448	0.000726531	0.000478544	0.000570213	0.000690791	1.21146	0.27675	0.0119036	1.90881	up
meta_233	N,N′-dicyclohexylcarbodiimide	0.00135012	0.00129919	0.00158435	0.00143646	0.00113462	0.0014326	0.00144888	0.00139979	0.00124994	0.00129405	0.00142854	0.00124432	0.00146843	0.00142061	0.00133416	0.00151171	0.00143815	0.00129162	0.00102454	0.00164481	0.00142732	0.00135422	0.00136707	0.00158742	0.00182941	0.0014856	0.00133983	0.00178645	0.0012824	0.00142925	0.00182035	0.00157661	0.00207919	0.00168029	0.00180227	0.00137026	0.00165285	0.00140604	0.00159156	0.00197611	0.00137185	0.00159222	1.16064	0.214925	0.000984045	1.74007	up
meta_239	2-hydroxyhexadecanoic acid	0.000477342	0.000417528	0.000432597	0.000409729	0.000523564	0.000546089	0.000549097	0.000519532	0.000867881	0.000597696	0.000625069	0.000675464	0.000612815	0.000621665	0.000603008	0.000600244	0.000637778	0.000516844	0.000573006	0.000597305	0.000732479	0.000499214	0.000436056	0.000629721	0.000507452	0.000610946	0.000723759	0.00064653	0.000824004	0.00102257	0.000530934	0.000870465	0.000475708	0.000895096	0.000696068	0.000806666	0.000988598	0.00071448	0.000726531	0.000478544	0.000570213	0.000690791	1.21146	0.27675	0.0119036	1.90881	up
meta_242	FFA(20:4)	1.24887e-05	8.57252e-06	8.90593e-06	1.14444e-05	1.10684e-05	1.3969e-05	1.07126e-05	1.1381e-05	1.45622e-05	1.52034e-05	1.40341e-05	1.23963e-05	1.40991e-05	1.10127e-05	1.3268e-05	1.05598e-05	1.18491e-05	1.15718e-05	1.27431e-05	1.37116e-05	1.07767e-05	8.9569e-06	1.29279e-05	1.49965e-05	1.24139e-05	1.73583e-05	2.61468e-05	1.6012e-05	2.15667e-05	2.23469e-05	1.77223e-05	2.12049e-05	1.28084e-05	2.50635e-05	1.55065e-05	1.56133e-05	2.09428e-05	1.7684e-05	1.13339e-05	9.09199e-06	1.21777e-05	1.65237e-05	1.35688	0.440296	0.00143837	2.34383	up
meta_251	1-pyrroline-4-hydroxy-2-carboxylate	2.91634e-05	5.26034e-05	1.62257e-05	1.86717e-05	3.32157e-05	2.57098e-05	3.95043e-05	2.3072e-05	2.72687e-05	2.19755e-05	3.76571e-05	2.10071e-05	1.77752e-05	3.28037e-05	3.70191e-05	4.60669e-05	4.22254e-05	3.39908e-05	1.88507e-05	3.97791e-05	2.45283e-05	1.57927e-05	1.49574e-05	1.77713e-05	9.2616e-06	1.70901e-05	3.07426e-05	2.06361e-05	2.35226e-05	3.34743e-05	3.73578e-05	3.67012e-05	2.21832e-05	1.63294e-05	3.69043e-05	2.9297e-05	2.00302e-05	1.79646e-05	2.33627e-05	2.57232e-05	3.07293e-05	2.36815e-05	0.770651	-0.37585	0.022092	1.16376	down
meta_253	LPE(0:0/22:4)	3.03111e-05	6.00163e-05	1.20712e-05	3.85943e-05	5.09265e-05	3.77597e-05	2.78253e-05	3.43301e-05	3.91903e-05	5.5272e-05	5.6843e-05	6.81884e-05	3.33597e-05	2.96582e-05	3.20851e-05	1.84233e-05	2.04127e-05	2.32196e-05	3.36191e-05	2.9413e-05	9.59551e-05	0.000118744	0.000101217	4.92451e-05	1.78439e-05	8.62322e-05	8.63873e-05	2.18268e-05	8.42786e-05	5.20745e-05	4.2279e-05	4.29987e-05	3.9811e-05	5.48022e-05	4.80037e-05	3.46621e-05	2.95836e-05	6.39294e-05	4.70829e-05	8.48353e-05	3.65759e-05	6.00896e-05	1.64287	0.716221	0.00273702	1.89408	up
meta_254	LPE(22:4/0:0)	3.03111e-05	6.00163e-05	1.20712e-05	3.85943e-05	5.09265e-05	3.77597e-05	2.78253e-05	3.43301e-05	3.91903e-05	5.5272e-05	5.6843e-05	6.81884e-05	3.33597e-05	2.96582e-05	3.20851e-05	1.84233e-05	2.04127e-05	2.32196e-05	3.36191e-05	2.9413e-05	9.59551e-05	0.000118744	0.000101217	4.92451e-05	1.78439e-05	8.62322e-05	8.63873e-05	2.18268e-05	8.42786e-05	5.20745e-05	4.2279e-05	4.29987e-05	3.9811e-05	5.48022e-05	4.80037e-05	3.46621e-05	2.95836e-05	6.39294e-05	4.70829e-05	8.48353e-05	3.65759e-05	6.00896e-05	1.64287	0.716221	0.00273702	1.89408	up
meta_255	LPE(0:0/22:5)	4.21034e-05	0.000114745	2.18603e-05	0.00014942	8.39479e-05	5.93969e-05	8.36842e-05	8.83681e-05	8.74386e-05	7.71153e-05	0.000114778	0.000142052	3.97271e-05	4.96836e-05	7.01835e-05	3.86868e-05	2.8064e-05	3.28191e-05	7.69264e-05	9.77203e-05	0.000118943	0.000134218	0.000184327	0.000120771	6.56444e-05	0.000220746	0.000211841	3.71156e-05	0.000167482	0.000187267	3.15988e-05	6.83264e-05	0.000101395	0.000246372	8.43548e-05	3.89114e-05	4.14908e-05	9.99268e-05	8.03054e-05	8.27087e-05	7.4936e-05	0.000116187	1.55049	0.632722	0.02109	1.65983	up
meta_256	LPE(22:5/0:0)	4.21034e-05	0.000114745	2.18603e-05	0.00014942	8.39479e-05	5.93969e-05	8.36842e-05	8.83681e-05	8.74386e-05	7.71153e-05	0.000114778	0.000142052	3.97271e-05	4.96836e-05	7.01835e-05	3.86868e-05	2.8064e-05	3.28191e-05	7.69264e-05	9.77203e-05	0.000118943	0.000134218	0.000184327	0.000120771	6.56444e-05	0.000220746	0.000211841	3.71156e-05	0.000167482	0.000187267	3.15988e-05	6.83264e-05	0.000101395	0.000246372	8.43548e-05	3.89114e-05	4.14908e-05	9.99268e-05	8.03054e-05	8.27087e-05	7.4936e-05	0.000116187	1.55049	0.632722	0.02109	1.65983	up
meta_257	LPE(0:0/22:6)	0.00112243	0.00104122	0.000970837	0.00132982	0.00127974	0.000948282	0.000737084	0.000926526	0.00129718	0.00108755	0.00122887	0.00206626	0.000874043	0.000784085	0.00127412	0.00141324	0.000814347	0.000996579	0.00149815	0.000997209	0.0024949	0.00168202	0.00174812	0.00139345	0.00100566	0.00183979	0.00124831	0.000835267	0.00166912	0.00184503	0.00094361	0.00151877	0.000772187	0.00194325	0.00102702	0.00133375	0.00174181	0.0016141	0.00105845	0.000548202	0.00113438	0.00141314	1.24574	0.317004	0.0366758	1.65436	up
meta_258	LPE(22:6/0:0)	0.00112243	0.00104122	0.000970837	0.00132982	0.00127974	0.000948282	0.000737084	0.000926526	0.00129718	0.00108755	0.00122887	0.00206626	0.000874043	0.000784085	0.00127412	0.00141324	0.000814347	0.000996579	0.00149815	0.000997209	0.0024949	0.00168202	0.00174812	0.00139345	0.00100566	0.00183979	0.00124831	0.000835267	0.00166912	0.00184503	0.00094361	0.00151877	0.000772187	0.00194325	0.00102702	0.00133375	0.00174181	0.0016141	0.00105845	0.000548202	0.00113438	0.00141314	1.24574	0.317004	0.0366758	1.65436	up
meta_263	LPE(20:4/0:0)	0.00121719	0.00101712	0.000613027	0.00102317	0.00110935	0.000960756	0.000664329	0.000881241	0.0010599	0.00114932	0.00114568	0.00142113	0.000907319	0.000885788	0.000981547	0.000930292	0.000814273	0.000706483	0.000898901	0.000930159	0.00307578	0.00168042	0.00166031	0.00123419	0.000750867	0.00150926	0.00110633	0.000865351	0.00132548	0.00141316	0.000961367	0.00104672	0.000741868	0.00108781	0.000887871	0.00101328	0.00162892	0.00145979	0.00111413	0.000834354	0.000965849	0.00126986	1.31476	0.394804	0.0221647	1.65265	up
meta_267	LPE(0:0/18:2)	0.00622398	0.00930338	0.00433935	0.00888902	0.0105469	0.00821108	0.00611342	0.00460896	0.00694739	0.00789823	0.00937704	0.011504	0.00602907	0.00493897	0.00687234	0.00567618	0.0121553	0.00768572	0.00766655	0.00429879	0.017528	0.0141014	0.00964753	0.00919936	0.00503627	0.0108423	0.0055046	0.0083642	0.00916151	0.0070738	0.00593991	0.00824186	0.00677762	0.00766991	0.00498972	0.010651	0.0120399	0.0115686	0.0149802	0.0104509	0.00746428	0.00948843	1.27118	0.346166	0.0344632	1.28118	up
meta_271	LPE(0:0/16:1)	8.56936e-05	7.72051e-05	4.05755e-05	5.14153e-05	0.00012538	7.68684e-05	2.89404e-05	5.67802e-05	4.5942e-05	7.51363e-05	0.000111742	0.000223677	4.57467e-05	6.54338e-05	9.78632e-05	5.76631e-05	4.86046e-05	3.11967e-05	0.000119876	4.29995e-05	0.000262758	0.000276201	0.000273883	9.21034e-05	4.32037e-05	0.000198505	7.90508e-05	4.49218e-05	0.0001973	0.000132311	5.41964e-05	0.000184443	4.54761e-05	0.000112232	8.84115e-05	0.00013256	0.000114989	0.000128029	6.10958e-05	0.000160899	7.54369e-05	0.000134129	1.77802	0.830273	0.0059356	1.84115	up
meta_279	2-Methyl-4-pentenoic Acid	0.000143811	0.000154974	0.000166897	0.000164775	0.000166641	0.000178003	0.000176196	0.000183023	0.000138185	0.000171811	0.000165823	0.000137347	0.000196385	0.000185014	0.000172757	0.000170677	0.000175304	0.000179379	0.000153936	0.000199465	0.000141659	0.000166666	0.000172793	0.000166138	0.000201331	0.00013956	0.000115411	0.000151733	0.000104619	0.000130798	0.000149485	0.000120989	0.000192472	0.000137908	0.0001597	0.000138908	0.00013531	0.000122802	0.000159876	0.00016576	0.00016902	0.000148696	0.879753	-0.184829	0.00486026	1.88599	down
meta_286	Tridecanedioic acid	7.93061e-05	7.82002e-05	8.92333e-05	0.000104076	9.14042e-05	9.3671e-05	9.71405e-05	0.000102974	7.14289e-05	7.87044e-05	9.61376e-05	8.99536e-05	9.71373e-05	9.84445e-05	0.000105344	0.000102924	0.000100383	0.000108764	9.81691e-05	0.000112216	0.000122908	0.000106041	0.000102319	0.000101228	0.000134678	9.74402e-05	0.000103033	0.00011586	0.000103712	9.50098e-05	0.000115448	0.000107324	0.00015065	0.000124167	0.000132072	0.000111411	0.000113524	0.000103546	0.000105992	0.000150844	9.47806e-05	0.00011486	1.21186	0.277217	6.5833e-05	2.27311	up
meta_287	12-Hydroxyoctadecanoic acid	4.18508e-06	5.73023e-06	7.87285e-06	4.79675e-06	4.86429e-06	3.55075e-06	3.8069e-06	2.72962e-06	6.58121e-06	2.80178e-06	3.87028e-06	3.9609e-06	4.96399e-06	5.06884e-06	5.75885e-06	3.39642e-06	2.57346e-06	4.73862e-06	4.41655e-06	7.24158e-06	5.74954e-06	3.07781e-06	6.92653e-06	6.87367e-06	3.77168e-06	5.90368e-06	8.24845e-06	4.86078e-06	6.96585e-06	8.0001e-06	4.34573e-06	9.86703e-06	3.95293e-06	1.09668e-05	9.30554e-06	6.11723e-06	8.44053e-06	3.39915e-06	6.12289e-06	2.81402e-06	4.64545e-06	6.2855e-06	1.35304	0.436209	0.0123365	1.95376	up
meta_288	N-Palmitoylglycine	6.17878e-06	6.22099e-06	8.27615e-06	1.13001e-05	9.11053e-06	7.24628e-06	1.0103e-05	8.9784e-06	1.23274e-05	8.24614e-06	1.1235e-05	8.61755e-06	1.00361e-05	1.08563e-05	9.87376e-06	1.06858e-05	9.69328e-06	9.86911e-06	1.07222e-05	9.40393e-06	1.93681e-05	7.22112e-06	8.71352e-06	1.23143e-05	1.05671e-05	7.429e-06	1.48093e-05	1.02888e-05	1.67663e-05	1.86222e-05	1.07735e-05	1.85762e-05	1.0816e-05	2.09354e-05	1.13766e-05	1.11395e-05	1.66474e-05	1.15347e-05	9.19126e-06	7.98938e-06	9.44903e-06	1.2754e-05	1.34977	0.432709	0.00362829	2.28704	up
meta_298	(±)8(9)-DiHET	9.16037e-07	8.58504e-07	1.20262e-06	8.27684e-07	7.36867e-07	6.74927e-07	1.1117e-06	1.44706e-06	1.03895e-06	1.12041e-06	1.04802e-06	8.87301e-07	9.92505e-07	7.79122e-07	8.94802e-07	7.61096e-07	8.68772e-07	1.02393e-06	6.81533e-07	1.22383e-06	9.47916e-07	1.02982e-06	1.62034e-06	1.28697e-06	9.67851e-07	1.03094e-06	1.87395e-06	9.92102e-07	1.56537e-06	1.61446e-06	1.73869e-06	2.66346e-06	1.03831e-06	2.23512e-06	1.40624e-06	6.65591e-07	1.92406e-06	1.19895e-06	9.51899e-07	8.79271e-07	9.54784e-07	1.38157e-06	1.44699	0.533058	0.00202605	2.25785	up
meta_299	(±)11(12)-DiHET	9.16037e-07	8.58504e-07	1.20262e-06	8.27684e-07	7.36867e-07	6.74927e-07	1.1117e-06	1.44706e-06	1.03895e-06	1.12041e-06	1.04802e-06	8.87301e-07	9.92505e-07	7.79122e-07	8.94802e-07	7.61096e-07	8.68772e-07	1.02393e-06	6.81533e-07	1.22383e-06	9.47916e-07	1.02982e-06	1.62034e-06	1.28697e-06	9.67851e-07	1.03094e-06	1.87395e-06	9.92102e-07	1.56537e-06	1.61446e-06	1.73869e-06	2.66346e-06	1.03831e-06	2.23512e-06	1.40624e-06	6.65591e-07	1.92406e-06	1.19895e-06	9.51899e-07	8.79271e-07	9.54784e-07	1.38157e-06	1.44699	0.533058	0.00202605	2.25785	up
meta_304	20-HDoHE	2.7038e-07	3.62557e-07	9.75373e-08	2.5669e-07	4.17669e-07	3.04414e-07	6.88435e-07	2.85004e-07	7.06622e-07	1.86299e-07	2.03627e-07	3.5411e-07	4.15086e-07	7.20871e-07	6.36971e-07	7.74158e-07	5.61883e-07	4.44494e-07	3.03083e-07	4.27717e-07	4.3461e-08	2.35738e-07	1.79901e-07	2.04966e-07	1.86559e-07	3.12793e-07	1.85142e-07	1.22649e-07	6.18466e-07	3.85039e-07	3.97652e-07	4.4361e-07	3.68749e-07	2.72167e-07	1.27197e-08	5.87199e-07	4.14016e-07	2.46179e-07	5.42598e-07	6.24574e-08	4.2088e-07	2.91103e-07	0.691653	-0.53188	0.0348818	1.28462	down
meta_310	Glu-Gln	3.48513e-05	4.92361e-05	5.38805e-05	3.59719e-05	6.64046e-05	5.49758e-05	2.50639e-05	5.15282e-05	2.67212e-05	5.16903e-05	3.98432e-05	5.25609e-05	3.01461e-05	3.56492e-05	5.28727e-05	3.90874e-05	2.64317e-05	5.6538e-05	2.67428e-05	6.93324e-05	0.000139691	0.00013106	1.91255e-05	7.92702e-05	0.000113731	5.1702e-05	4.42024e-05	6.3925e-05	3.98317e-05	5.41658e-05	6.6636e-05	7.17959e-05	8.0264e-05	8.67472e-05	8.07045e-05	3.35368e-05	7.37825e-05	8.49224e-05	3.36243e-05	5.18727e-05	4.39764e-05	7.00296e-05	1.59244	0.671235	0.00233894	1.95549	up
meta_312	Ethionamide	0.00134174	0.00140132	0.00157692	0.00140217	0.00139759	0.00159094	0.00178088	0.00180274	0.00149656	0.00120492	0.00132883	0.00140446	0.00156298	0.00164506	0.00182686	0.0016657	0.00144732	0.00149034	0.00124258	0.0017043	0.00205302	0.00153463	0.00161537	0.00188404	0.00202962	0.00129303	0.00138319	0.00160342	0.00141952	0.00154186	0.00166537	0.00167733	0.0022396	0.00146828	0.00180449	0.00150351	0.00157308	0.00147644	0.00141861	0.00257383	0.00151571	0.00168791	1.11361	0.155245	0.0465073	1.06134	up
meta_313	Glycerophospho-N-Arachidonoyl Ethanolamine	0.00124384	0.00101678	0.000639512	0.00104317	0.0011551	0.00098658	0.000670545	0.000931907	0.00110033	0.00121359	0.00120098	0.00145323	0.000921276	0.000887675	0.00101897	0.000990683	0.000876448	0.000731692	0.000921435	0.000889008	0.00305563	0.00174564	0.0016722	0.00121643	0.000783148	0.00151758	0.0011112	0.000916582	0.00132509	0.00137508	0.000973755	0.00105314	0.000743651	0.00114881	0.000897244	0.00105598	0.00165163	0.00150883	0.00118088	0.000904483	0.000994638	0.00129185	1.29881	0.377195	0.023364	1.62885	up
meta_314	FFA(16:2)	6.63559e-07	6.54494e-07	4.40374e-07	6.64427e-07	8.82094e-07	7.26674e-07	7.87887e-07	1.00566e-06	5.67868e-07	3.61348e-07	9.45203e-07	7.56114e-07	6.34795e-07	1.47795e-06	7.82736e-07	7.62024e-07	6.45689e-07	7.27032e-07	6.18731e-07	1.08062e-06	1.07946e-06	8.93879e-07	9.12424e-07	1.34144e-06	1.03567e-06	1.0607e-06	6.0893e-07	8.12573e-07	7.65884e-07	9.26422e-07	1.0039e-06	8.67902e-07	1.05303e-06	1.34713e-06	1.13356e-06	9.00305e-07	1.18054e-06	8.05253e-07	1.16577e-06	1.23904e-06	7.59264e-07	1.00669e-06	1.32588	0.406949	0.00102652	1.94983	up
meta_325	Cyclo(his-pro)	1.447e-05	2.86694e-05	2.04402e-05	2.4082e-05	1.93551e-05	2.43833e-05	1.01962e-05	3.97438e-05	2.70749e-05	5.07271e-05	2.87653e-05	2.23282e-05	1.32917e-05	3.02763e-05	1.19739e-05	4.02528e-05	5.7053e-05	4.14838e-05	4.82401e-05	4.04724e-05	5.71939e-05	2.20926e-05	1.57014e-05	3.89694e-05	7.87066e-05	3.88665e-05	5.54456e-05	4.05268e-05	3.59588e-05	1.7261e-05	4.62558e-05	2.99272e-05	7.34509e-05	2.75073e-05	5.25675e-05	3.84212e-05	3.5085e-05	9.79e-06	5.79307e-05	5.29721e-05	2.9664e-05	4.12315e-05	1.38995	0.475036	0.0302318	1.32471	up
meta_327	D-Tagatose	6.25546e-06	6.4367e-06	1.38632e-05	1.03347e-05	9.32401e-06	8.50954e-06	7.20271e-06	1.20775e-05	8.54024e-06	1.02797e-05	8.20535e-06	8.27368e-06	1.26057e-05	7.78254e-06	7.56111e-06	1.00102e-05	7.05732e-06	6.0217e-06	1.19639e-05	8.23989e-06	1.3106e-05	1.26476e-05	9.46429e-06	1.73657e-05	1.41728e-05	1.24211e-05	1.00845e-05	1.46942e-05	8.24444e-06	1.29152e-05	1.08894e-05	1.27719e-05	1.32076e-05	1.08998e-05	9.7778e-06	1.04827e-05	1.06066e-05	1.41142e-05	1.02529e-05	1.36156e-05	9.02725e-06	1.20867e-05	1.33891	0.421064	9.35437e-05	1.9263	up
meta_346	D-Allose	6.25546e-06	6.4367e-06	1.38632e-05	1.03347e-05	9.32401e-06	8.50954e-06	7.20271e-06	1.20775e-05	8.54024e-06	1.02797e-05	8.20535e-06	8.27368e-06	1.26057e-05	7.78254e-06	7.56111e-06	1.00102e-05	7.05732e-06	6.0217e-06	1.19639e-05	8.23989e-06	1.3106e-05	1.26476e-05	9.46429e-06	1.73657e-05	1.41728e-05	1.24211e-05	1.00845e-05	1.46942e-05	8.24444e-06	1.29152e-05	1.08894e-05	1.27719e-05	1.32076e-05	1.08998e-05	9.7778e-06	1.04827e-05	1.06066e-05	1.41142e-05	1.02529e-05	1.36156e-05	9.02725e-06	1.20867e-05	1.33891	0.421064	9.35437e-05	1.9263	up
meta_357	2-Octanamidoacetic acid	2.71307e-06	2.69049e-06	2.96929e-06	2.83389e-06	2.59403e-06	2.54572e-06	3.06901e-06	3.08646e-06	2.535e-06	2.59214e-06	2.51984e-06	2.51717e-06	2.33505e-06	3.24276e-06	2.63866e-06	2.65566e-06	2.47405e-06	2.58437e-06	2.64996e-06	2.88138e-06	5.17866e-06	2.77506e-06	2.87519e-06	3.21936e-06	4.94611e-06	2.98023e-06	3.18142e-06	2.42099e-06	5.40955e-06	3.17075e-06	2.75761e-06	4.01662e-06	3.79846e-06	4.15537e-06	3.82684e-06	3.25077e-06	3.38465e-06	3.75535e-06	2.9133e-06	3.58832e-06	2.7064e-06	3.58023e-06	1.32288	0.403678	0.000158896	2.52439	up
meta_370	5-Oxoproline	0.000915301	0.000878432	0.00172161	0.001437	0.00104815	0.00125037	0.00103835	0.00105357	0.0012457	0.000544504	0.00125261	0.000791525	0.000664081	0.00103517	0.000941682	0.00146251	0.00094952	0.000753228	0.00103335	0.000829222	0.000440008	0.000704387	0.000310226	0.000412448	0.000545637	0.000353848	0.000718833	0.000540783	0.000684474	0.00115407	0.000828854	0.00103412	0.000294524	0.00056426	0.000877541	0.000755831	0.00098054	0.000674626	0.000555763	0.00135595	0.00104229	0.000689336	0.661364	-0.596484	0.000384325	2.12608	down
meta_379	Urea	0.00300953	0.00345212	0.0019133	0.0028778	0.00323554	0.0032132	0.00283756	0.00356695	0.00326154	0.00427221	0.00297354	0.0027304	0.00278984	0.00330655	0.00262987	0.00355563	0.00270846	0.00346434	0.00274914	0.00304628	0.00198021	0.00179434	0.00195971	0.00202495	0.00166062	0.00180839	0.00305932	0.00254781	0.00339018	0.00245331	0.00291079	0.00331449	0.00331071	0.00207628	0.00196072	0.0022315	0.00286047	0.00313315	0.0027793	0.00221681	0.00307969	0.00247365	0.803215	-0.316142	0.000907661	1.73687	down
meta_383	2-Methoxybenzoic Acid	3.26447e-05	3.39813e-05	5.77976e-05	4.07167e-05	5.35892e-05	3.71444e-05	3.8871e-05	3.33994e-05	3.34463e-05	3.80248e-05	3.78422e-05	5.21201e-05	4.95653e-05	5.87942e-05	6.08324e-05	5.63438e-05	4.06151e-05	4.49669e-05	4.99214e-05	5.6931e-05	5.98284e-05	4.70809e-05	5.20399e-05	5.12521e-05	7.15981e-05	3.81825e-05	5.79728e-05	6.34007e-05	5.26798e-05	6.35141e-05	5.42685e-05	6.04554e-05	0.00010499	6.65552e-05	7.45973e-05	5.86725e-05	5.72175e-05	5.53686e-05	5.30029e-05	9.93226e-05	4.53774e-05	6.21e-05	1.36852	0.452619	0.000366585	2.09596	up
meta_395	Uracil	0.000184769	0.000177549	0.00015912	0.000174289	0.000128276	0.000156215	0.000210739	0.00015869	0.000242296	0.000168722	0.000153555	0.00015162	0.000147837	0.000189444	0.000158258	0.000182157	0.000200451	0.000150524	0.000136304	0.000172658	9.89118e-05	7.59068e-05	7.66846e-05	0.000149626	9.54129e-05	0.000116806	0.000221313	0.00015802	0.000166692	0.000168155	0.000156244	0.000113969	0.000148826	0.000168958	0.000129162	0.000173602	0.000147195	0.00013595	0.000137017	0.000146524	0.000170174	0.000139249	0.818275	-0.289342	0.00372337	1.66822	down
meta_409	Hippuric Acid	0.000220928	0.0012794	0.000284303	0.00230452	0.000378484	0.00333823	0.00102052	0.00245438	0.0012165	0.000937702	0.00117372	0.0013778	0.000963759	0.000455987	0.00350683	0.00132253	0.000852228	0.000544451	0.000327117	0.00034771	0.000156804	0.000986414	0.000143863	0.000440417	0.000115979	0.000176981	0.000572928	0.00169312	8.63394e-05	0.000894743	0.000855939	0.000350872	0.000438394	0.000232818	0.000322159	0.000307906	0.00190554	0.00138271	0.00112799	0.00087249	0.00121535	0.00065322	0.537473	-0.895736	0.0314608	1.55385	down
meta_421	Pantetheine	0.0293678	0.0321098	0.0347446	0.0352197	0.026416	0.0340229	0.0299856	0.0362239	0.0288955	0.0312743	0.0351251	0.0278633	0.0362255	0.0389485	0.0378114	0.038279	0.0391461	0.0350016	0.030433	0.0390247	0.0356399	0.0386389	0.0325756	0.0384189	0.0495942	0.034143	0.0335527	0.0423603	0.0318449	0.035567	0.040559	0.0373367	0.052454	0.0340379	0.0440956	0.0346743	0.0315656	0.0321981	0.0338876	0.0411386	0.0338059	0.0377141	1.11561	0.15783	0.0188108	1.17575	up
meta_423	D-piperidine acid	0.00030273	0.000272753	0.000582928	0.000588802	0.000158842	0.000320459	0.000409963	9.10647e-05	0.000346031	0.000234743	0.000418064	0.000362531	0.00011461	0.000207958	0.000165346	0.00051566	0.000328212	0.000322029	0.000390247	0.000263461	0.00029203	0.000187912	0.000118396	8.3458e-05	0.0001276	0.00020133	0.000283032	0.000195906	0.000234967	0.000215055	0.000300555	0.00017094	0.000254048	0.000151643	0.000332915	0.000403536	0.000295484	0.000218478	0.000261495	0.000483227	0.000319822	0.0002406	0.752295	-0.410629	0.0455485	1.31559	down
meta_424	5'-Deoxy-5'-(Methylthio) Adenosine	1.61662e-05	2.44491e-05	4.50784e-05	2.45197e-05	2.09364e-05	1.58854e-05	2.31497e-05	2.27294e-05	1.13228e-05	1.92383e-05	2.44634e-05	3.01833e-05	1.59353e-05	1.07345e-05	1.45382e-05	2.03318e-05	5.4653e-06	1.56826e-05	2.5543e-05	1.78072e-05	3.10799e-05	2.50462e-05	2.48562e-05	3.29897e-05	4.02175e-05	1.78229e-05	2.2113e-05	2.51243e-05	3.43306e-05	2.82922e-05	1.69057e-05	3.99309e-05	1.62105e-05	2.39057e-05	3.54803e-05	1.66249e-05	2.29668e-05	4.6054e-05	1.17408e-05	1.39511e-05	2.0208e-05	2.62822e-05	1.30058	0.379157	0.0390709	1.38527	up
meta_425	Sarcosine	0.000240442	0.000225072	0.00028124	0.000229625	0.000247677	0.000257874	0.000251789	0.000244482	0.000207713	0.000235323	0.000239864	0.000229628	0.000260453	0.000258992	0.000242073	0.000228411	0.000234082	0.000256874	0.000200139	0.000278812	0.000125117	0.00027281	0.000218761	0.000238059	0.000276896	0.000231974	0.000191024	0.000268615	0.000200875	0.000207355	0.000230837	0.000209501	0.00025332	0.000189561	0.000215023	0.000183027	0.00017318	0.000177234	0.000164034	0.000227287	0.000242528	0.000212725	0.877112	-0.189167	0.00525047	1.8831	down
meta_428	LPC(17:0/0:0)	0.013467	0.00952743	0.00958152	0.0102561	0.00908708	0.0107507	0.00823231	0.00874404	0.015696	0.0112679	0.00849125	0.010546	0.0110062	0.0126082	0.00910107	0.0107688	0.00909198	0.00758753	0.0151642	0.00860733	0.00701927	0.00830401	0.00744457	0.011212	0.00530697	0.00860558	0.0112766	0.00711248	0.00717077	0.00818585	0.00793782	0.00669327	0.00509227	0.00520014	0.00475086	0.0100058	0.01002	0.0101208	0.0122404	0.00729951	0.0104791	0.00804994	0.768188	-0.380469	0.00131157	2.13012	down
meta_433	LPC(15:0/0:0)	0.00503954	0.00458804	0.00505227	0.00428919	0.00467293	0.00695756	0.00449805	0.00507931	0.00807765	0.00580712	0.00502779	0.00652807	0.00535316	0.00747332	0.0066197	0.00542365	0.00477561	0.0031523	0.0100212	0.00683981	0.00310123	0.00472128	0.00347329	0.00596215	0.0029626	0.00380606	0.00550251	0.00440264	0.00431231	0.00653798	0.00365412	0.0054579	0.00274325	0.00286842	0.00317788	0.00539601	0.00510483	0.0049515	0.00592403	0.00466072	0.00576381	0.00443604	0.769635	-0.377753	0.00445561	1.78841	down
meta_438	L-Norleucine	0.00254421	0.0032668	0.00280824	0.00225424	0.00306119	0.00231246	0.00271484	0.00214767	0.00241678	0.00280016	0.00274737	0.00256878	0.00228741	0.00230962	0.00224689	0.00225697	0.00271537	0.00221253	0.00224363	0.0022472	0.00105188	0.00165695	0.0015837	0.00237891	0.00175501	0.00183879	0.0019595	0.00213768	0.00232985	0.00247407	0.00239658	0.0019333	0.00185931	0.00140936	0.00190967	0.00222283	0.00180265	0.00171282	0.00157063	0.00135023	0.00250812	0.00186669	0.744258	-0.426126	1.14435e-06	2.58859	down
meta_439	DL-Carnitine	0.00139431	0.00193016	0.0028356	0.00214446	0.00211267	0.00155467	0.00131757	0.00165424	0.00191639	0.00171109	0.00156527	0.00182895	0.00214229	0.00166165	0.0017075	0.000958013	0.00141716	0.00169757	0.00156368	0.00217606	0.00192225	0.00240201	0.002193	0.00309858	0.00284582	0.00198964	0.00190081	0.00260261	0.00198556	0.00218836	0.002093	0.00166923	0.00167134	0.00216138	0.00227367	0.00170419	0.00196976	0.00180105	0.00205704	0.00169698	0.00176446	0.00211131	1.19657	0.258911	0.00824999	1.42345	up
meta_441	Indole-3-acetamide	1.39278e-05	3.17616e-05	2.88676e-05	2.14487e-05	1.34077e-05	1.02814e-05	1.65249e-05	2.46496e-05	2.25991e-05	2.67214e-05	3.94973e-05	2.00206e-05	3.17025e-05	2.01959e-05	3.5597e-05	2.6587e-05	1.22925e-05	2.25108e-05	3.63213e-05	3.73823e-05	2.12377e-05	1.84013e-05	2.13907e-05	3.44858e-05	3.38757e-05	2.34254e-05	3.73258e-05	2.71837e-05	4.23951e-05	5.10062e-05	3.5281e-05	3.00771e-05	2.64991e-05	0.000113641	6.13227e-05	4.99071e-05	3.51323e-05	2.72124e-05	2.58626e-05	1.24447e-05	2.46148e-05	3.64054e-05	1.479	0.564623	0.0336682	1.66692	up
meta_452	LPE(16:1/0:0)	4.70969e-06	4.73815e-06	2.0577e-06	3.23763e-06	6.5165e-06	4.56621e-06	1.52599e-06	2.59111e-06	3.43124e-06	4.20502e-06	4.4872e-06	1.07692e-05	2.75214e-06	2.83641e-06	5.0651e-06	2.54231e-06	3.31992e-06	1.74264e-06	5.52337e-06	2.45749e-06	8.95785e-06	1.16298e-05	1.29502e-05	4.41027e-06	1.49793e-06	8.82039e-06	4.3322e-06	2.43047e-06	8.09535e-06	5.90262e-06	2.0007e-06	7.32736e-06	1.53941e-06	5.14543e-06	4.81557e-06	6.52442e-06	5.50273e-06	5.07185e-06	2.98439e-06	6.27444e-06	3.95375e-06	5.81067e-06	1.46966	0.555481	0.0353282	1.45287	up
meta_470	L-Tryptophanamide	8.89413e-06	1.77549e-05	1.23947e-05	7.19993e-06	1.07049e-05	1.02717e-05	1.2272e-05	9.00899e-06	2.20916e-05	1.03947e-05	1.25514e-05	1.23016e-05	1.40397e-05	1.62283e-05	1.16451e-05	1.26037e-05	1.96716e-05	1.40694e-05	1.92741e-05	1.70512e-05	3.46029e-05	2.05897e-05	2.35259e-05	3.40222e-05	2.65873e-05	2.49168e-05	3.17422e-05	3.4982e-05	4.73393e-05	4.76404e-05	4.52592e-05	4.79159e-05	3.81053e-05	3.45718e-05	4.66139e-05	5.83665e-05	4.86281e-05	5.22983e-05	3.93808e-05	3.8453e-05	1.35212e-05	3.87771e-05	2.86788	1.51998	2.64406e-10	3.20272	up
meta_473	1-Hydroxylamino-2-phenylethane	0.0012125	0.00126171	0.00152086	0.00137331	0.00121215	0.00122456	0.00133608	0.00115189	0.00150516	0.00125208	0.00138328	0.0011574	0.00127633	0.00137768	0.00133594	0.00133908	0.00133726	0.00113181	0.00122249	0.0012816	0.000835579	0.000941603	0.00094347	0.00129822	0.00110269	0.00101243	0.00118279	0.00136468	0.00128847	0.00141426	0.0012108	0.00133347	0.00117407	0.00138339	0.00149623	0.00134692	0.00119481	0.00103018	0.00124554	0.00108972	0.00129466	0.00119447	0.922612	-0.116203	0.039024	1.18388	down
meta_484	Kojibiose	1.38288e-05	1.29412e-05	3.89664e-05	1.43972e-05	1.55666e-05	1.69776e-05	1.3173e-05	3.10881e-05	7.7506e-06	1.56742e-05	9.92641e-06	1.30001e-05	2.93043e-05	1.13319e-05	1.08377e-05	1.54451e-05	1.20848e-05	1.247e-05	2.87152e-05	2.42134e-05	4.58689e-05	3.23201e-05	4.22186e-05	4.43132e-05	5.55441e-05	4.24973e-05	1.60027e-05	2.73305e-05	8.59223e-06	1.399e-05	1.35139e-05	3.13345e-05	4.91385e-05	2.27524e-05	2.15808e-05	1.02667e-05	1.77142e-05	1.94919e-05	1.20915e-05	2.44576e-05	1.73846e-05	2.7551e-05	1.58479	0.664291	0.0107725	1.42949	up
meta_489	Lithocholic acid	1.23833e-06	6.61576e-06	2.0519e-06	1.67553e-05	4.55125e-06	8.28884e-06	3.5817e-06	4.80524e-06	1.09017e-09	4.50032e-06	2.1722e-06	1.24926e-05	1.20004e-06	1.37025e-09	3.22593e-06	2.48585e-06	5.86073e-06	1.36595e-09	1.13429e-09	1.69885e-06	8.04453e-07	5.48765e-06	2.50886e-06	2.44297e-06	2.01125e-07	1.29058e-09	2.40978e-07	2.33066e-06	1.16577e-09	2.33616e-06	2.70115e-06	6.3694e-08	6.01276e-07	1.13527e-06	4.97384e-06	1.21873e-09	1.04148e-06	3.36336e-06	1.24525e-06	1.51066e-09	4.07649e-06	1.57417e-06	0.386157	-1.37274	0.024143	1.54692	down
meta_492	LPC(O-18:0/0:0)	0.00295963	0.00225294	0.00210975	0.00282549	0.00147867	0.00144968	0.001964	0.00149545	0.00203183	0.00184896	0.00104677	0.00107876	0.00205066	0.00185196	0.0014629	0.00203739	0.00189686	0.00127145	0.00269797	0.00201941	0.00116512	0.00108736	0.000964324	0.00221634	0.00157332	0.00106563	0.00184801	0.0011744	0.00156886	0.00189233	0.00115983	0.00102843	0.000894976	0.0013202	0.00131954	0.00153425	0.00196246	0.00136685	0.00153585	0.00115072	0.00189153	0.00139144	0.735618	-0.442972	0.00149595	2.08686	down
meta_496	PC(O-16:0/O-2:0)	0.00295963	0.00225294	0.00210975	0.00282549	0.00147867	0.00144968	0.001964	0.00149545	0.00203183	0.00184896	0.00104677	0.00107876	0.00205066	0.00185196	0.0014629	0.00203739	0.00189686	0.00127145	0.00269797	0.00201941	0.00116512	0.00108736	0.000964324	0.00221634	0.00157332	0.00106563	0.00184801	0.0011744	0.00156886	0.00189233	0.00115983	0.00102843	0.000894976	0.0013202	0.00131954	0.00153425	0.00196246	0.00136685	0.00153585	0.00115072	0.00189153	0.00139144	0.735618	-0.442972	0.00149595	2.08686	down
meta_502	PC(O-16:0/O-1:0)	0.0554003	0.0652381	0.0707978	0.0679958	0.0674553	0.0690407	0.0712177	0.0709304	0.0632442	0.0671865	0.0661495	0.0614742	0.065676	0.0729915	0.0704296	0.0685641	0.0714526	0.0631553	0.0669673	0.0719222	0.0664948	0.0706967	0.0694091	0.0716892	0.082212	0.0717806	0.0667058	0.0739453	0.0651846	0.0669679	0.072377	0.0712084	0.0830295	0.0707703	0.0761169	0.0667337	0.0649335	0.0653466	0.0690751	0.0778813	0.0673644	0.0711279	1.05587	0.0784286	0.018312	1.20682	up
meta_504	2,4-diacetamino-2,4,6-triphenoxy-D-mannopyranose	5.69556e-05	4.67542e-05	4.01933e-05	7.23002e-05	8.28074e-05	4.82474e-05	3.89933e-05	4.10935e-05	4.5013e-05	4.627e-05	3.90744e-05	7.49793e-05	6.86353e-05	3.16953e-05	2.58974e-05	5.35181e-05	5.06414e-05	5.46834e-05	2.79477e-05	4.46518e-05	4.37434e-05	2.77853e-05	3.56332e-05	3.75892e-05	2.03281e-05	2.13347e-05	5.61793e-05	3.47246e-05	6.06381e-05	6.8006e-05	5.63109e-05	3.59039e-05	2.81971e-05	4.25639e-05	3.23422e-05	3.71158e-05	4.33161e-05	3.20211e-05	4.42282e-05	2.94998e-05	4.95176e-05	3.93731e-05	0.795133	-0.330733	0.0296389	1.06736	down
meta_513	LPC(20:1/0:0)	0.00185099	0.00181083	0.00214127	0.00331488	0.0017684	0.00172909	0.00163866	0.00153294	0.0032556	0.00252914	0.00124707	0.00154448	0.00208456	0.00155203	0.00151082	0.00217715	0.00181628	0.00138014	0.00342644	0.00104254	0.00140144	0.00086814	0.00150708	0.000834885	0.00112788	0.00119989	0.00151866	0.000979784	0.00121057	0.00110448	0.00131452	0.00110802	0.000895225	0.00115541	0.00117643	0.00154698	0.0020786	0.00253206	0.00224453	0.00146653	0.00196766	0.00136356	0.692982	-0.529111	0.00227981	2.0303	down
meta_514	LPC(20:2/0:0)	0.00300508	0.00323315	0.00247468	0.00412629	0.00318327	0.00455619	0.00280976	0.00339963	0.00334729	0.00286289	0.00317108	0.00302401	0.00349731	0.00269695	0.00321275	0.00289469	0.00312595	0.00275223	0.00628397	0.00190733	0.0027579	0.00173738	0.00325189	0.00162387	0.00151891	0.00246156	0.00295464	0.00262772	0.00254539	0.00192396	0.0017053	0.0023922	0.00260986	0.0026643	0.0012199	0.00304995	0.00381676	0.00515536	0.00434203	0.00264567	0.00327823	0.00265023	0.808433	-0.306799	0.0402083	1.40767	down
meta_515	LPC(0:0/20:2)	0.00300508	0.00323315	0.00247468	0.00412629	0.00318327	0.00455619	0.00280976	0.00339963	0.00334729	0.00286289	0.00317108	0.00302401	0.00349731	0.00269695	0.00321275	0.00289469	0.00312595	0.00275223	0.00628397	0.00190733	0.0027579	0.00173738	0.00325189	0.00162387	0.00151891	0.00246156	0.00295464	0.00262772	0.00254539	0.00192396	0.0017053	0.0023922	0.00260986	0.0026643	0.0012199	0.00304995	0.00381676	0.00515536	0.00434203	0.00264567	0.00327823	0.00265023	0.808433	-0.306799	0.0402083	1.40767	down
meta_522	LPC(18:0/0:0)	0.0550016	0.0522526	0.0572979	0.0549079	0.0523966	0.054177	0.056019	0.0554584	0.0500677	0.052149	0.0516249	0.0478641	0.055959	0.0566155	0.0570554	0.0548039	0.0517766	0.0526223	0.0546754	0.0530883	0.0498464	0.0514127	0.0528503	0.0557113	0.0498379	0.0538932	0.0525686	0.0540325	0.0502446	0.0478535	0.0465144	0.047781	0.0538473	0.0490326	0.0475513	0.0516309	0.0511321	0.0505193	0.0544732	0.0577492	0.0537907	0.0514241	0.956005	-0.0649105	0.0093351	1.8469	down
meta_528	Carnitine C24:2	9.61325e-07	7.60562e-07	6.35407e-07	6.89919e-07	5.83118e-07	6.56906e-07	6.65959e-07	5.36367e-07	9.64107e-07	1.02481e-06	2.82925e-07	8.05811e-07	6.96817e-07	8.94237e-07	3.6814e-07	1.16288e-06	6.34602e-07	7.92067e-07	1.74189e-06	5.93129e-07	7.23712e-07	8.80357e-07	6.53185e-07	7.32036e-07	9.16206e-07	4.6197e-07	6.05785e-07	4.97496e-07	4.25259e-07	6.1013e-07	4.32086e-07	4.46592e-07	7.56529e-08	3.10469e-07	2.89873e-07	7.53001e-07	1.10437e-06	6.94133e-07	7.36509e-07	3.64371e-07	7.72549e-07	5.8566e-07	0.758087	-0.399564	0.041986	1.46191	down
meta_582	Glu-Met	6.92367e-05	5.77522e-05	6.31496e-05	4.0634e-05	6.23294e-05	3.9875e-05	3.96251e-05	4.97433e-05	2.84679e-05	7.63099e-05	4.98604e-05	6.20273e-05	2.86393e-05	4.19158e-05	4.68783e-05	4.46402e-05	2.66243e-05	6.35408e-05	4.41113e-05	5.07097e-05	9.86014e-05	6.68489e-05	4.29128e-05	0.00010653	7.83223e-05	8.67685e-05	8.69847e-05	6.82663e-05	7.97152e-05	7.9814e-05	6.05185e-05	9.43031e-05	6.73795e-05	0.000100052	0.00011471	3.41773e-05	7.7944e-05	9.39618e-05	3.47329e-05	4.09423e-05	4.93035e-05	7.56743e-05	1.53486	0.618112	0.000164533	2.58143	up
meta_583	Met-Glu	6.92367e-05	5.77522e-05	6.31496e-05	4.0634e-05	6.23294e-05	3.9875e-05	3.96251e-05	4.97433e-05	2.84679e-05	7.63099e-05	4.98604e-05	6.20273e-05	2.86393e-05	4.19158e-05	4.68783e-05	4.46402e-05	2.66243e-05	6.35408e-05	4.41113e-05	5.07097e-05	9.86014e-05	6.68489e-05	4.29128e-05	0.00010653	7.83223e-05	8.67685e-05	8.69847e-05	6.82663e-05	7.97152e-05	7.9814e-05	6.05185e-05	9.43031e-05	6.73795e-05	0.000100052	0.00011471	3.41773e-05	7.7944e-05	9.39618e-05	3.47329e-05	4.09423e-05	4.93035e-05	7.56743e-05	1.53486	0.618112	0.000164533	2.58143	up
meta_588	Carnitine C12:3	0.000161522	8.53901e-05	0.000212863	0.000112365	0.000127184	0.000111991	0.00013775	0.000162013	0.000147112	9.86604e-05	0.000243864	0.000162202	6.61875e-05	6.42752e-05	0.000206602	7.53287e-05	6.91982e-05	0.000266663	0.000105551	4.66689e-05	6.63035e-05	4.70128e-05	8.68392e-05	0.000131898	7.47493e-05	6.50667e-05	2.92333e-05	0.00011518	0.00010537	0.000139089	6.81809e-05	0.000104021	6.1908e-05	0.000116897	5.24257e-05	9.70192e-05	0.000204358	0.000109888	6.1628e-05	5.9332e-06	0.000133169	8.715e-05	0.654429	-0.611691	0.0107882	1.26849	down
meta_593	Aniline	5.82557e-05	7.53337e-05	7.30373e-05	7.77023e-05	5.6437e-05	6.31534e-05	7.81337e-05	4.59646e-05	7.22259e-05	7.2878e-05	5.91007e-05	7.08529e-05	4.68983e-05	6.4808e-05	5.3438e-05	5.50928e-05	5.55412e-05	6.92929e-05	7.63794e-05	5.92683e-05	2.50622e-05	4.52548e-05	3.65182e-05	5.05979e-05	3.7563e-05	5.49242e-05	7.2237e-05	7.25761e-05	5.33067e-05	7.36199e-05	6.1813e-05	6.35052e-05	3.32202e-05	9.43323e-05	7.43668e-05	6.45102e-05	5.42701e-05	5.44824e-05	4.24988e-05	3.1843e-05	6.41897e-05	5.48251e-05	0.854111	-0.227505	0.0486519	1.03991	down
meta_594	Benzamide	1.01478e-05	1.42415e-05	1.58316e-05	9.82714e-06	5.89858e-06	1.19258e-05	6.86208e-06	2.42835e-05	1.03757e-05	1.01601e-05	1.38382e-05	6.75946e-06	7.98707e-06	1.49524e-05	8.24314e-06	8.56434e-06	4.70767e-06	8.94588e-06	1.03101e-05	6.43127e-06	7.03148e-06	9.61487e-06	1.02072e-06	1.0957e-05	6.64224e-06	5.19774e-06	9.88397e-06	8.66646e-06	1.10694e-05	1.1577e-05	3.77375e-06	5.6869e-06	4.18999e-06	8.70599e-06	7.1519e-06	6.91346e-06	6.60097e-06	1.46255e-05	7.419e-06	1.36743e-06	1.05147e-05	7.40478e-06	0.704234	-0.505874	0.0184636	1.52848	down
meta_597	PC(O-16:0/0:0)	0.0097896	0.00959303	0.00834218	0.0117371	0.00692094	0.00728523	0.00635769	0.0083672	0.00919313	0.00907525	0.00622893	0.00542932	0.00832013	0.00800147	0.00678183	0.00912078	0.00827523	0.00689939	0.0133519	0.00989946	0.00708503	0.00485055	0.00464544	0.00806824	0.00729347	0.00461009	0.00754847	0.00599847	0.00725678	0.00885132	0.0059098	0.0064301	0.00485597	0.00738704	0.00634006	0.00741274	0.0084765	0.00625005	0.00619259	0.0064	0.00844849	0.00659313	0.780392	-0.357729	0.000909484	1.98988	down
meta_598	LPC(O-18:1/0:0)	0.00760432	0.00637057	0.00682206	0.00923448	0.00593396	0.00563559	0.00676848	0.00652535	0.010073	0.00703972	0.00515425	0.00498532	0.00728238	0.00630617	0.00591556	0.0065898	0.00692379	0.00570525	0.0128982	0.00526872	0.00580088	0.00353781	0.00439209	0.00478802	0.00547212	0.00445049	0.0069554	0.0044328	0.00552743	0.00671233	0.00506189	0.00530249	0.00345464	0.00561561	0.00536824	0.00735302	0.00713151	0.00734774	0.00700798	0.00526834	0.00695185	0.00554904	0.798211	-0.325158	0.00843984	1.73757	down
meta_599	LPC(O-0:0/18:0)	0.00295963	0.00225294	0.00210975	0.00282549	0.00147867	0.00144968	0.001964	0.00149545	0.00203183	0.00184896	0.00104677	0.00107876	0.00205066	0.00185196	0.0014629	0.00203739	0.00189686	0.00127145	0.00269797	0.00201941	0.00116512	0.00108736	0.000964324	0.00221634	0.00157332	0.00106563	0.00184801	0.0011744	0.00156886	0.00189233	0.00115983	0.00102843	0.000894976	0.0013202	0.00131954	0.00153425	0.00196246	0.00136685	0.00153585	0.00115072	0.00189153	0.00139144	0.735618	-0.442972	0.00149595	2.08686	down
meta_608	LPC(20:0/0:0)	0.000373411	0.000299879	0.000349736	0.000380333	0.000264857	0.000224924	0.000213257	0.000179803	0.000241726	0.000134902	0.000130494	9.15279e-05	0.000255558	0.000102202	0.000186553	0.000223506	0.000135974	8.9647e-05	0.000257509	7.1848e-05	8.03865e-05	0.000103434	0.000120041	0.00012443	9.18231e-05	8.42332e-05	0.000166958	0.000108918	0.000110291	0.000109998	9.80138e-05	7.3906e-05	7.27571e-05	0.00013174	0.000106089	0.000144257	0.000245797	0.000278718	0.000346041	0.000194909	0.000210382	0.000139637	0.66373	-0.591332	0.0121426	1.91366	down
meta_609	LPC(0:0/17:0)	0.0150794	0.0103871	0.0107175	0.011594	0.0103517	0.0125718	0.00962613	0.00998821	0.0173227	0.0127837	0.00965159	0.0125729	0.0126028	0.0147274	0.0104061	0.0126221	0.0105286	0.00898975	0.0177138	0.00978111	0.0082462	0.00948835	0.00848257	0.0130344	0.00608829	0.00991695	0.013152	0.00850017	0.00863277	0.00963889	0.00919012	0.00776153	0.00594146	0.00599877	0.00540853	0.0117854	0.0118478	0.0118455	0.0138868	0.00873397	0.0120009	0.00937902	0.781525	-0.355637	0.00225682	2.03513	down
meta_610	LPC(0:0/15:0)	0.00171819	0.00160216	0.00163611	0.00145923	0.00169817	0.00241957	0.00146179	0.00177466	0.00447768	0.00205914	0.00166093	0.00246037	0.0017914	0.00272192	0.00234882	0.00183405	0.00158849	0.00103396	0.00341384	0.00264534	0.00110381	0.00159724	0.00108294	0.00206704	0.000913675	0.00120593	0.00194483	0.00154702	0.00150721	0.00229615	0.00119193	0.00187081	0.000853714	0.00093005	0.000961218	0.00229867	0.0017944	0.00179987	0.00227959	0.00145822	0.00209029	0.00153522	0.73445	-0.445263	0.0117848	1.62254	down
meta_612	LPC(O-16:1/0:0)	0.00281045	0.00299605	0.0020748	0.00259997	0.00201471	0.00224007	0.00158989	0.00229206	0.00279519	0.00245535	0.00218057	0.00209528	0.00268959	0.00237357	0.00204757	0.00242954	0.002267	0.00178195	0.00455506	0.00228384	0.00207302	0.00188158	0.00155106	0.0025119	0.00212485	0.00131226	0.00256568	0.00172691	0.00169075	0.00241508	0.00161689	0.00180247	0.00149558	0.00186287	0.00104706	0.00222852	0.0027346	0.0021773	0.00193287	0.00235697	0.00242863	0.00195541	0.805152	-0.312667	0.00809631	1.74252	down
meta_613	LPC(18:4/0:0)	3.47713e-06	3.31127e-06	2.59261e-06	2.62857e-06	2.71571e-06	3.06898e-06	1.58029e-06	2.56685e-06	4.95517e-06	2.67119e-06	2.49917e-06	5.24226e-06	3.40933e-06	2.82606e-06	3.07728e-06	2.71487e-06	1.42096e-06	1.55217e-06	6.08799e-06	1.9717e-06	1.27893e-06	2.16376e-06	2.23601e-06	1.58955e-06	1.22368e-06	1.22581e-06	2.93015e-06	1.18223e-06	8.332e-07	3.23785e-06	1.35656e-06	2.72685e-06	5.63751e-07	1.81597e-06	2.45875e-07	3.18225e-06	2.92118e-06	3.47099e-06	3.48286e-06	2.00867e-06	3.01848e-06	1.98381e-06	0.65722	-0.605551	0.00548105	1.80193	down
meta_617	LPC(0:0/20:1)	0.000706853	0.00068805	0.000798215	0.00108429	0.000702829	0.000668238	0.000594238	0.000607764	0.00109163	0.000959732	0.00047477	0.000593826	0.000779489	0.000581319	0.000569558	0.000824098	0.000682453	0.000536301	0.000906248	0.000437753	0.000580735	0.000347824	0.000545471	0.000333588	0.000503365	0.000413358	0.000515599	0.000397956	0.000463691	0.000451916	0.000595693	0.000514827	0.000408478	0.000464029	0.000523011	0.000586021	0.000772869	0.000921631	0.000816329	0.000568512	0.000714383	0.000536245	0.750641	-0.413805	0.00198655	2.02323	down
meta_618	Methyldopa	4.04402e-05	4.48228e-05	2.47409e-05	1.83397e-05	3.47314e-05	3.90311e-05	4.01593e-05	2.97222e-05	2.801e-05	2.98983e-05	3.2635e-05	3.28392e-05	2.22559e-05	5.65668e-05	2.98575e-05	3.17465e-05	3.7902e-05	2.99476e-05	1.83377e-05	4.41731e-05	2.22806e-05	1.62782e-05	1.84479e-05	2.39523e-05	3.25823e-05	2.23872e-05	2.38803e-05	1.77871e-05	1.94644e-05	3.24692e-05	3.16135e-05	2.88257e-05	4.95218e-05	1.93101e-05	3.39745e-05	3.72228e-05	2.53801e-05	2.16511e-05	3.13641e-05	3.20495e-05	3.33079e-05	2.70221e-05	0.811284	-0.30172	0.0297863	1.37729	down
meta_627	D-Glucosaminic acid	1.66893e-05	1.96681e-05	1.8095e-05	1.37141e-05	1.80806e-05	2.14143e-05	1.87215e-05	1.79862e-05	1.3363e-05	1.68236e-05	1.38855e-05	6.44658e-06	1.55904e-05	1.77371e-05	1.28976e-05	1.18941e-05	1.55452e-05	1.31447e-05	1.29939e-05	1.23416e-05	1.07124e-05	6.43982e-06	1.35658e-05	1.64156e-05	8.4874e-06	1.77153e-05	9.72676e-06	7.79203e-06	1.10871e-05	1.31578e-05	1.53848e-05	1.00451e-05	1.37009e-05	1.65846e-05	7.17256e-06	7.21517e-06	8.37063e-06	1.13354e-05	9.66658e-06	1.55677e-05	1.53516e-05	1.15072e-05	0.749574	-0.415857	0.00123693	1.97248	down
meta_635	Stachydrine	0.00268006	0.000106155	0.00060058	0.00208171	0.00051622	0.00428074	0.00296988	0.000557436	0.00210451	0.00229792	0.0046461	0.000144015	0.00171176	0.000327336	0.00106819	0.00373487	0.000211142	0.000465029	0.00313367	0.00141382	0.000311741	0.000752619	0.00208403	0.000224578	0.000277627	0.00127273	0.000157957	0.000550827	0.000133183	0.00240477	0.000370011	0.000684583	0.00116859	0.000226506	0.000769364	0.00114755	0.000564347	0.000241341	0.000168454	0.00201136	0.00175256	0.000776108	0.442844	-1.17513	0.0111694	1.64427	down
meta_636	alpha-D-Glucopyranoside, beta-D-fructofuranosyl	2.07635e-06	8.45045e-06	1.4981e-05	5.28763e-06	5.21902e-06	5.7228e-06	1.99967e-06	8.7458e-06	4.87038e-06	4.41722e-06	2.66941e-06	5.2551e-06	8.48527e-06	5.00931e-06	3.79242e-06	2.66959e-06	3.71667e-06	2.89596e-06	6.82957e-06	3.63474e-06	8.35138e-06	9.22748e-06	1.22995e-05	1.57796e-05	1.82283e-05	1.71504e-05	5.64203e-06	1.11603e-05	1.87481e-06	3.79388e-06	6.70156e-06	1.00027e-05	1.0495e-05	5.47948e-06	6.051e-06	3.13688e-06	1.26183e-05	8.24302e-06	4.15523e-06	9.23114e-06	5.33642e-06	8.9811e-06	1.68298	0.75102	0.00586216	1.39616	up
meta_645	Tyr-Leu	6.11187e-06	8.39607e-06	2.83798e-05	1.17976e-05	1.86595e-05	1.20456e-05	6.33658e-06	9.0009e-06	1.05717e-05	1.27511e-05	9.12371e-06	9.8878e-06	1.94427e-05	7.38014e-06	8.31578e-06	1.23992e-05	1.02678e-05	4.17357e-06	4.29115e-06	1.02213e-05	7.22756e-06	5.28852e-06	4.78055e-06	9.95533e-06	1.0565e-05	6.83089e-06	7.17733e-06	1.0654e-05	1.12169e-05	8.14612e-06	6.42417e-06	1.54274e-06	7.74774e-06	8.15219e-06	2.55948e-06	7.42736e-06	1.66961e-05	6.19879e-06	7.34763e-06	4.75892e-06	1.09777e-05	7.53486e-06	0.686379	-0.542922	0.0258669	1.24621	down
meta_649	LPC(16:2/0:0)	2.43794e-05	2.94832e-05	1.02864e-05	2.63019e-05	1.2743e-05	1.99269e-05	1.38239e-05	2.83122e-05	1.42109e-05	2.46358e-05	2.11991e-05	1.51756e-05	2.10195e-05	1.83354e-05	1.00296e-05	2.06757e-05	2.14186e-05	1.25054e-05	3.77303e-05	9.77071e-06	1.02897e-05	4.30345e-06	1.21709e-05	1.29473e-05	8.25401e-06	1.55888e-05	2.13872e-05	1.75597e-05	1.31667e-05	1.66698e-05	8.5864e-06	9.34159e-06	1.67987e-05	1.47211e-05	4.44388e-06	1.43147e-05	1.19686e-05	1.483e-05	2.46251e-05	9.1588e-06	1.95982e-05	1.30563e-05	0.666201	-0.585971	0.00275709	1.98118	down
meta_663	Ile-Asp	7.45018e-06	1.0863e-05	6.34114e-06	1.31407e-05	1.11239e-05	9.83278e-06	6.62786e-06	1.37559e-05	9.83645e-06	2.26716e-05	9.4419e-06	3.10748e-05	2.03341e-05	8.267e-06	8.75822e-06	8.21079e-06	7.76686e-06	1.56765e-05	8.43081e-06	8.89801e-06	1.0996e-05	2.61332e-06	4.98217e-06	4.15132e-06	1.99869e-06	3.84822e-06	1.81644e-05	7.49813e-06	5.63753e-06	4.21076e-06	1.30941e-05	1.26832e-05	6.14499e-06	1.07416e-05	2.18711e-06	3.56452e-06	5.99121e-06	8.52908e-06	5.37845e-06	3.67795e-06	1.19251e-05	6.80464e-06	0.570614	-0.809414	0.00485433	1.24228	down
meta_667	N6-(2-Hydroxyethyl)adenosine	0.000122625	0.000138398	0.000128512	0.000147983	0.000112689	0.000123809	0.000183838	0.000104853	0.00014372	0.000127145	0.000155379	0.0001563	0.000108029	0.000111109	0.000102772	0.000125393	0.000125916	0.00013571	0.000117888	8.91402e-05	5.89399e-05	7.76561e-05	9.08883e-05	9.26692e-05	7.79136e-05	9.40488e-05	0.000123914	0.000101799	0.000126573	0.000159369	0.000132261	0.000123153	7.21343e-05	0.000111126	0.000107759	0.000113051	0.000110233	0.000121584	9.35713e-05	7.59677e-05	0.00012806	0.000103231	0.806108	-0.310954	0.00173086	1.75324	down
meta_677	3-Methyloxindole	3.13789e-06	6.49982e-06	8.18514e-06	7.67604e-06	3.03626e-06	5.37974e-06	7.64131e-06	7.55442e-06	7.922e-06	8.06834e-06	5.81671e-06	4.28575e-06	2.73606e-06	4.23604e-06	6.09935e-06	5.83728e-06	2.59626e-06	2.79032e-06	5.90247e-06	4.77534e-06	2.74731e-06	1.82651e-06	4.66895e-07	1.92323e-06	3.06514e-06	3.20781e-06	5.73046e-06	6.82995e-06	2.0945e-06	7.65842e-06	2.58348e-06	5.19758e-06	1.66787e-06	4.96771e-06	5.18555e-06	2.98129e-06	4.03524e-06	4.43366e-06	2.35525e-06	3.00856e-06	5.50883e-06	3.59832e-06	0.653192	-0.614421	0.00312096	1.71218	down
meta_680	DL-2-Methylglutamic acid	4.46757e-06	1.35972e-05	9.15086e-06	5.49255e-06	1.07181e-05	8.16663e-06	9.44708e-06	1.05756e-05	8.2832e-06	1.02792e-05	8.65392e-06	1.26075e-05	5.99633e-06	1.04562e-05	6.66174e-06	1.13001e-05	1.01834e-05	3.47633e-06	8.84583e-06	8.41684e-06	1.33107e-06	5.5391e-06	4.04955e-06	3.97106e-06	4.14903e-06	5.37455e-06	4.11696e-06	9.97709e-06	1.15472e-05	1.12231e-05	1.02374e-05	8.12766e-06	1.72483e-09	6.28445e-06	7.71908e-06	8.47304e-06	7.42895e-06	6.30458e-06	5.78129e-06	8.43284e-06	8.83881e-06	6.50348e-06	0.735787	-0.44264	0.0139546	1.45351	down

## Sheet: A vs C
#ID	name	Ac20	Ac24	Ac30	Ac32	Ac37	Ac4	Ac51	Ac59	Ac61	Ac69	Ac71	Ac78	Ac79	Ac86	Ac87	Ac8	Ac92	Ax55	Ax81	Ax83	Cc106	Cc113	Cc124	Cc128	Cx121	Cx133	Cx142	Cx145	Cx146	Cx149	Cx150	Cx23	Cx25	Cx49	Cx50	Cx61	Cx63	Cx88	A_Mean	C_Mean	Fold_change	log2FC	Pvalue	VIP	regulated
meta_3	L-Aspartic Acid	0.000251666	0.000197242	0.000263127	0.000190173	0.00020935	0.000214213	0.000304296	0.00015447	0.000234931	0.000169261	0.00016435	0.000127865	0.000169144	0.000269664	0.000283417	0.000272169	0.000245994	0.000244292	0.000123228	0.000228681	0.00012406	0.000186156	0.000207374	0.000202548	8.60972e-05	0.000145626	7.15159e-05	0.000145264	0.000103012	0.000100407	0.00012463	0.000148076	9.87701e-05	9.19849e-05	6.8303e-05	0.000114686	0.000199312	0.000194513	0.000215877	0.000134019	0.620811	-0.687773	1.18464e-05	1.7168	down
meta_8	Asp-phe	5.58142e-05	3.7985e-05	9.36723e-05	4.67599e-05	8.17394e-05	5.66974e-05	3.76395e-05	8.61245e-05	7.35523e-05	9.46822e-05	4.86538e-05	6.55129e-05	0.000122823	2.88589e-05	5.13745e-05	8.49743e-05	2.89743e-05	3.15731e-05	1.556e-05	0.000149917	4.26682e-05	5.33543e-05	5.99083e-06	7.63386e-05	1.91348e-06	3.65771e-06	3.70281e-06	6.66467e-05	1.18289e-05	2.31024e-06	4.66783e-06	3.43537e-05	2.67584e-06	4.56904e-06	2.86519e-06	1.38547e-05	1.73907e-05	5.8179e-05	6.46444e-05	2.26093e-05	0.349749	-1.51561	0.000118709	1.51159	down
meta_10	Hexanoyl Glycine	1.40688e-06	9.97045e-07	1.02125e-06	1.31789e-06	6.72717e-07	2.85589e-07	2.26824e-06	5.65052e-07	9.1981e-07	1.58577e-06	1.46569e-06	1.39286e-06	2.39307e-06	2.88954e-06	7.08674e-07	1.05614e-06	1.41271e-06	1.57721e-06	1.80567e-06	1.56614e-06	1.64194e-06	2.18385e-06	1.46936e-06	2.1224e-06	3.06993e-06	5.62923e-06	2.14341e-06	4.8405e-06	1.30814e-06	1.08925e-06	2.74668e-06	7.44488e-07	1.44931e-06	2.24638e-06	2.34033e-06	1.39219e-06	1.47058e-06	4.40853e-06	1.3654e-06	2.34981e-06	1.72097	0.78322	0.0095684	1.16997	up
meta_13	L-Glutamine	0.000372001	0.000405256	0.000382883	0.000376538	0.000478134	0.00052001	0.000338824	0.000298957	0.000314186	0.000425925	0.000405552	0.000390719	0.000357608	0.000381187	0.000421289	0.000458042	0.000420445	0.000444661	0.000309762	0.000414528	0.000373295	0.000356567	0.000340183	0.00047119	0.000401064	0.000338291	0.00019449	0.000357124	0.000271771	0.000359432	0.000285747	0.000460727	0.000249705	0.000248824	0.000270779	0.000272642	0.000332509	0.000352943	0.000395825	0.000329849	0.83332	-0.263058	0.00410742	1.22841	down
meta_18	N-Acetyl-L-Tyrosine	2.35059e-06	3.60536e-06	2.26396e-06	2.7519e-06	2.8051e-06	2.99249e-06	2.68238e-06	2.06592e-06	3.24446e-06	2.39316e-06	2.53916e-06	3.08044e-06	2.65364e-06	3.83973e-06	2.55108e-06	3.61426e-06	2.01304e-06	2.45688e-06	2.38012e-06	2.80495e-06	2.86893e-06	3.0734e-06	2.37459e-06	2.98675e-06	3.88027e-06	2.67322e-06	4.53378e-06	3.16498e-06	2.93205e-06	4.13924e-06	2.20813e-06	2.84009e-06	5.82562e-06	2.34902e-06	3.59036e-06	2.64459e-06	6.80402e-06	4.51745e-06	2.75443e-06	3.52258e-06	1.27888	0.354879	0.023219	1.01425	up
meta_23	Phe-Phe	0.000156977	0.00013056	0.00043975	0.000190376	0.000329383	0.000218433	0.000196823	0.0003488	0.000266182	0.000288663	0.000243999	0.000299302	0.000239789	0.000269497	0.000261508	0.000201039	0.000181731	0.000132973	0.000300272	0.000191377	0.00026934	0.00015756	3.43403e-05	0.000289434	9.99176e-05	0.000140607	1.59421e-05	0.000158554	9.10901e-05	0.000233475	9.54413e-05	9.81386e-05	7.87988e-06	6.23565e-05	2.86297e-06	4.31346e-05	0.000124994	0.000214649	0.000244372	0.000118873	0.486444	-1.03965	4.92453e-05	1.62748	down
meta_24	S-(5-Adenosy)-L-Homocysteine	7.82358e-06	9.28825e-06	4.9272e-06	8.43175e-06	8.85176e-06	6.71089e-06	1.00078e-05	5.59935e-06	8.89091e-06	8.38334e-06	7.81812e-06	7.76857e-06	4.30679e-06	5.0154e-06	5.74333e-06	8.46739e-06	6.0122e-06	5.7218e-06	8.11018e-06	6.27231e-06	8.2794e-06	9.51917e-06	7.85856e-06	9.40302e-06	1.05008e-05	8.75434e-06	9.08485e-06	9.25658e-06	1.29753e-05	9.21932e-06	7.82375e-06	9.39883e-06	9.17272e-06	1.13255e-05	7.77816e-06	9.82473e-06	1.5524e-05	1.04006e-05	7.20755e-06	9.78332e-06	1.35737	0.440815	0.000103467	1.53279	up
meta_25	S-Sulfo-L-Cysteine	3.1177e-06	3.55502e-06	2.68094e-06	3.15496e-06	1.54272e-06	2.685e-06	4.96737e-06	1.12412e-06	2.06792e-06	5.0317e-06	3.04353e-06	2.541e-06	2.39467e-06	2.30384e-06	5.30968e-06	5.6457e-06	2.8261e-06	7.99534e-06	5.71418e-06	8.64562e-06	3.2815e-06	4.11623e-06	8.64841e-06	5.74508e-06	5.60497e-06	3.41656e-06	3.62789e-06	7.7948e-06	6.67486e-06	5.81409e-06	3.29922e-06	1.26674e-05	7.78241e-06	6.47945e-06	3.68323e-06	3.38298e-06	7.4522e-06	1.2217e-05	3.81736e-06	6.2049e-06	1.62545	0.700835	0.00665107	1.18279	up
meta_29	Taurochenodesoxycholic Acid	4.27763e-05	5.72984e-05	3.01836e-05	1.27869e-05	4.75199e-05	3.34881e-05	3.27426e-05	3.33744e-05	8.97703e-05	4.80615e-05	8.53273e-05	8.49679e-05	4.91898e-05	3.45576e-05	4.0348e-05	3.66187e-05	3.04125e-05	4.76488e-05	2.82527e-05	1.95718e-05	6.85929e-05	5.46368e-05	6.07773e-05	5.97487e-05	5.3335e-05	5.56562e-05	7.4403e-05	4.44086e-05	5.09351e-05	4.52531e-05	0.000100033	5.4771e-05	7.4517e-05	6.82432e-05	5.20981e-05	6.30161e-05	0.000129664	7.87246e-05	4.42449e-05	6.60452e-05	1.49272	0.577943	0.00291083	1.19696	up
meta_43	Hypoxanthine	0.00210962	0.00183222	0.000738746	0.00136816	0.00143954	0.00123657	0.00169994	0.000557686	0.00101594	0.000641458	0.00159013	0.000828048	0.000944322	0.00132743	0.00162197	0.00341093	0.00203318	0.00166038	0.000359406	0.000906918	0.000635069	0.00128265	0.00198742	0.00105007	0.000728494	0.000330102	0.000822659	0.000405753	0.000415923	0.000515075	0.000680879	0.000602073	0.000578187	0.000629401	0.000452509	0.000494038	0.000656201	0.000716433	0.00136613	0.000721274	0.527969	-0.921475	0.00118343	1.30628	down
meta_46	3,3',5-Triiodo-L-Thyronine	6.30676e-07	5.59864e-07	7.21213e-07	8.53651e-07	8.90711e-07	6.94556e-07	6.05665e-07	4.81186e-07	7.1997e-07	8.0388e-07	6.73682e-07	8.63397e-07	7.4142e-07	7.08097e-07	6.83001e-07	5.20943e-07	4.81664e-07	6.32357e-07	6.9798e-07	5.55114e-07	8.73033e-07	7.41091e-07	9.32243e-07	8.8904e-07	7.28801e-07	5.21321e-07	7.7309e-07	8.27976e-07	9.48313e-07	7.0669e-07	1.00089e-06	9.63726e-07	6.2891e-07	9.20403e-07	7.5876e-07	8.88201e-07	7.75008e-07	7.21923e-07	6.75951e-07	8.11079e-07	1.19991	0.262923	0.00191614	1.22806	up
meta_47	L-Thyroxine	3.9328e-05	4.82358e-05	7.17644e-05	5.19899e-05	5.00031e-05	3.7215e-05	4.1976e-05	4.81686e-05	4.34237e-05	4.6131e-05	5.21303e-05	3.7252e-05	4.36744e-05	3.98955e-05	4.40005e-05	5.21451e-05	5.0784e-05	4.93653e-05	4.46823e-05	3.47347e-05	6.17595e-05	5.2035e-05	6.3458e-05	5.46443e-05	6.04836e-05	5.20511e-05	4.61504e-05	5.25377e-05	5.30027e-05	3.76165e-05	5.24217e-05	6.44292e-05	4.65306e-05	5.57033e-05	5.44772e-05	4.73365e-05	5.05172e-05	5.52781e-05	4.6345e-05	5.33574e-05	1.15131	0.203275	0.00575328	1.17619	up
meta_49	α-Ketoglutaric Acid（α-KG）	8.55743e-06	1.40732e-05	2.37728e-06	6.274e-06	8.97786e-06	1.4477e-05	3.39552e-05	1.26545e-05	1.6579e-05	3.00184e-05	2.82438e-05	1.23642e-05	9.26493e-06	1.64201e-05	1.32315e-05	1.42579e-05	8.84419e-06	5.28682e-06	2.33929e-05	1.467e-05	1.14667e-05	4.24976e-05	0.0001312	1.22077e-05	0.000187923	2.17589e-05	0.000193172	5.82752e-05	7.97997e-05	4.94276e-05	6.75913e-05	6.0296e-05	0.000269021	9.95839e-05	0.000194945	0.000106831	9.63782e-05	2.80968e-05	1.4696e-05	9.50262e-05	6.46612	2.6929	0.000238857	1.69667	up
meta_51	Citramalic Acid	3.687e-06	1.03296e-06	8.17205e-07	2.20111e-06	6.08794e-06	3.06912e-06	4.26252e-06	2.63816e-06	2.64826e-06	2.25556e-06	7.60005e-06	4.91655e-06	2.21901e-06	2.95669e-06	2.88763e-06	1.9908e-06	5.91647e-06	5.00968e-06	3.21345e-06	2.75015e-06	4.61986e-06	2.72877e-06	1.75259e-05	3.42378e-06	8.51655e-06	5.96846e-06	1.19754e-05	3.58727e-06	7.44696e-06	3.91259e-06	5.19932e-06	1.01356e-05	8.61544e-06	9.43711e-06	7.26514e-06	5.19055e-06	1.14652e-05	8.51279e-06	3.40802e-06	7.52926e-06	2.20928	1.14358	0.000279627	1.55392	up
meta_54	D-Glucose	6.25546e-06	6.4367e-06	1.38632e-05	1.03347e-05	9.32401e-06	8.50954e-06	7.20271e-06	1.20775e-05	8.54024e-06	1.02797e-05	8.20535e-06	8.27368e-06	1.26057e-05	7.78254e-06	7.56111e-06	1.00102e-05	7.05732e-06	6.0217e-06	1.19639e-05	8.23989e-06	1.55689e-05	1.04923e-05	3.96142e-06	1.25669e-05	9.81934e-06	1.25536e-05	1.1953e-05	1.35088e-05	1.44367e-05	1.16153e-05	1.3298e-05	1.39833e-05	7.24896e-06	1.14333e-05	1.06557e-05	9.75718e-06	1.40134e-05	1.43095e-05	9.02725e-06	1.1732e-05	1.29962	0.378087	0.00278026	1.24274	up
meta_55	D-Mannose	6.25546e-06	6.4367e-06	1.38632e-05	1.03347e-05	9.32401e-06	8.50954e-06	7.20271e-06	1.20775e-05	8.54024e-06	1.02797e-05	8.20535e-06	8.27368e-06	1.26057e-05	7.78254e-06	7.56111e-06	1.00102e-05	7.05732e-06	6.0217e-06	1.19639e-05	8.23989e-06	1.55689e-05	1.04923e-05	3.96142e-06	1.25669e-05	9.81934e-06	1.25536e-05	1.1953e-05	1.35088e-05	1.44367e-05	1.16153e-05	1.3298e-05	1.39833e-05	7.24896e-06	1.14333e-05	1.06557e-05	9.75718e-06	1.40134e-05	1.43095e-05	9.02725e-06	1.1732e-05	1.29962	0.378087	0.00278026	1.24274	up
meta_62	D-Glucoronic Acid	5.16853e-06	8.52179e-06	6.44672e-06	6.26275e-06	9.09767e-06	7.47954e-06	1.59514e-06	8.90724e-06	4.25419e-06	6.6052e-06	3.44576e-06	1.03217e-05	7.34376e-06	4.95953e-06	5.37924e-06	6.73856e-06	5.59148e-06	6.22978e-06	6.58746e-06	5.15482e-06	8.69911e-06	9.4481e-06	4.98248e-06	6.93122e-06	1.04658e-05	9.95488e-06	1.29609e-05	9.92996e-06	9.35126e-06	9.90248e-06	5.16088e-06	9.24375e-06	8.91488e-06	6.76103e-06	7.52672e-06	1.38247e-05	8.58956e-06	1.95088e-05	6.30454e-06	9.56425e-06	1.51704	0.60126	0.00133483	1.39817	up
meta_63	D-Glyceric Acid	3.11719e-06	5.27403e-06	7.40768e-07	2.28975e-06	2.88992e-06	2.49774e-06	1.73459e-06	2.09401e-06	3.01213e-06	3.22901e-06	1.97182e-06	3.32182e-06	2.22208e-06	1.50132e-06	2.16385e-06	1.95974e-06	1.51658e-06	3.18463e-06	3.23979e-06	2.87577e-06	5.27569e-06	6.14177e-06	3.50892e-06	2.96379e-06	5.02151e-06	9.96656e-07	3.82817e-06	3.05514e-06	4.79707e-06	2.17773e-06	2.81965e-06	2.46289e-06	3.59233e-06	4.22706e-06	9.50986e-06	4.43956e-06	3.32748e-06	3.84468e-06	2.54183e-06	3.99944e-06	1.57345	0.653933	0.00582412	1.24978	up
meta_64	Orotic Acid	1.0811e-05	1.0535e-05	9.90928e-06	9.75626e-06	1.0242e-05	8.03582e-06	1.86895e-05	1.19364e-05	1.06909e-05	1.16407e-05	1.18686e-05	7.96205e-06	1.01165e-05	1.10009e-05	1.62256e-05	1.2288e-05	1.16725e-05	1.09783e-05	1.16976e-05	1.07088e-05	1.34286e-05	8.535e-06	2.4062e-05	1.65366e-05	1.19574e-05	7.1188e-06	1.44485e-05	1.6722e-05	1.0921e-05	1.24835e-05	1.25032e-05	1.06884e-05	1.39636e-05	1.35435e-05	2.0872e-05	1.31708e-05	1.77945e-05	1.42316e-05	1.13383e-05	1.40545e-05	1.23956	0.309829	0.0207508	1.01076	up
meta_80	4-Hydroxy-2-Oxoglutaric Acid	6.048e-06	2.0015e-05	8.06126e-06	8.70944e-06	8.66147e-06	6.30264e-06	1.11406e-05	1.41359e-05	1.49462e-05	1.35914e-05	1.10484e-05	1.08633e-05	1.12829e-05	1.11026e-05	6.44996e-06	9.51787e-06	8.52772e-06	1.25861e-05	1.02269e-05	1.65148e-05	1.33506e-05	1.57143e-05	1.0445e-05	1.99048e-05	1.83897e-05	6.0286e-06	1.61032e-05	1.17767e-05	1.92502e-05	9.50965e-06	1.04152e-05	1.41124e-05	9.83326e-06	1.84254e-05	1.92187e-05	1.8972e-05	1.70623e-05	1.42916e-05	1.09866e-05	1.46002e-05	1.32891	0.410241	0.00732206	1.13975	up
meta_86	Guanidinoethyl Sulfonate	2.1199e-05	2.1164e-05	2.22976e-05	2.16953e-05	2.2247e-05	1.94838e-05	2.42749e-05	1.93345e-05	1.77188e-05	1.92424e-05	2.17719e-05	1.81932e-05	2.51919e-05	2.16468e-05	2.56645e-05	2.43781e-05	2.49214e-05	2.73462e-05	1.82142e-05	2.34063e-05	2.25993e-05	2.22484e-05	1.69065e-05	2.04708e-05	1.75564e-05	1.86384e-05	1.68429e-05	1.7468e-05	2.17397e-05	1.72409e-05	1.83154e-05	1.95682e-05	2.21665e-05	2.11172e-05	2.0591e-05	1.62892e-05	1.99736e-05	2.43442e-05	2.19696e-05	1.96709e-05	0.89537	-0.159444	0.00899899	1.03925	down
meta_94	Methylmalonic Acid	0.000560313	0.000455596	0.000419971	0.000436428	0.000486912	0.000564504	0.000644139	0.000534558	0.00058806	0.000646544	0.000598695	0.000404202	0.000506804	0.000544733	0.000556231	0.000588996	0.00044815	0.000339696	0.000572313	0.000516968	0.000503838	0.000752137	0.000730201	0.000557202	0.00104486	0.000494384	0.000829962	0.000735131	0.00084502	0.000568353	0.000669952	0.000666491	0.00103936	0.000984853	0.00113278	0.000906234	0.000770334	0.000510517	0.000520691	0.000763422	1.46617	0.552055	8.2989e-05	1.73395	up
meta_95	Phenyllactate(Pla)	8.72756e-06	1.81487e-05	1.05776e-05	8.94919e-06	1.05154e-05	9.11408e-06	9.77184e-06	5.02961e-06	1.29887e-05	1.19271e-05	1.38071e-05	1.06403e-05	9.67997e-06	9.61029e-06	9.06387e-06	8.45259e-06	9.96475e-06	1.34767e-05	9.3511e-06	6.3565e-06	1.58903e-05	1.29149e-05	1.5516e-05	1.13722e-05	1.44186e-05	8.75052e-06	1.62161e-05	9.9036e-06	2.32541e-05	1.00797e-05	6.95827e-06	1.59541e-05	1.05339e-05	1.45759e-05	1.13204e-05	1.39327e-05	1.70372e-05	1.5617e-05	1.03076e-05	1.35692e-05	1.31642	0.396618	0.00556662	1.17064	up
meta_99	TXB2	5.09883e-05	2.84321e-05	7.20633e-06	3.16201e-05	7.26535e-05	4.45558e-05	2.89579e-05	1.77627e-05	3.95561e-05	4.71779e-05	4.11443e-05	1.25556e-05	5.40621e-05	3.85983e-05	2.10571e-05	1.721e-05	4.66871e-05	2.77059e-05	1.98816e-05	2.12654e-05	3.18083e-05	0.000110696	3.50145e-05	7.80036e-05	7.37109e-05	2.7011e-05	2.60511e-05	5.25589e-05	4.45946e-05	3.69659e-05	3.36413e-05	3.71422e-05	0.000208842	7.36823e-05	0.000176253	5.30238e-05	8.62491e-05	1.40286e-05	3.34539e-05	6.66265e-05	1.99159	0.993923	0.0180969	1.1617	up
meta_101	LPS(22:6/0:0)	5.56935e-06	3.98643e-06	4.08461e-06	4.71421e-06	3.94552e-06	4.82347e-06	2.60931e-06	4.19345e-06	7.44402e-06	4.54484e-06	4.05322e-06	5.072e-06	4.15568e-06	4.9035e-06	3.15608e-06	5.17242e-06	2.95684e-06	3.17461e-06	6.83133e-06	3.55567e-06	5.45928e-06	6.35126e-06	7.4883e-06	5.28071e-06	6.32916e-06	7.76198e-06	1.13273e-05	5.42855e-06	6.96498e-06	9.20822e-06	7.3457e-06	7.68513e-06	7.1839e-06	9.06889e-06	3.75959e-06	9.15677e-06	8.77993e-06	5.61029e-06	4.44733e-06	7.23277e-06	1.62632	0.70161	7.14825e-06	1.76211	up
meta_102	LPG(18:1/0:0)	7.44917e-05	5.00225e-05	5.46226e-05	6.01867e-05	5.31189e-05	5.34051e-05	5.89376e-05	4.5722e-05	5.76964e-05	5.12708e-05	4.80039e-05	5.55884e-05	6.66303e-05	5.99345e-05	5.65765e-05	5.26574e-05	4.79164e-05	4.70326e-05	8.2158e-05	4.81033e-05	6.88733e-05	7.68841e-05	9.26749e-05	6.34574e-05	8.85091e-05	0.000104062	7.79475e-05	8.12911e-05	4.5427e-05	8.96049e-05	0.000105719	7.29567e-05	0.00011379	8.36699e-05	8.75152e-05	9.26848e-05	7.8781e-05	7.49822e-05	5.62038e-05	8.32684e-05	1.48154	0.567101	1.20982e-06	1.9509	up
meta_103	LPE(18:1/0:0)	0.000804945	0.000688233	0.000233504	0.000890027	0.00101164	0.000794028	0.000425001	0.000566111	0.00120782	0.0010889	0.000743008	0.00162609	0.000699302	0.000357695	0.000615105	0.000606325	0.000933094	0.000621308	0.00132599	0.000254151	0.00107265	0.00121498	0.00174723	0.000835768	0.000866213	0.00150391	0.00108117	0.00130883	0.00115871	0.00131821	0.00103001	0.00114112	0.00100084	0.000940691	0.0010949	0.00106205	0.000829923	0.0017176	0.000774614	0.00116249	1.50073	0.585668	0.000546014	1.41367	up
meta_104	LPE(18:0/0:0)	0.00109762	0.000657741	0.000661417	0.00128997	0.0010581	0.0010981	0.00114419	0.000754398	0.00127671	0.0011671	0.00110369	0.0011244	0.000832612	0.00087886	0.00117869	0.000851151	0.00115375	0.000643831	0.00204198	0.000601052	0.00139128	0.00190587	0.0018584	0.00116977	0.002056	0.00232821	0.00238508	0.00180788	0.00114997	0.00231895	0.00143503	0.00139415	0.00189451	0.0015979	0.00176136	0.00195611	0.00122165	0.00170164	0.00103077	0.00174076	1.6888	0.756001	8.56846e-07	1.91806	up
meta_105	LPE(16:0/0:0)	0.00519456	0.00391823	0.00311696	0.00652053	0.00527919	0.00489939	0.00407853	0.00386984	0.00680869	0.00561637	0.00505049	0.00685021	0.00380596	0.00392743	0.00548483	0.00431033	0.0052006	0.00283039	0.0102312	0.00390099	0.00779329	0.0107465	0.0105107	0.00628819	0.00957522	0.0112018	0.0134301	0.00994083	0.00741159	0.0122842	0.0061437	0.00779065	0.00771635	0.00863497	0.0117	0.0120333	0.00612606	0.0113291	0.00504473	0.00948091	1.87937	0.910248	1.67471e-07	2.01756	up
meta_106	LPE(14:0/0:0)	9.30473e-06	9.95207e-06	8.68629e-06	1.41735e-05	1.71761e-05	1.58021e-05	9.79091e-06	1.60528e-05	1.17155e-05	1.52061e-05	1.18461e-05	2.59965e-05	7.99964e-06	1.26451e-05	1.90053e-05	9.68942e-06	1.02056e-05	5.8247e-06	4.25258e-05	1.05759e-05	1.39882e-05	2.86832e-05	3.19991e-05	1.5402e-05	1.31098e-05	1.58059e-05	3.25122e-05	2.81875e-05	1.53423e-05	4.69264e-05	1.52439e-05	1.88548e-05	1.40695e-05	1.44327e-05	3.20403e-05	3.12369e-05	1.26805e-05	3.55752e-05	1.42087e-05	2.31161e-05	1.6269	0.702124	0.00592774	1.21809	up
meta_107	LPA(0:0/18:0)	0.000110688	6.20951e-05	6.13592e-05	9.22459e-05	6.53325e-05	7.25305e-05	8.16914e-05	7.05128e-05	9.32201e-05	7.40732e-05	7.20417e-05	7.99452e-05	8.63345e-05	8.00467e-05	9.49342e-05	8.00775e-05	6.43322e-05	6.94174e-05	0.000206214	5.98989e-05	0.000111674	0.000141286	0.000190529	9.77744e-05	0.000188703	0.000357999	0.000170993	0.000167525	0.000128339	0.000215036	0.000268341	0.000148715	0.000298575	0.000199332	0.000166979	0.00023835	0.000136507	0.000154829	8.38495e-05	0.00018786	2.24045	1.16379	3.80427e-06	1.92406	up
meta_108	LPA(0:0/16:0)	0.000245889	0.000253738	0.000217458	0.000251378	0.000295706	0.000245118	0.000286158	0.000243556	0.000344686	0.000301195	0.000277804	0.000274213	0.000315154	0.000246568	0.000236171	0.000259717	0.000247185	0.000199489	0.000621516	0.000299924	0.000384195	0.000471307	0.00065174	0.000340888	0.000809834	0.000939844	0.000924384	0.000626703	0.000603436	0.000814071	0.000634082	0.000483095	0.000736723	0.000729157	0.000710918	0.00090747	0.000591913	0.000566621	0.000283131	0.000662577	2.34018	1.22662	1.73644e-08	2.18406	up
meta_111	FFA(16:1)	0.00655002	0.0045467	0.00737378	0.00365099	0.00369666	0.00435158	0.00439266	0.0042655	0.00671445	0.00443908	0.00690571	0.00929725	0.00493081	0.00562729	0.00560712	0.00603248	0.00322521	0.00553724	0.00485212	0.0055896	0.00984158	0.0183002	0.00426413	0.00686779	0.0117378	0.0111346	0.0125258	0.0116162	0.00894646	0.0165916	0.00819442	0.00862956	0.0158233	0.0108471	0.0136333	0.0109072	0.00681223	0.0113506	0.00537931	0.0110013	2.04512	1.03218	2.88453e-06	1.98035	up
meta_112	FFA(16:0)	0.00113	0.0010594	0.00144351	0.00154299	0.00144758	0.00144121	0.00169514	0.00155279	0.00162592	0.00157525	0.00211329	0.00180883	0.00172929	0.00187998	0.00175847	0.0015866	0.00151511	0.00177118	0.00160754	0.00209501	0.00213414	0.00271122	0.00205041	0.00244241	0.00269941	0.00252934	0.00266697	0.00219492	0.00235079	0.00243038	0.00195442	0.00207825	0.00272476	0.0022181	0.00258578	0.00261123	0.00206395	0.00235219	0.00161895	0.0023777	1.46867	0.554508	1.14225e-10	2.21976	up
meta_113	FFA(18:2)	0.00172555	0.00155717	0.00180653	0.00203021	0.00171694	0.002072	0.00291558	0.00204784	0.00241605	0.00183453	0.00245458	0.00253495	0.00229881	0.00209922	0.00209136	0.00214116	0.00199966	0.00213497	0.00227728	0.00227196	0.002993	0.00459328	0.00221547	0.00286987	0.00396718	0.00376574	0.00315596	0.0025923	0.00354109	0.00377825	0.00297859	0.00282678	0.00341821	0.00299051	0.00281888	0.00340193	0.00301318	0.00303798	0.00212132	0.0032199	1.51788	0.602057	7.94254e-08	2.08188	up
meta_114	FFA(12:0)	8.01466e-05	9.11975e-05	0.000123969	7.43819e-05	5.38747e-05	6.59644e-05	7.99707e-05	0.000173216	0.000213697	5.62595e-05	7.80826e-05	8.78386e-05	6.04427e-05	6.80692e-05	0.000104364	9.12238e-05	9.15506e-05	7.49631e-05	8.72925e-05	0.000111956	8.7347e-05	0.000274166	0.000126638	0.000173841	0.000153209	0.000298643	0.000157245	0.000131913	0.00011164	0.000280477	0.000104152	0.000132829	0.000171081	8.99296e-05	0.000218866	0.000236022	0.00011419	0.000149837	9.3423e-05	0.000167335	1.79115	0.840887	0.000340257	1.55996	up
meta_115	EPA	0.00058474	0.000196733	0.000495263	0.000252557	0.000513607	0.000548925	0.000223039	0.000257391	0.000228281	0.000263868	0.000407525	0.000614989	0.000215822	0.000259585	0.0010758	0.00079944	0.000371182	0.000360352	0.000477184	0.000230629	0.000380742	0.00055626	0.000548502	0.000461922	0.000447843	0.000490625	0.000942318	0.00089175	0.000389071	0.00126312	0.000719899	0.000825119	0.00046663	0.000384897	0.000470589	0.000928156	0.000658306	0.000548707	0.000418846	0.000631914	1.5087	0.59331	0.00926024	1.12351	up
meta_116	DHA	0.000434099	0.000242053	0.000569425	0.00039665	0.000309335	0.000361989	0.000376031	0.000378809	0.00072335	0.00034199	0.00038819	0.000546006	0.000363293	0.000283367	0.000486094	0.000759601	0.000263861	0.00062228	0.000554857	0.000499603	0.000630109	0.00112814	0.000502086	0.000577857	0.000970227	0.000826151	0.000893855	0.000630241	0.000661777	0.00130584	0.000694919	0.000540954	0.000772076	0.000623818	0.000719932	0.00126488	0.00054179	0.000564476	0.000445044	0.000769396	1.72881	0.789778	4.92394e-05	1.69926	up
meta_117	FFA(20:2)	6.3385e-07	7.29588e-07	9.60903e-07	8.26288e-07	8.63667e-07	1.04201e-06	8.64107e-07	8.04212e-07	1.33945e-06	8.01843e-07	1.42003e-06	1.0852e-06	8.75461e-07	1.03195e-06	1.01011e-06	9.32658e-07	7.56216e-07	1.06166e-06	1.00885e-06	8.15125e-07	9.70004e-07	2.45275e-06	1.08424e-06	1.18766e-06	2.59319e-06	2.08394e-06	1.61079e-06	1.1337e-06	1.46754e-06	1.65045e-06	2.19981e-06	1.52067e-06	1.83714e-06	1.77226e-06	2.03686e-06	2.01299e-06	1.3832e-06	2.00693e-06	9.43158e-07	1.72245e-06	1.82626	0.868893	1.38412e-06	2.02345	up
meta_118	FFA(10:0)	4.27446e-07	5.39493e-07	1.12242e-06	5.0964e-07	3.89232e-07	3.37717e-07	6.43688e-07	4.72555e-07	1.12072e-06	3.72626e-07	8.47193e-07	4.97866e-07	4.70999e-07	6.12287e-07	5.55162e-07	8.22516e-07	4.88591e-07	7.71137e-07	6.45399e-07	8.56722e-07	6.78746e-07	1.29689e-06	5.18884e-07	9.78947e-07	1.24922e-06	1.80844e-06	6.67566e-07	9.76606e-07	7.56063e-07	9.4927e-07	8.28478e-07	9.89512e-07	1.79175e-06	7.91346e-07	7.56184e-07	9.37107e-07	6.956e-07	1.36187e-06	6.2517e-07	1.0018e-06	1.60245	0.68028	0.000848033	1.47784	up
meta_119	AA	0.000252237	0.000175214	0.000198349	0.00025917	0.00022708	0.000252879	0.000224612	0.000233161	0.000276757	0.000277385	0.000297665	0.000242247	0.000286569	0.000238712	0.000316545	0.000198253	0.000241288	0.000212617	0.000234975	0.000269502	0.000361033	0.000551621	0.000442325	0.000382814	0.000520415	0.000515885	0.000441124	0.000287666	0.000396523	0.000556224	0.000353616	0.000247554	0.000442523	0.000428277	0.000381253	0.000385008	0.000392932	0.000369899	0.000245761	0.000414261	1.68563	0.753284	6.06316e-08	2.1598	up
meta_122	Uridine 5-Monophosphate	3.55306e-06	2.60611e-06	5.14268e-06	2.99409e-06	3.07379e-06	4.50257e-06	4.17853e-06	2.78549e-06	5.79266e-06	4.63968e-06	5.26342e-06	5.91443e-06	5.25262e-06	3.49778e-06	4.93681e-06	2.37714e-06	2.49111e-06	5.26891e-06	2.54837e-06	4.00844e-06	4.7733e-06	5.86059e-06	3.32472e-06	8.3082e-06	3.2113e-06	4.85571e-06	3.60249e-06	7.51601e-06	7.47904e-06	5.76015e-06	4.28406e-06	8.31549e-06	5.56387e-06	6.73431e-06	4.43195e-06	3.71557e-06	3.67659e-06	5.42732e-06	4.04138e-06	5.38004e-06	1.33124	0.412767	0.00921942	1.1185	up
meta_123	N6-Succinyl Adenosine	6.42674e-07	1.00118e-06	9.88534e-07	1.26892e-06	1.10798e-06	1.5637e-06	2.11554e-06	7.76276e-07	1.18949e-06	2.33461e-06	1.45164e-06	9.70988e-07	9.05361e-07	1.13854e-06	8.68353e-07	5.64947e-07	1.03578e-06	9.17491e-07	8.72888e-07	8.54856e-07	1.2617e-06	1.80388e-06	4.06279e-06	1.00491e-06	1.50806e-06	1.35228e-06	6.75539e-06	1.38413e-06	2.54429e-06	2.85196e-06	1.94573e-06	2.33337e-06	1.6112e-06	1.58081e-06	2.3134e-06	1.83445e-06	3.2348e-06	1.85346e-06	1.12849e-06	2.29092e-06	2.03008	1.02154	0.00232061	1.3161	up
meta_125	2-(Dimethylamino)Guanosine	1.06565e-05	1.13107e-05	1.22598e-05	1.18126e-05	9.72604e-06	1.06604e-05	1.81349e-05	9.14043e-06	1.32419e-05	1.16177e-05	1.44664e-05	1.34396e-05	8.27921e-06	1.0478e-05	9.84608e-06	1.24609e-05	1.02577e-05	1.24043e-05	1.11614e-05	9.23903e-06	1.31624e-05	1.21029e-05	1.14758e-05	1.55099e-05	1.10599e-05	1.27364e-05	2.37791e-05	1.45277e-05	1.77257e-05	1.397e-05	1.26602e-05	1.65592e-05	1.25271e-05	1.39983e-05	1.31858e-05	1.49333e-05	2.18787e-05	1.74416e-05	1.15297e-05	1.49574e-05	1.2973	0.375511	0.00119517	1.29603	up
meta_127	Β-Pseudouridine	0.000162766	0.000205027	0.000181798	0.000176376	0.000174883	0.000195078	0.000228935	0.000179112	0.000176522	0.000204579	0.000199979	0.000180364	0.000159996	0.000176868	0.00019162	0.00023188	0.00021795	0.000194936	0.000157074	0.000196329	0.000250226	0.000235432	0.000181314	0.00024256	0.000175052	0.000173477	0.000305376	0.000230795	0.000226907	0.000239625	0.00020516	0.000272662	0.000189653	0.000208922	0.00017624	0.000187848	0.000332761	0.000269221	0.000189604	0.000227957	1.20228	0.265777	0.00360967	1.22448	up
meta_129	2'-Deoxycytidine-5'-Monophosphate	9.32898e-06	1.3592e-05	8.47245e-06	8.95122e-06	1.07987e-05	1.35008e-05	1.4228e-05	1.23625e-05	1.3707e-05	1.19524e-05	1.21224e-05	1.11243e-05	9.3193e-06	1.22352e-05	1.03806e-05	1.42746e-05	1.85598e-05	1.30903e-05	7.91105e-06	1.6731e-05	1.06557e-05	1.08909e-05	2.99588e-05	1.05514e-05	2.85547e-05	1.37669e-05	1.55305e-05	1.55758e-05	1.61292e-05	1.95509e-05	1.13803e-05	1.96008e-05	1.82945e-05	1.76793e-05	1.66966e-05	1.41678e-05	2.12803e-05	1.56834e-05	1.21321e-05	1.69971e-05	1.401	0.486456	0.00230692	1.33477	up
meta_132	D-Fructose 6-Phosphate-Disodium Salt	1.52432e-06	3.20342e-06	4.46546e-06	2.58127e-06	3.09858e-06	2.53909e-06	1.75177e-06	1.74319e-06	2.66764e-06	3.16601e-06	1.70552e-06	3.78878e-06	2.07389e-06	3.72585e-06	5.42743e-06	2.6632e-06	2.14053e-06	1.96104e-06	3.02629e-06	1.62154e-06	4.12766e-06	3.88734e-06	1.3106e-06	4.56632e-06	2.86071e-06	1.95799e-06	7.31659e-06	7.68628e-06	3.38372e-06	3.78615e-06	5.02892e-06	4.39558e-06	4.413e-06	4.16581e-06	4.53146e-06	4.57611e-06	5.84129e-06	8.07931e-06	2.74374e-06	4.55082e-06	1.65862	0.729984	0.000862951	1.43312	up
meta_133	Aminomalonic Acid	2.19709e-05	1.85934e-05	1.94379e-05	1.60547e-05	1.39625e-05	1.89673e-05	2.3368e-05	1.47427e-05	1.89725e-05	1.91169e-05	2.01452e-05	1.58695e-05	1.5811e-05	1.98092e-05	1.75202e-05	1.88761e-05	1.18934e-05	1.3504e-05	2.12617e-05	1.64596e-05	1.92884e-05	2.43164e-05	2.39127e-05	1.93539e-05	3.3593e-05	2.02981e-05	3.03295e-05	2.47954e-05	2.92952e-05	1.86805e-05	2.24229e-05	2.1166e-05	3.19101e-05	3.07812e-05	3.6926e-05	2.98619e-05	2.68843e-05	1.78949e-05	1.78168e-05	2.56506e-05	1.43968	0.52575	2.36667e-05	1.77264	up
meta_134	3-Methyl-2-Oxobutanoic Acid	2.18554e-06	3.08578e-06	2.58116e-06	1.85294e-06	2.75015e-06	3.36335e-06	2.42997e-06	2.43188e-06	4.14275e-06	3.41153e-06	3.02205e-06	2.25171e-06	1.98548e-06	2.67837e-06	2.9506e-06	2.50602e-06	2.39332e-06	3.15883e-06	3.15535e-06	2.65243e-06	2.77766e-06	4.05229e-06	2.44866e-06	3.7427e-06	4.0826e-06	3.37493e-06	2.25278e-06	4.9677e-06	4.48952e-06	3.94214e-06	4.3564e-06	3.96465e-06	4.3352e-06	5.69428e-06	6.56364e-06	5.72628e-06	4.81725e-06	4.44939e-06	2.74946e-06	4.22434e-06	1.53642	0.619576	3.36121e-05	1.76352	up
meta_135	8,15-Dihete	9.29e-05	6.6348e-05	0.000110954	4.51214e-05	6.43583e-05	5.7633e-05	4.66124e-05	6.14675e-05	8.45375e-05	3.53901e-05	9.17991e-05	0.000104737	5.44567e-05	6.29339e-05	7.41963e-05	8.19991e-05	2.72655e-05	5.58201e-05	7.05857e-05	5.22828e-05	0.000113822	0.000191385	3.87661e-05	8.81057e-05	0.000130689	0.00012416	0.000120001	0.000129068	8.05891e-05	0.000184687	9.61307e-05	8.09715e-05	0.000187698	0.000122078	0.000178048	0.000134551	5.11129e-05	0.000120289	6.70699e-05	0.000120675	1.79924	0.84739	0.000106172	1.70523	up
meta_137	Ribulose-5-Phosphate	1.76021e-05	1.52274e-05	2.20953e-05	1.96231e-05	1.81047e-05	2.06311e-05	1.75788e-05	2.02181e-05	1.94437e-05	1.57444e-05	1.46975e-05	2.08848e-05	2.08003e-05	2.25436e-05	1.84239e-05	1.9117e-05	2.78552e-05	1.6059e-05	2.65311e-05	2.89343e-05	2.22038e-05	2.00172e-05	0.000175306	2.99987e-05	5.53135e-05	4.41273e-05	4.67831e-05	2.52804e-05	3.52278e-05	6.1871e-05	4.03073e-05	2.14608e-05	9.61615e-05	3.5355e-05	2.83696e-05	2.91455e-05	2.49607e-05	2.45484e-05	2.01058e-05	4.53577e-05	2.25595	1.17374	0.0110242	1.18953	up
meta_139	2-Deoxyribose 1-Phosphate	2.60325e-05	4.2667e-05	5.4862e-05	4.48327e-05	5.1173e-05	4.68193e-05	3.35243e-05	4.02657e-05	4.27733e-05	4.15417e-05	5.07062e-05	4.91458e-05	4.08422e-05	4.07222e-05	3.25713e-05	3.61818e-05	5.64486e-05	3.95715e-05	4.39273e-05	3.43451e-05	4.52714e-05	4.2678e-05	4.37577e-05	5.98294e-05	5.50387e-05	4.6496e-05	4.81755e-05	6.40271e-05	5.19279e-05	4.74223e-05	5.71544e-05	6.25628e-05	3.86353e-05	5.26168e-05	5.59275e-05	6.14143e-05	5.81693e-05	5.53202e-05	4.24477e-05	5.25791e-05	1.23868	0.308805	0.000221268	1.48691	up
meta_140	N-Acetylglucosamine 1-Phosphate	2.24077e-05	3.51511e-05	3.40159e-05	2.6943e-05	3.19239e-05	2.28903e-05	2.81587e-05	2.15591e-05	2.58321e-05	2.61575e-05	3.17365e-05	2.944e-05	1.99498e-05	1.87724e-05	2.14159e-05	3.58175e-05	3.68976e-05	2.63294e-05	2.25951e-05	1.55983e-05	3.10941e-05	3.69637e-05	4.30379e-05	3.35434e-05	2.69532e-05	3.15043e-05	3.85169e-05	3.41754e-05	3.44914e-05	2.48444e-05	2.42504e-05	5.54257e-05	2.59893e-05	2.42423e-05	3.84661e-05	2.51285e-05	4.44855e-05	4.48272e-05	2.66796e-05	3.433e-05	1.28675	0.363733	0.00423095	1.24402	up
meta_143	Hydroxyphenyllactic acid	2.50879e-06	6.31632e-06	1.19322e-06	2.59536e-06	4.05796e-06	3.15929e-06	2.82096e-06	1.34092e-06	3.5726e-06	4.76473e-06	4.70676e-06	3.21502e-06	3.14438e-06	3.21566e-06	2.13544e-06	2.86523e-06	3.17845e-06	4.2704e-06	3.51403e-06	1.48308e-06	6.17886e-06	5.69675e-06	6.12649e-06	5.73428e-06	5.23981e-06	4.20212e-06	9.03933e-06	7.02389e-06	1.05988e-05	5.07539e-06	3.49495e-06	1.14004e-05	1.02941e-05	9.50341e-06	6.15884e-06	7.67064e-06	8.63245e-06	7.68004e-06	3.20293e-06	7.20836e-06	2.25055	1.17028	5.58552e-07	1.98777	up
meta_146	N-lactoyl-phenylalanine	3.58175e-05	6.93802e-05	2.25533e-05	3.85469e-05	4.78255e-05	3.63937e-05	6.67721e-05	2.01755e-05	6.50502e-05	4.0565e-05	5.19154e-05	4.89741e-05	3.76753e-05	4.89848e-05	4.64434e-05	4.73223e-05	4.81635e-05	2.7495e-05	4.1326e-05	1.67558e-05	5.00598e-05	8.94712e-05	0.000217149	7.07257e-05	0.00014949	5.94579e-05	0.000142627	7.02455e-05	0.000106249	6.936e-05	8.2621e-05	9.41931e-05	0.000165672	9.86814e-05	0.000106577	7.73747e-05	0.000103003	0.000106678	4.29068e-05	0.000103313	2.40785	1.26775	1.00788e-05	1.89838	up
meta_148	Glycerophosphoric acid	1.66563e-05	1.31368e-05	1.63477e-05	1.37114e-05	1.34653e-05	2.20465e-05	9.42393e-06	1.14297e-05	3.35093e-05	1.94394e-05	1.47056e-05	3.47319e-05	2.32657e-05	1.54685e-05	1.45392e-05	1.94116e-05	2.11362e-05	2.4757e-05	2.30475e-05	2.52385e-05	3.46139e-05	1.68606e-05	0.000213475	3.19932e-05	0.000108969	9.48438e-05	9.29371e-05	3.65975e-05	7.40187e-05	8.32109e-05	5.38132e-05	4.39245e-05	8.92585e-05	5.87417e-05	4.16972e-05	6.79091e-05	2.721e-05	3.94555e-05	1.92734e-05	6.71961e-05	3.48647	1.80177	0.000328684	1.61519	up
meta_150	Tetradecanedioic acid	4.17391e-05	5.02559e-05	4.56569e-05	3.04396e-05	5.29219e-05	2.71492e-05	3.75289e-05	6.42008e-05	3.15676e-05	2.72137e-05	7.4113e-05	4.36711e-05	4.28063e-05	3.5637e-05	4.82887e-05	3.47697e-05	5.74162e-05	4.57319e-05	4.12138e-05	6.82743e-05	7.32437e-05	0.000122198	4.93488e-05	8.91159e-05	6.13527e-05	8.09705e-05	7.2238e-05	6.14261e-05	8.65393e-05	7.35322e-05	5.8944e-05	0.000105366	9.599e-05	5.00044e-05	6.24951e-05	4.24963e-05	0.00016926	9.82461e-05	4.50298e-05	8.07093e-05	1.79235	0.841855	0.000139196	1.66318	up
meta_155	D-Xylulose 5-phosphate	1.76021e-05	1.52274e-05	2.20953e-05	1.96231e-05	1.81047e-05	2.06311e-05	1.75788e-05	2.02181e-05	1.94437e-05	1.57444e-05	1.46975e-05	2.08848e-05	2.08003e-05	2.25436e-05	1.84239e-05	1.9117e-05	2.78552e-05	1.6059e-05	2.65311e-05	2.89343e-05	2.22038e-05	2.00172e-05	0.000175306	2.99987e-05	5.53135e-05	4.41273e-05	4.67831e-05	2.52804e-05	3.52278e-05	6.1871e-05	4.03073e-05	2.14608e-05	9.61615e-05	3.5355e-05	2.83696e-05	2.91455e-05	2.49607e-05	2.45484e-05	2.01058e-05	4.53577e-05	2.25595	1.17374	0.0110242	1.18953	up
meta_156	Hexadecanedioic acid	6.20544e-05	9.67558e-05	9.34106e-05	3.93425e-05	8.74281e-05	3.19626e-05	5.65037e-05	8.17033e-05	5.94298e-05	3.57314e-05	0.00011713	5.29313e-05	6.954e-05	5.04235e-05	5.50695e-05	5.23671e-05	0.000290831	0.000121703	5.01344e-05	9.50941e-05	0.000136284	0.00024287	0.000118718	0.000104104	0.000109849	0.000135691	9.57277e-05	7.9338e-05	0.000153764	8.62115e-05	8.66062e-05	0.000104378	0.000153303	7.25547e-05	9.64813e-05	6.02613e-05	0.000378475	0.000125113	7.99773e-05	0.000129985	1.62527	0.700682	0.0270707	1.00227	up
meta_160	2,5-Furandicarboxylicacid	0.000209273	0.000190003	0.000240404	0.000203468	0.000203735	0.000254248	0.000261673	0.000276873	0.000210814	0.000223451	0.000225637	0.000197045	0.000217648	0.000234967	0.000212519	0.000227628	0.00022048	0.000249179	0.000239852	0.000284639	0.000205689	0.000180327	0.000188919	0.000224912	0.000196959	0.000177189	0.000168241	0.000161933	0.000160686	0.000166992	0.000210894	0.000184374	0.000206825	0.000209006	0.000238247	0.000180601	0.000226148	0.000230801	0.000229177	0.000195486	0.852991	-0.229397	0.00023034	1.51544	down
meta_174	(±)4-HDHA	6.67622e-07	5.59016e-07	4.10201e-07	6.59155e-07	5.9475e-07	5.16553e-07	4.32992e-07	6.43008e-07	8.36339e-07	5.68422e-07	4.00391e-07	9.18748e-07	7.0484e-07	6.66076e-07	5.23733e-07	8.78146e-07	2.21024e-07	8.40618e-07	1.2946e-06	1.28787e-06	6.4827e-07	1.17088e-06	1.19663e-06	7.73871e-07	1.087e-06	1.38305e-06	1.32243e-06	8.48647e-07	9.73675e-07	1.77781e-06	8.14186e-07	8.50474e-07	2.11629e-06	1.71426e-06	1.52761e-06	1.85053e-06	1.02814e-06	1.04445e-06	6.81206e-07	1.22934e-06	1.80466	0.851726	5.73481e-05	1.6949	up
meta_175	(±)5-HEPE	7.30367e-07	4.27583e-07	5.51431e-07	4.21858e-07	7.20773e-07	8.44265e-07	6.61985e-07	3.32641e-07	4.99635e-07	3.44135e-07	9.14614e-07	1.06717e-06	4.04534e-07	5.99467e-07	1.48284e-06	7.66495e-07	4.93487e-07	5.88556e-07	1.10246e-06	2.14007e-07	5.53428e-07	1.31419e-06	7.00291e-07	5.39472e-07	6.29836e-07	6.50107e-07	1.57786e-06	1.31986e-06	4.68883e-07	1.38143e-06	8.90715e-07	1.32998e-06	9.14423e-07	6.17729e-07	8.12013e-07	1.46538e-06	6.76563e-07	1.08352e-06	6.58415e-07	9.40315e-07	1.42815	0.514147	0.015759	1.08994	up
meta_176	(±)5-HETE	1.00158e-05	6.46174e-06	3.96847e-06	4.10704e-06	8.05547e-06	5.2176e-06	5.52329e-06	5.59553e-06	6.85593e-06	7.75915e-06	1.50866e-05	7.27321e-06	4.2552e-06	5.04463e-06	4.56891e-06	5.46603e-06	5.31795e-06	4.80221e-06	4.91325e-06	7.50469e-06	6.79924e-06	1.20926e-05	1.06596e-05	7.75033e-06	9.80848e-06	8.41927e-06	6.73469e-06	5.73503e-06	5.38995e-06	8.85238e-06	7.43657e-06	1.00362e-05	1.3047e-05	1.33919e-05	1.10066e-05	6.0392e-06	8.09892e-06	1.22509e-05	6.38964e-06	9.08605e-06	1.422	0.507918	0.00265816	1.30323	up
meta_177	(±)9-HETE	1.00158e-05	6.46174e-06	3.96847e-06	4.10704e-06	8.05547e-06	5.2176e-06	5.52329e-06	5.59553e-06	6.85593e-06	7.75915e-06	1.50866e-05	7.27321e-06	4.2552e-06	5.04463e-06	4.56891e-06	5.46603e-06	5.31795e-06	4.80221e-06	4.91325e-06	7.50469e-06	6.79924e-06	1.20926e-05	1.06596e-05	7.75033e-06	9.80848e-06	8.41927e-06	6.73469e-06	5.73503e-06	5.38995e-06	8.85238e-06	7.43657e-06	1.00362e-05	1.3047e-05	1.33919e-05	1.10066e-05	6.0392e-06	8.09892e-06	1.22509e-05	6.38964e-06	9.08605e-06	1.422	0.507918	0.00265816	1.30323	up
meta_178	11,12-EET	1.40243e-05	1.06087e-05	2.98996e-06	8.73736e-06	1.62621e-05	1.08587e-05	1.36854e-05	6.33818e-06	1.69012e-05	1.05342e-05	1.20839e-05	5.31351e-06	1.48509e-05	1.20391e-05	1.15851e-05	8.5803e-06	1.87892e-05	5.92927e-06	4.99504e-06	5.38261e-06	8.74528e-06	2.57168e-05	2.73504e-05	1.90764e-05	1.89917e-05	6.84654e-06	7.61165e-06	9.03132e-06	1.05526e-05	8.88731e-06	9.92992e-06	8.81073e-06	3.19441e-05	1.6784e-05	2.74369e-05	1.19573e-05	1.63514e-05	8.38077e-06	1.05245e-05	1.52447e-05	1.44851	0.534566	0.0375516	1.01466	up
meta_182	15-oxoETE	7.50186e-07	5.06954e-07	1.28319e-07	4.39585e-07	3.2157e-07	5.03189e-07	3.10686e-07	3.0919e-07	7.98922e-07	3.54252e-07	6.5632e-07	3.76866e-07	6.19903e-07	6.92339e-07	7.06361e-07	3.43778e-07	5.645e-07	1.08693e-07	2.56602e-07	2.79967e-07	2.70663e-07	8.86956e-07	1.43821e-06	7.17086e-07	7.93717e-07	3.31201e-07	6.70623e-07	4.27934e-07	3.65944e-07	4.31504e-07	3.821e-07	5.62748e-07	1.70917e-06	8.26808e-07	6.18694e-07	5.22427e-07	8.56427e-07	5.72406e-07	4.51409e-07	6.88034e-07	1.52419	0.608045	0.025346	1.05348	up
meta_183	19(S)-HETE	3.74972e-07	3.53154e-07	3.39861e-07	3.86662e-07	3.31058e-07	3.55639e-07	1.6078e-07	2.99163e-07	2.93836e-07	2.253e-07	5.82873e-07	2.3637e-07	5.9636e-07	7.97468e-07	8.87187e-07	5.02148e-07	3.91593e-07	3.2933e-07	3.81109e-07	4.35921e-07	3.65782e-07	1.02661e-06	1.26393e-06	6.57566e-07	1.23683e-06	7.13511e-07	5.40309e-07	3.2311e-07	7.39391e-07	4.03995e-07	5.49954e-07	5.14659e-07	9.91068e-07	1.18985e-06	4.52743e-07	5.16055e-07	7.36297e-07	1.00612e-06	4.13039e-07	7.34877e-07	1.7792	0.831225	0.000664305	1.53075	up
meta_184	20-HETE	3.74972e-07	3.53154e-07	3.39861e-07	3.86662e-07	3.31058e-07	3.55639e-07	1.6078e-07	2.99163e-07	2.93836e-07	2.253e-07	5.82873e-07	2.3637e-07	5.9636e-07	7.97468e-07	8.87187e-07	5.02148e-07	3.91593e-07	3.2933e-07	3.81109e-07	4.35921e-07	3.65782e-07	1.02661e-06	1.26393e-06	6.57566e-07	1.23683e-06	7.13511e-07	5.40309e-07	3.2311e-07	7.39391e-07	4.03995e-07	5.49954e-07	5.14659e-07	9.91068e-07	1.18985e-06	4.52743e-07	5.16055e-07	7.36297e-07	1.00612e-06	4.13039e-07	7.34877e-07	1.7792	0.831225	0.000664305	1.53075	up
meta_186	5,6-DiHETrE	3.9342e-06	2.91363e-06	9.38612e-07	1.40014e-06	1.87976e-06	2.40813e-06	2.03242e-06	2.91326e-06	2.23884e-06	2.93101e-06	3.14527e-06	2.00255e-06	1.56678e-06	2.22193e-06	3.16867e-06	2.40298e-06	1.37126e-06	2.60395e-06	3.13455e-06	5.12907e-06	2.40715e-06	6.53217e-06	5.97181e-06	2.21754e-06	5.53174e-06	5.94221e-06	9.94357e-06	3.52195e-06	6.73018e-06	5.0282e-06	4.3477e-06	3.08856e-06	3.90161e-06	5.48032e-06	4.02026e-06	5.58302e-06	3.00431e-06	2.6539e-06	2.51685e-06	4.77257e-06	1.89625	0.923146	0.000157588	1.62779	up
meta_187	5-HETrE	2.05502e-06	2.41101e-06	6.84764e-07	1.65534e-06	2.23488e-06	2.17148e-06	3.02083e-06	6.38391e-07	3.13495e-06	1.16381e-06	1.75537e-06	1.35211e-06	1.74128e-06	2.23746e-06	2.22361e-06	1.99181e-06	3.403e-06	1.15459e-06	6.93796e-07	1.22962e-06	1.0178e-06	4.30806e-06	7.13298e-06	3.2041e-06	3.42589e-06	1.08503e-06	2.51091e-06	1.91123e-06	2.37656e-06	1.36791e-06	1.73626e-06	1.89057e-06	4.55799e-06	2.41484e-06	4.10442e-06	2.17017e-06	2.7905e-06	3.27981e-06	1.84766e-06	2.84917e-06	1.54204	0.624844	0.0181491	1.10297	up
meta_191	FFA(14:0)	1.04577e-06	8.85996e-07	1.1687e-06	7.31405e-07	7.60212e-07	1.16152e-06	1.14945e-06	8.69125e-07	1.21108e-06	7.8985e-07	1.408e-06	1.65918e-06	9.24696e-07	8.92273e-07	1.02346e-06	1.0155e-06	6.40204e-07	1.05184e-06	1.3033e-06	1.20288e-06	1.21639e-06	2.98381e-06	1.22952e-06	1.37069e-06	1.7472e-06	1.63438e-06	1.9743e-06	1.59906e-06	1.0913e-06	2.98527e-06	1.53057e-06	1.61445e-06	1.94229e-06	1.47312e-06	2.87585e-06	2.47181e-06	1.77812e-06	1.44065e-06	1.04472e-06	1.83104e-06	1.75266	0.809547	3.69843e-05	1.79035	up
meta_192	Myoinositol	6.25546e-06	6.4367e-06	1.38632e-05	1.03347e-05	9.32401e-06	8.50954e-06	7.20271e-06	1.20775e-05	8.54024e-06	1.02797e-05	8.20535e-06	8.27368e-06	1.26057e-05	7.78254e-06	7.56111e-06	1.00102e-05	7.05732e-06	6.0217e-06	1.19639e-05	8.23989e-06	1.55689e-05	1.04923e-05	3.96142e-06	1.25669e-05	9.81934e-06	1.25536e-05	1.1953e-05	1.35088e-05	1.44367e-05	1.16153e-05	1.3298e-05	1.39833e-05	7.24896e-06	1.14333e-05	1.06557e-05	9.75718e-06	1.40134e-05	1.43095e-05	9.02725e-06	1.1732e-05	1.29962	0.378087	0.00278026	1.24274	up
meta_201	3-Dehydroshikimate	1.54996e-05	1.07563e-05	2.33534e-05	2.13755e-05	1.34064e-05	1.76225e-05	2.194e-05	2.49275e-05	2.18724e-05	2.7837e-05	2.91274e-05	1.59695e-05	2.57151e-05	1.81009e-05	1.95179e-05	2.96726e-05	2.86155e-05	2.6252e-05	2.44919e-05	2.69238e-05	1.32434e-05	1.96589e-05	1.4318e-05	2.73071e-05	6.34386e-06	1.58938e-05	8.82283e-06	5.82102e-06	8.3119e-06	1.4648e-05	2.22149e-05	1.17489e-05	9.54416e-06	1.00572e-05	2.61778e-05	1.4121e-05	2.47012e-05	9.48459e-06	2.21489e-05	1.45788e-05	0.65822	-0.603358	0.000692958	1.39997	down
meta_206	Inosine	0.0165572	0.0191321	0.00840151	0.00885473	0.0126476	0.0105796	0.0100877	0.00460705	0.00849785	0.0100305	0.00863744	0.00986323	0.00449239	0.012634	0.00812774	0.019371	0.00837023	0.0212587	3.29474e-05	0.009861	0.00772636	0.0123294	0.0038303	0.0135875	5.86303e-05	2.08637e-05	0.000183905	0.000309781	0.000154648	2.14899e-05	6.24024e-05	0.00202139	4.56404e-05	5.96707e-05	0.000169749	0.000790761	0.000188456	0.00442768	0.0106022	0.00255493	0.24098	-2.05301	8.71714e-06	1.7383	down
meta_208	Uric acid	0.000697572	0.00109114	0.000169514	0.000810146	0.000772487	0.000814504	0.00125899	0.000173452	0.00141007	0.00141161	0.00130022	0.00103049	8.87824e-05	0.00023658	0.000302266	0.00110516	0.000434607	0.000557291	0.000611484	0.000252616	0.000486365	0.00220803	0.00116422	0.000692247	0.00122139	0.000637743	0.00584363	0.00121212	0.00319906	0.00124021	0.00152742	0.00262892	0.00139258	0.00153918	0.00131871	0.00165807	0.00161012	0.00169615	0.000726449	0.00173756	2.39186	1.25813	0.00326451	1.3008	up
meta_209	Diphenylamine	1.60456e-05	1.84409e-05	1.84341e-05	1.90146e-05	1.98549e-05	1.98818e-05	1.9608e-05	1.81391e-05	1.79853e-05	1.81443e-05	1.85671e-05	1.5409e-05	1.82195e-05	1.93661e-05	1.77502e-05	1.84044e-05	1.7929e-05	1.89609e-05	1.76647e-05	1.9486e-05	1.74921e-05	1.51166e-05	1.46936e-05	1.54635e-05	1.37412e-05	1.26461e-05	1.23011e-05	1.37314e-05	1.51857e-05	1.17562e-05	1.49099e-05	1.41959e-05	1.48562e-05	1.23835e-05	1.54322e-05	1.35583e-05	1.76555e-05	1.43223e-05	1.83653e-05	1.44134e-05	0.784819	-0.349568	1.15449e-09	2.20454	down
meta_210	3-hydroxyphenylacetic acid	1.5186e-05	2.21212e-05	1.94602e-05	1.75184e-05	1.68504e-05	1.99199e-05	1.93547e-05	2.05784e-05	2.64026e-05	2.31195e-05	3.08488e-05	2.53273e-05	1.89092e-05	2.02918e-05	5.66117e-06	1.02803e-05	1.17822e-05	1.92644e-05	7.69969e-06	1.93952e-05	1.74564e-05	1.39077e-05	1.7099e-05	1.75304e-05	7.97743e-06	4.69136e-06	9.85525e-06	8.43757e-06	9.98393e-06	5.46398e-06	6.17382e-06	2.33194e-05	6.98015e-06	1.14356e-05	2.20466e-05	6.06164e-06	8.78629e-06	4.86781e-06	1.84986e-05	1.12264e-05	0.606877	-0.720524	0.000699805	1.44132	down
meta_213	13(R)-HODE	2.77223e-05	2.50034e-05	1.93516e-05	1.69342e-05	2.38806e-05	1.97604e-05	2.64614e-05	1.40273e-05	4.78522e-05	1.32412e-05	3.40658e-05	1.73845e-05	2.62982e-05	1.80766e-05	2.2756e-05	2.47569e-05	6.47131e-05	2.78091e-05	1.45479e-05	1.28243e-05	2.07527e-05	6.20117e-05	5.09972e-05	4.60596e-05	3.9227e-05	3.15853e-05	2.29782e-05	2.12761e-05	5.74575e-05	2.46176e-05	4.06841e-05	2.82052e-05	4.26662e-05	2.40413e-05	3.43037e-05	3.32598e-05	4.79581e-05	3.50683e-05	2.48733e-05	3.68416e-05	1.48117	0.566737	0.00556619	1.22211	up
meta_215	2-Amino-4,6-pteridinediol	1.04544e-06	1.75788e-06	1.4798e-06	2.46458e-06	9.38485e-07	1.62692e-06	2.97614e-06	1.05962e-06	1.99222e-06	1.63784e-06	1.46732e-06	1.55547e-06	1.71117e-06	1.0941e-06	7.61735e-07	1.10606e-06	1.29881e-06	1.87833e-06	1.54415e-06	1.45191e-06	1.37937e-06	1.98785e-06	2.33562e-06	2.31187e-06	1.6994e-06	1.54162e-06	4.83331e-06	1.93986e-06	5.26996e-06	3.53248e-06	2.71126e-06	3.18925e-06	1.95036e-06	1.84374e-06	3.13744e-06	2.44577e-06	3.77217e-06	4.83512e-06	1.5424e-06	2.81758e-06	1.82675	0.869282	0.000386577	1.48332	up
meta_216	2-Hydroxyglutaric acid	3.687e-06	1.03296e-06	8.17205e-07	2.20111e-06	6.08794e-06	3.06912e-06	4.26252e-06	2.63816e-06	2.64826e-06	2.25556e-06	7.60005e-06	4.91655e-06	2.21901e-06	2.95669e-06	2.88763e-06	1.9908e-06	5.91647e-06	5.00968e-06	3.21345e-06	2.75015e-06	4.61986e-06	2.72877e-06	1.75259e-05	3.42378e-06	8.51655e-06	5.96846e-06	1.19754e-05	3.58727e-06	7.44696e-06	3.91259e-06	5.19932e-06	1.01356e-05	8.61544e-06	9.43711e-06	7.26514e-06	5.19055e-06	1.14652e-05	8.51279e-06	3.40802e-06	7.52926e-06	2.20928	1.14358	0.000279627	1.55392	up
meta_217	Iminodiacetic acid	0.000218021	0.000169985	0.00023395	0.000166889	0.000159365	0.000202797	0.000245733	0.00014335	0.000218142	0.000153936	0.000165647	0.000127569	0.000152513	0.000241894	0.000264979	0.000247743	0.000217847	0.000221617	0.00010371	0.000207438	0.00011342	0.000179848	0.000200911	0.000167553	7.89755e-05	0.000131099	7.26284e-05	0.000140679	0.000100296	7.99606e-05	0.000132312	0.000139611	7.81179e-05	8.83472e-05	5.61304e-05	9.18329e-05	0.000200954	0.000173994	0.000193156	0.000123704	0.640435	-0.642877	4.23612e-05	1.64666	down
meta_220	N-arachidene glycine	4.88045e-07	4.87966e-07	3.95836e-07	1.4595e-06	5.52965e-07	4.59768e-07	4.18901e-07	9.95204e-07	3.71638e-07	5.34724e-07	1.21659e-06	5.87085e-07	4.40266e-07	7.31589e-07	4.1587e-07	4.84674e-07	6.11896e-07	6.48764e-07	4.71474e-07	8.48848e-07	1.25034e-06	1.36647e-06	1.10017e-06	1.15149e-06	1.22025e-06	1.61309e-06	1.88704e-06	8.0296e-07	1.42624e-06	6.05574e-07	7.62197e-07	4.62318e-07	8.10897e-07	1.05691e-06	4.31801e-07	5.98833e-07	8.5889e-07	8.10037e-07	6.3108e-07	1.01197e-06	1.60356	0.681275	0.00233864	1.25571	up
meta_221	Gly-Val	2.86555e-06	2.52773e-06	2.36196e-05	4.58004e-06	6.03259e-06	5.21887e-06	2.83669e-06	5.71977e-06	8.11677e-06	7.96298e-06	1.53258e-06	7.21568e-06	3.41693e-06	4.27258e-06	3.42438e-06	5.98996e-06	2.94772e-06	3.1951e-06	9.96752e-07	8.88266e-06	5.73085e-06	5.56162e-06	3.25217e-07	8.74372e-06	1.54513e-07	7.90783e-07	3.25051e-07	3.0994e-06	3.49184e-07	6.47571e-07	4.25897e-07	5.52497e-07	7.64385e-08	8.64303e-07	6.23325e-07	8.25521e-07	2.16007e-06	2.43148e-06	5.56775e-06	1.87152e-06	0.336137	-1.57288	0.00505226	1.18063	down
meta_223	cis-EODA	8.33143e-06	8.23514e-06	1.50182e-05	6.52337e-06	8.33971e-06	7.1029e-06	6.51403e-06	6.32671e-06	1.33981e-05	5.00095e-06	1.13278e-05	8.56594e-06	8.98712e-06	6.35109e-06	5.92434e-06	1.06842e-05	9.65917e-06	1.84069e-05	5.94986e-06	9.80801e-06	7.58138e-06	1.29308e-05	9.36466e-06	1.3567e-05	1.56162e-05	1.51212e-05	5.47436e-06	9.49694e-06	2.30949e-05	1.51542e-05	1.94548e-05	1.13893e-05	1.07319e-05	1.23052e-05	1.27931e-05	1.1523e-05	1.3148e-05	1.13232e-05	9.02275e-06	1.27817e-05	1.41661	0.502439	0.00432138	1.2078	up
meta_224	FFA(22:6)	0.000434099	0.000242053	0.000569425	0.00039665	0.000309335	0.000361989	0.000376031	0.000378809	0.00072335	0.00034199	0.00038819	0.000546006	0.000363293	0.000283367	0.000486094	0.000759601	0.000263861	0.00062228	0.000554857	0.000499603	0.000630109	0.00112814	0.000502086	0.000577857	0.000970227	0.000826151	0.000893855	0.000630241	0.000661777	0.00130584	0.000694919	0.000540954	0.000772076	0.000623818	0.000719932	0.00126488	0.00054179	0.000564476	0.000445044	0.000769396	1.72881	0.789778	4.92394e-05	1.69926	up
meta_230	16-Hydroxyhexadecanoic acid	0.000477342	0.000417528	0.000432597	0.000409729	0.000523564	0.000546089	0.000549097	0.000519532	0.000867881	0.000597696	0.000625069	0.000675464	0.000612815	0.000621665	0.000603008	0.000600244	0.000637778	0.000516844	0.000573006	0.000597305	0.000899528	0.00101603	0.00113499	0.000832474	0.000815407	0.00108219	0.00111638	0.00100214	0.000958581	0.0010326	0.000710119	0.000817593	0.000895624	0.000749626	0.000691211	0.000763488	0.000971394	0.000677936	0.000570213	0.000898184	1.57517	0.65551	9.76688e-09	2.10501	up
meta_237	DL-2-hydroxystearic acid	1.67362e-05	1.61834e-05	1.48859e-05	1.61658e-05	1.79895e-05	1.59743e-05	1.87477e-05	1.76304e-05	2.13939e-05	1.78516e-05	1.81361e-05	1.68721e-05	1.74376e-05	2.08064e-05	1.99016e-05	2.16989e-05	1.55599e-05	1.07794e-05	1.69438e-05	1.7936e-05	2.34022e-05	3.3817e-05	3.46156e-05	2.49791e-05	2.75999e-05	3.32866e-05	3.60555e-05	2.77927e-05	2.40157e-05	2.89078e-05	2.34261e-05	2.73079e-05	2.9096e-05	2.29078e-05	2.23015e-05	2.65467e-05	2.10023e-05	2.3836e-05	1.74815e-05	2.7272e-05	1.56005	0.64159	1.76196e-08	2.16576	up
meta_239	2-hydroxyhexadecanoic acid	0.000477342	0.000417528	0.000432597	0.000409729	0.000523564	0.000546089	0.000549097	0.000519532	0.000867881	0.000597696	0.000625069	0.000675464	0.000612815	0.000621665	0.000603008	0.000600244	0.000637778	0.000516844	0.000573006	0.000597305	0.000899528	0.00101603	0.00113499	0.000832474	0.000815407	0.00108219	0.00111638	0.00100214	0.000958581	0.0010326	0.000710119	0.000817593	0.000895624	0.000749626	0.000691211	0.000763488	0.000971394	0.000677936	0.000570213	0.000898184	1.57517	0.65551	9.76688e-09	2.10501	up
meta_242	FFA(20:4)	1.24887e-05	8.57252e-06	8.90593e-06	1.14444e-05	1.10684e-05	1.3969e-05	1.07126e-05	1.1381e-05	1.45622e-05	1.52034e-05	1.40341e-05	1.23963e-05	1.40991e-05	1.10127e-05	1.3268e-05	1.05598e-05	1.18491e-05	1.15718e-05	1.27431e-05	1.37116e-05	1.77197e-05	2.84647e-05	2.27567e-05	2.07715e-05	2.641e-05	2.54843e-05	2.3665e-05	1.53943e-05	1.98299e-05	3.02226e-05	1.83961e-05	1.18418e-05	2.38055e-05	2.66273e-05	2.0033e-05	2.11749e-05	2.13412e-05	1.75386e-05	1.21777e-05	2.17487e-05	1.78595	0.836689	5.73566e-08	2.17218	up
meta_243	FFA(15:1)	0.00110855	6.9045e-05	7.49706e-05	7.33587e-05	0.000903321	5.04728e-05	0.00101861	0.00106176	0.000197902	0.000131927	9.22882e-05	4.56652e-05	0.000768982	0.000965566	0.00115569	0.000995965	0.000351138	0.000101337	7.54404e-05	8.91782e-05	8.19911e-05	9.1727e-05	7.52295e-05	6.92439e-05	4.11327e-05	4.79533e-05	4.54483e-05	4.68706e-05	5.14353e-05	6.06307e-05	4.45773e-05	5.25785e-05	0.00109804	5.45132e-05	5.53031e-05	4.56771e-05	4.96023e-05	5.329e-05	0.000466559	0.000114736	0.245919	-2.02375	0.00536954	1.10092	down
meta_252	LPS(16:2/0:0)	5.49089e-07	2.30211e-07	4.32166e-07	3.96826e-07	5.19851e-07	4.99563e-07	4.78118e-07	5.50423e-07	6.21371e-07	3.8157e-07	3.33767e-07	7.38631e-07	5.38838e-07	6.9814e-07	4.51194e-07	5.48939e-07	4.03563e-07	3.63296e-07	5.77858e-07	3.80822e-07	7.83456e-07	7.60188e-07	8.54086e-07	7.81922e-07	8.53252e-07	1.00039e-06	7.27719e-07	7.59419e-07	8.83367e-07	9.15152e-07	1.05954e-06	7.81686e-07	6.64818e-07	8.58347e-07	4.58596e-07	4.34202e-07	6.98923e-07	8.79114e-07	4.84712e-07	7.86343e-07	1.62229	0.698032	2.76018e-07	1.90906	up
meta_253	LPE(0:0/22:4)	3.03111e-05	6.00163e-05	1.20712e-05	3.85943e-05	5.09265e-05	3.77597e-05	2.78253e-05	3.43301e-05	3.91903e-05	5.5272e-05	5.6843e-05	6.81884e-05	3.33597e-05	2.96582e-05	3.20851e-05	1.84233e-05	2.04127e-05	2.32196e-05	3.36191e-05	2.9413e-05	3.98176e-05	0.000133235	9.44457e-05	4.09293e-05	6.24148e-05	6.03924e-05	8.47108e-05	3.69328e-05	7.08383e-05	8.59664e-05	4.12878e-05	3.80239e-05	4.51676e-05	0.000107745	0.00014722	5.9041e-05	2.19634e-05	9.95881e-05	3.65759e-05	7.054e-05	1.92859	0.947547	0.000985306	1.50632	up
meta_254	LPE(22:4/0:0)	3.03111e-05	6.00163e-05	1.20712e-05	3.85943e-05	5.09265e-05	3.77597e-05	2.78253e-05	3.43301e-05	3.91903e-05	5.5272e-05	5.6843e-05	6.81884e-05	3.33597e-05	2.96582e-05	3.20851e-05	1.84233e-05	2.04127e-05	2.32196e-05	3.36191e-05	2.9413e-05	3.98176e-05	0.000133235	9.44457e-05	4.09293e-05	6.24148e-05	6.03924e-05	8.47108e-05	3.69328e-05	7.08383e-05	8.59664e-05	4.12878e-05	3.80239e-05	4.51676e-05	0.000107745	0.00014722	5.9041e-05	2.19634e-05	9.95881e-05	3.65759e-05	7.054e-05	1.92859	0.947547	0.000985306	1.50632	up
meta_255	LPE(0:0/22:5)	4.21034e-05	0.000114745	2.18603e-05	0.00014942	8.39479e-05	5.93969e-05	8.36842e-05	8.83681e-05	8.74386e-05	7.71153e-05	0.000114778	0.000142052	3.97271e-05	4.96836e-05	7.01835e-05	3.86868e-05	2.8064e-05	3.28191e-05	7.69264e-05	9.77203e-05	0.000145556	0.000246981	0.000103787	8.12871e-05	0.000118665	0.000165045	0.000143298	6.99766e-05	0.00010915	0.000169076	9.45275e-05	3.96217e-05	7.56896e-05	0.000156216	0.000228258	0.000182653	1.73417e-05	0.000170368	7.4936e-05	0.00012875	1.71813	0.780841	0.00315345	1.29611	up
meta_256	LPE(22:5/0:0)	4.21034e-05	0.000114745	2.18603e-05	0.00014942	8.39479e-05	5.93969e-05	8.36842e-05	8.83681e-05	8.74386e-05	7.71153e-05	0.000114778	0.000142052	3.97271e-05	4.96836e-05	7.01835e-05	3.86868e-05	2.8064e-05	3.28191e-05	7.69264e-05	9.77203e-05	0.000145556	0.000246981	0.000103787	8.12871e-05	0.000118665	0.000165045	0.000143298	6.99766e-05	0.00010915	0.000169076	9.45275e-05	3.96217e-05	7.56896e-05	0.000156216	0.000228258	0.000182653	1.73417e-05	0.000170368	7.4936e-05	0.00012875	1.71813	0.780841	0.00315345	1.29611	up
meta_257	LPE(0:0/22:6)	0.00112243	0.00104122	0.000970837	0.00132982	0.00127974	0.000948282	0.000737084	0.000926526	0.00129718	0.00108755	0.00122887	0.00206626	0.000874043	0.000784085	0.00127412	0.00141324	0.000814347	0.000996579	0.00149815	0.000997209	0.00190279	0.00298724	0.00162684	0.00142961	0.00142422	0.00229699	0.00178025	0.00182325	0.00122088	0.00268085	0.00141663	0.00111871	0.00105634	0.00127312	0.00153464	0.00324811	0.00086347	0.00175961	0.00113438	0.00174686	1.53993	0.622866	0.00156696	1.40545	up
meta_258	LPE(22:6/0:0)	0.00112243	0.00104122	0.000970837	0.00132982	0.00127974	0.000948282	0.000737084	0.000926526	0.00129718	0.00108755	0.00122887	0.00206626	0.000874043	0.000784085	0.00127412	0.00141324	0.000814347	0.000996579	0.00149815	0.000997209	0.00190279	0.00298724	0.00162684	0.00142961	0.00142422	0.00229699	0.00178025	0.00182325	0.00122088	0.00268085	0.00141663	0.00111871	0.00105634	0.00127312	0.00153464	0.00324811	0.00086347	0.00175961	0.00113438	0.00174686	1.53993	0.622866	0.00156696	1.40545	up
meta_261	LPE(0:0/20:3)	0.000662594	0.000787623	0.000374169	0.00066936	0.000971572	0.000816579	0.000601298	0.000476834	0.000632551	0.000835366	0.000840234	0.0016014	0.000459849	0.000496349	0.000569236	0.000560826	0.000446356	0.000353385	0.00119392	0.000397609	0.000800744	0.00198184	0.000994058	0.000511339	0.000615585	0.000912849	0.00157492	0.0019319	0.000966374	0.00156433	0.000869868	0.0014475	0.000518298	0.000798217	0.00186438	0.00177374	0.000610289	0.00189955	0.000687355	0.00120199	1.74871	0.806294	0.00145406	1.40733	up
meta_262	LPE(20:3/0:0)	0.000662594	0.000787623	0.000374169	0.00066936	0.000971572	0.000816579	0.000601298	0.000476834	0.000632551	0.000835366	0.000840234	0.0016014	0.000459849	0.000496349	0.000569236	0.000560826	0.000446356	0.000353385	0.00119392	0.000397609	0.000800744	0.00198184	0.000994058	0.000511339	0.000615585	0.000912849	0.00157492	0.0019319	0.000966374	0.00156433	0.000869868	0.0014475	0.000518298	0.000798217	0.00186438	0.00177374	0.000610289	0.00189955	0.000687355	0.00120199	1.74871	0.806294	0.00145406	1.40733	up
meta_263	LPE(20:4/0:0)	0.00121719	0.00101712	0.000613027	0.00102317	0.00110935	0.000960756	0.000664329	0.000881241	0.0010599	0.00114932	0.00114568	0.00142113	0.000907319	0.000885788	0.000981547	0.000930292	0.000814273	0.000706483	0.000898901	0.000930159	0.00134961	0.00183248	0.00139039	0.00125508	0.000968131	0.00154578	0.00137276	0.00107319	0.000962383	0.00165435	0.00101824	0.000934431	0.000829317	0.00114914	0.0011691	0.00125216	0.000768878	0.00122662	0.000965849	0.00120845	1.25118	0.323284	0.00486432	1.22083	up
meta_266	LPE(0:0/18:0)	0.00109762	0.000657741	0.000661417	0.00128997	0.0010581	0.0010981	0.00114419	0.000754398	0.00127671	0.0011671	0.00110369	0.0011244	0.000832612	0.00087886	0.00117869	0.000851151	0.00115375	0.000643831	0.00204198	0.000601052	0.00139128	0.00190587	0.0018584	0.00116977	0.002056	0.00232821	0.00238508	0.00180788	0.00114997	0.00231895	0.00143503	0.00139415	0.00189451	0.0015979	0.00176136	0.00195611	0.00122165	0.00170164	0.00103077	0.00174076	1.6888	0.756001	8.56846e-07	1.91806	up
meta_270	LPE(0:0/16:0)	0.00519456	0.00391823	0.00311696	0.00652053	0.00527919	0.00489939	0.00407853	0.00386984	0.00680869	0.00561637	0.00505049	0.00685021	0.00380596	0.00392743	0.00548483	0.00431033	0.0052006	0.00283039	0.0102312	0.00390099	0.00779329	0.0107465	0.0105107	0.00628819	0.00957522	0.0112018	0.0134301	0.00994083	0.00741159	0.0122842	0.0061437	0.00779065	0.00771635	0.00863497	0.0117	0.0120333	0.00612606	0.0113291	0.00504473	0.00948091	1.87937	0.910248	1.67471e-07	2.01756	up
meta_271	LPE(0:0/16:1)	8.56936e-05	7.72051e-05	4.05755e-05	5.14153e-05	0.00012538	7.68684e-05	2.89404e-05	5.67802e-05	4.5942e-05	7.51363e-05	0.000111742	0.000223677	4.57467e-05	6.54338e-05	9.78632e-05	5.76631e-05	4.86046e-05	3.11967e-05	0.000119876	4.29995e-05	9.77028e-05	0.000223982	0.000133346	6.79343e-05	6.25848e-05	0.00010172	0.000182941	0.000285161	8.90515e-05	0.000154909	5.94709e-05	0.000203821	8.1797e-05	8.42944e-05	0.000359309	0.000110967	4.34912e-05	0.000285232	7.54369e-05	0.000145984	1.93518	0.95247	0.00682887	1.2566	up
meta_272	Glycine linoleate	5.01554e-06	5.83926e-06	6.37593e-06	1.51493e-05	5.63592e-06	4.80399e-06	6.23526e-06	7.83083e-06	5.56191e-06	4.90692e-06	1.21006e-05	6.00876e-06	5.99297e-06	6.91106e-06	5.5071e-06	7.10168e-06	8.42787e-06	7.66448e-06	6.76315e-06	5.69574e-06	1.06977e-05	1.71208e-05	9.71777e-06	1.15291e-05	1.02585e-05	1.76947e-05	1.67806e-05	1.23321e-05	1.69982e-05	7.20777e-06	1.03731e-05	8.87581e-06	7.71496e-06	7.57977e-06	7.32445e-06	6.70236e-06	1.47919e-05	7.35509e-06	6.97642e-06	1.11697e-05	1.60106	0.679032	0.000537446	1.44174	up
meta_279	2-Methyl-4-pentenoic Acid	0.000143811	0.000154974	0.000166897	0.000164775	0.000166641	0.000178003	0.000176196	0.000183023	0.000138185	0.000171811	0.000165823	0.000137347	0.000196385	0.000185014	0.000172757	0.000170677	0.000175304	0.000179379	0.000153936	0.000199465	0.000117704	0.000118347	0.000120281	0.000139283	0.000109911	0.000101404	0.000100035	0.000117633	0.000112235	9.86308e-05	0.00011024	0.000127601	0.000123279	0.000115174	0.000140755	0.000136819	0.000124649	0.000160486	0.00016902	0.000120804	0.71473	-0.484529	8.83189e-11	2.17465	down
meta_286	Tridecanedioic acid	7.93061e-05	7.82002e-05	8.92333e-05	0.000104076	9.14042e-05	9.3671e-05	9.71405e-05	0.000102974	7.14289e-05	7.87044e-05	9.61376e-05	8.99536e-05	9.71373e-05	9.84445e-05	0.000105344	0.000102924	0.000100383	0.000108764	9.81691e-05	0.000112216	0.000103573	9.99511e-05	0.000102996	0.000120145	9.51758e-05	9.75178e-05	8.73733e-05	0.000112421	0.000109065	9.57596e-05	0.000111664	0.000194965	0.000117831	0.000114011	0.000131	0.000122805	0.000128424	0.000129152	9.47806e-05	0.000115213	1.21557	0.281637	0.00269685	1.32678	up
meta_287	12-Hydroxyoctadecanoic acid	4.18508e-06	5.73023e-06	7.87285e-06	4.79675e-06	4.86429e-06	3.55075e-06	3.8069e-06	2.72962e-06	6.58121e-06	2.80178e-06	3.87028e-06	3.9609e-06	4.96399e-06	5.06884e-06	5.75885e-06	3.39642e-06	2.57346e-06	4.73862e-06	4.41655e-06	7.24158e-06	6.94196e-06	3.85151e-05	1.43506e-05	8.24108e-06	1.47828e-05	1.42607e-05	1.26304e-05	8.16435e-06	9.2535e-06	5.02156e-06	5.78249e-06	1.73196e-05	1.15858e-05	6.84815e-06	1.0372e-05	7.93893e-06	1.47349e-05	1.68721e-05	4.64545e-06	1.24231e-05	2.67426	1.41914	0.000433945	1.65851	up
meta_288	N-Palmitoylglycine	6.17878e-06	6.22099e-06	8.27615e-06	1.13001e-05	9.11053e-06	7.24628e-06	1.0103e-05	8.9784e-06	1.23274e-05	8.24614e-06	1.1235e-05	8.61755e-06	1.00361e-05	1.08563e-05	9.87376e-06	1.06858e-05	9.69328e-06	9.86911e-06	1.07222e-05	9.40393e-06	1.38453e-05	2.6987e-05	1.74921e-05	1.80908e-05	1.28848e-05	1.93231e-05	3.15055e-05	2.09581e-05	1.80528e-05	1.35772e-05	1.90729e-05	1.29443e-05	1.08037e-05	8.23402e-06	1.3991e-05	8.79286e-06	1.6321e-05	1.29203e-05	9.44903e-06	1.64332e-05	1.73914	0.798371	0.000108506	1.70795	up
meta_290	12-HHT	3.7336e-06	2.34762e-06	7.66748e-07	2.40942e-06	4.76271e-06	2.87748e-06	2.75706e-06	1.68114e-06	2.6531e-06	3.45025e-06	2.75088e-06	1.18182e-06	3.48869e-06	2.76196e-06	1.70106e-06	1.72158e-06	3.54226e-06	1.50973e-06	1.11292e-06	1.44189e-06	2.47065e-06	7.70326e-06	4.29224e-06	5.79948e-06	5.53723e-06	2.18549e-06	1.62337e-06	3.22236e-06	3.11065e-06	2.27543e-06	2.26031e-06	2.81439e-06	1.2733e-05	4.81729e-06	9.53744e-06	3.96346e-06	5.39924e-06	1.18816e-06	2.4326e-06	4.4963e-06	1.84836	0.886242	0.0114221	1.22712	up
meta_294	8(S)-HETrE	2.05502e-06	2.41101e-06	6.84764e-07	1.65534e-06	2.23488e-06	2.17148e-06	3.02083e-06	6.38391e-07	3.13495e-06	1.16381e-06	1.75537e-06	1.35211e-06	1.74128e-06	2.23746e-06	2.22361e-06	1.99181e-06	3.403e-06	1.15459e-06	6.93796e-07	1.22962e-06	1.0178e-06	4.30806e-06	7.13298e-06	3.2041e-06	3.42589e-06	1.08503e-06	2.51091e-06	1.91123e-06	2.37656e-06	1.36791e-06	1.73626e-06	1.89057e-06	4.55799e-06	2.41484e-06	4.10442e-06	2.17017e-06	2.7905e-06	3.27981e-06	1.84766e-06	2.84917e-06	1.54204	0.624844	0.0181491	1.10297	up
meta_295	15(S)-HETrE	2.05502e-06	2.41101e-06	6.84764e-07	1.65534e-06	2.23488e-06	2.17148e-06	3.02083e-06	6.38391e-07	3.13495e-06	1.16381e-06	1.75537e-06	1.35211e-06	1.74128e-06	2.23746e-06	2.22361e-06	1.99181e-06	3.403e-06	1.15459e-06	6.93796e-07	1.22962e-06	1.0178e-06	4.30806e-06	7.13298e-06	3.2041e-06	3.42589e-06	1.08503e-06	2.51091e-06	1.91123e-06	2.37656e-06	1.36791e-06	1.73626e-06	1.89057e-06	4.55799e-06	2.41484e-06	4.10442e-06	2.17017e-06	2.7905e-06	3.27981e-06	1.84766e-06	2.84917e-06	1.54204	0.624844	0.0181491	1.10297	up
meta_298	(±)8(9)-DiHET	9.16037e-07	8.58504e-07	1.20262e-06	8.27684e-07	7.36867e-07	6.74927e-07	1.1117e-06	1.44706e-06	1.03895e-06	1.12041e-06	1.04802e-06	8.87301e-07	9.92505e-07	7.79122e-07	8.94802e-07	7.61096e-07	8.68772e-07	1.02393e-06	6.81533e-07	1.22383e-06	1.42024e-06	1.56358e-06	1.93481e-06	1.32238e-06	1.65249e-06	1.89091e-06	1.79801e-06	1.27632e-06	2.53507e-06	1.69718e-06	1.36912e-06	1.18521e-06	1.38388e-06	1.66745e-06	1.14961e-06	1.48937e-06	1.16407e-06	1.57945e-06	9.54784e-07	1.55995e-06	1.63383	0.708256	5.0859e-07	1.95344	up
meta_299	(±)11(12)-DiHET	9.16037e-07	8.58504e-07	1.20262e-06	8.27684e-07	7.36867e-07	6.74927e-07	1.1117e-06	1.44706e-06	1.03895e-06	1.12041e-06	1.04802e-06	8.87301e-07	9.92505e-07	7.79122e-07	8.94802e-07	7.61096e-07	8.68772e-07	1.02393e-06	6.81533e-07	1.22383e-06	1.42024e-06	1.56358e-06	1.93481e-06	1.32238e-06	1.65249e-06	1.89091e-06	1.79801e-06	1.27632e-06	2.53507e-06	1.69718e-06	1.36912e-06	1.18521e-06	1.38388e-06	1.66745e-06	1.14961e-06	1.48937e-06	1.16407e-06	1.57945e-06	9.54784e-07	1.55995e-06	1.63383	0.708256	5.0859e-07	1.95344	up
meta_304	20-HDoHE	2.7038e-07	3.62557e-07	9.75373e-08	2.5669e-07	4.17669e-07	3.04414e-07	6.88435e-07	2.85004e-07	7.06622e-07	1.86299e-07	2.03627e-07	3.5411e-07	4.15086e-07	7.20871e-07	6.36971e-07	7.74158e-07	5.61883e-07	4.44494e-07	3.03083e-07	4.27717e-07	4.35386e-07	9.97547e-07	1.32576e-06	7.07899e-07	9.29122e-07	3.54865e-07	7.10314e-07	5.50752e-07	6.15827e-07	3.66773e-07	4.95166e-07	1.44176e-07	1.15311e-06	4.3007e-07	1.17718e-06	8.35983e-07	5.48344e-07	8.92917e-07	4.2088e-07	7.03955e-07	1.67258	0.742073	0.0034695	1.3201	up
meta_305	11-HEDE	1.84439e-06	1.71067e-06	5.11279e-07	1.38008e-06	2.21398e-06	1.31418e-06	2.06823e-06	8.73595e-07	2.32799e-06	1.30535e-06	1.92291e-06	7.42718e-07	2.26885e-06	1.77538e-06	1.40499e-06	1.22188e-06	2.44935e-06	9.16034e-07	8.92801e-07	6.65956e-07	1.27899e-06	5.75455e-06	3.37244e-06	3.33985e-06	3.67551e-06	1.78334e-06	1.13737e-06	1.76681e-06	2.36166e-06	1.49905e-06	2.75412e-06	1.63636e-06	7.43771e-06	1.95589e-06	5.78904e-06	2.67602e-06	2.83194e-06	8.57331e-07	1.49053e-06	2.88378e-06	1.93473	0.952133	0.00527816	1.34963	up
meta_306	15-HEDE	1.84439e-06	1.71067e-06	5.11279e-07	1.38008e-06	2.21398e-06	1.31418e-06	2.06823e-06	8.73595e-07	2.32799e-06	1.30535e-06	1.92291e-06	7.42718e-07	2.26885e-06	1.77538e-06	1.40499e-06	1.22188e-06	2.44935e-06	9.16034e-07	8.92801e-07	6.65956e-07	1.27899e-06	5.75455e-06	3.37244e-06	3.33985e-06	3.67551e-06	1.78334e-06	1.13737e-06	1.76681e-06	2.36166e-06	1.49905e-06	2.75412e-06	1.63636e-06	7.43771e-06	1.95589e-06	5.78904e-06	2.67602e-06	2.83194e-06	8.57331e-07	1.49053e-06	2.88378e-06	1.93473	0.952133	0.00527816	1.34963	up
meta_309	Sorbitol 6-phosphate	1.09203e-05	8.80727e-06	8.43571e-06	8.2065e-06	9.11697e-06	1.1028e-05	8.86219e-06	5.94929e-06	8.49179e-06	6.87136e-06	1.02889e-05	8.7241e-06	7.73702e-06	1.21821e-05	1.11908e-05	1.54829e-05	1.03212e-05	1.17729e-05	5.08137e-06	1.24192e-05	4.90822e-06	9.81642e-06	1.38444e-05	6.27547e-06	5.77484e-06	5.12947e-06	8.35289e-06	6.87416e-06	8.19747e-06	8.24802e-06	7.61957e-06	7.55796e-06	8.91148e-06	8.39262e-06	7.43775e-06	5.23782e-06	8.54388e-06	5.41838e-06	9.5945e-06	7.5856e-06	0.79062	-0.338944	0.0103126	1.07323	down
meta_310	Glu-Gln	3.48513e-05	4.92361e-05	5.38805e-05	3.59719e-05	6.64046e-05	5.49758e-05	2.50639e-05	5.15282e-05	2.67212e-05	5.16903e-05	3.98432e-05	5.25609e-05	3.01461e-05	3.56492e-05	5.28727e-05	3.90874e-05	2.64317e-05	5.6538e-05	2.67428e-05	6.93324e-05	5.9372e-05	3.56383e-05	1.39832e-05	4.45299e-05	2.81533e-05	2.45232e-05	9.50304e-06	2.00518e-05	1.42157e-05	2.47551e-05	1.50259e-05	3.47867e-05	9.25278e-06	1.18782e-05	2.35555e-05	2.9989e-05	2.1504e-05	2.47578e-05	4.39764e-05	2.47486e-05	0.562771	-0.829381	7.72826e-05	1.59593	down
meta_311	N-Arachidonoyl-L-Alanine	1.87969e-07	4.10003e-07	3.2856e-07	3.82908e-07	3.01817e-07	3.72248e-07	3.85406e-07	3.00486e-07	3.05513e-07	2.96339e-07	5.91115e-07	4.06227e-07	2.00418e-07	2.40006e-07	3.5455e-07	2.3368e-07	2.16671e-07	1.897e-07	2.77813e-07	2.77557e-07	6.06788e-07	7.40208e-07	6.76774e-07	5.21892e-07	6.29235e-07	4.99357e-07	7.02752e-07	4.20328e-07	6.57027e-07	5.06256e-07	5.72073e-07	6.27206e-07	6.7725e-07	4.97565e-07	4.03483e-07	3.28507e-07	4.08607e-07	3.86741e-07	3.12949e-07	5.47892e-07	1.75074	0.807962	2.83288e-07	1.94114	up
meta_313	Glycerophospho-N-Arachidonoyl Ethanolamine	0.00124384	0.00101678	0.000639512	0.00104317	0.0011551	0.00098658	0.000670545	0.000931907	0.00110033	0.00121359	0.00120098	0.00145323	0.000921276	0.000887675	0.00101897	0.000990683	0.000876448	0.000731692	0.000921435	0.000889008	0.00141641	0.00194073	0.00147053	0.00133113	0.0010242	0.0015814	0.00144968	0.00109388	0.000968888	0.00171069	0.00107888	0.0009664	0.000847196	0.00117856	0.00126027	0.00132751	0.000827752	0.00127901	0.000994638	0.00126406	1.27088	0.345824	0.0031527	1.27728	up
meta_326	D-Galacturonic Acid	5.16853e-06	8.52179e-06	6.44672e-06	6.26275e-06	9.09767e-06	7.47954e-06	1.59514e-06	8.90724e-06	4.25419e-06	6.6052e-06	3.44576e-06	1.03217e-05	7.34376e-06	4.95953e-06	5.37924e-06	6.73856e-06	5.59148e-06	6.22978e-06	6.58746e-06	5.15482e-06	8.69911e-06	9.4481e-06	4.98248e-06	6.93122e-06	1.04658e-05	9.95488e-06	1.29609e-05	9.92996e-06	9.35126e-06	9.90248e-06	5.16088e-06	9.24375e-06	8.91488e-06	6.76103e-06	7.52672e-06	1.38247e-05	8.58956e-06	1.95088e-05	6.30454e-06	9.56425e-06	1.51704	0.60126	0.00133483	1.39817	up
meta_327	D-Tagatose	6.25546e-06	6.4367e-06	1.38632e-05	1.03347e-05	9.32401e-06	8.50954e-06	7.20271e-06	1.20775e-05	8.54024e-06	1.02797e-05	8.20535e-06	8.27368e-06	1.26057e-05	7.78254e-06	7.56111e-06	1.00102e-05	7.05732e-06	6.0217e-06	1.19639e-05	8.23989e-06	1.55689e-05	1.04923e-05	3.96142e-06	1.25669e-05	9.81934e-06	1.25536e-05	1.1953e-05	1.35088e-05	1.44367e-05	1.16153e-05	1.3298e-05	1.39833e-05	7.24896e-06	1.14333e-05	1.06557e-05	9.75718e-06	1.40134e-05	1.43095e-05	9.02725e-06	1.1732e-05	1.29962	0.378087	0.00278026	1.24274	up
meta_332	Pro-Gly	7.60647e-06	5.70571e-06	1.0286e-05	7.39753e-06	5.03824e-06	7.71309e-06	9.3676e-06	7.78614e-06	7.69766e-06	8.80369e-06	5.13912e-06	8.35999e-06	8.8569e-06	1.323e-05	1.07475e-05	1.19394e-05	1.206e-05	1.20214e-05	8.3112e-06	8.38449e-06	9.55004e-06	5.86133e-06	4.66367e-06	9.40015e-06	4.47051e-06	5.29047e-06	4.06667e-06	6.43332e-06	5.03314e-06	7.46591e-06	6.75346e-06	3.66727e-06	8.06459e-06	6.00136e-06	8.65032e-06	5.67133e-06	8.64609e-06	7.9575e-06	8.82261e-06	6.53595e-06	0.740819	-0.432808	0.0017973	1.30332	down
meta_337	Xanthosine-5'-monophosphate	1.37463e-06	2.32376e-06	2.11882e-06	1.91732e-06	1.11223e-06	1.87317e-06	1.17012e-06	1.47339e-06	7.26838e-07	1.69437e-06	9.73279e-07	1.29791e-06	1.12732e-06	1.90403e-06	1.09911e-06	1.88325e-06	2.5417e-06	1.10622e-06	2.95256e-06	2.96606e-06	7.31868e-07	9.91841e-07	7.77223e-07	1.16627e-06	9.67108e-07	8.01424e-07	1.43897e-06	1.37804e-06	5.21843e-07	1.04086e-06	8.8982e-07	1.47372e-06	5.9164e-07	1.25856e-06	8.18634e-07	1.23896e-06	1.67592e-06	1.17248e-06	1.6818e-06	1.05195e-06	0.625492	-0.676937	0.00063655	1.36487	down
meta_338	Phosphatidylethanolamine lyso alkenyl 16:0	2.0356e-05	1.92012e-05	1.2693e-05	2.32919e-05	1.65931e-05	1.63129e-05	1.74201e-05	1.9902e-05	3.2797e-05	2.0126e-05	1.79064e-05	1.86291e-05	2.10064e-05	1.83141e-05	1.95677e-05	2.20415e-05	2.23524e-05	1.55429e-05	3.52147e-05	2.03905e-05	3.05874e-05	2.55082e-05	4.2569e-05	2.53851e-05	3.1681e-05	5.25138e-05	3.20018e-05	3.05991e-05	3.09751e-05	4.33852e-05	3.76756e-05	2.784e-05	3.61666e-05	3.82731e-05	3.09867e-05	3.16904e-05	3.50898e-05	3.2249e-05	2.04829e-05	3.41765e-05	1.66853	0.738582	8.55317e-08	2.00462	up
meta_339	LPA(16:0/0:0)	0.000245889	0.000253738	0.000217458	0.000251378	0.000295706	0.000245118	0.000286158	0.000243556	0.000344686	0.000301195	0.000277804	0.000274213	0.000315154	0.000246568	0.000236171	0.000259717	0.000247185	0.000199489	0.000621516	0.000299924	0.000384195	0.000471307	0.00065174	0.000340888	0.000809834	0.000939844	0.000924384	0.000626703	0.000603436	0.000814071	0.000634082	0.000483095	0.000736723	0.000729157	0.000710918	0.00090747	0.000591913	0.000566621	0.000283131	0.000662577	2.34018	1.22662	1.73644e-08	2.18406	up
meta_341	3-hydroxy-tetradecanoic acid	2.44188e-05	1.4128e-05	2.84601e-05	1.5274e-05	1.57234e-05	1.3082e-05	1.81305e-05	1.15541e-05	7.46873e-05	1.21963e-05	2.44323e-05	1.68091e-05	2.45781e-05	1.43296e-05	2.21453e-05	3.03054e-05	1.80392e-05	3.03786e-05	1.68871e-05	3.08028e-05	2.5516e-05	6.76106e-05	2.59074e-05	2.71581e-05	3.37784e-05	5.39248e-05	2.61417e-05	3.73581e-05	3.11822e-05	4.83877e-05	4.29275e-05	4.80356e-05	6.54114e-05	3.50325e-05	4.0628e-05	3.56895e-05	3.51004e-05	0.000101784	2.28181e-05	4.34208e-05	1.90291	0.928208	0.000734111	1.46068	up
meta_342	Glu-Val	4.87576e-05	4.6363e-05	3.82943e-05	3.9337e-05	6.26135e-05	3.79375e-05	7.02439e-05	3.80617e-05	4.52625e-05	7.37926e-05	5.52392e-05	5.62169e-05	3.18106e-05	3.83943e-05	4.27996e-05	4.30641e-05	3.94784e-05	6.01441e-05	4.99403e-05	4.48103e-05	5.87992e-05	7.08666e-05	6.59404e-05	4.58504e-05	7.24737e-05	4.39353e-05	7.22203e-05	6.67448e-05	0.000100864	6.15985e-05	4.87113e-05	7.44188e-05	7.20307e-05	5.81605e-05	6.50211e-05	0.00012596	7.78503e-05	5.80833e-05	4.81281e-05	6.88627e-05	1.43082	0.516845	0.000503011	1.46003	up
meta_345	LPA(18:1/0:0)	1.02803e-05	1.0415e-05	7.51877e-06	1.02985e-05	9.96699e-06	7.09599e-06	8.4265e-06	9.70135e-06	1.18837e-05	8.13026e-06	7.21863e-06	7.71375e-06	9.80039e-06	7.98777e-06	6.1304e-06	7.76117e-06	7.75451e-06	7.79424e-06	1.48403e-05	5.94103e-06	1.22762e-05	1.20841e-05	1.66674e-05	1.14167e-05	1.29014e-05	1.46655e-05	1.40875e-05	1.65139e-05	1.43571e-05	1.50649e-05	1.66076e-05	1.4205e-05	1.51425e-05	1.64471e-05	1.36359e-05	8.9036e-06	1.29599e-05	1.49288e-05	8.83298e-06	1.40481e-05	1.59041	0.6694	3.98572e-09	2.09749	up
meta_346	D-Allose	6.25546e-06	6.4367e-06	1.38632e-05	1.03347e-05	9.32401e-06	8.50954e-06	7.20271e-06	1.20775e-05	8.54024e-06	1.02797e-05	8.20535e-06	8.27368e-06	1.26057e-05	7.78254e-06	7.56111e-06	1.00102e-05	7.05732e-06	6.0217e-06	1.19639e-05	8.23989e-06	1.55689e-05	1.04923e-05	3.96142e-06	1.25669e-05	9.81934e-06	1.25536e-05	1.1953e-05	1.35088e-05	1.44367e-05	1.16153e-05	1.3298e-05	1.39833e-05	7.24896e-06	1.14333e-05	1.06557e-05	9.75718e-06	1.40134e-05	1.43095e-05	9.02725e-06	1.1732e-05	1.29962	0.378087	0.00278026	1.24274	up
meta_349	N-Acetyglutamic acid	0.000296928	0.000424218	0.000199256	0.000220504	0.000336365	0.000323775	0.000366075	0.000221325	0.000339017	0.000270438	0.000409362	0.000253421	0.000185117	0.000359933	0.000305781	0.000408827	0.000457165	0.000380689	0.000218187	0.000349658	0.000302052	0.000288759	0.000660932	0.00031158	0.000541607	0.000354795	0.000388003	0.000341581	0.000379876	0.000459082	0.00036564	0.00041132	0.000464612	0.000540716	0.000351075	0.000301006	0.000463005	0.000348615	0.000316302	0.000404125	1.27766	0.3535	0.00585833	1.17661	up
meta_353	Leu-Ile	7.12503e-06	6.38153e-06	7.0484e-06	3.57171e-06	7.82082e-06	7.04251e-06	9.4462e-06	1.00589e-05	6.04255e-06	9.11936e-06	7.0873e-06	7.49262e-06	2.28229e-06	9.00038e-06	1.27214e-05	5.07692e-06	3.19668e-06	1.51729e-05	2.41352e-06	8.8168e-06	2.39617e-06	1.38083e-05	5.2264e-06	2.48971e-06	2.90352e-06	2.43427e-06	2.14988e-06	4.47571e-06	2.24722e-06	3.62673e-06	4.48811e-06	4.01421e-06	1.35828e-06	2.79461e-06	1.28345e-06	2.58028e-06	6.41202e-06	2.12606e-06	7.34589e-06	3.71194e-06	0.505308	-0.984764	0.000777426	1.37728	down
meta_356	Phosphatidylethanolamine lyso alkenyl 18:2	4.87017e-05	4.08412e-05	1.57662e-05	4.68914e-05	5.33346e-05	4.8356e-05	2.40406e-05	2.78961e-05	5.58323e-05	4.67151e-05	5.90372e-05	6.6608e-05	4.82866e-05	2.34266e-05	2.68962e-05	2.98888e-05	6.06485e-05	3.56542e-05	5.73208e-05	2.8794e-05	5.24129e-05	5.99731e-05	9.01307e-05	6.46029e-05	6.66671e-05	0.000173801	6.45233e-05	4.33897e-05	6.90195e-05	5.74881e-05	6.88731e-05	7.01459e-05	4.34025e-05	8.89597e-05	4.57504e-05	0.000103829	4.76059e-05	4.30383e-05	4.22468e-05	6.96452e-05	1.64853	0.721181	0.00238989	1.34012	up
meta_357	2-Octanamidoacetic acid	2.71307e-06	2.69049e-06	2.96929e-06	2.83389e-06	2.59403e-06	2.54572e-06	3.06901e-06	3.08646e-06	2.535e-06	2.59214e-06	2.51984e-06	2.51717e-06	2.33505e-06	3.24276e-06	2.63866e-06	2.65566e-06	2.47405e-06	2.58437e-06	2.64996e-06	2.88138e-06	3.30597e-06	3.26989e-06	2.61547e-06	3.22105e-06	3.63308e-06	3.61353e-06	3.74561e-06	3.70441e-06	3.04042e-06	2.37289e-06	2.63716e-06	2.26255e-06	2.38812e-06	3.2946e-06	3.26218e-06	2.78149e-06	2.88596e-06	3.01806e-06	2.7064e-06	3.05847e-06	1.13009	0.176434	0.00856116	1.14004	up
meta_364	L-Histidine	0.00286111	0.00258876	0.0021673	0.00211451	0.00258693	0.00214975	0.00247742	0.00214311	0.00191142	0.00235174	0.00239837	0.0017629	0.00216465	0.00222345	0.00220398	0.00323459	0.00215789	0.00291827	0.00202547	0.00213842	0.00209683	0.00213844	0.00207234	0.00177764	0.00233182	0.00165323	0.00194454	0.00172334	0.00159359	0.00184641	0.00178692	0.00182913	0.00213331	0.00188622	0.00285946	0.00183493	0.00177309	0.00180251	0.002329	0.0019491	0.836881	-0.256905	0.00105671	1.29732	down
meta_366	L-Phenylalanine	0.047135	0.0479997	0.0577381	0.0492252	0.0494483	0.0553525	0.0561704	0.052384	0.0484034	0.0488034	0.0483242	0.0427945	0.0573854	0.0536466	0.0535654	0.0532437	0.0558427	0.0510059	0.045044	0.0616288	0.0495492	0.0441938	0.0408775	0.0486624	0.0438781	0.0415736	0.0431139	0.0445796	0.0494561	0.0401544	0.0429086	0.0445701	0.0483285	0.0460009	0.044006	0.0434286	0.046421	0.0424663	0.0517571	0.044676	0.863187	-0.212255	3.26895e-06	1.77903	down
meta_371	Glyc-Pro	1.51949e-05	1.24838e-05	1.95776e-05	1.62241e-05	1.84063e-05	1.71145e-05	1.62556e-05	1.90478e-05	1.3638e-05	1.79797e-05	1.60878e-05	1.33149e-05	1.29115e-05	1.9896e-05	2.06075e-05	1.73391e-05	1.77672e-05	2.03708e-05	1.53684e-05	1.84031e-05	1.34313e-05	1.34659e-05	1.06694e-05	1.14173e-05	1.46116e-05	1.02985e-05	1.12439e-05	1.46576e-05	1.0537e-05	1.29977e-05	1.59006e-05	1.30859e-05	8.80343e-06	9.89823e-06	1.36541e-05	9.89492e-06	1.24296e-05	1.07719e-05	1.68994e-05	1.20983e-05	0.715898	-0.482174	1.21424e-07	1.94658	down
meta_372	L-Homocystine	1.67172e-06	1.06116e-06	5.06015e-06	2.32051e-06	1.04029e-05	1.95459e-06	2.02922e-06	3.09381e-06	5.15879e-06	3.25316e-06	4.81796e-06	5.17349e-06	6.21715e-06	4.9577e-06	3.96347e-06	2.46684e-06	3.52168e-06	7.11658e-06	1.93825e-06	1.53379e-06	2.6811e-06	1.91458e-06	9.93918e-07	2.6502e-06	1.45745e-06	3.82576e-07	7.86873e-07	1.07703e-06	1.17881e-06	2.84142e-07	1.95543e-06	4.45532e-06	7.68445e-07	2.04482e-06	2.04792e-07	3.71545e-07	2.55763e-06	2.06273e-06	3.88565e-06	1.54597e-06	0.397866	-1.32965	0.000352548	1.41826	down
meta_375	Nα-Acetyl-L-Arginine	2.45369e-05	2.68984e-05	2.86103e-05	3.56547e-05	2.95063e-05	2.65819e-05	3.09012e-05	2.6486e-05	2.68799e-05	2.58809e-05	3.11352e-05	2.89338e-05	2.85984e-05	3.44906e-05	3.25801e-05	2.84389e-05	3.43565e-05	3.71082e-05	2.53338e-05	2.9956e-05	2.92832e-05	2.69883e-05	2.63659e-05	2.50762e-05	3.10163e-05	2.07908e-05	2.32028e-05	2.38547e-05	2.38224e-05	1.90104e-05	2.52183e-05	2.39624e-05	2.15638e-05	2.60834e-05	2.59073e-05	1.97675e-05	2.09374e-05	2.22425e-05	2.96434e-05	2.41719e-05	0.815421	-0.294382	1.73058e-05	1.67548	down
meta_379	Urea	0.00300953	0.00345212	0.0019133	0.0028778	0.00323554	0.0032132	0.00283756	0.00356695	0.00326154	0.00427221	0.00297354	0.0027304	0.00278984	0.00330655	0.00262987	0.00355563	0.00270846	0.00346434	0.00274914	0.00304628	0.00254379	0.00234279	0.00229515	0.00278594	0.00242831	0.00180567	0.00329826	0.00235936	0.00330074	0.0021838	0.00223536	0.00215195	0.000935529	0.0026732	0.00226658	0.00219093	0.0020613	0.00312493	0.00307969	0.00238798	0.775395	-0.366997	0.000254833	1.54022	down
meta_386	2-Hydroxy-6-Aminopurine	6.09841e-06	3.80711e-06	4.95873e-06	1.83912e-06	2.52488e-06	6.07008e-06	4.07081e-06	3.44639e-06	2.19632e-06	2.53885e-06	1.9267e-06	1.68881e-06	2.79408e-06	2.88376e-06	1.57159e-06	9.08784e-06	2.23627e-06	5.13565e-06	6.66825e-07	6.39281e-06	1.49472e-06	5.56592e-06	1.05384e-06	2.52484e-06	4.71233e-07	2.66177e-07	1.77155e-07	1.99524e-07	1.26659e-06	2.58545e-07	1.89784e-07	4.03964e-07	7.59279e-07	1.81197e-07	6.93592e-07	8.53045e-08	9.95237e-08	6.72624e-07	3.59675e-06	9.09101e-07	0.252756	-1.98418	3.88749e-05	1.62098	down
meta_389	Adenosine	1.71908e-05	1.61664e-05	1.79404e-05	1.98386e-05	1.90696e-05	1.3782e-05	1.01663e-05	1.33908e-05	1.13789e-05	6.52803e-06	2.52943e-05	1.07252e-05	1.49503e-05	1.14362e-05	1.45837e-05	1.65061e-05	8.4189e-06	5.5254e-06	9.45759e-06	6.23897e-06	8.47676e-06	1.09109e-05	8.91345e-06	2.13033e-05	6.32648e-07	3.86972e-06	3.39751e-06	3.98995e-06	6.10042e-06	4.26442e-06	4.11227e-06	5.62787e-06	9.19743e-06	7.09796e-06	8.20741e-06	9.69599e-06	8.4953e-06	7.61071e-06	1.34294e-05	7.328e-06	0.545668	-0.873906	0.00035365	1.41852	down
meta_391	Deoxyguanosine	1.71908e-05	1.61664e-05	1.79404e-05	1.98386e-05	1.90696e-05	1.3782e-05	1.01663e-05	1.33908e-05	1.13789e-05	6.52803e-06	2.52943e-05	1.07252e-05	1.49503e-05	1.14362e-05	1.45837e-05	1.65061e-05	8.4189e-06	5.5254e-06	9.45759e-06	6.23897e-06	8.47676e-06	1.09109e-05	8.91345e-06	2.13033e-05	6.32648e-07	3.86972e-06	3.39751e-06	3.98995e-06	6.10042e-06	4.26442e-06	4.11227e-06	5.62787e-06	9.19743e-06	7.09796e-06	8.20741e-06	9.69599e-06	8.4953e-06	7.61071e-06	1.34294e-05	7.328e-06	0.545668	-0.873906	0.00035365	1.41852	down
meta_392	Guanosine	0.000234767	0.000216791	0.000354123	0.000114105	0.000168357	0.000159305	0.000148217	6.21688e-05	0.000102512	0.000141215	8.90266e-05	0.000139125	9.51103e-05	0.000131449	0.000101334	0.000260399	0.000131986	0.000265009	7.74179e-06	0.000141842	5.72225e-05	0.000195103	5.27166e-05	0.000170834	5.48304e-06	3.32554e-06	5.333e-06	7.73849e-06	1.03381e-05	3.11628e-06	8.46048e-06	3.60558e-05	1.83626e-06	6.81385e-06	1.39168e-05	2.08894e-05	1.23543e-05	4.14461e-05	0.000153229	3.62769e-05	0.236749	-2.07857	7.59695e-06	1.72441	down
meta_393	Purine	0.000215659	0.000210127	0.000260852	0.000241741	0.000204633	0.000217036	0.000233826	0.000196006	0.000245372	0.000222426	0.000225191	0.000198847	0.000189282	0.000208536	0.000212797	0.00021577	0.000228053	0.000211221	0.000202912	0.000211267	0.000189379	0.000205891	0.000198135	0.000190409	0.000193547	0.000181052	0.000168511	0.000210986	0.000253166	0.000171069	0.000192077	0.000188418	0.000163024	0.000213723	0.000185163	0.000211258	0.000205429	0.0001784	0.000217578	0.000194424	0.893585	-0.162323	0.000855934	1.41761	down
meta_396	D-Fructose	0.00336604	0.00320081	0.00334166	0.00310617	0.00303841	0.00305783	0.00324049	0.00328539	0.00242186	0.00303205	0.00291099	0.00260644	0.00309951	0.00465944	0.00326445	0.0031211	0.00313801	0.00347648	0.00255039	0.00320276	0.0025762	0.00252394	0.00215131	0.00271281	0.00225781	0.00202727	0.00211483	0.00244589	0.00223977	0.00184629	0.00227065	0.00246563	0.00197306	0.00190355	0.00232433	0.00222068	0.00209189	0.00234159	0.00315601	0.0022493	0.712704	-0.488625	8.6977e-09	2.10039	down
meta_397	D-Gluconic Acid	0.000106626	0.000109796	0.000119246	0.000111479	0.00011138	0.00011309	0.000117805	0.000118943	0.000107856	0.000109698	0.000115519	9.69976e-05	0.000115107	0.000121188	0.000121183	0.000130916	0.000104446	0.000123826	0.000102187	0.000127477	0.000104621	9.02898e-05	9.0791e-05	0.000104292	9.423e-05	8.28245e-05	8.77261e-05	9.97674e-05	0.00010091	9.44082e-05	9.1935e-05	0.000104134	8.73862e-05	9.06865e-05	9.45666e-05	8.87817e-05	9.21073e-05	0.000103689	0.000114238	9.46193e-05	0.828263	-0.27184	2.65989e-09	2.10533	down
meta_398	Nicotinamide	0.000388951	0.000224968	0.00017457	0.000324658	0.000252502	0.000263914	0.000363731	0.000171084	0.000308045	0.000154409	0.000273669	0.000286153	0.000146492	0.000165465	0.000330648	0.000333575	0.00039549	0.00028266	7.55009e-05	0.000212109	0.000112876	0.000246306	0.000301641	0.000223053	3.53888e-05	4.38336e-05	0.000219409	0.000106742	0.000120942	0.000110215	0.000109533	0.000131746	0.000119103	0.000134436	0.000281094	0.000172274	0.00010637	7.96401e-05	0.00025643	0.000147478	0.575121	-0.798063	0.00025465	1.47932	down
meta_402	5-Hydroxytryptophol	8.37447e-05	6.20781e-05	7.74466e-05	5.3764e-05	8.09179e-05	6.72274e-05	8.09024e-05	6.8891e-05	6.29474e-05	6.36291e-05	5.52095e-05	6.36361e-05	6.9635e-05	6.62392e-05	3.78246e-05	5.30043e-05	6.18573e-05	6.73609e-05	5.44712e-05	7.78844e-05	4.94513e-05	4.88833e-05	4.88146e-05	4.95837e-05	5.91172e-05	4.04436e-05	4.54213e-05	4.63048e-05	4.95281e-05	4.45545e-05	4.1739e-05	2.25029e-06	4.16764e-05	4.55701e-05	5.0052e-05	5.2857e-05	4.82692e-05	4.43279e-05	6.54336e-05	4.49358e-05	0.686739	-0.542166	3.35467e-06	1.8099	down
meta_403	4-Guanidinobutyric Acid	0.000306311	0.000423762	0.000696631	0.000413794	0.000436028	0.000459853	0.000351139	0.000475775	0.000411417	0.000388436	0.00038538	0.000284585	0.000507476	0.000437321	0.00036319	0.000284477	0.000391975	0.000454875	0.000289055	0.000521738	0.000427647	0.000259426	0.000126405	0.000459707	0.0002556	0.00016493	0.000196077	0.000199034	0.000339003	0.000184492	0.000180243	0.000342871	0.000316189	0.000237501	0.000211842	0.000220292	0.00025571	0.000276652	0.000414161	0.000258535	0.624237	-0.679835	9.43838e-06	1.72547	down
meta_405	7-Methyluric Acid	9.43868e-05	6.59007e-05	7.48352e-05	6.89675e-05	8.58977e-05	6.08193e-05	8.45678e-05	9.19292e-05	5.75111e-05	6.08259e-05	5.56702e-05	6.06124e-05	6.75042e-05	8.77307e-05	7.40601e-05	7.56829e-05	6.8838e-05	7.76131e-05	6.64203e-05	7.93634e-05	5.68164e-05	5.9454e-05	4.44879e-05	4.5141e-05	5.12286e-05	5.11374e-05	5.96922e-05	6.68667e-05	4.73304e-05	3.92508e-05	5.33115e-05	5.69544e-05	6.8078e-05	4.59323e-05	5.81193e-05	4.72885e-05	5.36667e-05	5.63864e-05	7.29568e-05	5.33968e-05	0.731896	-0.45029	5.58747e-07	1.85737	down
meta_413	LPC(0:0/14:0)	0.00172339	0.00179779	0.00151327	0.00163935	0.00220071	0.00208286	0.00193242	0.00222721	0.00164833	0.00186893	0.00193778	0.00302809	0.00176364	0.00235302	0.00310862	0.00178877	0.00140826	0.000878394	0.0058808	0.00168499	0.00174736	0.00392649	0.00345619	0.00185037	0.00237323	0.00246411	0.00453319	0.00328888	0.00244994	0.00679937	0.00373769	0.00291326	0.0028956	0.00284599	0.00460092	0.00479856	0.00243266	0.00377343	0.00212333	0.00338262	1.59307	0.671814	0.00185504	1.36106	up
meta_417	Taurocholic Acid Sodium Salt Hydrate	0.000859932	0.000939558	0.00095552	0.000871405	0.000798753	0.000839623	0.000934271	0.000863935	0.000751754	0.000760145	0.00074694	0.000643695	0.000760856	0.000885788	0.000826892	0.000872544	0.0007937	0.000806136	0.000643572	0.000841651	0.000613032	0.0005913	0.000551698	0.000668256	0.000606778	0.0005287	0.000515719	0.000609332	0.000552219	0.000485767	0.000605535	0.000579261	0.000556249	0.000561606	0.000618304	0.000591982	0.000599512	0.000627769	0.000819834	0.000581279	0.709021	-0.496101	8.78375e-12	2.3114	down
meta_418	4-(Aminomethyl)-5-(Hydroxymethyl)-2-Methylpyridin-3-Ol	2.90072e-05	3.53702e-05	3.62614e-05	3.74952e-05	2.65058e-05	3.42247e-05	3.4587e-05	4.27432e-05	3.18571e-05	2.9333e-05	3.45914e-05	2.30085e-05	3.77703e-05	4.55409e-05	3.96362e-05	2.88845e-05	4.15666e-05	3.59684e-05	2.84253e-05	4.4249e-05	2.67197e-05	2.47325e-05	2.37249e-05	2.30517e-05	2.11901e-05	2.01883e-05	2.5242e-05	2.33167e-05	2.50135e-05	1.41441e-05	1.91661e-05	1.66166e-05	1.86173e-05	2.21172e-05	1.98236e-05	1.7633e-05	2.13385e-05	2.22284e-05	3.48513e-05	2.13813e-05	0.613502	-0.70486	1.63249e-09	2.13738	down
meta_419	N-Acetylglycine	0.00592599	0.00526582	0.00602959	0.00456418	0.00570038	0.00628302	0.00769749	0.0105585	0.00527713	0.0068862	0.00576266	0.00519683	0.00486373	0.00591794	0.00588788	0.00832095	0.00484694	0.00487779	0.00477763	0.00547059	0.00603032	0.00434328	0.00392584	0.00516028	0.0047577	0.00464035	0.00308105	0.00472336	0.00550577	0.00441789	0.00596662	0.00473822	0.00385559	0.00456627	0.00324397	0.00462074	0.00569698	0.00407119	0.00600556	0.0046303	0.771002	-0.375194	0.000979325	1.40514	down
meta_421	Pantetheine	0.0293678	0.0321098	0.0347446	0.0352197	0.026416	0.0340229	0.0299856	0.0362239	0.0288955	0.0312743	0.0351251	0.0278633	0.0362255	0.0389485	0.0378114	0.038279	0.0391461	0.0350016	0.030433	0.0390247	0.0310292	0.0318422	0.0301198	0.0369691	0.0329003	0.0256751	0.0311056	0.0308853	0.0309246	0.0283833	0.0305685	0.0296452	0.0297806	0.0266742	0.0320299	0.0293543	0.0321018	0.0292587	0.0338059	0.0305138	0.902616	-0.147815	0.00414123	1.16408	down
meta_425	Sarcosine	0.000240442	0.000225072	0.00028124	0.000229625	0.000247677	0.000257874	0.000251789	0.000244482	0.000207713	0.000235323	0.000239864	0.000229628	0.000260453	0.000258992	0.000242073	0.000228411	0.000234082	0.000256874	0.000200139	0.000278812	0.000174882	0.000158579	0.000128272	0.000127422	0.000140262	0.000122529	0.000132302	0.000160118	0.000135563	0.000116886	0.000132034	0.000143093	0.000115688	0.000132799	0.000147376	0.000119183	0.00011776	0.000127027	0.000242528	0.000135099	0.557043	-0.84414	2.18878e-19	2.49912	down
meta_428	LPC(17:0/0:0)	0.013467	0.00952743	0.00958152	0.0102561	0.00908708	0.0107507	0.00823231	0.00874404	0.015696	0.0112679	0.00849125	0.010546	0.0110062	0.0126082	0.00910107	0.0107688	0.00909198	0.00758753	0.0151642	0.00860733	0.0123482	0.0123331	0.0138304	0.0109208	0.0132056	0.0145083	0.0173521	0.0118009	0.0109005	0.0151073	0.0128341	0.0135724	0.0115185	0.0147071	0.00905304	0.016108	0.013366	0.0104541	0.0104791	0.0129956	1.24014	0.310502	0.00101179	1.32098	up
meta_430	Sn-Glycero-3-Phosphocholine	0.000279966	0.000231463	0.000128683	0.000209269	0.000292651	0.000242902	0.000306406	0.000234969	0.000229977	0.000162705	0.000251106	0.000234419	0.000292634	0.000221553	0.000305297	0.000181751	0.000252508	0.000137648	0.000393939	0.000171536	0.000306179	0.000319539	0.000610503	0.000253373	0.000477892	0.00053446	0.000454766	0.000341714	0.000284856	0.00036383	0.000353175	0.000433845	0.000649184	0.000366149	0.000528421	0.000479724	0.000345285	0.000272617	0.000238069	0.000409751	1.72114	0.783366	8.8744e-06	1.87089	up
meta_431	Indole	0.00118119	0.0013755	0.00131422	0.00104591	0.00136811	0.00103059	0.00119698	0.000971694	0.00113036	0.00131811	0.00124812	0.00119646	0.00109606	0.00110075	0.00109314	0.00109013	0.00134016	0.00113937	0.00119471	0.00116848	0.00122794	0.00102267	0.000965793	0.00108766	0.000998026	0.000768322	0.000962628	0.000995461	0.0010876	0.000822947	0.000825101	0.000971565	0.000723988	0.001006	0.0010052	0.00107922	0.000787465	0.000899314	0.00118	0.000957606	0.811529	-0.301286	3.7693e-06	1.76242	down
meta_433	LPC(15:0/0:0)	0.00503954	0.00458804	0.00505227	0.00428919	0.00467293	0.00695756	0.00449805	0.00507931	0.00807765	0.00580712	0.00502779	0.00652807	0.00535316	0.00747332	0.0066197	0.00542365	0.00477561	0.0031523	0.0100212	0.00683981	0.00748972	0.00726683	0.00960065	0.00710674	0.00731907	0.00645781	0.0135371	0.00731712	0.00668749	0.013686	0.00573774	0.00635567	0.00570509	0.00762333	0.00639766	0.0122313	0.00860703	0.00699591	0.00576381	0.0081179	1.40843	0.494083	0.00192318	1.31056	up
meta_438	L-Norleucine	0.00254421	0.0032668	0.00280824	0.00225424	0.00306119	0.00231246	0.00271484	0.00214767	0.00241678	0.00280016	0.00274737	0.00256878	0.00228741	0.00230962	0.00224689	0.00225697	0.00271537	0.00221253	0.00224363	0.0022472	0.00203771	0.0015977	0.00155195	0.00160704	0.00150039	0.00103821	0.00160091	0.0016078	0.00175691	0.00121445	0.00126703	0.00141907	0.00109308	0.00161679	0.00152852	0.00160564	0.00114989	0.00122035	0.00250812	0.00146741	0.585066	-0.77333	3.26129e-13	2.30833	down
meta_441	Indole-3-acetamide	1.39278e-05	3.17616e-05	2.88676e-05	2.14487e-05	1.34077e-05	1.02814e-05	1.65249e-05	2.46496e-05	2.25991e-05	2.67214e-05	3.94973e-05	2.00206e-05	3.17025e-05	2.01959e-05	3.5597e-05	2.6587e-05	1.22925e-05	2.25108e-05	3.63213e-05	3.73823e-05	4.1643e-05	2.11598e-05	2.89894e-05	4.48293e-05	3.12247e-05	2.62592e-05	3.54675e-05	5.79585e-05	4.004e-05	4.2162e-05	3.03505e-05	5.38202e-05	2.3977e-05	2.97716e-05	4.23216e-05	3.36798e-05	5.36005e-05	4.67871e-05	2.46148e-05	3.80023e-05	1.54388	0.626559	0.000211602	1.51974	up
meta_442	2-Pyrrolidinone	0.000929419	0.00111966	0.00145307	0.000903634	0.00128538	0.00106426	0.000957314	0.00124464	0.00113638	0.00133891	0.00124746	0.00101841	0.000773965	0.00089981	0.000702055	0.000930205	0.000937859	0.00112668	0.00132863	0.00139918	0.000944092	0.000929997	0.00112515	0.000803042	0.00140939	0.00133921	0.00198735	0.00146125	0.00188132	0.00146515	0.00148898	0.000540628	0.00146696	0.00149032	0.00174744	0.00197891	0.001879	0.0018532	0.00108985	0.00143286	1.31473	0.394768	0.00494268	1.22648	up
meta_444	N1-Acetylspermine	3.40921e-05	4.48802e-05	3.47981e-05	2.43666e-05	2.33057e-05	1.83267e-05	2.77817e-05	2.72874e-05	2.55208e-05	2.46938e-05	2.6482e-05	2.47778e-05	1.51973e-05	1.72255e-05	1.5341e-05	1.84552e-05	2.47611e-05	3.20512e-05	1.38308e-05	2.56759e-05	2.28744e-05	1.71441e-05	1.17166e-05	2.07059e-05	2.58169e-05	1.67335e-05	1.51777e-05	2.07501e-05	2.16917e-05	1.24319e-05	2.05034e-05	6.77382e-06	1.49748e-05	1.49225e-05	1.2485e-05	1.0808e-05	2.65414e-05	2.53209e-05	2.49425e-05	1.76318e-05	0.706898	-0.500427	0.00185378	1.32439	down
meta_448	N-Acetyl-L-Histidine	1.43151e-05	1.51713e-05	1.28366e-05	1.25136e-05	1.22708e-05	1.45081e-05	1.42438e-05	1.46998e-05	1.17239e-05	9.1512e-06	1.56014e-05	1.11869e-05	1.53083e-05	1.55766e-05	1.47684e-05	1.63304e-05	1.17778e-05	1.34719e-05	1.02372e-05	9.32982e-06	1.19567e-05	1.06705e-05	1.16448e-05	1.05826e-05	9.80477e-06	1.10289e-05	8.56716e-06	9.92493e-06	7.8351e-06	9.51515e-06	7.77749e-06	1.09025e-05	5.36605e-06	8.70537e-06	1.05259e-05	1.02527e-05	7.75828e-06	1.18969e-05	1.32511e-05	9.70643e-06	0.732497	-0.449104	2.48094e-06	1.78967	down
meta_453	Butylamine	1.77316e-05	2.81347e-05	1.78363e-05	1.80849e-05	2.1325e-05	1.46859e-05	2.15557e-05	1.01301e-05	1.56342e-05	1.54705e-05	2.19814e-05	2.86498e-05	1.42032e-05	1.85029e-05	1.67924e-05	2.20429e-05	2.42097e-05	2.21298e-05	2.17696e-05	2.34558e-05	1.98705e-05	1.48208e-05	1.96572e-05	2.24953e-05	1.34357e-05	1.87969e-05	1.29221e-05	1.07567e-05	1.4659e-05	1.69454e-05	1.1654e-05	2.21729e-05	1.47592e-05	2.30028e-05	1.42902e-05	1.17498e-05	1.42742e-05	1.14116e-05	1.97163e-05	1.59819e-05	0.810592	-0.302952	0.012155	1.04392	down
meta_456	Barbituric acid	0.00236176	0.00256451	0.00257729	0.00204322	0.00235844	0.00292434	0.002815	0.00211121	0.00255571	0.00219081	0.00209099	0.00227036	0.00239614	0.00178832	0.00242439	0.00229819	0.00265332	0.0022954	0.00214457	0.00283401	0.002109	0.00216471	0.00177219	0.00223354	0.00146052	0.00191947	0.00204298	0.00157547	0.00226339	0.00152917	0.00160153	0.00230363	0.00177952	0.00204855	0.00258968	0.00165843	0.0018005	0.00140554	0.0023849	0.00190321	0.798027	-0.325491	4.10693e-05	1.62245	down
meta_457	3-(Methylthio)-1-propanol	8.65316e-06	3.51055e-05	6.76035e-06	7.63376e-05	1.54862e-05	3.854e-05	1.19225e-05	1.75392e-05	1.4068e-05	1.38396e-05	1.44759e-05	1.95724e-05	1.13847e-05	2.2504e-05	1.09317e-05	4.77533e-05	2.14024e-05	2.55538e-05	1.31578e-05	1.4449e-05	7.74011e-06	1.46723e-05	5.41631e-06	1.05558e-05	9.62341e-06	9.23825e-06	1.02804e-05	2.44085e-05	1.9792e-05	2.04672e-05	1.83671e-06	1.27887e-05	5.28536e-06	5.67045e-06	1.05107e-05	9.72514e-06	1.89529e-05	8.90772e-06	2.19719e-05	1.14373e-05	0.520545	-0.941906	0.0137472	1.08489	down
meta_458	2-Pentyl-3-phenyl-2-propenal	4.2012e-05	3.80007e-05	4.82623e-05	4.23281e-05	2.69092e-05	2.56012e-05	2.9265e-05	3.26584e-05	2.62827e-05	2.69844e-05	2.4585e-05	2.44988e-05	2.85721e-05	2.85407e-05	2.79917e-05	3.65795e-05	3.00831e-05	3.18417e-05	2.4076e-05	3.47363e-05	2.29697e-05	2.41225e-05	2.02988e-05	2.49204e-05	2.16336e-05	1.71279e-05	2.0712e-05	2.06136e-05	2.13191e-05	1.84961e-05	2.14524e-05	2.51636e-05	2.19521e-05	2.18561e-05	2.02268e-05	2.20292e-05	2.07798e-05	2.03489e-05	3.14904e-05	2.14457e-05	0.681023	-0.554225	2.14342e-06	1.87885	down
meta_460	6-Methylnicotinamide	0.00402142	0.00466773	0.00191122	0.00200798	0.00297864	0.00227295	0.0023205	0.00101005	0.00199149	0.00216868	0.00167377	0.00235802	0.00102376	0.0026566	0.0017365	0.003834	0.00170216	0.00404988	1.15604e-05	0.00188967	0.00152739	0.0023461	0.000741154	0.0026286	1.1297e-05	6.13293e-06	3.75984e-05	6.64109e-05	3.32827e-05	5.3128e-06	1.84566e-05	0.000437771	7.52357e-06	7.44151e-06	3.18283e-05	0.000143754	2.60211e-05	0.00075627	0.00231433	0.000490686	0.212021	-2.23772	2.17256e-06	1.82097	down
meta_462	Gly-Phe	0.000641963	0.00033264	0.00102051	0.000538548	0.000587647	0.000611185	0.000332128	0.0005481	0.000747902	0.000699479	0.000487781	0.000550464	0.000560248	0.000421244	0.000506583	0.000657194	0.000346006	0.000335856	0.000236285	0.000711695	0.000411338	0.00065064	0.000230285	0.00051015	7.52395e-05	0.000194839	6.11423e-05	0.000621204	0.000146236	0.000202805	0.00024292	0.000563935	5.89333e-05	0.000158382	9.51272e-05	0.00023943	0.000286901	0.000352866	0.000543673	0.000283465	0.521389	-0.939567	0.000149683	1.53775	down
meta_463	N-Methylalanine	0.000353465	0.000384102	0.000323697	0.000341097	0.000375818	0.000286154	0.000419207	0.000300633	0.000413718	0.000409319	0.000437993	0.000422586	0.000262017	0.000334842	0.000332025	0.000411889	0.000413416	0.0004142	0.000390852	0.000291538	0.000337806	0.00037505	0.000475221	0.000389977	0.000477828	0.000475462	0.000416228	0.000435831	0.00049422	0.000479079	0.000441135	0.000481465	0.000336538	0.000451465	0.000380186	0.000400786	0.000462396	0.000391325	0.000365928	0.000427889	1.16932	0.225674	0.000827118	1.3512	up
meta_467	Phosphocholine	0.00022899	0.000263715	0.000190705	0.000195147	0.000188874	0.000215977	0.000214262	0.000177333	0.000191179	0.000184802	0.000230366	0.000173228	0.000183685	0.000246873	0.000172757	0.000187643	0.000215083	0.000245096	0.000107193	0.00015611	0.000189525	0.000206689	0.000102809	0.000222766	0.000131034	0.000131018	0.000114221	0.000207567	0.000157907	0.000113234	0.000130875	0.000249693	0.000104184	0.000162582	0.000158055	0.000168615	0.000172755	0.000218505	0.000198451	0.000163446	0.823611	-0.279966	0.0123463	1.11527	down
meta_470	L-Tryptophanamide	8.89413e-06	1.77549e-05	1.23947e-05	7.19993e-06	1.07049e-05	1.02717e-05	1.2272e-05	9.00899e-06	2.20916e-05	1.03947e-05	1.25514e-05	1.23016e-05	1.40397e-05	1.62283e-05	1.16451e-05	1.26037e-05	1.96716e-05	1.40694e-05	1.92741e-05	1.70512e-05	5.93177e-05	4.44564e-05	4.17442e-05	5.62574e-05	4.36532e-05	2.99059e-05	4.65573e-05	4.39475e-05	5.87888e-05	3.42058e-05	4.00892e-05	4.49523e-05	3.62108e-05	4.89418e-05	4.95655e-05	5.73348e-05	3.53136e-05	4.1432e-05	1.35212e-05	4.51486e-05	3.3391	1.73946	5.82478e-13	2.43161	up
meta_472	Acetylcholine	3.72852e-05	7.07221e-05	0.000143123	7.75085e-05	6.75906e-05	7.61642e-05	4.11696e-05	6.01707e-05	7.34118e-05	4.72912e-05	4.65663e-05	4.37366e-05	0.000139594	5.42876e-05	6.15135e-05	3.89597e-05	7.50599e-05	7.44441e-05	5.38108e-05	0.000111233	7.0626e-05	4.54112e-05	1.33008e-05	0.000103863	4.28927e-05	4.84079e-05	2.03321e-05	3.73356e-05	5.85652e-05	3.09899e-05	3.65073e-05	4.57075e-05	5.25283e-05	3.26957e-05	4.00322e-05	4.94014e-05	4.441e-05	4.85198e-05	6.96821e-05	4.56404e-05	0.65498	-0.610478	0.00599233	1.11064	down
meta_473	1-Hydroxylamino-2-phenylethane	0.0012125	0.00126171	0.00152086	0.00137331	0.00121215	0.00122456	0.00133608	0.00115189	0.00150516	0.00125208	0.00138328	0.0011574	0.00127633	0.00137768	0.00133594	0.00133908	0.00133726	0.00113181	0.00122249	0.0012816	0.00119245	0.00113013	0.00113534	0.00121747	0.00122461	0.00105712	0.00101571	0.00123825	0.00139959	0.0010718	0.00113878	0.00112811	0.00106085	0.0011876	0.00115596	0.001271	0.00129771	0.00113032	0.00129466	0.0011696	0.903406	-0.146554	0.000522318	1.4205	down
meta_476	Threoninyl-Phenylalanine	2.60591e-06	3.74673e-06	1.21227e-05	8.26572e-06	3.20404e-06	4.46207e-06	4.02612e-06	4.43282e-06	9.41516e-06	3.24506e-06	4.56341e-06	7.95921e-06	4.00223e-06	5.39131e-06	2.73883e-06	3.76782e-06	5.76324e-06	2.52579e-06	2.05559e-06	4.60582e-06	3.80491e-06	1.34156e-06	1.50856e-06	2.56544e-06	1.08963e-06	9.46032e-07	3.23557e-07	3.74363e-06	2.26617e-06	1.40422e-06	1.9117e-06	3.90269e-06	9.04613e-07	1.06585e-06	1.33978e-07	1.96667e-06	2.07414e-06	2.53069e-06	4.94498e-06	1.86022e-06	0.376185	-1.41049	5.05097e-05	1.67207	down
meta_480	DL-O-tyrosine	0.047135	0.0479997	0.0577381	0.0492252	0.0494483	0.0553525	0.0561704	0.052384	0.0484034	0.0488034	0.0483242	0.0427945	0.0573854	0.0536466	0.0535654	0.0532437	0.0558427	0.0510059	0.045044	0.0616288	0.0495492	0.0441938	0.0408775	0.0486624	0.0438781	0.0415736	0.0431139	0.0445796	0.0494561	0.0401544	0.0429086	0.0445701	0.0483285	0.0460009	0.044006	0.0434286	0.046421	0.0424663	0.0517571	0.044676	0.863187	-0.212255	3.26895e-06	1.77903	down
meta_481	PC(8:0/8:0)	1.96462e-05	1.32985e-05	9.41869e-06	1.11438e-05	1.49059e-05	1.01022e-05	7.15336e-06	9.83765e-06	2.19608e-05	1.67332e-05	1.78159e-05	2.43642e-05	1.61369e-05	2.51212e-05	1.15067e-05	1.51128e-05	8.25111e-06	4.05792e-06	2.15225e-05	1.11335e-05	1.48149e-05	2.45815e-05	1.84708e-05	1.19336e-05	1.49234e-05	1.80058e-05	3.10892e-05	2.19917e-05	1.43293e-05	2.19262e-05	1.09793e-05	2.77657e-05	2.56564e-05	1.99223e-05	1.77112e-05	1.7675e-05	1.7204e-05	1.80021e-05	1.44612e-05	1.92768e-05	1.33301	0.414683	0.012574	1.09518	up
meta_486	Allopurinol	0.00333671	0.00372338	0.00164533	0.00165764	0.00242772	0.00198846	0.00190359	0.000873919	0.00158704	0.00199763	0.00127194	0.00191612	0.000822265	0.00219681	0.00149236	0.00358016	0.00154026	0.00373435	2.47452e-05	0.00174094	0.00131802	0.00206468	0.000614819	0.00213675	1.15031e-09	1.59204e-05	5.89702e-05	5.78591e-05	3.69405e-05	1.10001e-05	1.04977e-05	0.000387517	1.18309e-05	4.35653e-06	1.78803e-05	0.000114226	3.12479e-05	0.000706588	0.00197307	0.000422173	0.213968	-2.22454	2.63403e-06	1.81019	down
meta_488	2-Aminomethylpyrimidine	0.000174625	0.00014934	0.000152903	0.000129405	0.000155358	0.000117026	0.000139702	0.00012251	0.000128785	0.000146234	0.000158176	0.000124111	0.000134415	0.000152093	0.00015653	0.00016628	0.000139858	0.000146816	0.000123408	0.000133515	0.000131322	0.000144097	0.000132541	0.000128718	0.000126904	0.000108723	0.000133643	0.000113474	0.000116075	0.000121994	0.000124239	9.39883e-05	0.000132374	0.000136482	0.000166719	0.000123237	7.64443e-05	0.000105146	0.000142554	0.000123118	0.863654	-0.211475	0.00218997	1.22151	down
meta_491	3-Carboxypropyltrimethylammonium	3.72852e-05	7.07221e-05	0.000143123	7.75085e-05	6.75906e-05	7.61642e-05	4.11696e-05	6.01707e-05	7.34118e-05	4.72912e-05	4.65663e-05	4.37366e-05	0.000139594	5.42876e-05	6.15135e-05	3.89597e-05	7.50599e-05	7.44441e-05	5.38108e-05	0.000111233	7.0626e-05	4.54112e-05	1.33008e-05	0.000103863	4.28927e-05	4.84079e-05	2.03321e-05	3.73356e-05	5.85652e-05	3.09899e-05	3.65073e-05	4.57075e-05	5.25283e-05	3.26957e-05	4.00322e-05	4.94014e-05	4.441e-05	4.85198e-05	6.96821e-05	4.56404e-05	0.65498	-0.610478	0.00599233	1.11064	down
meta_492	LPC(O-18:0/0:0)	0.00295963	0.00225294	0.00210975	0.00282549	0.00147867	0.00144968	0.001964	0.00149545	0.00203183	0.00184896	0.00104677	0.00107876	0.00205066	0.00185196	0.0014629	0.00203739	0.00189686	0.00127145	0.00269797	0.00201941	0.00204617	0.00185641	0.0033722	0.00223545	0.00255395	0.00295844	0.0023291	0.00170029	0.00157136	0.00228619	0.00157266	0.00208934	0.00253387	0.00294058	0.00283124	0.00223988	0.00185133	0.00238628	0.00189153	0.00229749	1.21462	0.280505	0.0212161	1.00545	up
meta_496	PC(O-16:0/O-2:0)	0.00295963	0.00225294	0.00210975	0.00282549	0.00147867	0.00144968	0.001964	0.00149545	0.00203183	0.00184896	0.00104677	0.00107876	0.00205066	0.00185196	0.0014629	0.00203739	0.00189686	0.00127145	0.00269797	0.00201941	0.00204617	0.00185641	0.0033722	0.00223545	0.00255395	0.00295844	0.0023291	0.00170029	0.00157136	0.00228619	0.00157266	0.00208934	0.00253387	0.00294058	0.00283124	0.00223988	0.00185133	0.00238628	0.00189153	0.00229749	1.21462	0.280505	0.0212161	1.00545	up
meta_498	N-Acetylcadaverine	3.31894e-05	4.11502e-05	3.97189e-05	3.27124e-05	2.66908e-05	3.80885e-05	3.02709e-05	2.94266e-05	2.9902e-05	3.00116e-05	3.02029e-05	3.16748e-05	3.42278e-05	3.27245e-05	3.59426e-05	3.37262e-05	4.17651e-05	3.11694e-05	2.2682e-05	2.83929e-05	2.65477e-05	2.89777e-05	1.44276e-05	2.9564e-05	1.88946e-05	1.78346e-05	1.33925e-05	2.41276e-05	2.90831e-05	1.40594e-05	1.93312e-05	3.33181e-05	1.33887e-05	2.09764e-05	2.07315e-05	1.82377e-05	2.60688e-05	2.24123e-05	3.26835e-05	2.1743e-05	0.665259	-0.588012	9.18223e-07	1.88115	down
meta_500	Hypotaurocyamine	3.50925e-05	3.66444e-05	5.24738e-05	1.99389e-05	3.01442e-05	2.58185e-05	2.54628e-05	1.00003e-05	1.30348e-05	2.07533e-05	1.4357e-05	1.88822e-05	1.5038e-05	2.05156e-05	2.08652e-05	3.86868e-05	1.89436e-05	4.02681e-05	1.1678e-06	2.14998e-05	1.13929e-05	3.06972e-05	7.63773e-06	2.7884e-05	9.91546e-07	4.55071e-07	1.05841e-09	2.52936e-06	8.74803e-07	4.25251e-07	1.36408e-06	6.41345e-06	7.60275e-07	1.083e-09	1.17068e-09	3.96022e-06	1.31866e-06	7.37564e-06	2.39794e-05	5.78242e-06	0.241141	-2.05205	6.773e-06	1.7282	down
meta_502	PC(O-16:0/O-1:0)	0.0554003	0.0652381	0.0707978	0.0679958	0.0674553	0.0690407	0.0712177	0.0709304	0.0632442	0.0671865	0.0661495	0.0614742	0.065676	0.0729915	0.0704296	0.0685641	0.0714526	0.0631553	0.0669673	0.0719222	0.0662516	0.063277	0.0615181	0.0665796	0.0674212	0.0620047	0.060793	0.0677664	0.0642831	0.0611003	0.0646055	0.0645232	0.064636	0.0628872	0.0670919	0.0529098	0.0658968	0.0587396	0.0673644	0.0634603	0.942044	-0.0861335	0.00440632	1.16229	down
meta_505	20,26-dihydroxyecdysone	0.0499256	0.049013	0.0485538	0.0489948	0.0465765	0.0486185	0.0508498	0.0483686	0.0475761	0.0462848	0.0475621	0.0451787	0.049748	0.0509229	0.049163	0.0477432	0.0494135	0.0470872	0.0528895	0.0504406	0.0486907	0.0488612	0.04956	0.048877	0.0500451	0.0519713	0.0497878	0.0517599	0.0494953	0.0505065	0.0490679	0.0500755	0.05083	0.0504568	0.0538216	0.0510932	0.04918	0.0491046	0.0487455	0.0501769	1.02936	0.0417544	0.00862186	1.15021	up
meta_506	Guanine	6.09841e-06	3.80711e-06	4.95873e-06	1.83912e-06	2.52488e-06	6.07008e-06	4.07081e-06	3.44639e-06	2.19632e-06	2.53885e-06	1.9267e-06	1.68881e-06	2.79408e-06	2.88376e-06	1.57159e-06	9.08784e-06	2.23627e-06	5.13565e-06	6.66825e-07	6.39281e-06	1.49472e-06	5.56592e-06	1.05384e-06	2.52484e-06	4.71233e-07	2.66177e-07	1.77155e-07	1.99524e-07	1.26659e-06	2.58545e-07	1.89784e-07	4.03964e-07	7.59279e-07	1.81197e-07	6.93592e-07	8.53045e-08	9.95237e-08	6.72624e-07	3.59675e-06	9.09101e-07	0.252756	-1.98418	3.88749e-05	1.62098	down
meta_508	Leu-Gly	4.74003e-05	2.99657e-05	3.65826e-05	8.93632e-06	1.6297e-05	2.72607e-05	5.23812e-05	1.49971e-05	2.14375e-05	2.86545e-05	2.93909e-05	2.41654e-05	2.53541e-05	2.34221e-05	2.32744e-05	2.31067e-05	2.03951e-05	3.72433e-05	1.16627e-05	3.90132e-05	1.50834e-05	4.43042e-05	2.48961e-05	1.14174e-05	1.26307e-05	1.43868e-05	3.98611e-06	2.21387e-05	7.29148e-06	1.73154e-05	7.42964e-06	1.46132e-05	7.65053e-06	1.80367e-05	5.10835e-06	1.03613e-05	1.73006e-05	1.25606e-05	2.7047e-05	1.48062e-05	0.547424	-0.869271	0.000742281	1.37892	down
meta_509	LPC(0:0/22:4)	0.000554041	0.000601623	0.000229385	0.000412792	0.000473122	0.000423389	0.000393995	0.000585489	0.00050253	0.000537988	0.000558553	0.000567836	0.000508792	0.000469477	0.00040925	0.000335578	0.000231979	0.000289323	0.000558096	0.000465616	0.000554592	0.000917344	0.000934297	0.000649351	0.00107869	0.00101128	0.000976011	0.000420143	0.00082519	0.00127526	0.000598691	0.000487413	0.000996628	0.00165831	0.00112124	0.000744771	0.000407759	0.000830186	0.000455443	0.000860397	1.88915	0.917734	5.10069e-05	1.78813	up
meta_510	LPC(22:4/0:0)	0.000554041	0.000601623	0.000229385	0.000412792	0.000473122	0.000423389	0.000393995	0.000585489	0.00050253	0.000537988	0.000558553	0.000567836	0.000508792	0.000469477	0.00040925	0.000335578	0.000231979	0.000289323	0.000558096	0.000465616	0.000554592	0.000917344	0.000934297	0.000649351	0.00107869	0.00101128	0.000976011	0.000420143	0.00082519	0.00127526	0.000598691	0.000487413	0.000996628	0.00165831	0.00112124	0.000744771	0.000407759	0.000830186	0.000455443	0.000860397	1.88915	0.917734	5.10069e-05	1.78813	up
meta_511	LPC(0:0/22:5)	0.000402752	0.000591907	0.000162941	0.00067577	0.000350986	0.000352365	0.000507188	0.000803991	0.000612213	0.000638949	0.000623001	0.000596246	0.000343462	0.000358091	0.000468022	0.000356027	0.000183128	0.000209369	0.000625889	0.000707189	0.000990335	0.000874548	0.000551243	0.000528235	0.00117488	0.00126022	0.00101103	0.000415572	0.000674104	0.0010366	0.000642337	0.000264679	0.000870344	0.00124075	0.00107328	0.00118434	0.00018087	0.00081374	0.000478474	0.000821506	1.71693	0.77983	0.00069358	1.46034	up
meta_512	LPC(22:5/0:0)	0.00284537	0.00182635	0.00161201	0.00183383	0.00279853	0.00182632	0.000944882	0.00193315	0.0017416	0.00182846	0.00225826	0.00291042	0.0016913	0.00175254	0.00302002	0.00148051	0.00148864	0.000989233	0.00255342	0.00138576	0.00198559	0.00257622	0.00228453	0.0022766	0.00229449	0.00259689	0.00304976	0.00310615	0.00206004	0.00428297	0.00232875	0.00310447	0.00227956	0.00309581	0.0023043	0.00307078	0.00164454	0.00304794	0.00193603	0.00263274	1.35987	0.443466	0.00121692	1.38493	up
meta_514	LPC(20:2/0:0)	0.00300508	0.00323315	0.00247468	0.00412629	0.00318327	0.00455619	0.00280976	0.00339963	0.00334729	0.00286289	0.00317108	0.00302401	0.00349731	0.00269695	0.00321275	0.00289469	0.00312595	0.00275223	0.00628397	0.00190733	0.00299181	0.00305658	0.00607248	0.00265484	0.00446092	0.00863313	0.00360649	0.00348604	0.00390915	0.00604566	0.00743543	0.00407916	0.00488631	0.00545686	0.00344663	0.00447196	0.00626096	0.00451183	0.00327823	0.00474813	1.44838	0.534443	0.00219234	1.32262	up
meta_515	LPC(0:0/20:2)	0.00300508	0.00323315	0.00247468	0.00412629	0.00318327	0.00455619	0.00280976	0.00339963	0.00334729	0.00286289	0.00317108	0.00302401	0.00349731	0.00269695	0.00321275	0.00289469	0.00312595	0.00275223	0.00628397	0.00190733	0.00299181	0.00305658	0.00607248	0.00265484	0.00446092	0.00863313	0.00360649	0.00348604	0.00390915	0.00604566	0.00743543	0.00407916	0.00488631	0.00545686	0.00344663	0.00447196	0.00626096	0.00451183	0.00327823	0.00474813	1.44838	0.534443	0.00219234	1.32262	up
meta_518	LPC(0:0/20:4)	0.0271955	0.0176062	0.0130035	0.0174303	0.0196338	0.0186484	0.0140093	0.0247687	0.0184674	0.0225745	0.0215679	0.0251236	0.024014	0.0177538	0.0225216	0.0177121	0.0145962	0.014147	0.0214129	0.0213479	0.0255557	0.024055	0.0245438	0.0275887	0.0260866	0.0270642	0.0241177	0.0193893	0.0210084	0.025961	0.0254704	0.0168736	0.0243414	0.0283011	0.0226527	0.0234811	0.0168055	0.0207831	0.0196767	0.02356	1.19735	0.259847	0.00271561	1.25694	up
meta_519	LPC(20:4/0:0)	0.0271955	0.0176062	0.0130035	0.0174303	0.0196338	0.0186484	0.0140093	0.0247687	0.0184674	0.0225745	0.0215679	0.0251236	0.024014	0.0177538	0.0225216	0.0177121	0.0145962	0.014147	0.0214129	0.0213479	0.0255557	0.024055	0.0245438	0.0275887	0.0260866	0.0270642	0.0241177	0.0193893	0.0210084	0.025961	0.0254704	0.0168736	0.0243414	0.0283011	0.0226527	0.0234811	0.0168055	0.0207831	0.0196767	0.02356	1.19735	0.259847	0.00271561	1.25694	up
meta_522	LPC(18:0/0:0)	0.0550016	0.0522526	0.0572979	0.0549079	0.0523966	0.054177	0.056019	0.0554584	0.0500677	0.052149	0.0516249	0.0478641	0.055959	0.0566155	0.0570554	0.0548039	0.0517766	0.0526223	0.0546754	0.0530883	0.0513719	0.0500492	0.049119	0.0512979	0.0531829	0.0510888	0.0496761	0.0546591	0.0517334	0.0494173	0.0538258	0.0538802	0.0528397	0.050949	0.0536252	0.0518731	0.0516478	0.0515497	0.0537907	0.0517659	0.962359	-0.0553536	0.0048166	1.14168	down
meta_524	LPC(18:2/0:0)	0.0517107	0.0523021	0.0524128	0.0534116	0.0535008	0.0559875	0.0536651	0.0551334	0.0490672	0.0546824	0.054288	0.0515892	0.0572246	0.0544185	0.0529283	0.0534992	0.0596941	0.0565745	0.0509095	0.0590521	0.0514169	0.0469012	0.046933	0.0519213	0.0490354	0.0467158	0.046034	0.0497061	0.0479013	0.0447652	0.0489066	0.0501303	0.0458485	0.0474437	0.0484351	0.0470797	0.0478442	0.0480129	0.0541026	0.0480573	0.888262	-0.170943	1.50631e-09	2.11659	down
meta_527	LPC(0:0/16:0)	0.0632453	0.0648156	0.0696988	0.0665335	0.066083	0.06748	0.0703225	0.0695733	0.0615786	0.0655785	0.0657752	0.0610667	0.0707632	0.0721008	0.0691759	0.0682956	0.06941	0.0696875	0.0650466	0.0742199	0.0640532	0.0616005	0.0596936	0.06565	0.0639792	0.0604387	0.0595182	0.065168	0.0631236	0.0582909	0.0634132	0.0628889	0.0632377	0.0602182	0.0647922	0.0525834	0.0636264	0.0621181	0.0675225	0.0619108	0.916891	-0.125178	6.56421e-06	1.71936	down
meta_531	Carnitine C20:1-OH	1.35787e-06	8.30517e-07	3.5564e-07	5.59853e-07	8.00602e-07	5.11882e-07	1.15631e-06	7.28535e-07	2.69877e-06	1.70448e-06	1.0318e-06	1.72536e-06	1.39685e-06	4.74242e-07	5.52701e-07	1.26372e-06	7.75363e-07	5.14248e-07	6.04968e-07	1.29088e-06	1.94683e-06	1.68876e-06	1.85396e-06	1.10656e-06	1.1231e-06	9.74137e-07	2.01593e-06	1.70638e-06	1.72003e-06	9.73286e-07	1.40705e-06	8.45492e-07	2.10872e-06	1.81967e-06	7.93737e-07	7.49834e-07	1.26167e-06	2.67178e-06	1.01673e-06	1.48705e-06	1.46258	0.54852	0.0134778	1.02769	up
meta_578	16-Dehydroprogesterone	1.60684e-05	1.19753e-05	9.83031e-06	1.60479e-05	1.55706e-05	1.2168e-05	1.02214e-05	1.25098e-05	1.52708e-05	1.01908e-05	1.02927e-05	1.49435e-05	1.08156e-05	1.04171e-05	8.52272e-06	1.19451e-05	1.24712e-05	5.65517e-06	2.01664e-05	9.88906e-06	1.18032e-05	1.97276e-05	1.78386e-05	1.34918e-05	1.72138e-05	1.40757e-05	2.26313e-05	1.94251e-05	1.19626e-05	1.80277e-05	1.02782e-05	1.21261e-05	1.05232e-05	1.72353e-05	2.00096e-05	1.63096e-05	9.16956e-06	1.99608e-05	1.22486e-05	1.56561e-05	1.2782	0.354108	0.00789183	1.19049	up
meta_580	Phe-Asn	2.79966e-05	2.03697e-05	0.000242873	4.50753e-05	0.000110111	3.86092e-05	1.99996e-05	8.39617e-05	4.98642e-05	4.3209e-05	3.0107e-05	8.99326e-05	5.8518e-05	4.68974e-05	4.60304e-05	4.07274e-05	3.23874e-05	1.36094e-05	2.18767e-05	4.43778e-05	5.02833e-05	1.66814e-05	4.59857e-06	6.57922e-05	5.00374e-06	1.04943e-05	4.67055e-06	1.75859e-05	8.51664e-06	1.22533e-05	6.24692e-06	6.63922e-06	3.92468e-06	6.85031e-06	2.87234e-06	6.17119e-06	1.25161e-05	2.5552e-05	5.53266e-05	1.4814e-05	0.267756	-1.90101	0.00250813	1.2474	down
meta_581	Phe-Met	2.41712e-05	2.3368e-05	2.83515e-05	2.14162e-05	3.52232e-05	2.4691e-05	2.13752e-05	1.95447e-05	3.4081e-05	2.56313e-05	2.62306e-05	2.67694e-05	2.01661e-05	1.99066e-05	2.40272e-05	2.7706e-05	1.92363e-05	1.32938e-05	8.77526e-06	1.77148e-05	2.12527e-05	1.85911e-05	1.32028e-05	2.51131e-05	1.2399e-05	5.40902e-06	8.03278e-06	1.0528e-05	1.07514e-05	9.43028e-06	7.6415e-06	1.18849e-05	7.28313e-06	9.43146e-06	9.37536e-06	1.31995e-05	9.18465e-06	1.0146e-05	2.3084e-05	1.18254e-05	0.512276	-0.965006	4.69889e-07	1.88807	down
meta_588	Carnitine C12:3	0.000161522	8.53901e-05	0.000212863	0.000112365	0.000127184	0.000111991	0.00013775	0.000162013	0.000147112	9.86604e-05	0.000243864	0.000162202	6.61875e-05	6.42752e-05	0.000206602	7.53287e-05	6.91982e-05	0.000266663	0.000105551	4.66689e-05	0.000128636	3.71675e-05	4.3816e-05	0.000133583	8.15701e-05	4.1444e-05	8.13309e-05	7.72391e-05	6.19388e-05	4.52978e-05	7.69847e-05	9.30075e-05	6.47091e-05	3.13515e-05	2.78077e-05	6.00705e-05	0.000139155	4.22339e-05	0.000133169	7.04079e-05	0.528709	-0.919454	0.000521004	1.45393	down
meta_593	Aniline	5.82557e-05	7.53337e-05	7.30373e-05	7.77023e-05	5.6437e-05	6.31534e-05	7.81337e-05	4.59646e-05	7.22259e-05	7.2878e-05	5.91007e-05	7.08529e-05	4.68983e-05	6.4808e-05	5.3438e-05	5.50928e-05	5.55412e-05	6.92929e-05	7.63794e-05	5.92683e-05	4.67753e-05	3.39164e-05	4.00224e-05	6.48913e-05	3.87388e-05	2.64859e-05	5.22234e-05	4.03567e-05	6.13035e-05	4.4054e-05	3.37446e-05	4.75283e-05	3.12053e-05	4.05522e-05	3.74905e-05	4.40549e-05	5.17232e-05	4.43305e-05	6.41897e-05	4.32998e-05	0.674561	-0.56798	2.11777e-07	1.99012	down
meta_597	PC(O-16:0/0:0)	0.0097896	0.00959303	0.00834218	0.0117371	0.00692094	0.00728523	0.00635769	0.0083672	0.00919313	0.00907525	0.00622893	0.00542932	0.00832013	0.00800147	0.00678183	0.00912078	0.00827523	0.00689939	0.0133519	0.00989946	0.00972756	0.00786489	0.0133124	0.00823452	0.0136657	0.0170273	0.0102424	0.00917814	0.0106335	0.013891	0.00809762	0.00980316	0.012143	0.0138202	0.0151578	0.0102033	0.00970984	0.0104076	0.00844849	0.0112844	1.33568	0.41757	0.000702567	1.4551	up
meta_598	LPC(O-18:1/0:0)	0.00760432	0.00637057	0.00682206	0.00923448	0.00593396	0.00563559	0.00676848	0.00652535	0.010073	0.00703972	0.00515425	0.00498532	0.00728238	0.00630617	0.00591556	0.0065898	0.00692379	0.00570525	0.0128982	0.00526872	0.0108038	0.00596503	0.0139634	0.00725329	0.0111958	0.0152022	0.00807629	0.00942499	0.00967246	0.0128992	0.0101759	0.0090995	0.0135336	0.0120254	0.00817203	0.00882705	0.0101867	0.0110863	0.00695185	0.0104202	1.4989	0.583909	2.97604e-05	1.67589	up
meta_599	LPC(O-0:0/18:0)	0.00295963	0.00225294	0.00210975	0.00282549	0.00147867	0.00144968	0.001964	0.00149545	0.00203183	0.00184896	0.00104677	0.00107876	0.00205066	0.00185196	0.0014629	0.00203739	0.00189686	0.00127145	0.00269797	0.00201941	0.00204617	0.00185641	0.0033722	0.00223545	0.00255395	0.00295844	0.0023291	0.00170029	0.00157136	0.00228619	0.00157266	0.00208934	0.00253387	0.00294058	0.00283124	0.00223988	0.00185133	0.00238628	0.00189153	0.00229749	1.21462	0.280505	0.0212161	1.00545	up
meta_603	Phe-Glu	0.000335969	0.000299175	0.000475827	0.00044193	0.000612533	0.000341429	0.00032696	0.000310263	0.000442026	0.000426398	0.000388893	0.000393077	0.000439754	0.000342013	0.000274483	0.000331355	0.000358726	0.000294771	0.000148164	0.000337608	0.000254856	0.000241274	0.000128202	0.000302243	7.80527e-05	8.55991e-05	9.589e-05	0.000194251	0.000147777	9.49018e-05	0.000121662	0.000247006	4.734e-05	8.72149e-05	4.77782e-05	0.000174326	0.000229431	0.000243071	0.000366068	0.000156715	0.428105	-1.22396	1.05768e-08	2.05831	down
meta_604	Glu Val Phe	7.6259e-06	4.15519e-06	2.62978e-05	1.04019e-05	9.32281e-06	9.3592e-06	8.61195e-06	5.38204e-06	1.1638e-05	1.26125e-05	5.70794e-06	5.77911e-06	3.5622e-06	2.88467e-06	9.13885e-06	1.34963e-05	5.11855e-06	5.75306e-06	2.44919e-06	1.20219e-05	5.46603e-06	1.0512e-05	9.61255e-07	1.49796e-05	6.25886e-07	2.04658e-06	7.9093e-07	5.71886e-06	1.26394e-06	1.43022e-06	2.53028e-06	2.15573e-06	2.92498e-07	1.33991e-06	1.8904e-06	2.52904e-06	5.61516e-06	5.70733e-06	8.56595e-06	3.65865e-06	0.427115	-1.2273	0.00245726	1.25986	down
meta_605	Leu-Gly-Leu	3.22867e-06	3.8881e-06	4.55141e-06	4.1576e-06	4.98517e-06	3.37986e-06	4.86343e-06	4.93669e-06	3.81413e-06	4.12611e-06	3.33862e-06	2.43692e-06	3.299e-06	2.18082e-06	2.58344e-06	2.20676e-06	3.37418e-06	3.87989e-06	2.19158e-06	4.87273e-06	2.16694e-06	2.13893e-06	9.8588e-07	2.57911e-06	2.21896e-06	1.19753e-06	1.94454e-06	1.65166e-06	2.99962e-06	1.33951e-06	1.41222e-06	3.05204e-07	1.61801e-06	9.2151e-07	2.23666e-06	1.42434e-06	1.43735e-06	1.6913e-06	3.61475e-06	1.68163e-06	0.465212	-1.10404	1.69871e-08	2.04068	down
meta_609	LPC(0:0/17:0)	0.0150794	0.0103871	0.0107175	0.011594	0.0103517	0.0125718	0.00962613	0.00998821	0.0173227	0.0127837	0.00965159	0.0125729	0.0126028	0.0147274	0.0104061	0.0126221	0.0105286	0.00898975	0.0177138	0.00978111	0.0140966	0.0146368	0.0162241	0.0127924	0.0159025	0.0176669	0.0203651	0.013636	0.0129956	0.0176784	0.0146453	0.0161262	0.0138753	0.0177623	0.0107488	0.0190896	0.0165143	0.0126109	0.0120009	0.0154093	1.28401	0.360653	0.000186402	1.48164	up
meta_610	LPC(0:0/15:0)	0.00171819	0.00160216	0.00163611	0.00145923	0.00169817	0.00241957	0.00146179	0.00177466	0.00447768	0.00205914	0.00166093	0.00246037	0.0017914	0.00272192	0.00234882	0.00183405	0.00158849	0.00103396	0.00341384	0.00264534	0.0026303	0.00275442	0.00347999	0.00274766	0.002482	0.00248458	0.00528725	0.00244734	0.00230431	0.00507562	0.0020303	0.00229163	0.00194973	0.00270123	0.00213676	0.00547791	0.00305621	0.00254614	0.00209029	0.00299352	1.43211	0.51814	0.0076664	1.12142	up
meta_612	LPC(O-16:1/0:0)	0.00281045	0.00299605	0.0020748	0.00259997	0.00201471	0.00224007	0.00158989	0.00229206	0.00279519	0.00245535	0.00218057	0.00209528	0.00268959	0.00237357	0.00204757	0.00242954	0.002267	0.00178195	0.00455506	0.00228384	0.00288057	0.00234487	0.00423427	0.00265225	0.00411033	0.00520974	0.00299308	0.00271036	0.0027042	0.00486901	0.00342198	0.00276913	0.00394839	0.00496169	0.00360532	0.00330859	0.00300061	0.00271162	0.00242863	0.00346867	1.42824	0.514241	0.00024956	1.56201	up
meta_613	LPC(18:4/0:0)	3.47713e-06	3.31127e-06	2.59261e-06	2.62857e-06	2.71571e-06	3.06898e-06	1.58029e-06	2.56685e-06	4.95517e-06	2.67119e-06	2.49917e-06	5.24226e-06	3.40933e-06	2.82606e-06	3.07728e-06	2.71487e-06	1.42096e-06	1.55217e-06	6.08799e-06	1.9717e-06	3.74301e-06	4.10273e-06	4.93418e-06	2.7206e-06	5.14817e-06	5.34552e-06	6.5216e-06	3.93523e-06	2.46636e-06	1.03512e-05	3.28283e-06	2.72453e-06	4.12616e-06	4.81272e-06	5.08441e-06	6.73152e-06	3.69671e-06	3.82004e-06	3.01848e-06	4.64153e-06	1.5377	0.620778	0.00379034	1.26379	up
meta_615	LPC(0:0/18:0)	0.0730545	0.0725401	0.0783299	0.0745215	0.0677863	0.070545	0.0720955	0.0712509	0.0640376	0.0673214	0.0666062	0.060926	0.0727171	0.0734025	0.0736398	0.0707846	0.0677998	0.0705815	0.070529	0.0714386	0.0656709	0.0636047	0.0640331	0.0658974	0.0668397	0.0653681	0.061735	0.0683428	0.0659149	0.0625067	0.0693634	0.0677056	0.0679973	0.0647247	0.0688675	0.0662869	0.0656095	0.066172	0.0704954	0.0659245	0.93516	-0.0967149	8.1752e-05	1.55087	down
meta_618	Methyldopa	4.04402e-05	4.48228e-05	2.47409e-05	1.83397e-05	3.47314e-05	3.90311e-05	4.01593e-05	2.97222e-05	2.801e-05	2.98983e-05	3.2635e-05	3.28392e-05	2.22559e-05	5.65668e-05	2.98575e-05	3.17465e-05	3.7902e-05	2.99476e-05	1.83377e-05	4.41731e-05	2.55107e-05	1.97681e-05	4.48239e-05	2.0587e-05	4.19839e-05	2.70653e-05	2.94345e-05	2.73448e-05	2.49503e-05	2.82619e-05	1.96993e-05	2.63558e-05	2.44044e-05	2.91856e-05	2.56094e-05	2.24276e-05	2.32899e-05	1.88984e-05	3.33079e-05	2.66445e-05	0.799946	-0.322025	0.0169179	1.04057	down
meta_627	D-Glucosaminic acid	1.66893e-05	1.96681e-05	1.8095e-05	1.37141e-05	1.80806e-05	2.14143e-05	1.87215e-05	1.79862e-05	1.3363e-05	1.68236e-05	1.38855e-05	6.44658e-06	1.55904e-05	1.77371e-05	1.28976e-05	1.18941e-05	1.55452e-05	1.31447e-05	1.29939e-05	1.23416e-05	1.368e-05	1.31394e-05	8.19323e-06	1.28663e-05	1.03021e-05	6.04827e-06	7.70291e-06	9.70749e-06	5.01495e-06	1.03222e-05	1.00267e-05	8.72791e-06	9.46283e-06	8.36759e-06	1.00661e-05	9.59292e-06	6.98209e-06	7.89046e-06	1.53516e-05	9.33853e-06	0.608309	-0.717124	2.94382e-07	1.91019	down
meta_628	Leu-Ala	1.7752e-05	1.17124e-05	2.5593e-05	7.18475e-06	1.30483e-05	2.05605e-05	1.72003e-05	5.04182e-06	9.67171e-06	1.27078e-05	1.32498e-05	1.21662e-05	1.2186e-05	1.37909e-05	1.15477e-05	1.18193e-05	1.18888e-05	1.37026e-05	3.22895e-06	1.24116e-05	5.95016e-06	1.45091e-05	8.04963e-06	8.61454e-06	2.65774e-06	3.00054e-06	2.65051e-06	5.71078e-06	2.3614e-06	3.01584e-06	1.89708e-06	4.3948e-06	1.64751e-06	3.9326e-06	2.26423e-06	4.93606e-06	8.06079e-06	2.66578e-06	1.28232e-05	4.79551e-06	0.373971	-1.419	1.16403e-06	1.85286	down
meta_632	Leu-Phe	0.000384609	0.000298679	0.00318551	0.000575615	0.00147558	0.000546089	0.000252866	0.00113724	0.000708802	0.000585514	0.000426819	0.00113729	0.000792072	0.000646847	0.000611459	0.000583742	0.000476076	0.000186452	0.000335649	0.000606169	0.000687728	0.000251166	6.67173e-05	0.000879881	8.20699e-05	0.00014366	5.8134e-05	0.000244045	0.000102008	0.000173715	9.72549e-05	0.000144033	5.22913e-05	9.03917e-05	2.99721e-05	8.27788e-05	0.000154856	0.000349547	0.000747654	0.000205014	0.274209	-1.86665	0.00198524	1.271	down
meta_635	Stachydrine	0.00268006	0.000106155	0.00060058	0.00208171	0.00051622	0.00428074	0.00296988	0.000557436	0.00210451	0.00229792	0.0046461	0.000144015	0.00171176	0.000327336	0.00106819	0.00373487	0.000211142	0.000465029	0.00313367	0.00141382	0.000235305	0.00182254	0.000451097	0.000985933	0.000250117	0.000184036	0.000351311	0.00119887	0.00201369	0.0026844	0.000177193	0.000127773	5.50045e-05	7.87772e-05	0.000736283	0.000578244	0.000823303	8.63141e-05	0.00175256	0.000713344	0.40703	-1.29679	0.00875141	1.10625	down
meta_638	Gly-His	0.000146795	0.000160777	0.000166377	0.000146614	0.00013539	0.000142244	0.000173575	0.000135369	0.000133412	0.000137438	0.00014507	0.000121254	0.000158315	0.00019899	0.000135682	0.000207831	0.000174187	0.000198138	0.000132271	0.000168515	0.000112928	0.00010426	0.00013113	0.000121719	0.000143968	0.000106011	9.28359e-05	0.000130869	0.000105358	9.77833e-05	0.000127106	0.000108359	9.81133e-05	0.000104871	0.000142837	9.89036e-05	9.02088e-05	0.0001487	0.000155912	0.000114776	0.736155	-0.441919	1.26997e-06	1.82037	down
meta_640	Ile-Lys	1.02912e-05	8.24335e-06	7.42612e-06	9.09909e-06	8.36812e-06	1.16561e-05	1.18516e-05	9.32687e-06	9.79393e-06	6.16016e-06	1.02469e-05	1.09691e-05	9.09453e-06	1.01228e-05	1.07684e-05	9.90189e-06	1.04224e-05	1.01176e-05	4.13941e-06	7.08642e-06	7.68125e-06	5.24277e-06	1.00551e-05	3.12099e-06	7.42209e-06	8.49006e-06	7.628e-06	7.29711e-06	5.71835e-06	8.52758e-06	7.89874e-06	8.01616e-06	7.66188e-06	8.28745e-06	5.97283e-06	7.05488e-06	7.06112e-06	7.02132e-06	9.2543e-06	7.23098e-06	0.781365	-0.355932	0.000854697	1.42361	down
meta_644	Ser-Phe	2.9868e-06	5.09419e-06	2.49029e-05	8.46956e-06	7.2754e-06	6.23025e-06	4.30197e-06	4.6663e-06	6.91626e-06	6.31732e-06	6.41931e-06	8.42135e-06	8.99647e-06	5.62927e-06	2.68537e-06	3.52109e-06	3.27227e-06	3.34642e-06	3.16682e-06	5.66785e-06	6.24421e-06	3.66692e-06	2.44773e-06	7.44357e-06	1.73544e-06	1.72991e-06	2.27359e-06	1.5862e-06	3.8508e-07	1.57086e-06	1.38538e-06	8.19276e-06	6.23085e-07	3.92249e-06	1.10194e-06	2.75581e-06	3.30484e-06	2.47668e-06	6.41436e-06	2.93592e-06	0.45771	-1.12749	0.00685525	1.14181	down
meta_645	Tyr-Leu	6.11187e-06	8.39607e-06	2.83798e-05	1.17976e-05	1.86595e-05	1.20456e-05	6.33658e-06	9.0009e-06	1.05717e-05	1.27511e-05	9.12371e-06	9.8878e-06	1.94427e-05	7.38014e-06	8.31578e-06	1.23992e-05	1.02678e-05	4.17357e-06	4.29115e-06	1.02213e-05	7.76379e-06	5.20423e-06	4.72829e-06	8.35426e-06	2.52826e-06	3.03489e-06	1.56622e-06	3.68069e-06	3.34734e-06	1.64782e-06	4.40102e-06	5.29293e-06	2.59061e-06	3.1159e-06	6.41288e-06	3.73573e-06	2.93547e-06	4.80205e-06	1.09777e-05	4.17458e-06	0.380278	-1.39487	3.82954e-05	1.62364	down
meta_646	3-Hydroxyphenylurea	0.00175387	0.00186339	0.00230931	0.00217496	0.00157341	0.00183746	0.00175293	0.00195477	0.00177988	0.00180971	0.00204519	0.00168449	0.00164585	0.00195702	0.00176184	0.00166106	0.00201598	0.0024153	0.00175172	0.00190667	0.00159895	0.00156026	0.00156828	0.00175755	0.00172164	0.00157747	0.00140052	0.00175223	0.00157275	0.00162079	0.00177104	0.00170588	0.0011938	0.00152077	0.00180702	0.0014649	0.00158113	0.00162669	0.00188274	0.00160009	0.849874	-0.234678	4.97001e-05	1.64034	down
meta_648	Carnitine C9:1-OH	0.00193847	0.00116707	0.00164488	0.00204417	0.00198898	0.00140727	0.00111349	0.00142115	0.00146458	0.000981815	0.00228637	0.00252285	0.000990445	0.000757213	0.00197712	0.000811631	0.000659219	0.00173521	0.00106665	0.000504274	0.00156614	0.000699032	0.000824363	0.00210668	0.000697142	0.00100376	0.00121047	0.000608007	0.000916029	0.00146938	0.000853622	0.00134576	0.000961073	0.000582351	0.000444977	0.000635884	0.00206157	0.000331135	0.00142414	0.00101763	0.714558	-0.484877	0.0275195	1.00893	down
meta_662	Cyclopentylglycine	0.000207445	3.39395e-05	0.000120648	0.000183437	0.000142185	0.000500621	0.000238965	0.000107523	0.000212437	0.000196026	0.00035906	6.89811e-05	0.000169159	6.20493e-05	0.000148006	0.000319454	6.97718e-05	7.22692e-05	0.000262122	0.000144624	3.98137e-05	0.000164998	6.50002e-05	0.000121265	4.84219e-05	0.000105261	8.75274e-05	0.00012348	0.000188485	0.000217773	9.92526e-05	3.53684e-05	2.33491e-05	4.65424e-05	7.42721e-05	8.19941e-05	0.000107107	3.8337e-05	0.000180936	9.26805e-05	0.512228	-0.965143	0.00475008	1.19358	down
meta_664	Leu-Leu	0.000122359	0.000129433	0.000136934	5.80846e-05	0.000145361	0.000130703	0.00017918	0.000183361	9.557e-05	0.000157984	0.000118273	0.000122646	3.40758e-05	0.000158111	0.000213105	9.44603e-05	4.86679e-05	0.00024971	4.32619e-05	0.00015122	3.66377e-05	0.000239114	7.77247e-05	3.42856e-05	3.94826e-05	3.21173e-05	3.33777e-05	6.74418e-05	3.17443e-05	5.28016e-05	6.42917e-05	5.33624e-05	2.01025e-05	4.65977e-05	1.66367e-05	4.74349e-05	8.1867e-05	3.01065e-05	0.000128625	5.58404e-05	0.434134	-1.20379	0.000143565	1.52077	down
meta_668	2-Aminopurine	1.02925e-05	1.49444e-05	1.06979e-05	7.81997e-06	1.06673e-05	5.87068e-06	1.1033e-05	2.47055e-06	7.16481e-06	9.86834e-06	4.31196e-06	8.30221e-06	5.38882e-06	1.06687e-05	7.67066e-06	7.85623e-06	4.86135e-06	1.49712e-05	9.41121e-06	5.55114e-06	3.47475e-06	8.66938e-06	5.76079e-06	7.77083e-06	3.64675e-07	2.4825e-06	5.78835e-06	8.13414e-06	2.9054e-06	1.38773e-06	8.64802e-06	5.09377e-06	8.91829e-06	7.78638e-06	4.00335e-06	5.29446e-06	9.56871e-06	7.40616e-06	8.49115e-06	5.74765e-06	0.676899	-0.562988	0.00875639	1.102	down
meta_672	1-Methylpiperidine-2-carboxylic acid	0.000207445	3.39395e-05	0.000120648	0.000183437	0.000142185	0.000500621	0.000238965	0.000107523	0.000212437	0.000196026	0.00035906	6.89811e-05	0.000169159	6.20493e-05	0.000148006	0.000319454	6.97718e-05	7.22692e-05	0.000262122	0.000144624	3.98137e-05	0.000164998	6.50002e-05	0.000121265	4.84219e-05	0.000105261	8.75274e-05	0.00012348	0.000188485	0.000217773	9.92526e-05	3.53684e-05	2.33491e-05	4.65424e-05	7.42721e-05	8.19941e-05	0.000107107	3.8337e-05	0.000180936	9.26805e-05	0.512228	-0.965143	0.00475008	1.19358	down
meta_673	N-Formylglycine	0.00214478	0.00217469	0.00163239	0.00207534	0.00202744	0.00180811	0.00220376	0.00195036	0.00215913	0.00215951	0.00240743	0.00215553	0.00144452	0.00207653	0.00199484	0.00210836	0.00222774	0.00244049	0.00236979	0.00123895	0.00199631	0.0020556	0.00286861	0.00216942	0.00277213	0.00271394	0.00231546	0.00261973	0.00223131	0.00271212	0.00249738	0.0024265	0.00208477	0.0025744	0.00237857	0.00241614	0.00254876	0.00236278	0.00203998	0.00243022	1.19129	0.252528	0.000133832	1.50446	up
meta_678	3-Methyladipic acid	3.30967e-06	4.50236e-06	4.56718e-06	3.49066e-06	4.38481e-06	3.183e-06	1.98628e-06	5.8099e-06	4.22609e-06	5.08701e-06	5.10885e-06	3.28737e-06	3.42336e-06	3.96945e-06	2.06807e-06	4.68027e-06	1.66408e-06	6.36743e-06	2.98079e-06	4.49242e-06	2.6471e-06	3.33444e-06	2.89917e-06	3.02079e-06	2.53261e-06	2.82821e-06	2.47998e-06	3.09224e-06	3.73447e-06	3.59043e-06	3.59187e-06	1.8367e-07	2.33668e-06	3.77196e-06	4.0386e-06	4.38533e-06	3.76383e-06	2.25157e-06	3.92945e-06	3.02683e-06	0.770293	-0.37652	0.0156417	1.04427	down
meta_679	Pimelic acid	3.30967e-06	4.50236e-06	4.56718e-06	3.49066e-06	4.38481e-06	3.183e-06	1.98628e-06	5.8099e-06	4.22609e-06	5.08701e-06	5.10885e-06	3.28737e-06	3.42336e-06	3.96945e-06	2.06807e-06	4.68027e-06	1.66408e-06	6.36743e-06	2.98079e-06	4.49242e-06	2.6471e-06	3.33444e-06	2.89917e-06	3.02079e-06	2.53261e-06	2.82821e-06	2.47998e-06	3.09224e-06	3.73447e-06	3.59043e-06	3.59187e-06	1.8367e-07	2.33668e-06	3.77196e-06	4.0386e-06	4.38533e-06	3.76383e-06	2.25157e-06	3.92945e-06	3.02683e-06	0.770293	-0.37652	0.0156417	1.04427	down

## Sheet: A vs D
#ID	name	Ac20	Ac24	Ac30	Ac32	Ac37	Ac4	Ac51	Ac59	Ac61	Ac69	Ac71	Ac78	Ac79	Ac86	Ac87	Ac8	Ac92	Ax55	Ax81	Ax83	Dc206	Dc263	Dc292	Dc312	Dc335	Dc339	Dc341	Dc342	Dx102	Dx111	Dx20	Dx25	Dx49	Dx73	Dx76	Dx79	Dx84	Dx94	A_Mean	D_Mean	Fold_change	log2FC	Pvalue	VIP	regulated
meta_10	Hexanoyl Glycine	1.40688e-06	9.97045e-07	1.02125e-06	1.31789e-06	6.72717e-07	2.85589e-07	2.26824e-06	5.65052e-07	9.1981e-07	1.58577e-06	1.46569e-06	1.39286e-06	2.39307e-06	2.88954e-06	7.08674e-07	1.05614e-06	1.41271e-06	1.57721e-06	1.80567e-06	1.56614e-06	2.24708e-06	2.21812e-06	4.11644e-07	1.03748e-06	1.26637e-06	2.66439e-06	1.3802e-06	1.13915e-06	3.40147e-06	3.91076e-06	1.85682e-06	6.56452e-06	1.15573e-06	1.38879e-06	1.42501e-06	2.40543e-06	3.98711e-06	2.07478e-06	1.3654e-06	2.25194e-06	1.64929	0.721845	0.0266467	1.08184	up
meta_11	L-Asparagine Anhydrous	6.60144e-05	5.19174e-05	4.78459e-05	5.52399e-05	5.24649e-05	5.97723e-05	4.87595e-05	3.94218e-05	3.63667e-05	4.85862e-05	5.71294e-05	5.07928e-05	5.82915e-05	6.044e-05	7.22558e-05	6.3898e-05	6.5666e-05	5.26603e-05	4.08887e-05	6.13052e-05	4.2689e-05	5.58151e-05	3.45996e-05	5.20536e-05	5.13994e-05	4.12788e-05	4.74225e-05	4.57466e-05	4.53335e-05	4.61844e-05	5.71443e-05	4.96613e-05	4.20181e-05	4.57318e-05	3.91617e-05	4.95766e-05	5.44848e-05	4.17972e-05	5.44858e-05	4.67832e-05	0.858631	-0.219889	0.00465341	1.0466	down
meta_13	L-Glutamine	0.000372001	0.000405256	0.000382883	0.000376538	0.000478134	0.00052001	0.000338824	0.000298957	0.000314186	0.000425925	0.000405552	0.000390719	0.000357608	0.000381187	0.000421289	0.000458042	0.000420445	0.000444661	0.000309762	0.000414528	0.000319418	0.000322586	0.000270454	0.000282154	0.000386991	0.000255612	0.000339066	0.000251288	0.000335878	0.000250193	0.00044809	0.000387532	0.00030705	0.00039317	0.000267936	0.000408551	0.000241275	0.00027783	0.000395825	0.000319171	0.806342	-0.310536	0.000393763	1.5241	down
meta_14	L-Homocitrulline	4.17175e-06	8.06912e-06	3.02282e-06	5.42112e-06	6.91197e-06	5.46865e-06	1.05729e-05	6.66988e-06	7.69839e-06	9.32118e-06	5.01792e-06	8.57668e-06	7.34536e-06	7.93722e-06	7.90645e-06	8.0748e-06	4.4868e-06	3.48787e-06	1.35661e-05	1.56068e-05	1.76028e-05	1.04186e-05	1.22777e-05	8.4049e-06	8.43523e-06	4.97493e-06	5.20181e-06	7.67607e-06	7.12555e-06	2.20771e-05	3.09515e-05	4.44287e-06	6.59764e-06	1.09623e-05	1.58282e-05	8.16921e-06	1.71952e-05	1.65895e-05	7.46669e-06	1.19406e-05	1.59918	0.677337	0.0196854	1.06691	up
meta_18	N-Acetyl-L-Tyrosine	2.35059e-06	3.60536e-06	2.26396e-06	2.7519e-06	2.8051e-06	2.99249e-06	2.68238e-06	2.06592e-06	3.24446e-06	2.39316e-06	2.53916e-06	3.08044e-06	2.65364e-06	3.83973e-06	2.55108e-06	3.61426e-06	2.01304e-06	2.45688e-06	2.38012e-06	2.80495e-06	3.41429e-06	1.51753e-06	3.8863e-06	4.16962e-06	4.00338e-06	3.04209e-06	4.1e-06	3.25242e-06	4.94665e-06	2.80542e-06	3.94217e-06	2.18007e-06	3.70222e-06	4.42812e-06	5.50353e-06	3.56267e-06	5.46136e-06	3.76714e-06	2.75443e-06	3.76028e-06	1.36517	0.449085	0.000867895	1.32905	up
meta_21	N-Propionylglycine	0.000102313	9.67689e-05	8.50248e-05	9.3551e-05	0.000129818	8.79826e-05	0.000116759	7.54795e-05	9.2824e-05	0.00012018	0.00011384	0.000100858	9.06779e-05	8.63361e-05	9.03385e-05	0.000105144	9.51064e-05	0.000101208	0.000101524	8.07004e-05	0.000104397	0.000134192	0.000108753	0.000123862	0.000137041	9.63759e-05	0.000104457	0.000101427	0.00013139	0.000114934	0.000102295	9.6756e-05	7.63895e-05	0.00011806	9.81376e-05	0.000114557	0.000149808	0.000105595	9.83217e-05	0.000112135	1.14049	0.189653	0.0124256	1.10604	up
meta_24	S-(5-Adenosy)-L-Homocysteine	7.82358e-06	9.28825e-06	4.9272e-06	8.43175e-06	8.85176e-06	6.71089e-06	1.00078e-05	5.59935e-06	8.89091e-06	8.38334e-06	7.81812e-06	7.76857e-06	4.30679e-06	5.0154e-06	5.74333e-06	8.46739e-06	6.0122e-06	5.7218e-06	8.11018e-06	6.27231e-06	9.04814e-06	9.08462e-06	6.67287e-06	7.47516e-06	1.15507e-05	5.53684e-06	9.14635e-06	7.87474e-06	1.0967e-05	1.08326e-05	1.36176e-05	9.97536e-06	1.02823e-05	9.22124e-06	1.07613e-05	8.33639e-06	1.11099e-05	1.22385e-05	7.20755e-06	9.65176e-06	1.33912	0.421283	0.000292012	1.39919	up
meta_29	Taurochenodesoxycholic Acid	4.27763e-05	5.72984e-05	3.01836e-05	1.27869e-05	4.75199e-05	3.34881e-05	3.27426e-05	3.33744e-05	8.97703e-05	4.80615e-05	8.53273e-05	8.49679e-05	4.91898e-05	3.45576e-05	4.0348e-05	3.66187e-05	3.04125e-05	4.76488e-05	2.82527e-05	1.95718e-05	0.000106111	4.48603e-05	4.27129e-05	7.01979e-05	0.000126563	4.48326e-05	4.94577e-05	3.50637e-05	6.18569e-05	0.000173616	5.02156e-05	3.15178e-05	7.34329e-05	4.96515e-05	8.11489e-05	9.83615e-05	6.55913e-05	9.51971e-05	4.42449e-05	7.22438e-05	1.63282	0.707365	0.00835137	1.06388	up
meta_38	5-Methylcytosine	5.0323e-05	3.63809e-05	4.59677e-05	4.59888e-05	4.61611e-05	4.74487e-05	4.76066e-05	4.04377e-05	3.96493e-05	5.01821e-05	4.79675e-05	3.6442e-05	5.9481e-05	3.19952e-05	6.13406e-05	5.74933e-05	4.10063e-05	3.98128e-05	4.07148e-05	4.39255e-05	6.61362e-05	7.28893e-05	6.83802e-05	5.72169e-05	6.27877e-05	4.39374e-05	6.20974e-05	6.66402e-05	5.01125e-05	6.35844e-05	3.50775e-05	4.07487e-05	6.12039e-05	3.89853e-05	4.27592e-05	5.67962e-05	5.40507e-05	6.24486e-05	4.55162e-05	5.58807e-05	1.22771	0.295968	0.00282874	1.33379	up
meta_46	3,3',5-Triiodo-L-Thyronine	6.30676e-07	5.59864e-07	7.21213e-07	8.53651e-07	8.90711e-07	6.94556e-07	6.05665e-07	4.81186e-07	7.1997e-07	8.0388e-07	6.73682e-07	8.63397e-07	7.4142e-07	7.08097e-07	6.83001e-07	5.20943e-07	4.81664e-07	6.32357e-07	6.9798e-07	5.55114e-07	6.5008e-07	7.36302e-07	8.75528e-07	9.79654e-07	9.56124e-07	8.10539e-07	9.58314e-07	8.93237e-07	7.14822e-07	6.96072e-07	5.66598e-07	7.33032e-07	8.21325e-07	7.75856e-07	9.84176e-07	7.54998e-07	5.71457e-07	8.92994e-07	6.75951e-07	7.98395e-07	1.18114	0.240183	0.00537301	1.11682	up
meta_47	L-Thyroxine	3.9328e-05	4.82358e-05	7.17644e-05	5.19899e-05	5.00031e-05	3.7215e-05	4.1976e-05	4.81686e-05	4.34237e-05	4.6131e-05	5.21303e-05	3.7252e-05	4.36744e-05	3.98955e-05	4.40005e-05	5.21451e-05	5.0784e-05	4.93653e-05	4.46823e-05	3.47347e-05	4.22027e-05	8.38441e-05	4.57261e-05	5.49907e-05	6.60939e-05	5.93698e-05	5.8991e-05	6.17469e-05	3.96715e-05	4.72212e-05	5.16019e-05	4.25732e-05	4.7878e-05	4.16809e-05	4.86677e-05	5.9826e-05	6.25045e-05	6.26313e-05	4.6345e-05	5.42901e-05	1.17143	0.228276	0.0187501	1.03653	up
meta_49	α-Ketoglutaric Acid（α-KG）	8.55743e-06	1.40732e-05	2.37728e-06	6.274e-06	8.97786e-06	1.4477e-05	3.39552e-05	1.26545e-05	1.6579e-05	3.00184e-05	2.82438e-05	1.23642e-05	9.26493e-06	1.64201e-05	1.32315e-05	1.42579e-05	8.84419e-06	5.28682e-06	2.33929e-05	1.467e-05	1.85766e-05	1.83754e-05	2.7503e-05	2.12245e-05	2.99897e-05	6.19828e-06	2.27279e-05	1.54738e-05	1.75115e-05	3.03674e-05	7.19146e-05	2.80066e-05	3.06837e-05	5.48051e-05	8.528e-05	4.36403e-05	3.06778e-05	5.37403e-05	1.4696e-05	3.37054e-05	2.2935	1.19755	0.001446	1.28427	up
meta_51	Citramalic Acid	3.687e-06	1.03296e-06	8.17205e-07	2.20111e-06	6.08794e-06	3.06912e-06	4.26252e-06	2.63816e-06	2.64826e-06	2.25556e-06	7.60005e-06	4.91655e-06	2.21901e-06	2.95669e-06	2.88763e-06	1.9908e-06	5.91647e-06	5.00968e-06	3.21345e-06	2.75015e-06	2.47453e-06	3.61867e-06	5.0219e-06	4.34091e-06	3.87498e-06	2.72449e-06	5.99357e-06	5.67635e-06	4.53309e-06	5.06651e-06	8.21251e-06	7.16584e-06	6.92467e-06	6.62412e-06	8.65251e-06	3.73869e-06	8.28687e-06	5.78799e-06	3.40802e-06	5.48434e-06	1.60925	0.686387	0.00123382	1.38207	up
meta_52	1,5-Anhydro-D-Glucitol	1.24948e-05	1.50344e-05	1.9655e-05	7.59947e-06	1.39317e-05	4.85098e-06	8.33261e-06	1.39461e-05	3.0458e-05	1.27515e-05	1.58486e-05	1.21209e-05	1.07147e-05	6.92355e-06	1.06633e-05	1.12569e-05	1.78878e-05	3.54053e-05	1.07479e-05	2.34888e-05	1.9903e-05	9.9551e-05	2.4248e-05	5.17402e-05	7.46979e-06	3.03511e-05	2.43614e-05	2.18689e-05	3.70812e-05	2.19164e-05	9.65687e-06	8.57353e-06	4.60182e-05	3.94618e-05	1.4983e-05	1.18997e-05	5.13473e-05	2.55368e-05	1.47056e-05	3.03316e-05	2.06259	1.04445	0.0100823	1.31245	up
meta_54	D-Glucose	6.25546e-06	6.4367e-06	1.38632e-05	1.03347e-05	9.32401e-06	8.50954e-06	7.20271e-06	1.20775e-05	8.54024e-06	1.02797e-05	8.20535e-06	8.27368e-06	1.26057e-05	7.78254e-06	7.56111e-06	1.00102e-05	7.05732e-06	6.0217e-06	1.19639e-05	8.23989e-06	2.1048e-05	2.34732e-05	2.3965e-05	1.37461e-05	1.17388e-05	2.90795e-05	2.32932e-05	1.4982e-05	2.26832e-05	3.29476e-05	1.2963e-05	1.03242e-05	1.69139e-05	1.50042e-05	1.33053e-05	1.69571e-05	2.48177e-05	1.89934e-05	9.02725e-06	1.92353e-05	2.1308	1.0914	1.94952e-06	2.01978	up
meta_55	D-Mannose	6.25546e-06	6.4367e-06	1.38632e-05	1.03347e-05	9.32401e-06	8.50954e-06	7.20271e-06	1.20775e-05	8.54024e-06	1.02797e-05	8.20535e-06	8.27368e-06	1.26057e-05	7.78254e-06	7.56111e-06	1.00102e-05	7.05732e-06	6.0217e-06	1.19639e-05	8.23989e-06	2.1048e-05	2.34732e-05	2.3965e-05	1.37461e-05	1.17388e-05	2.90795e-05	2.32932e-05	1.4982e-05	2.26832e-05	3.29476e-05	1.2963e-05	1.03242e-05	1.69139e-05	1.50042e-05	1.33053e-05	1.69571e-05	2.48177e-05	1.89934e-05	9.02725e-06	1.92353e-05	2.1308	1.0914	1.94952e-06	2.01978	up
meta_59	L-Fucose	1.24948e-05	1.50344e-05	1.9655e-05	7.59947e-06	1.39317e-05	4.85098e-06	8.33261e-06	1.39461e-05	3.0458e-05	1.27515e-05	1.58486e-05	1.21209e-05	1.07147e-05	6.92355e-06	1.06633e-05	1.12569e-05	1.78878e-05	3.54053e-05	1.07479e-05	2.34888e-05	1.9903e-05	9.9551e-05	2.4248e-05	5.17402e-05	7.46979e-06	3.03511e-05	2.43614e-05	2.18689e-05	3.70812e-05	2.19164e-05	9.65687e-06	8.57353e-06	4.60182e-05	3.94618e-05	1.4983e-05	1.18997e-05	5.13473e-05	2.55368e-05	1.47056e-05	3.03316e-05	2.06259	1.04445	0.0100823	1.31245	up
meta_60	L-Rhamnose	1.24948e-05	1.50344e-05	1.9655e-05	7.59947e-06	1.39317e-05	4.85098e-06	8.33261e-06	1.39461e-05	3.0458e-05	1.27515e-05	1.58486e-05	1.21209e-05	1.07147e-05	6.92355e-06	1.06633e-05	1.12569e-05	1.78878e-05	3.54053e-05	1.07479e-05	2.34888e-05	1.9903e-05	9.9551e-05	2.4248e-05	5.17402e-05	7.46979e-06	3.03511e-05	2.43614e-05	2.18689e-05	3.70812e-05	2.19164e-05	9.65687e-06	8.57353e-06	4.60182e-05	3.94618e-05	1.4983e-05	1.18997e-05	5.13473e-05	2.55368e-05	1.47056e-05	3.03316e-05	2.06259	1.04445	0.0100823	1.31245	up
meta_62	D-Glucoronic Acid	5.16853e-06	8.52179e-06	6.44672e-06	6.26275e-06	9.09767e-06	7.47954e-06	1.59514e-06	8.90724e-06	4.25419e-06	6.6052e-06	3.44576e-06	1.03217e-05	7.34376e-06	4.95953e-06	5.37924e-06	6.73856e-06	5.59148e-06	6.22978e-06	6.58746e-06	5.15482e-06	1.89896e-05	1.77554e-05	1.62624e-05	1.52393e-05	1.02097e-05	1.98254e-05	1.48323e-05	1.1816e-05	1.95989e-05	2.76464e-05	1.15168e-05	8.07625e-06	1.40012e-05	1.35067e-05	1.33318e-05	1.35489e-05	2.85126e-05	2.22745e-05	6.30454e-06	1.64969e-05	2.61667	1.38773	3.09027e-07	2.13343	up
meta_63	D-Glyceric Acid	3.11719e-06	5.27403e-06	7.40768e-07	2.28975e-06	2.88992e-06	2.49774e-06	1.73459e-06	2.09401e-06	3.01213e-06	3.22901e-06	1.97182e-06	3.32182e-06	2.22208e-06	1.50132e-06	2.16385e-06	1.95974e-06	1.51658e-06	3.18463e-06	3.23979e-06	2.87577e-06	4.48078e-06	7.65964e-06	6.30149e-06	5.36184e-06	2.33278e-06	6.52323e-06	5.20523e-06	8.47172e-06	3.7446e-06	6.87039e-06	2.11362e-06	1.40745e-06	3.77002e-06	4.49805e-06	3.23867e-06	2.64646e-06	7.59446e-06	5.55185e-06	2.54183e-06	4.87624e-06	1.9184	0.939903	0.000230857	1.66853	up
meta_71	2-Hydroxybutanoic Acid	0.000446287	0.000771373	0.000698014	0.000317027	0.00058486	0.000200073	0.00048103	0.000644316	0.00148892	0.000439982	0.000595993	0.00043397	0.000457905	0.000313604	0.000463423	0.000499666	0.000733599	0.00177816	0.000364032	0.000992504	0.000837261	0.00642651	0.000922889	0.00306045	0.00030254	0.00139134	0.00115993	0.000780838	0.00165691	0.000951196	0.000499644	0.000336881	0.00222221	0.00167159	0.000578331	0.000543859	0.00273554	0.00115912	0.000635237	0.00151317	2.38205	1.25221	0.0228315	1.19431	up
meta_76	3-Hydroxy-3-Methyl Butyric Acid	0.000103501	0.00014231	9.58955e-05	5.17555e-05	0.000123914	0.000136309	7.59269e-05	0.00011497	0.000103489	0.000133286	9.80265e-05	0.000134051	8.31677e-05	8.33536e-05	8.13374e-05	7.79295e-05	8.84742e-05	0.000108409	0.000106812	0.00013522	0.00017725	0.00011019	0.00019424	0.000163142	9.96328e-05	0.000339024	0.00014401	0.000162288	0.00010309	0.00016808	0.000108469	7.40418e-05	9.40172e-05	0.000136478	0.000139045	0.00010965	0.000307805	9.78926e-05	0.000103907	0.000151575	1.45875	0.544737	0.0133465	1.13868	up
meta_77	3-Hydroxybutyrate	0.000446287	0.000771373	0.000698014	0.000317027	0.00058486	0.000200073	0.00048103	0.000644316	0.00148892	0.000439982	0.000595993	0.00043397	0.000457905	0.000313604	0.000463423	0.000499666	0.000733599	0.00177816	0.000364032	0.000992504	0.000837261	0.00642651	0.000922889	0.00306045	0.00030254	0.00139134	0.00115993	0.000780838	0.00165691	0.000951196	0.000499644	0.000336881	0.00222221	0.00167159	0.000578331	0.000543859	0.00273554	0.00115912	0.000635237	0.00151317	2.38205	1.25221	0.0228315	1.19431	up
meta_80	4-Hydroxy-2-Oxoglutaric Acid	6.048e-06	2.0015e-05	8.06126e-06	8.70944e-06	8.66147e-06	6.30264e-06	1.11406e-05	1.41359e-05	1.49462e-05	1.35914e-05	1.10484e-05	1.08633e-05	1.12829e-05	1.11026e-05	6.44996e-06	9.51787e-06	8.52772e-06	1.25861e-05	1.02269e-05	1.65148e-05	1.88146e-05	1.37052e-05	2.28754e-05	1.55676e-05	9.30563e-06	1.31527e-05	1.3996e-05	2.16722e-05	2.01879e-05	1.54055e-05	6.88633e-06	8.29807e-06	1.24269e-05	2.08943e-05	2.14603e-05	1.78451e-05	1.65474e-05	2.0664e-05	1.09866e-05	1.60947e-05	1.46494	0.55084	0.000936784	1.30293	up
meta_81	Adipic Acid	1.29616e-05	1.20919e-05	1.35079e-05	1.26158e-05	2.10918e-05	7.37413e-06	1.94843e-05	1.40429e-05	8.19914e-06	1.04124e-05	1.50839e-05	1.70128e-05	7.33922e-06	1.0508e-05	7.75955e-06	1.05789e-05	1.15101e-05	1.79971e-05	7.71847e-06	7.11844e-06	1.4734e-05	4.00172e-05	1.23992e-05	2.63446e-05	1.7587e-05	1.73442e-05	2.49714e-05	1.11276e-05	1.52188e-05	2.04077e-05	2.19763e-05	1.47665e-05	1.73818e-05	2.18003e-05	1.28386e-05	1.70534e-05	1.71308e-05	1.27177e-05	1.22204e-05	1.86565e-05	1.52666	0.610383	0.00184875	1.31564	up
meta_82	Azelaic Acid	0.000129477	0.000118335	0.000124518	0.000125912	0.000254874	0.000139614	0.000131768	0.000144306	0.000168661	0.000136237	0.000176794	0.00015446	0.000144331	0.000135208	0.000142707	0.000166817	0.000155408	0.000184524	0.000148063	0.000135943	0.000174278	0.000167298	0.000171061	0.000159835	0.0002844	0.000171059	0.000222786	0.000142241	0.000201892	0.000196119	0.000177131	0.00016306	0.000183509	0.000176046	0.000185969	0.000148583	0.000201437	0.000264178	0.000150898	0.000188382	1.24841	0.320091	0.00180158	1.36114	up
meta_85	Dodecanedioic Aicd	1.23554e-06	1.43836e-06	8.90058e-07	1.18586e-06	1.29774e-06	1.23173e-06	1.13342e-06	2.51907e-06	1.24025e-06	9.20988e-07	1.59594e-06	1.13245e-06	7.64218e-07	1.05783e-06	1.06995e-06	8.28394e-07	1.38305e-06	1.19454e-06	1.64006e-06	2.22508e-06	1.63009e-06	5.56773e-06	9.86683e-07	3.08094e-06	1.32479e-06	9.30401e-06	3.34082e-06	1.59282e-06	2.14026e-06	1.34815e-06	3.07086e-06	1.34233e-06	2.6968e-06	1.93237e-06	1.1306e-06	1.42387e-06	9.99051e-07	1.75155e-06	1.29923e-06	2.48132e-06	1.90984	0.933455	0.0271689	1.0488	up
meta_91	L-Homoserine	0.000117946	0.000156147	9.29838e-05	0.00011402	0.000132596	0.000103098	0.000147053	8.31662e-05	9.25018e-05	0.000117355	0.000131695	0.000160831	0.000108815	0.000144529	0.000116662	0.000141026	0.000164702	0.000171183	0.000102762	0.000127536	8.68381e-05	6.96463e-05	5.63964e-05	7.24279e-05	9.68564e-05	5.00041e-05	0.000104447	8.08117e-05	5.86688e-05	3.09346e-05	0.000152314	8.01005e-05	8.03232e-05	9.66432e-05	9.53398e-05	0.00010013	7.71456e-05	7.3293e-05	0.00012633	8.124e-05	0.643076	-0.63694	5.2376e-06	1.77656	down
meta_92	Malonicacid	0.000446287	0.000771373	0.000698014	0.000317027	0.00058486	0.000200073	0.00048103	0.000644316	0.00148892	0.000439982	0.000595993	0.00043397	0.000457905	0.000313604	0.000463423	0.000499666	0.000733599	0.00177816	0.000364032	0.000992504	0.000837261	0.00642651	0.000922889	0.00306045	0.00030254	0.00139134	0.00115993	0.000780838	0.00165691	0.000951196	0.000499644	0.000336881	0.00222221	0.00167159	0.000578331	0.000543859	0.00273554	0.00115912	0.000635237	0.00151317	2.38205	1.25221	0.0228315	1.19431	up
meta_98	Subericacid	1.04746e-05	9.06563e-06	8.76183e-06	9.95359e-06	1.00347e-05	7.10276e-06	1.08582e-05	8.16062e-06	1.61623e-05	8.89758e-06	1.14568e-05	1.13592e-05	7.56487e-06	7.62968e-06	8.38125e-06	1.05607e-05	1.09516e-05	1.22711e-05	8.57852e-06	1.08973e-05	1.49552e-05	2.47847e-05	9.99612e-06	1.3545e-05	1.56382e-05	1.78907e-05	1.73959e-05	1.11071e-05	1.32289e-05	1.29329e-05	1.3621e-05	8.18506e-06	1.27595e-05	1.70885e-05	1.05944e-05	1.04056e-05	1.75088e-05	1.49101e-05	9.95614e-06	1.42527e-05	1.43154	0.517573	0.000287987	1.56998	up
meta_101	LPS(22:6/0:0)	5.56935e-06	3.98643e-06	4.08461e-06	4.71421e-06	3.94552e-06	4.82347e-06	2.60931e-06	4.19345e-06	7.44402e-06	4.54484e-06	4.05322e-06	5.072e-06	4.15568e-06	4.9035e-06	3.15608e-06	5.17242e-06	2.95684e-06	3.17461e-06	6.83133e-06	3.55567e-06	6.07112e-06	5.32505e-06	5.11079e-06	5.34728e-06	6.02863e-06	6.02167e-06	3.27774e-06	4.54155e-06	4.45456e-06	4.90253e-06	5.37966e-06	1.11667e-05	8.23957e-06	7.53355e-06	6.72999e-06	9.41819e-06	5.81838e-06	5.0304e-06	4.44733e-06	6.13319e-06	1.37907	0.463699	0.00332665	1.14723	up
meta_102	LPG(18:1/0:0)	7.44917e-05	5.00225e-05	5.46226e-05	6.01867e-05	5.31189e-05	5.34051e-05	5.89376e-05	4.5722e-05	5.76964e-05	5.12708e-05	4.80039e-05	5.55884e-05	6.66303e-05	5.99345e-05	5.65765e-05	5.26574e-05	4.79164e-05	4.70326e-05	8.2158e-05	4.81033e-05	7.31488e-05	5.32375e-05	7.16805e-05	4.94893e-05	7.46205e-05	6.14959e-05	5.91978e-05	5.07009e-05	5.80063e-05	5.24247e-05	6.83926e-05	9.61071e-05	7.79436e-05	7.38602e-05	6.26163e-05	7.85138e-05	5.96067e-05	8.03133e-05	5.62038e-05	6.6742e-05	1.1875	0.247928	0.00646596	1.10647	up
meta_103	LPE(18:1/0:0)	0.000804945	0.000688233	0.000233504	0.000890027	0.00101164	0.000794028	0.000425001	0.000566111	0.00120782	0.0010889	0.000743008	0.00162609	0.000699302	0.000357695	0.000615105	0.000606325	0.000933094	0.000621308	0.00132599	0.000254151	0.00159548	0.00148568	0.00156826	0.000823237	0.00143448	0.00231535	0.00111406	0.000914531	0.00146767	0.00291206	0.00151079	0.00282293	0.00132952	0.00124274	0.00132574	0.0029977	0.00110509	0.00146461	0.000774614	0.001635	2.11073	1.07774	4.92866e-05	1.6326	up
meta_104	LPE(18:0/0:0)	0.00109762	0.000657741	0.000661417	0.00128997	0.0010581	0.0010981	0.00114419	0.000754398	0.00127671	0.0011671	0.00110369	0.0011244	0.000832612	0.00087886	0.00117869	0.000851151	0.00115375	0.000643831	0.00204198	0.000601052	0.00196084	0.00102104	0.00190076	0.0013118	0.00204274	0.00254458	0.00122798	0.00119454	0.00170428	0.00272411	0.00156954	0.00397707	0.00197162	0.00125475	0.00130266	0.00340274	0.00133334	0.00205313	0.00103077	0.00191653	1.85932	0.894775	0.000253752	1.53447	up
meta_105	LPE(16:0/0:0)	0.00519456	0.00391823	0.00311696	0.00652053	0.00527919	0.00489939	0.00407853	0.00386984	0.00680869	0.00561637	0.00505049	0.00685021	0.00380596	0.00392743	0.00548483	0.00431033	0.0052006	0.00283039	0.0102312	0.00390099	0.00986363	0.00632721	0.0115412	0.00825989	0.00972382	0.0133936	0.00810584	0.0075342	0.0127248	0.0130849	0.0109012	0.0194831	0.00913771	0.00744617	0.00891614	0.02085	0.00792478	0.0131006	0.00504473	0.0110177	2.184	1.12697	5.60836e-06	1.82133	up
meta_106	LPE(14:0/0:0)	9.30473e-06	9.95207e-06	8.68629e-06	1.41735e-05	1.71761e-05	1.58021e-05	9.79091e-06	1.60528e-05	1.17155e-05	1.52061e-05	1.18461e-05	2.59965e-05	7.99964e-06	1.26451e-05	1.90053e-05	9.68942e-06	1.02056e-05	5.8247e-06	4.25258e-05	1.05759e-05	3.20614e-05	7.82965e-06	5.26386e-05	1.75458e-05	2.90286e-05	7.48502e-05	1.9074e-05	1.63563e-05	3.53763e-05	3.14029e-05	4.41982e-05	5.17994e-05	1.92017e-05	1.59411e-05	2.53001e-05	7.38393e-05	1.15383e-05	3.39048e-05	1.42087e-05	3.28826e-05	2.31426	1.21055	0.00114916	1.34122	up
meta_107	LPA(0:0/18:0)	0.000110688	6.20951e-05	6.13592e-05	9.22459e-05	6.53325e-05	7.25305e-05	8.16914e-05	7.05128e-05	9.32201e-05	7.40732e-05	7.20417e-05	7.99452e-05	8.63345e-05	8.00467e-05	9.49342e-05	8.00775e-05	6.43322e-05	6.94174e-05	0.000206214	5.98989e-05	0.000123603	8.88354e-05	0.000157431	8.16685e-05	0.000131868	9.97623e-05	0.000100397	9.13132e-05	0.000109278	9.56534e-05	0.000108697	0.000273482	0.000186208	0.00014951	0.0001354	0.000177205	7.89643e-05	0.000166921	8.38495e-05	0.0001309	1.56113	0.642588	0.00161555	1.32193	up
meta_108	LPA(0:0/16:0)	0.000245889	0.000253738	0.000217458	0.000251378	0.000295706	0.000245118	0.000286158	0.000243556	0.000344686	0.000301195	0.000277804	0.000274213	0.000315154	0.000246568	0.000236171	0.000259717	0.000247185	0.000199489	0.000621516	0.000299924	0.000424047	0.000350415	0.000579366	0.000416037	0.000407026	0.000516384	0.000361159	0.000397935	0.000499833	0.000579842	0.00032228	0.000886419	0.000546181	0.000731028	0.000412632	0.000665778	0.000349341	0.000722194	0.000283131	0.000509328	1.79891	0.847123	1.3285e-05	1.80115	up
meta_111	FFA(16:1)	0.00655002	0.0045467	0.00737378	0.00365099	0.00369666	0.00435158	0.00439266	0.0042655	0.00671445	0.00443908	0.00690571	0.00929725	0.00493081	0.00562729	0.00560712	0.00603248	0.00322521	0.00553724	0.00485212	0.0055896	0.00954652	0.0118789	0.00668249	0.0173804	0.00446895	0.0201906	0.00859544	0.0104202	0.0139344	0.0127389	0.00719599	0.0136508	0.0120973	0.0114822	0.00429598	0.0069721	0.00747888	0.0167559	0.00537931	0.0108759	2.0218	1.01564	6.53725e-05	1.80961	up
meta_112	FFA(16:0)	0.00113	0.0010594	0.00144351	0.00154299	0.00144758	0.00144121	0.00169514	0.00155279	0.00162592	0.00157525	0.00211329	0.00180883	0.00172929	0.00187998	0.00175847	0.0015866	0.00151511	0.00177118	0.00160754	0.00209501	0.00250579	0.00277574	0.00264258	0.0032041	0.00200002	0.0025693	0.00246039	0.0028016	0.00287745	0.00273165	0.00235135	0.00232481	0.00247519	0.0023507	0.00173229	0.00157689	0.00249944	0.00312018	0.00161895	0.00249997	1.54419	0.62685	2.76754e-08	2.20249	up
meta_113	FFA(18:2)	0.00172555	0.00155717	0.00180653	0.00203021	0.00171694	0.002072	0.00291558	0.00204784	0.00241605	0.00183453	0.00245458	0.00253495	0.00229881	0.00209922	0.00209136	0.00214116	0.00199966	0.00213497	0.00227728	0.00227196	0.00339757	0.00410076	0.00278945	0.00388295	0.00238871	0.00415159	0.00297856	0.00350401	0.00282995	0.00363495	0.0021699	0.00285262	0.00326552	0.00342722	0.00170038	0.00219374	0.0029248	0.00419761	0.00212132	0.00313279	1.47682	0.56249	1.61131e-05	1.91904	up
meta_116	DHA	0.000434099	0.000242053	0.000569425	0.00039665	0.000309335	0.000361989	0.000376031	0.000378809	0.00072335	0.00034199	0.00038819	0.000546006	0.000363293	0.000283367	0.000486094	0.000759601	0.000263861	0.00062228	0.000554857	0.000499603	0.00041791	0.000573982	0.000463567	0.00127009	0.000239899	0.00071995	0.000723582	0.00083063	0.00101977	0.000531081	0.000447706	0.00061089	0.000835961	0.000593102	0.000496074	0.000468106	0.00035371	0.00121559	0.000445044	0.0006562	1.47446	0.560186	0.00926983	1.28918	up
meta_117	FFA(20:2)	6.3385e-07	7.29588e-07	9.60903e-07	8.26288e-07	8.63667e-07	1.04201e-06	8.64107e-07	8.04212e-07	1.33945e-06	8.01843e-07	1.42003e-06	1.0852e-06	8.75461e-07	1.03195e-06	1.01011e-06	9.32658e-07	7.56216e-07	1.06166e-06	1.00885e-06	8.15125e-07	2.11071e-06	3.66819e-06	1.3229e-06	3.43376e-06	9.82059e-07	5.63358e-06	2.30641e-06	2.48503e-06	1.68401e-06	2.89797e-06	8.84829e-07	1.80346e-06	2.65134e-06	1.91479e-06	1.12011e-06	1.2295e-06	1.65023e-06	2.91721e-06	9.43158e-07	2.26089e-06	2.39715	1.26132	0.000187695	1.75633	up
meta_118	FFA(10:0)	4.27446e-07	5.39493e-07	1.12242e-06	5.0964e-07	3.89232e-07	3.37717e-07	6.43688e-07	4.72555e-07	1.12072e-06	3.72626e-07	8.47193e-07	4.97866e-07	4.70999e-07	6.12287e-07	5.55162e-07	8.22516e-07	4.88591e-07	7.71137e-07	6.45399e-07	8.56722e-07	9.02846e-07	7.97003e-07	6.77922e-07	1.41373e-06	4.89555e-07	4.24439e-06	1.27065e-06	9.36255e-07	1.12693e-06	8.68416e-07	8.98939e-07	5.2951e-07	5.45689e-07	9.5205e-07	9.03459e-07	1.16019e-06	1.51259e-06	1.83464e-06	6.2517e-07	1.17026e-06	1.87191	0.904514	0.0156741	1.1433	up
meta_119	AA	0.000252237	0.000175214	0.000198349	0.00025917	0.00022708	0.000252879	0.000224612	0.000233161	0.000276757	0.000277385	0.000297665	0.000242247	0.000286569	0.000238712	0.000316545	0.000198253	0.000241288	0.000212617	0.000234975	0.000269502	0.000207366	0.000316776	0.000313666	0.000442273	0.000265299	0.000234718	0.000267254	0.000370559	0.000371547	0.000381981	0.000370348	0.000370664	0.000306199	0.000367327	0.000270219	0.000317972	0.000332401	0.000523613	0.000245761	0.00033501	1.36315	0.446949	0.000128345	1.77763	up
meta_122	Uridine 5-Monophosphate	3.55306e-06	2.60611e-06	5.14268e-06	2.99409e-06	3.07379e-06	4.50257e-06	4.17853e-06	2.78549e-06	5.79266e-06	4.63968e-06	5.26342e-06	5.91443e-06	5.25262e-06	3.49778e-06	4.93681e-06	2.37714e-06	2.49111e-06	5.26891e-06	2.54837e-06	4.00844e-06	6.72722e-06	3.85432e-06	8.0316e-06	6.1177e-06	5.35004e-06	5.00764e-06	5.34031e-06	6.25975e-06	4.39237e-06	6.97814e-06	4.55749e-06	5.16629e-06	7.01666e-06	5.51306e-06	9.53007e-06	5.80115e-06	7.87014e-06	8.01844e-06	4.04138e-06	6.19624e-06	1.5332	0.616544	2.85215e-05	1.62045	up
meta_123	N6-Succinyl Adenosine	6.42674e-07	1.00118e-06	9.88534e-07	1.26892e-06	1.10798e-06	1.5637e-06	2.11554e-06	7.76276e-07	1.18949e-06	2.33461e-06	1.45164e-06	9.70988e-07	9.05361e-07	1.13854e-06	8.68353e-07	5.64947e-07	1.03578e-06	9.17491e-07	8.72888e-07	8.54856e-07	1.99686e-06	3.73708e-06	1.03343e-06	2.24499e-06	2.64739e-06	5.89983e-07	2.07165e-06	1.36169e-06	3.69102e-06	1.85454e-06	4.80949e-06	1.8389e-06	1.87537e-06	2.38461e-06	1.58294e-06	2.77457e-06	2.0686e-06	2.66768e-06	1.12849e-06	2.2906e-06	2.0298	1.02133	0.000171137	1.5208	up
meta_125	2-(Dimethylamino)Guanosine	1.06565e-05	1.13107e-05	1.22598e-05	1.18126e-05	9.72604e-06	1.06604e-05	1.81349e-05	9.14043e-06	1.32419e-05	1.16177e-05	1.44664e-05	1.34396e-05	8.27921e-06	1.0478e-05	9.84608e-06	1.24609e-05	1.02577e-05	1.24043e-05	1.11614e-05	9.23903e-06	1.58969e-05	1.41133e-05	1.03097e-05	1.16681e-05	1.81209e-05	8.80144e-06	1.6292e-05	1.23153e-05	1.77673e-05	1.34111e-05	2.63259e-05	1.29229e-05	1.34215e-05	1.48557e-05	1.37948e-05	1.40801e-05	2.23472e-05	2.9301e-05	1.15297e-05	1.58747e-05	1.37686	0.461379	0.00396039	1.26453	up
meta_127	Β-Pseudouridine	0.000162766	0.000205027	0.000181798	0.000176376	0.000174883	0.000195078	0.000228935	0.000179112	0.000176522	0.000204579	0.000199979	0.000180364	0.000159996	0.000176868	0.00019162	0.00023188	0.00021795	0.000194936	0.000157074	0.000196329	0.000205488	0.000187796	0.000162336	0.000177111	0.000244424	0.000160498	0.000255664	0.000209836	0.000253571	0.000257026	0.000475638	0.000183997	0.000193692	0.000211975	0.000183434	0.00018818	0.000347917	0.000395159	0.000189604	0.000238541	1.25811	0.331252	0.0293548	1.04788	up
meta_132	D-Fructose 6-Phosphate-Disodium Salt	1.52432e-06	3.20342e-06	4.46546e-06	2.58127e-06	3.09858e-06	2.53909e-06	1.75177e-06	1.74319e-06	2.66764e-06	3.16601e-06	1.70552e-06	3.78878e-06	2.07389e-06	3.72585e-06	5.42743e-06	2.6632e-06	2.14053e-06	1.96104e-06	3.02629e-06	1.62154e-06	1.36649e-05	9.05641e-06	6.90219e-06	6.74003e-06	4.78222e-06	1.0357e-05	6.85437e-06	6.77388e-06	2.64261e-05	1.48482e-05	8.3322e-06	4.69881e-06	6.15628e-06	5.69549e-06	1.19454e-05	9.9527e-06	4.09187e-06	8.4145e-06	2.74374e-06	9.20515e-06	3.35496	1.7463	6.83402e-05	1.67327	up
meta_134	3-Methyl-2-Oxobutanoic Acid	2.18554e-06	3.08578e-06	2.58116e-06	1.85294e-06	2.75015e-06	3.36335e-06	2.42997e-06	2.43188e-06	4.14275e-06	3.41153e-06	3.02205e-06	2.25171e-06	1.98548e-06	2.67837e-06	2.9506e-06	2.50602e-06	2.39332e-06	3.15883e-06	3.15535e-06	2.65243e-06	2.29918e-06	4.2132e-06	5.48259e-06	5.20154e-06	4.04997e-06	5.14786e-06	3.01739e-06	5.05554e-06	2.8297e-06	3.75741e-06	2.5884e-06	3.26395e-06	2.74745e-06	3.54059e-06	3.72216e-06	3.63143e-06	3.95534e-06	4.11039e-06	2.74946e-06	3.81189e-06	1.38642	0.471359	0.000292335	1.5571	up
meta_135	8,15-Dihete	9.29e-05	6.6348e-05	0.000110954	4.51214e-05	6.43583e-05	5.7633e-05	4.66124e-05	6.14675e-05	8.45375e-05	3.53901e-05	9.17991e-05	0.000104737	5.44567e-05	6.29339e-05	7.41963e-05	8.19991e-05	2.72655e-05	5.58201e-05	7.05857e-05	5.22828e-05	0.000103463	0.000137676	5.3364e-05	0.000174372	3.32158e-05	0.000232981	6.99748e-05	9.99859e-05	0.00016355	0.000131071	6.99326e-05	0.00013148	0.000101909	0.000109259	4.03701e-05	6.09542e-05	6.57625e-05	0.000175968	6.70699e-05	0.000108627	1.61961	0.695647	0.00607071	1.31377	up
meta_137	Ribulose-5-Phosphate	1.76021e-05	1.52274e-05	2.20953e-05	1.96231e-05	1.81047e-05	2.06311e-05	1.75788e-05	2.02181e-05	1.94437e-05	1.57444e-05	1.46975e-05	2.08848e-05	2.08003e-05	2.25436e-05	1.84239e-05	1.9117e-05	2.78552e-05	1.6059e-05	2.65311e-05	2.89343e-05	2.02799e-05	2.11856e-05	2.50298e-05	1.75927e-05	2.82371e-05	2.00422e-05	2.08444e-05	2.08229e-05	1.93405e-05	2.44014e-05	2.68791e-05	2.643e-05	3.15531e-05	2.83896e-05	3.05475e-05	2.64408e-05	2.42097e-05	3.13232e-05	2.01058e-05	2.46416e-05	1.2256	0.293489	0.00205658	1.31766	up
meta_139	2-Deoxyribose 1-Phosphate	2.60325e-05	4.2667e-05	5.4862e-05	4.48327e-05	5.1173e-05	4.68193e-05	3.35243e-05	4.02657e-05	4.27733e-05	4.15417e-05	5.07062e-05	4.91458e-05	4.08422e-05	4.07222e-05	3.25713e-05	3.61818e-05	5.64486e-05	3.95715e-05	4.39273e-05	3.43451e-05	5.35378e-05	5.59736e-05	4.73419e-05	5.43983e-05	5.39515e-05	4.3263e-05	4.82423e-05	6.37779e-05	5.96213e-05	5.33861e-05	5.24131e-05	4.81074e-05	4.29832e-05	6.55456e-05	6.56727e-05	4.63802e-05	6.59268e-05	5.73493e-05	4.24477e-05	5.43262e-05	1.27984	0.355963	2.84868e-05	1.59527	up
meta_140	N-Acetylglucosamine 1-Phosphate	2.24077e-05	3.51511e-05	3.40159e-05	2.6943e-05	3.19239e-05	2.28903e-05	2.81587e-05	2.15591e-05	2.58321e-05	2.61575e-05	3.17365e-05	2.944e-05	1.99498e-05	1.87724e-05	2.14159e-05	3.58175e-05	3.68976e-05	2.63294e-05	2.25951e-05	1.55983e-05	3.76692e-05	2.68774e-05	2.73202e-05	3.37218e-05	3.71814e-05	2.04695e-05	3.3249e-05	3.58381e-05	3.45707e-05	5.22777e-05	6.8162e-05	1.84548e-05	2.83706e-05	2.14451e-05	2.59144e-05	3.40399e-05	4.53285e-05	5.38917e-05	2.66796e-05	3.52657e-05	1.32182	0.402528	0.0162547	1.05936	up
meta_143	Hydroxyphenyllactic acid	2.50879e-06	6.31632e-06	1.19322e-06	2.59536e-06	4.05796e-06	3.15929e-06	2.82096e-06	1.34092e-06	3.5726e-06	4.76473e-06	4.70676e-06	3.21502e-06	3.14438e-06	3.21566e-06	2.13544e-06	2.86523e-06	3.17845e-06	4.2704e-06	3.51403e-06	1.48308e-06	6.66071e-06	7.43035e-06	5.23967e-06	4.8718e-06	6.81989e-06	4.17136e-06	7.07187e-06	6.60639e-06	7.17457e-06	6.73039e-06	1.26623e-05	3.95241e-06	4.12936e-06	8.41316e-06	8.2621e-06	7.82873e-06	1.41317e-05	1.21679e-05	3.20293e-06	7.46248e-06	2.32989	1.22026	7.88305e-06	1.83763	up
meta_146	N-lactoyl-phenylalanine	3.58175e-05	6.93802e-05	2.25533e-05	3.85469e-05	4.78255e-05	3.63937e-05	6.67721e-05	2.01755e-05	6.50502e-05	4.0565e-05	5.19154e-05	4.89741e-05	3.76753e-05	4.89848e-05	4.64434e-05	4.73223e-05	4.81635e-05	2.7495e-05	4.1326e-05	1.67558e-05	5.31724e-05	0.000100843	4.68541e-05	9.31982e-05	0.000103952	3.54948e-05	9.36638e-05	6.08907e-05	7.63423e-05	7.24876e-05	7.89861e-05	6.78683e-05	6.44596e-05	6.42955e-05	9.25016e-05	0.000100485	0.000102259	0.000164368	4.29068e-05	8.17846e-05	1.9061	0.930624	2.87918e-05	1.77022	up
meta_148	Glycerophosphoric acid	1.66563e-05	1.31368e-05	1.63477e-05	1.37114e-05	1.34653e-05	2.20465e-05	9.42393e-06	1.14297e-05	3.35093e-05	1.94394e-05	1.47056e-05	3.47319e-05	2.32657e-05	1.54685e-05	1.45392e-05	1.94116e-05	2.11362e-05	2.4757e-05	2.30475e-05	2.52385e-05	3.36657e-05	1.7368e-05	3.57042e-05	2.28855e-05	3.93558e-05	2.06926e-05	1.81725e-05	2.37448e-05	1.27349e-05	4.04977e-05	2.24306e-05	2.09113e-05	4.43392e-05	3.12635e-05	5.76893e-05	4.2997e-05	1.66118e-05	2.78794e-05	1.92734e-05	2.93858e-05	1.52468	0.608506	0.00422583	1.10364	up
meta_149	D-Malic acid	1.7677e-06	2.92667e-06	2.0458e-06	8.8775e-07	2.23663e-06	1.90407e-06	1.70679e-06	2.265e-06	1.10876e-06	2.08855e-06	1.44327e-06	2.77251e-06	1.05153e-06	1.00812e-06	2.13398e-06	3.96999e-07	1.94554e-06	2.73705e-06	1.44332e-06	9.5685e-07	3.35962e-06	2.8705e-06	5.58702e-06	3.96267e-06	1.03301e-06	5.87777e-06	1.13953e-06	3.05167e-06	4.94577e-06	7.52012e-06	1.82209e-06	1.45247e-06	3.98166e-06	3.42029e-06	2.42443e-06	2.93382e-06	5.58995e-06	4.46253e-06	1.74134e-06	3.63527e-06	2.08762	1.06186	0.000371126	1.6149	up
meta_150	Tetradecanedioic acid	4.17391e-05	5.02559e-05	4.56569e-05	3.04396e-05	5.29219e-05	2.71492e-05	3.75289e-05	6.42008e-05	3.15676e-05	2.72137e-05	7.4113e-05	4.36711e-05	4.28063e-05	3.5637e-05	4.82887e-05	3.47697e-05	5.74162e-05	4.57319e-05	4.12138e-05	6.82743e-05	6.02853e-05	0.000262756	6.88474e-05	0.000253339	4.6051e-05	0.000127559	0.000130643	7.55886e-05	8.75218e-05	9.89231e-05	0.000128636	0.000114726	0.000132439	8.41997e-05	5.83906e-05	9.58322e-05	7.68485e-05	9.8751e-05	4.50298e-05	0.000111185	2.46915	1.30402	0.000202419	1.74874	up
meta_151	O-Acetyl-L-serine	9.08889e-06	7.52671e-06	7.89917e-06	7.55745e-06	5.68712e-06	4.99154e-06	9.9078e-06	7.21492e-06	7.71184e-06	1.04255e-05	5.94979e-06	7.21901e-06	6.56131e-06	5.62059e-06	8.10694e-06	7.43883e-06	7.49657e-06	1.19766e-05	7.80833e-06	8.02168e-06	8.04032e-06	5.15894e-06	5.91732e-06	5.36419e-06	8.56804e-06	5.83149e-06	5.49295e-06	5.49098e-06	6.09171e-06	6.73508e-06	9.39361e-06	6.91636e-06	4.83154e-06	8.67382e-06	7.76851e-06	6.98229e-06	6.59789e-06	5.60116e-06	7.71053e-06	6.63646e-06	0.8607	-0.216417	0.0359397	1.0257	down
meta_153	Porphobilinogen	0.000554714	0.000561638	0.000692051	0.000585116	0.000702306	0.000618481	0.000694724	0.000730535	0.000612225	0.000491097	0.000583954	0.000547463	0.000704986	0.000661524	0.000755496	0.000592189	0.000598279	0.000568613	0.000553698	0.000760918	0.000512376	0.000620463	0.000716009	0.000659022	0.000770871	0.000620132	0.000809869	0.000688375	0.000784957	0.000755757	0.000669747	0.00069646	0.000799044	0.000688898	0.000612817	0.000680107	0.000885835	0.0006827	0.0006285	0.000702969	1.11849	0.161547	0.00942636	1.21754	up
meta_155	D-Xylulose 5-phosphate	1.76021e-05	1.52274e-05	2.20953e-05	1.96231e-05	1.81047e-05	2.06311e-05	1.75788e-05	2.02181e-05	1.94437e-05	1.57444e-05	1.46975e-05	2.08848e-05	2.08003e-05	2.25436e-05	1.84239e-05	1.9117e-05	2.78552e-05	1.6059e-05	2.65311e-05	2.89343e-05	2.02799e-05	2.11856e-05	2.50298e-05	1.75927e-05	2.82371e-05	2.00422e-05	2.08444e-05	2.08229e-05	1.93405e-05	2.44014e-05	2.68791e-05	2.643e-05	3.15531e-05	2.83896e-05	3.05475e-05	2.64408e-05	2.42097e-05	3.13232e-05	2.01058e-05	2.46416e-05	1.2256	0.293489	0.00205658	1.31766	up
meta_156	Hexadecanedioic acid	6.20544e-05	9.67558e-05	9.34106e-05	3.93425e-05	8.74281e-05	3.19626e-05	5.65037e-05	8.17033e-05	5.94298e-05	3.57314e-05	0.00011713	5.29313e-05	6.954e-05	5.04235e-05	5.50695e-05	5.23671e-05	0.000290831	0.000121703	5.01344e-05	9.50941e-05	7.72848e-05	0.00040723	8.52033e-05	0.000396045	4.95401e-05	0.000110786	0.000181398	0.000108613	0.00018393	0.000180215	0.000151258	0.000137286	0.000144598	0.000134448	9.2576e-05	0.00012747	0.000138003	0.000223871	7.99773e-05	0.000162764	2.03513	1.02512	0.0037227	1.42736	up
meta_157	2-hydroxy-2-(4-hydroxy-3-methoxyphenyl)acetic acid	9.54114e-06	7.58253e-06	8.47245e-06	6.48258e-06	1.00237e-05	8.06009e-06	1.23331e-05	7.25933e-06	9.18647e-06	9.12624e-06	1.01353e-05	1.12115e-05	9.18718e-06	7.21221e-06	8.45491e-06	8.79234e-06	8.38567e-06	9.12452e-06	7.88711e-06	1.10203e-05	7.55326e-06	1.28446e-05	7.79143e-06	8.99699e-06	1.24732e-05	1.00964e-05	8.28377e-06	1.22838e-05	1.2139e-05	8.26773e-06	9.82721e-06	1.28307e-05	8.54573e-06	1.05822e-05	1.29648e-05	9.68018e-06	1.14204e-05	1.06662e-05	8.97393e-06	1.04026e-05	1.15921	0.213138	0.0144614	1.04165	up
meta_161	Maltitol	1.04414e-06	1.21605e-06	2.87426e-06	1.95269e-06	1.77764e-06	1.49173e-06	1.4238e-06	2.4235e-06	6.72742e-07	2.39437e-06	9.57417e-07	1.24297e-06	2.86949e-06	4.14956e-07	1.434e-06	1.66643e-06	6.57322e-07	1.61925e-06	1.60565e-06	1.44561e-06	5.16673e-06	4.04591e-06	3.83258e-06	2.27251e-06	1.92688e-06	4.99914e-06	2.70006e-06	2.27985e-06	3.052e-06	3.78607e-06	1.05412e-06	9.26954e-07	2.13328e-06	2.01542e-06	1.74465e-06	3.27215e-06	3.55901e-06	2.87629e-06	1.5592e-06	2.86909e-06	1.8401	0.879785	0.000405988	1.47279	up
meta_170	(±)16-HETE	2.74367e-07	1.32555e-07	3.31891e-07	2.27362e-07	2.97944e-07	4.21117e-07	2.60101e-07	2.69095e-07	2.37232e-07	1.8406e-07	4.67312e-07	2.32987e-07	2.48367e-07	3.07925e-07	2.57392e-07	3.38771e-07	5.46839e-07	5.69797e-07	2.17797e-07	3.00567e-07	2.73697e-07	1.57303e-06	2.77585e-07	7.49281e-07	4.31959e-07	3.57471e-07	3.49956e-07	6.94013e-07	1.96445e-07	5.00979e-07	4.35682e-07	5.08105e-07	3.39301e-07	7.09319e-07	5.95372e-07	7.55564e-07	4.52367e-07	6.02262e-07	3.06174e-07	5.44577e-07	1.77865	0.830785	0.00545751	1.28295	up
meta_171	(±)17-HETE	2.74367e-07	1.32555e-07	3.31891e-07	2.27362e-07	2.97944e-07	4.21117e-07	2.60101e-07	2.69095e-07	2.37232e-07	1.8406e-07	4.67312e-07	2.32987e-07	2.48367e-07	3.07925e-07	2.57392e-07	3.38771e-07	5.46839e-07	5.69797e-07	2.17797e-07	3.00567e-07	2.73697e-07	1.57303e-06	2.77585e-07	7.49281e-07	4.31959e-07	3.57471e-07	3.49956e-07	6.94013e-07	1.96445e-07	5.00979e-07	4.35682e-07	5.08105e-07	3.39301e-07	7.09319e-07	5.95372e-07	7.55564e-07	4.52367e-07	6.02262e-07	3.06174e-07	5.44577e-07	1.77865	0.830785	0.00545751	1.28295	up
meta_173	(±)18-HETE	2.74367e-07	1.32555e-07	3.31891e-07	2.27362e-07	2.97944e-07	4.21117e-07	2.60101e-07	2.69095e-07	2.37232e-07	1.8406e-07	4.67312e-07	2.32987e-07	2.48367e-07	3.07925e-07	2.57392e-07	3.38771e-07	5.46839e-07	5.69797e-07	2.17797e-07	3.00567e-07	2.73697e-07	1.57303e-06	2.77585e-07	7.49281e-07	4.31959e-07	3.57471e-07	3.49956e-07	6.94013e-07	1.96445e-07	5.00979e-07	4.35682e-07	5.08105e-07	3.39301e-07	7.09319e-07	5.95372e-07	7.55564e-07	4.52367e-07	6.02262e-07	3.06174e-07	5.44577e-07	1.77865	0.830785	0.00545751	1.28295	up
meta_174	(±)4-HDHA	6.67622e-07	5.59016e-07	4.10201e-07	6.59155e-07	5.9475e-07	5.16553e-07	4.32992e-07	6.43008e-07	8.36339e-07	5.68422e-07	4.00391e-07	9.18748e-07	7.0484e-07	6.66076e-07	5.23733e-07	8.78146e-07	2.21024e-07	8.40618e-07	1.2946e-06	1.28787e-06	8.18749e-07	1.14495e-06	7.38885e-07	1.04634e-06	4.32053e-07	2.20847e-06	1.44514e-06	9.73869e-07	1.24088e-06	8.69565e-07	1.5543e-06	9.74156e-07	1.1202e-06	7.50595e-07	1.2333e-06	9.20571e-07	8.53954e-07	1.24939e-06	6.81206e-07	1.08752e-06	1.59646	0.67488	0.000878487	1.47342	up
meta_175	(±)5-HEPE	7.30367e-07	4.27583e-07	5.51431e-07	4.21858e-07	7.20773e-07	8.44265e-07	6.61985e-07	3.32641e-07	4.99635e-07	3.44135e-07	9.14614e-07	1.06717e-06	4.04534e-07	5.99467e-07	1.48284e-06	7.66495e-07	4.93487e-07	5.88556e-07	1.10246e-06	2.14007e-07	4.87097e-07	4.98762e-07	1.48198e-06	1.34426e-06	1.22611e-06	7.2118e-07	1.1007e-06	3.66458e-07	9.80148e-07	5.68795e-07	1.53934e-06	2.17804e-06	2.61638e-06	4.85933e-07	9.34792e-07	5.20786e-07	4.36673e-07	2.9371e-06	6.58415e-07	1.1347e-06	1.72337	0.785236	0.0228761	1.14395	up
meta_176	(±)5-HETE	1.00158e-05	6.46174e-06	3.96847e-06	4.10704e-06	8.05547e-06	5.2176e-06	5.52329e-06	5.59553e-06	6.85593e-06	7.75915e-06	1.50866e-05	7.27321e-06	4.2552e-06	5.04463e-06	4.56891e-06	5.46603e-06	5.31795e-06	4.80221e-06	4.91325e-06	7.50469e-06	4.10114e-06	7.21289e-06	8.05661e-06	1.03541e-05	6.96538e-06	1.06557e-05	7.90618e-06	6.77319e-06	7.55963e-06	1.04601e-05	2.19721e-05	1.16214e-05	6.44489e-06	7.84322e-06	1.28146e-05	1.08108e-05	8.61746e-06	1.33772e-05	6.38964e-06	9.64148e-06	1.50892	0.59352	0.00560982	1.14604	up
meta_177	(±)9-HETE	1.00158e-05	6.46174e-06	3.96847e-06	4.10704e-06	8.05547e-06	5.2176e-06	5.52329e-06	5.59553e-06	6.85593e-06	7.75915e-06	1.50866e-05	7.27321e-06	4.2552e-06	5.04463e-06	4.56891e-06	5.46603e-06	5.31795e-06	4.80221e-06	4.91325e-06	7.50469e-06	4.10114e-06	7.21289e-06	8.05661e-06	1.03541e-05	6.96538e-06	1.06557e-05	7.90618e-06	6.77319e-06	7.55963e-06	1.04601e-05	2.19721e-05	1.16214e-05	6.44489e-06	7.84322e-06	1.28146e-05	1.08108e-05	8.61746e-06	1.33772e-05	6.38964e-06	9.64148e-06	1.50892	0.59352	0.00560982	1.14604	up
meta_183	19(S)-HETE	3.74972e-07	3.53154e-07	3.39861e-07	3.86662e-07	3.31058e-07	3.55639e-07	1.6078e-07	2.99163e-07	2.93836e-07	2.253e-07	5.82873e-07	2.3637e-07	5.9636e-07	7.97468e-07	8.87187e-07	5.02148e-07	3.91593e-07	3.2933e-07	3.81109e-07	4.35921e-07	2.54876e-07	1.29495e-06	7.31809e-07	1.06408e-06	6.51342e-07	2.84202e-07	9.38602e-07	1.10519e-06	5.97137e-07	5.34108e-07	3.62922e-07	5.28863e-07	5.95142e-07	3.69431e-07	4.8119e-07	7.00562e-07	5.11132e-08	1.4556e-06	4.13039e-07	6.66729e-07	1.6142	0.690821	0.0156715	1.21411	up
meta_184	20-HETE	3.74972e-07	3.53154e-07	3.39861e-07	3.86662e-07	3.31058e-07	3.55639e-07	1.6078e-07	2.99163e-07	2.93836e-07	2.253e-07	5.82873e-07	2.3637e-07	5.9636e-07	7.97468e-07	8.87187e-07	5.02148e-07	3.91593e-07	3.2933e-07	3.81109e-07	4.35921e-07	2.54876e-07	1.29495e-06	7.31809e-07	1.06408e-06	6.51342e-07	2.84202e-07	9.38602e-07	1.10519e-06	5.97137e-07	5.34108e-07	3.62922e-07	5.28863e-07	5.95142e-07	3.69431e-07	4.8119e-07	7.00562e-07	5.11132e-08	1.4556e-06	4.13039e-07	6.66729e-07	1.6142	0.690821	0.0156715	1.21411	up
meta_186	5,6-DiHETrE	3.9342e-06	2.91363e-06	9.38612e-07	1.40014e-06	1.87976e-06	2.40813e-06	2.03242e-06	2.91326e-06	2.23884e-06	2.93101e-06	3.14527e-06	2.00255e-06	1.56678e-06	2.22193e-06	3.16867e-06	2.40298e-06	1.37126e-06	2.60395e-06	3.13455e-06	5.12907e-06	1.86268e-06	4.24972e-06	4.34631e-06	7.11e-06	3.03714e-06	4.67293e-06	3.57469e-06	1.44181e-06	2.74787e-06	5.43228e-06	2.69807e-06	5.07854e-06	5.13238e-06	4.55065e-06	2.85671e-06	5.62627e-06	1.58696e-06	2.86139e-06	2.51685e-06	3.82591e-06	1.52012	0.604184	0.00462681	1.24158	up
meta_191	FFA(14:0)	1.04577e-06	8.85996e-07	1.1687e-06	7.31405e-07	7.60212e-07	1.16152e-06	1.14945e-06	8.69125e-07	1.21108e-06	7.8985e-07	1.408e-06	1.65918e-06	9.24696e-07	8.92273e-07	1.02346e-06	1.0155e-06	6.40204e-07	1.05184e-06	1.3033e-06	1.20288e-06	1.7882e-06	1.83247e-06	2.10233e-06	3.0644e-06	1.16662e-06	4.44066e-06	1.60019e-06	1.4468e-06	2.47086e-06	1.90138e-06	7.12255e-07	1.94137e-06	2.28483e-06	1.73546e-06	9.26202e-07	1.61484e-06	1.28692e-06	3.44141e-06	1.04472e-06	1.98651e-06	1.90147	0.927116	0.000447286	1.64084	up
meta_192	Myoinositol	6.25546e-06	6.4367e-06	1.38632e-05	1.03347e-05	9.32401e-06	8.50954e-06	7.20271e-06	1.20775e-05	8.54024e-06	1.02797e-05	8.20535e-06	8.27368e-06	1.26057e-05	7.78254e-06	7.56111e-06	1.00102e-05	7.05732e-06	6.0217e-06	1.19639e-05	8.23989e-06	2.1048e-05	2.34732e-05	2.3965e-05	1.37461e-05	1.17388e-05	2.90795e-05	2.32932e-05	1.4982e-05	2.26832e-05	3.29476e-05	1.2963e-05	1.03242e-05	1.69139e-05	1.50042e-05	1.33053e-05	1.69571e-05	2.48177e-05	1.89934e-05	9.02725e-06	1.92353e-05	2.1308	1.0914	1.94952e-06	2.01978	up
meta_208	Uric acid	0.000697572	0.00109114	0.000169514	0.000810146	0.000772487	0.000814504	0.00125899	0.000173452	0.00141007	0.00141161	0.00130022	0.00103049	8.87824e-05	0.00023658	0.000302266	0.00110516	0.000434607	0.000557291	0.000611484	0.000252616	0.00103913	0.00144539	0.000651253	0.00139066	0.00273935	0.000394277	0.00109997	0.00100342	0.00114785	0.00207796	0.00196731	0.00105744	0.000521494	0.00129497	0.00178615	0.00159071	0.000548861	0.00237949	0.000726449	0.00134087	1.84579	0.884237	0.00223599	1.15271	up
meta_209	Diphenylamine	1.60456e-05	1.84409e-05	1.84341e-05	1.90146e-05	1.98549e-05	1.98818e-05	1.9608e-05	1.81391e-05	1.79853e-05	1.81443e-05	1.85671e-05	1.5409e-05	1.82195e-05	1.93661e-05	1.77502e-05	1.84044e-05	1.7929e-05	1.89609e-05	1.76647e-05	1.9486e-05	1.59175e-05	1.43421e-05	1.62775e-05	1.55503e-05	1.54366e-05	1.61005e-05	1.84031e-05	1.56331e-05	1.40915e-05	1.61012e-05	1.57571e-05	1.25255e-05	1.59048e-05	1.50216e-05	1.54951e-05	1.44109e-05	1.55395e-05	1.34723e-05	1.83653e-05	1.53322e-05	0.83485	-0.260411	5.12594e-09	2.05169	down
meta_210	3-hydroxyphenylacetic acid	1.5186e-05	2.21212e-05	1.94602e-05	1.75184e-05	1.68504e-05	1.99199e-05	1.93547e-05	2.05784e-05	2.64026e-05	2.31195e-05	3.08488e-05	2.53273e-05	1.89092e-05	2.02918e-05	5.66117e-06	1.02803e-05	1.17822e-05	1.92644e-05	7.69969e-06	1.93952e-05	2.60871e-05	1.74265e-05	1.20379e-05	1.31562e-05	5.25994e-06	5.58109e-06	1.96513e-05	5.5482e-06	4.98149e-06	6.9103e-06	7.11995e-06	8.47177e-06	8.36719e-06	3.79407e-06	4.6083e-06	4.4961e-06	8.96572e-06	5.92889e-06	1.84986e-05	9.35511e-06	0.505721	-0.983586	5.41006e-05	1.64535	down
meta_213	13(R)-HODE	2.77223e-05	2.50034e-05	1.93516e-05	1.69342e-05	2.38806e-05	1.97604e-05	2.64614e-05	1.40273e-05	4.78522e-05	1.32412e-05	3.40658e-05	1.73845e-05	2.62982e-05	1.80766e-05	2.2756e-05	2.47569e-05	6.47131e-05	2.78091e-05	1.45479e-05	1.28243e-05	4.25475e-05	9.5853e-05	2.73917e-05	6.13251e-05	3.03554e-05	5.81678e-05	5.21951e-05	3.84455e-05	1.97876e-05	9.05166e-05	2.02084e-05	2.79096e-05	3.13245e-05	2.5137e-05	2.50036e-05	2.63763e-05	4.29305e-05	4.84282e-05	2.48733e-05	4.24391e-05	1.70621	0.770793	0.00668225	1.33237	up
meta_215	2-Amino-4,6-pteridinediol	1.04544e-06	1.75788e-06	1.4798e-06	2.46458e-06	9.38485e-07	1.62692e-06	2.97614e-06	1.05962e-06	1.99222e-06	1.63784e-06	1.46732e-06	1.55547e-06	1.71117e-06	1.0941e-06	7.61735e-07	1.10606e-06	1.29881e-06	1.87833e-06	1.54415e-06	1.45191e-06	2.21942e-06	2.77288e-06	2.47097e-06	1.55491e-06	3.33159e-06	1.12249e-06	6.342e-07	1.72624e-06	3.86139e-06	3.08494e-06	5.15799e-06	2.07425e-06	1.06785e-06	2.80282e-06	3.18619e-06	2.27767e-06	5.11036e-06	4.86835e-06	1.5424e-06	2.74025e-06	1.77662	0.829132	0.00197113	1.34251	up
meta_216	2-Hydroxyglutaric acid	3.687e-06	1.03296e-06	8.17205e-07	2.20111e-06	6.08794e-06	3.06912e-06	4.26252e-06	2.63816e-06	2.64826e-06	2.25556e-06	7.60005e-06	4.91655e-06	2.21901e-06	2.95669e-06	2.88763e-06	1.9908e-06	5.91647e-06	5.00968e-06	3.21345e-06	2.75015e-06	2.47453e-06	3.61867e-06	5.0219e-06	4.34091e-06	3.87498e-06	2.72449e-06	5.99357e-06	5.67635e-06	4.53309e-06	5.06651e-06	8.21251e-06	7.16584e-06	6.92467e-06	6.62412e-06	8.65251e-06	3.73869e-06	8.28687e-06	5.78799e-06	3.40802e-06	5.48434e-06	1.60925	0.686387	0.00123382	1.38207	up
meta_220	N-arachidene glycine	4.88045e-07	4.87966e-07	3.95836e-07	1.4595e-06	5.52965e-07	4.59768e-07	4.18901e-07	9.95204e-07	3.71638e-07	5.34724e-07	1.21659e-06	5.87085e-07	4.40266e-07	7.31589e-07	4.1587e-07	4.84674e-07	6.11896e-07	6.48764e-07	4.71474e-07	8.48848e-07	5.12903e-07	2.00872e-06	4.42394e-07	1.5243e-06	9.12477e-07	5.25031e-07	6.43557e-07	5.44152e-07	1.08637e-06	2.31262e-06	9.64521e-07	9.71079e-07	1.16604e-06	1.12402e-06	8.35658e-07	1.095e-06	3.66843e-06	2.56469e-06	6.3108e-07	1.27233e-06	2.01612	1.01158	0.00655134	1.39793	up
meta_223	cis-EODA	8.33143e-06	8.23514e-06	1.50182e-05	6.52337e-06	8.33971e-06	7.1029e-06	6.51403e-06	6.32671e-06	1.33981e-05	5.00095e-06	1.13278e-05	8.56594e-06	8.98712e-06	6.35109e-06	5.92434e-06	1.06842e-05	9.65917e-06	1.84069e-05	5.94986e-06	9.80801e-06	1.58763e-05	2.11271e-05	8.89405e-06	1.06077e-05	8.46566e-06	1.10791e-05	1.74733e-05	9.51605e-06	9.50799e-06	1.08454e-05	1.10009e-05	1.13792e-05	1.97162e-05	1.17311e-05	9.97913e-06	1.14535e-05	8.6365e-06	2.22495e-05	9.02275e-06	1.27521e-05	1.41333	0.499101	0.00719451	1.18568	up
meta_224	FFA(22:6)	0.000434099	0.000242053	0.000569425	0.00039665	0.000309335	0.000361989	0.000376031	0.000378809	0.00072335	0.00034199	0.00038819	0.000546006	0.000363293	0.000283367	0.000486094	0.000759601	0.000263861	0.00062228	0.000554857	0.000499603	0.00041791	0.000573982	0.000463567	0.00127009	0.000239899	0.00071995	0.000723582	0.00083063	0.00101977	0.000531081	0.000447706	0.00061089	0.000835961	0.000593102	0.000496074	0.000468106	0.00035371	0.00121559	0.000445044	0.0006562	1.47446	0.560186	0.00926983	1.28918	up
meta_227	2-ethyl-2-hydroxybutyric acid	2.18427e-06	3.91614e-06	3.01405e-06	3.43686e-06	1.08512e-05	4.16968e-06	4.64115e-06	3.76574e-06	2.44464e-06	3.82541e-06	5.28909e-06	8.04687e-06	2.6684e-06	2.22817e-06	5.79122e-06	3.80526e-06	3.2133e-06	4.9895e-06	2.51195e-06	1.4034e-06	5.8923e-06	8.25456e-06	4.66576e-06	1.79691e-05	6.38208e-06	4.99914e-06	8.58414e-06	4.25837e-06	5.50373e-06	4.07758e-06	5.49715e-06	3.75824e-06	5.98359e-06	4.87987e-06	2.87803e-06	6.30609e-06	5.99901e-06	8.27497e-06	4.10981e-06	6.34243e-06	1.54324	0.625962	0.0213465	1.08601	up
meta_229	1,6-anhydro-β-D-glucose	1.24322e-06	1.11099e-06	2.91174e-06	2.16465e-06	1.63278e-06	2.10629e-06	1.6621e-06	2.74197e-06	2.48606e-06	3.78588e-06	2.24016e-06	1.74228e-06	2.82842e-06	1.41432e-06	2.27926e-06	1.41568e-06	1.48673e-06	1.15198e-06	3.00512e-06	2.09715e-06	6.7689e-06	6.27859e-06	4.79382e-06	4.88192e-06	3.13445e-06	8.63307e-06	7.05342e-06	3.92255e-06	8.53989e-06	1.05383e-05	2.84315e-06	1.43247e-06	4.89229e-06	4.02947e-06	2.76438e-06	5.40891e-06	6.37014e-06	5.18007e-06	2.07534e-06	5.41477e-06	2.6091	1.38355	1.06648e-05	1.90923	up
meta_230	16-Hydroxyhexadecanoic acid	0.000477342	0.000417528	0.000432597	0.000409729	0.000523564	0.000546089	0.000549097	0.000519532	0.000867881	0.000597696	0.000625069	0.000675464	0.000612815	0.000621665	0.000603008	0.000600244	0.000637778	0.000516844	0.000573006	0.000597305	0.000619101	0.00120197	0.000931105	0.00113535	0.000590383	0.000780731	0.000667331	0.000859059	0.000882185	0.000868935	0.000915945	0.000964782	0.000896316	0.000982361	0.000747649	0.000724994	0.000964677	0.00103661	0.000570213	0.000876083	1.53641	0.619568	2.7867e-07	2.1292	up
meta_237	DL-2-hydroxystearic acid	1.67362e-05	1.61834e-05	1.48859e-05	1.61658e-05	1.79895e-05	1.59743e-05	1.87477e-05	1.76304e-05	2.13939e-05	1.78516e-05	1.81361e-05	1.68721e-05	1.74376e-05	2.08064e-05	1.99016e-05	2.16989e-05	1.55599e-05	1.07794e-05	1.69438e-05	1.7936e-05	1.81959e-05	3.96298e-05	2.46918e-05	3.67649e-05	1.99068e-05	1.9369e-05	2.1923e-05	3.04072e-05	3.07594e-05	2.63452e-05	3.28841e-05	2.89296e-05	2.78787e-05	2.38758e-05	2.29917e-05	2.07368e-05	2.20459e-05	3.08239e-05	1.74815e-05	2.65644e-05	1.51957	0.603664	6.62878e-06	1.96419	up
meta_239	2-hydroxyhexadecanoic acid	0.000477342	0.000417528	0.000432597	0.000409729	0.000523564	0.000546089	0.000549097	0.000519532	0.000867881	0.000597696	0.000625069	0.000675464	0.000612815	0.000621665	0.000603008	0.000600244	0.000637778	0.000516844	0.000573006	0.000597305	0.000619101	0.00120197	0.000931105	0.00113535	0.000590383	0.000780731	0.000667331	0.000859059	0.000882185	0.000868935	0.000915945	0.000964782	0.000896316	0.000982361	0.000747649	0.000724994	0.000964677	0.00103661	0.000570213	0.000876083	1.53641	0.619568	2.7867e-07	2.1292	up
meta_242	FFA(20:4)	1.24887e-05	8.57252e-06	8.90593e-06	1.14444e-05	1.10684e-05	1.3969e-05	1.07126e-05	1.1381e-05	1.45622e-05	1.52034e-05	1.40341e-05	1.23963e-05	1.40991e-05	1.10127e-05	1.3268e-05	1.05598e-05	1.18491e-05	1.15718e-05	1.27431e-05	1.37116e-05	1.25228e-05	1.85496e-05	1.52622e-05	2.25165e-05	1.30092e-05	1.29004e-05	1.1828e-05	1.79869e-05	1.88896e-05	2.15223e-05	1.76417e-05	1.90318e-05	1.63528e-05	1.85724e-05	1.37985e-05	1.58992e-05	1.70459e-05	2.85839e-05	1.21777e-05	1.73285e-05	1.42297	0.508909	6.53836e-05	1.85103	up
meta_246	D-Mannose 6-phosphate	2.73364e-06	4.51084e-06	4.07242e-06	5.71115e-06	7.29979e-06	4.67586e-06	6.77081e-06	3.30451e-06	5.77546e-06	6.03335e-06	6.94719e-06	2.90128e-06	4.88522e-06	6.08937e-06	4.41455e-06	8.14679e-06	2.84155e-06	5.10575e-06	3.58486e-06	5.2702e-06	8.39075e-06	1.22363e-05	9.8241e-06	5.59212e-06	8.12076e-06	1.56732e-05	1.4398e-05	9.46091e-06	2.34698e-05	3.03786e-05	1.04604e-05	7.94492e-06	1.10538e-05	8.9586e-06	9.33947e-06	8.93002e-06	2.21048e-05	2.05213e-05	5.05373e-06	1.31588e-05	2.60377	1.3806	8.26941e-05	1.83325	up
meta_251	1-pyrroline-4-hydroxy-2-carboxylate	2.91634e-05	5.26034e-05	1.62257e-05	1.86717e-05	3.32157e-05	2.57098e-05	3.95043e-05	2.3072e-05	2.72687e-05	2.19755e-05	3.76571e-05	2.10071e-05	1.77752e-05	3.28037e-05	3.70191e-05	4.60669e-05	4.22254e-05	3.39908e-05	1.88507e-05	3.97791e-05	1.77353e-05	3.53119e-05	1.36256e-05	2.37025e-05	2.42875e-05	1.36738e-05	2.96101e-05	1.49903e-05	1.77344e-05	1.14673e-05	2.93662e-05	3.25628e-05	3.53512e-05	2.24587e-05	1.88429e-05	2.42038e-05	1.99794e-05	2.41403e-05	3.07293e-05	2.27247e-05	0.739512	-0.435354	0.00936092	1.02216	down
meta_252	LPS(16:2/0:0)	5.49089e-07	2.30211e-07	4.32166e-07	3.96826e-07	5.19851e-07	4.99563e-07	4.78118e-07	5.50423e-07	6.21371e-07	3.8157e-07	3.33767e-07	7.38631e-07	5.38838e-07	6.9814e-07	4.51194e-07	5.48939e-07	4.03563e-07	3.63296e-07	5.77858e-07	3.80822e-07	9.54227e-07	6.90731e-07	5.0862e-07	7.72135e-07	7.17067e-07	7.79514e-07	5.92216e-07	4.27403e-07	9.15916e-07	1.03472e-06	6.56886e-07	1.2559e-06	4.33555e-07	8.70624e-07	6.41704e-07	1.07443e-06	7.1591e-07	7.30778e-07	4.84712e-07	7.6513e-07	1.57852	0.658577	6.76526e-05	1.60289	up
meta_253	LPE(0:0/22:4)	3.03111e-05	6.00163e-05	1.20712e-05	3.85943e-05	5.09265e-05	3.77597e-05	2.78253e-05	3.43301e-05	3.91903e-05	5.5272e-05	5.6843e-05	6.81884e-05	3.33597e-05	2.96582e-05	3.20851e-05	1.84233e-05	2.04127e-05	2.32196e-05	3.36191e-05	2.9413e-05	5.41206e-05	9.9824e-05	8.34899e-05	0.000109799	6.70256e-05	0.000127432	4.25116e-05	5.53255e-05	7.33809e-05	0.000110296	8.73505e-05	0.000204121	2.33774e-05	7.3453e-05	3.54443e-05	0.000225955	6.83632e-05	0.000171338	3.65759e-05	9.51448e-05	2.6013	1.37923	0.000390923	1.55512	up
meta_254	LPE(22:4/0:0)	3.03111e-05	6.00163e-05	1.20712e-05	3.85943e-05	5.09265e-05	3.77597e-05	2.78253e-05	3.43301e-05	3.91903e-05	5.5272e-05	5.6843e-05	6.81884e-05	3.33597e-05	2.96582e-05	3.20851e-05	1.84233e-05	2.04127e-05	2.32196e-05	3.36191e-05	2.9413e-05	5.41206e-05	9.9824e-05	8.34899e-05	0.000109799	6.70256e-05	0.000127432	4.25116e-05	5.53255e-05	7.33809e-05	0.000110296	8.73505e-05	0.000204121	2.33774e-05	7.3453e-05	3.54443e-05	0.000225955	6.83632e-05	0.000171338	3.65759e-05	9.51448e-05	2.6013	1.37923	0.000390923	1.55512	up
meta_255	LPE(0:0/22:5)	4.21034e-05	0.000114745	2.18603e-05	0.00014942	8.39479e-05	5.93969e-05	8.36842e-05	8.83681e-05	8.74386e-05	7.71153e-05	0.000114778	0.000142052	3.97271e-05	4.96836e-05	7.01835e-05	3.86868e-05	2.8064e-05	3.28191e-05	7.69264e-05	9.77203e-05	0.000135839	0.000262873	8.85516e-05	0.000137943	0.000100007	0.000270344	8.28897e-05	0.000132481	0.000182372	0.000228815	0.000109442	0.000388178	3.88634e-05	0.000178571	7.91206e-05	0.000266685	9.53187e-05	0.00023188	7.4936e-05	0.000167232	2.23166	1.15812	0.000572825	1.47889	up
meta_256	LPE(22:5/0:0)	4.21034e-05	0.000114745	2.18603e-05	0.00014942	8.39479e-05	5.93969e-05	8.36842e-05	8.83681e-05	8.74386e-05	7.71153e-05	0.000114778	0.000142052	3.97271e-05	4.96836e-05	7.01835e-05	3.86868e-05	2.8064e-05	3.28191e-05	7.69264e-05	9.77203e-05	0.000135839	0.000262873	8.85516e-05	0.000137943	0.000100007	0.000270344	8.28897e-05	0.000132481	0.000182372	0.000228815	0.000109442	0.000388178	3.88634e-05	0.000178571	7.91206e-05	0.000266685	9.53187e-05	0.00023188	7.4936e-05	0.000167232	2.23166	1.15812	0.000572825	1.47889	up
meta_257	LPE(0:0/22:6)	0.00112243	0.00104122	0.000970837	0.00132982	0.00127974	0.000948282	0.000737084	0.000926526	0.00129718	0.00108755	0.00122887	0.00206626	0.000874043	0.000784085	0.00127412	0.00141324	0.000814347	0.000996579	0.00149815	0.000997209	0.00164218	0.00194451	0.00129815	0.00224956	0.00120962	0.00303942	0.00195293	0.00192671	0.00309114	0.00233153	0.0016626	0.00294204	0.00168726	0.00143606	0.00167477	0.00227846	0.00122232	0.00268232	0.00113438	0.00201509	1.77638	0.828942	1.07137e-05	1.84378	up
meta_258	LPE(22:6/0:0)	0.00112243	0.00104122	0.000970837	0.00132982	0.00127974	0.000948282	0.000737084	0.000926526	0.00129718	0.00108755	0.00122887	0.00206626	0.000874043	0.000784085	0.00127412	0.00141324	0.000814347	0.000996579	0.00149815	0.000997209	0.00164218	0.00194451	0.00129815	0.00224956	0.00120962	0.00303942	0.00195293	0.00192671	0.00309114	0.00233153	0.0016626	0.00294204	0.00168726	0.00143606	0.00167477	0.00227846	0.00122232	0.00268232	0.00113438	0.00201509	1.77638	0.828942	1.07137e-05	1.84378	up
meta_259	LPE(0:0/20:2)	7.26647e-05	9.14192e-05	3.70704e-05	0.000117541	9.31369e-05	0.000117885	5.79652e-05	6.94953e-05	7.44656e-05	7.95341e-05	0.000105695	0.00015404	7.78627e-05	6.06729e-05	6.16965e-05	6.81504e-05	0.000100843	6.57233e-05	0.000107359	4.0436e-05	0.000134076	0.000186756	7.52763e-05	7.17911e-05	9.04949e-05	0.000144865	5.92053e-05	0.000103373	7.08083e-05	0.000174247	0.000113186	0.000159552	0.000105935	8.76825e-05	8.11477e-05	0.000270661	0.000107896	0.000105453	8.26829e-05	0.000119023	1.43951	0.525575	0.0151929	1.00692	up
meta_260	LPE(20:2/0:0)	7.26647e-05	9.14192e-05	3.70704e-05	0.000117541	9.31369e-05	0.000117885	5.79652e-05	6.94953e-05	7.44656e-05	7.95341e-05	0.000105695	0.00015404	7.78627e-05	6.06729e-05	6.16965e-05	6.81504e-05	0.000100843	6.57233e-05	0.000107359	4.0436e-05	0.000134076	0.000186756	7.52763e-05	7.17911e-05	9.04949e-05	0.000144865	5.92053e-05	0.000103373	7.08083e-05	0.000174247	0.000113186	0.000159552	0.000105935	8.76825e-05	8.11477e-05	0.000270661	0.000107896	0.000105453	8.26829e-05	0.000119023	1.43951	0.525575	0.0151929	1.00692	up
meta_261	LPE(0:0/20:3)	0.000662594	0.000787623	0.000374169	0.00066936	0.000971572	0.000816579	0.000601298	0.000476834	0.000632551	0.000835366	0.000840234	0.0016014	0.000459849	0.000496349	0.000569236	0.000560826	0.000446356	0.000353385	0.00119392	0.000397609	0.00132532	0.00091357	0.00123583	0.00156478	0.0014226	0.00230914	0.000838136	0.000962591	0.00174735	0.00172405	0.00125824	0.00311311	0.00115774	0.00129695	0.00111814	0.0026391	0.0010578	0.00201134	0.000687355	0.00153865	2.23851	1.16254	2.22014e-05	1.70725	up
meta_262	LPE(20:3/0:0)	0.000662594	0.000787623	0.000374169	0.00066936	0.000971572	0.000816579	0.000601298	0.000476834	0.000632551	0.000835366	0.000840234	0.0016014	0.000459849	0.000496349	0.000569236	0.000560826	0.000446356	0.000353385	0.00119392	0.000397609	0.00132532	0.00091357	0.00123583	0.00156478	0.0014226	0.00230914	0.000838136	0.000962591	0.00174735	0.00172405	0.00125824	0.00311311	0.00115774	0.00129695	0.00111814	0.0026391	0.0010578	0.00201134	0.000687355	0.00153865	2.23851	1.16254	2.22014e-05	1.70725	up
meta_263	LPE(20:4/0:0)	0.00121719	0.00101712	0.000613027	0.00102317	0.00110935	0.000960756	0.000664329	0.000881241	0.0010599	0.00114932	0.00114568	0.00142113	0.000907319	0.000885788	0.000981547	0.000930292	0.000814273	0.000706483	0.000898901	0.000930159	0.00113959	0.00165388	0.00130435	0.00155404	0.00160587	0.00219579	0.00111859	0.00122304	0.00180257	0.00194796	0.00140524	0.00241507	0.00124745	0.00122116	0.00115209	0.00208591	0.00130831	0.00165269	0.000965849	0.00155742	1.61249	0.689291	6.06922e-06	1.8285	up
meta_266	LPE(0:0/18:0)	0.00109762	0.000657741	0.000661417	0.00128997	0.0010581	0.0010981	0.00114419	0.000754398	0.00127671	0.0011671	0.00110369	0.0011244	0.000832612	0.00087886	0.00117869	0.000851151	0.00115375	0.000643831	0.00204198	0.000601052	0.00196084	0.00102104	0.00190076	0.0013118	0.00204274	0.00254458	0.00122798	0.00119454	0.00170428	0.00272411	0.00156954	0.00397707	0.00197162	0.00125475	0.00130266	0.00340274	0.00133334	0.00205313	0.00103077	0.00191653	1.85932	0.894775	0.000253752	1.53447	up
meta_267	LPE(0:0/18:2)	0.00622398	0.00930338	0.00433935	0.00888902	0.0105469	0.00821108	0.00611342	0.00460896	0.00694739	0.00789823	0.00937704	0.011504	0.00602907	0.00493897	0.00687234	0.00567618	0.0121553	0.00768572	0.00766655	0.00429879	0.014999	0.0152	0.0124784	0.00956441	0.0137415	0.0182419	0.0078077	0.00755055	0.00927987	0.0120654	0.00669706	0.0178251	0.00770967	0.00868372	0.00723166	0.0124355	0.00938903	0.00838534	0.00746428	0.0110714	1.48325	0.568766	0.00131469	1.31687	up
meta_270	LPE(0:0/16:0)	0.00519456	0.00391823	0.00311696	0.00652053	0.00527919	0.00489939	0.00407853	0.00386984	0.00680869	0.00561637	0.00505049	0.00685021	0.00380596	0.00392743	0.00548483	0.00431033	0.0052006	0.00283039	0.0102312	0.00390099	0.00986363	0.00632721	0.0115412	0.00825989	0.00972382	0.0133936	0.00810584	0.0075342	0.0127248	0.0130849	0.0109012	0.0194831	0.00913771	0.00744617	0.00891614	0.02085	0.00792478	0.0131006	0.00504473	0.0110177	2.184	1.12697	5.60836e-06	1.82133	up
meta_271	LPE(0:0/16:1)	8.56936e-05	7.72051e-05	4.05755e-05	5.14153e-05	0.00012538	7.68684e-05	2.89404e-05	5.67802e-05	4.5942e-05	7.51363e-05	0.000111742	0.000223677	4.57467e-05	6.54338e-05	9.78632e-05	5.76631e-05	4.86046e-05	3.11967e-05	0.000119876	4.29995e-05	0.000205552	6.2084e-05	0.00031728	0.000179567	0.000159185	0.000271688	0.00011138	0.000115843	0.00034838	0.000208896	0.000246432	0.000578448	0.000106035	0.000103522	0.000109388	0.000311935	7.66786e-05	0.000198431	7.54369e-05	0.000206151	2.73276	1.45036	0.000486876	1.46937	up
meta_272	Glycine linoleate	5.01554e-06	5.83926e-06	6.37593e-06	1.51493e-05	5.63592e-06	4.80399e-06	6.23526e-06	7.83083e-06	5.56191e-06	4.90692e-06	1.21006e-05	6.00876e-06	5.99297e-06	6.91106e-06	5.5071e-06	7.10168e-06	8.42787e-06	7.66448e-06	6.76315e-06	5.69574e-06	1.36919e-05	2.69255e-05	5.06422e-06	1.13521e-05	7.2039e-06	1.46209e-05	8.5282e-06	6.74798e-06	9.66924e-06	1.72578e-05	7.51676e-06	1.11744e-05	1.27796e-05	9.49872e-06	6.18242e-06	9.24682e-06	2.44644e-05	1.78033e-05	6.97642e-06	1.22071e-05	1.74977	0.807165	0.00265811	1.47322	up
meta_275	2-hydroxyphenylacetic acid	2.06683e-06	2.85233e-06	1.608e-06	4.04064e-06	5.82917e-06	2.82697e-06	2.65633e-06	3.39611e-06	2.19814e-06	4.7932e-06	2.60726e-06	5.44475e-06	2.52269e-06	3.80456e-06	3.0622e-06	5.79519e-06	2.05201e-06	4.56666e-06	4.12264e-06	3.24584e-06	3.55375e-06	5.20586e-06	3.21484e-06	4.73198e-06	8.79455e-06	4.35508e-06	4.22542e-06	4.41576e-06	4.89966e-06	5.18316e-06	6.60537e-06	4.17627e-06	4.92327e-06	5.45638e-06	8.02508e-06	5.27764e-06	6.55927e-06	9.77049e-06	3.47458e-06	5.52077e-06	1.5889	0.668032	0.000351751	1.49033	up
meta_276	4-Hydroxy-3-methylbenzoic acid	2.06683e-06	2.85233e-06	1.608e-06	4.04064e-06	5.82917e-06	2.82697e-06	2.65633e-06	3.39611e-06	2.19814e-06	4.7932e-06	2.60726e-06	5.44475e-06	2.52269e-06	3.80456e-06	3.0622e-06	5.79519e-06	2.05201e-06	4.56666e-06	4.12264e-06	3.24584e-06	3.55375e-06	5.20586e-06	3.21484e-06	4.73198e-06	8.79455e-06	4.35508e-06	4.22542e-06	4.41576e-06	4.89966e-06	5.18316e-06	6.60537e-06	4.17627e-06	4.92327e-06	5.45638e-06	8.02508e-06	5.27764e-06	6.55927e-06	9.77049e-06	3.47458e-06	5.52077e-06	1.5889	0.668032	0.000351751	1.49033	up
meta_278	2-Methylglutaric Acid	1.00051e-06	9.61677e-07	1.43236e-06	6.91234e-07	1.54929e-06	6.91155e-07	1.84144e-06	1.03581e-06	6.04982e-07	8.02544e-07	1.23129e-06	1.61535e-06	8.2171e-07	1.14056e-06	8.08248e-07	7.57816e-07	1.00894e-06	1.36334e-06	7.99625e-07	9.64377e-07	1.47044e-06	2.84853e-06	3.94332e-07	2.70073e-06	1.74708e-06	2.21431e-06	1.63084e-06	1.1649e-06	9.37246e-07	2.02507e-06	2.47008e-06	9.27528e-07	6.0046e-07	1.87717e-06	6.95276e-07	1.69412e-06	1.84743e-06	7.42929e-07	1.05611e-06	1.55492e-06	1.4723	0.558072	0.0154009	1.05339	up
meta_280	(S)-Leucic acid	1.82827e-05	2.3518e-05	8.79306e-06	4.56648e-06	1.36141e-05	1.11103e-05	1.58902e-05	4.27049e-06	1.11324e-05	9.00227e-06	1.12606e-05	1.01449e-05	6.97972e-06	8.62981e-06	8.16801e-06	1.46121e-05	1.23679e-05	1.64748e-05	4.56262e-06	7.52169e-06	1.20102e-05	3.63556e-05	1.31138e-05	4.06658e-05	1.70224e-05	1.17132e-05	2.46887e-05	1.55846e-05	1.12732e-05	1.43589e-05	8.74274e-06	8.75705e-06	8.25273e-06	1.01761e-05	1.17967e-05	1.08489e-05	5.25826e-05	2.21631e-05	1.10451e-05	1.83392e-05	1.6604	0.731527	0.0310867	1.10791	up
meta_284	8-Aminooctanoic Acid	3.52881e-05	3.99035e-05	4.24819e-05	3.3199e-05	4.0278e-05	3.22138e-05	4.17882e-05	3.5943e-05	3.57768e-05	4.25211e-05	3.97743e-05	4.06634e-05	4.20274e-05	3.89941e-05	3.91017e-05	3.81034e-05	3.99946e-05	3.48711e-05	3.68872e-05	3.98798e-05	3.42008e-05	2.98514e-05	3.95143e-05	3.16485e-05	4.20627e-05	3.16317e-05	3.55714e-05	4.35064e-05	3.33129e-05	3.48024e-05	3.6133e-05	3.60513e-05	3.3163e-05	3.40952e-05	3.69328e-05	3.21393e-05	3.53628e-05	3.11267e-05	3.84845e-05	3.50615e-05	0.911054	-0.134391	0.00393522	1.2317	down
meta_286	Tridecanedioic acid	7.93061e-05	7.82002e-05	8.92333e-05	0.000104076	9.14042e-05	9.3671e-05	9.71405e-05	0.000102974	7.14289e-05	7.87044e-05	9.61376e-05	8.99536e-05	9.71373e-05	9.84445e-05	0.000105344	0.000102924	0.000100383	0.000108764	9.81691e-05	0.000112216	0.000139711	0.0001308	0.000130264	0.000136881	0.000130298	0.000143115	0.000159364	0.000131593	0.000122256	0.00012088	0.000140497	0.000120191	0.000130685	0.000127467	0.000123616	0.000119779	0.000124743	0.000137376	9.47806e-05	0.00013164	1.38889	0.473931	7.39936e-13	2.27385	up
meta_287	12-Hydroxyoctadecanoic acid	4.18508e-06	5.73023e-06	7.87285e-06	4.79675e-06	4.86429e-06	3.55075e-06	3.8069e-06	2.72962e-06	6.58121e-06	2.80178e-06	3.87028e-06	3.9609e-06	4.96399e-06	5.06884e-06	5.75885e-06	3.39642e-06	2.57346e-06	4.73862e-06	4.41655e-06	7.24158e-06	8.99758e-06	3.22599e-05	1.40613e-05	1.77963e-05	6.74567e-06	8.90147e-06	1.38819e-05	1.0012e-05	9.21679e-06	9.44683e-06	5.1934e-06	8.58119e-06	8.62842e-06	8.31031e-06	9.69632e-06	8.20183e-06	8.82754e-06	2.19691e-05	4.64545e-06	1.17071e-05	2.52013	1.3335	0.000269915	1.73593	up
meta_288	N-Palmitoylglycine	6.17878e-06	6.22099e-06	8.27615e-06	1.13001e-05	9.11053e-06	7.24628e-06	1.0103e-05	8.9784e-06	1.23274e-05	8.24614e-06	1.1235e-05	8.61755e-06	1.00361e-05	1.08563e-05	9.87376e-06	1.06858e-05	9.69328e-06	9.86911e-06	1.07222e-05	9.40393e-06	1.17425e-05	1.93827e-05	1.33806e-05	2.89916e-05	1.19203e-05	2.12251e-05	2.20807e-05	1.27254e-05	1.63702e-05	1.55217e-05	1.65244e-05	1.95262e-05	1.2193e-05	1.30599e-05	1.78628e-05	1.19065e-05	2.37208e-05	2.26336e-05	9.44903e-06	1.72649e-05	1.82716	0.869603	3.46773e-06	2.08452	up
meta_297	20-COOH-AA	5.86239e-06	7.63835e-06	5.58108e-06	7.19221e-06	8.54836e-06	6.70962e-06	3.07833e-06	7.12715e-06	9.80605e-06	7.17543e-06	1.0511e-05	9.01228e-06	5.23669e-06	4.09171e-06	4.50887e-06	5.88212e-06	6.77821e-06	5.84564e-06	1.2585e-05	4.99471e-06	1.33214e-05	8.70273e-06	2.96656e-06	1.06759e-05	8.05081e-06	1.39426e-05	7.39307e-06	9.66263e-06	8.76827e-06	9.04906e-06	9.83242e-06	6.6263e-06	1.23074e-05	1.09451e-05	8.63321e-06	9.26676e-06	1.31689e-05	1.87719e-05	6.90826e-06	1.01158e-05	1.46431	0.550221	0.00220016	1.36801	up
meta_298	(±)8(9)-DiHET	9.16037e-07	8.58504e-07	1.20262e-06	8.27684e-07	7.36867e-07	6.74927e-07	1.1117e-06	1.44706e-06	1.03895e-06	1.12041e-06	1.04802e-06	8.87301e-07	9.92505e-07	7.79122e-07	8.94802e-07	7.61096e-07	8.68772e-07	1.02393e-06	6.81533e-07	1.22383e-06	7.86433e-07	2.93016e-06	1.06817e-06	2.06976e-06	1.29298e-06	1.38893e-06	1.59647e-06	1.70933e-06	1.10795e-06	2.24911e-06	1.49322e-06	1.44085e-06	1.31683e-06	1.7232e-06	1.3685e-06	1.49228e-06	1.23587e-06	1.70988e-06	9.54784e-07	1.55444e-06	1.62806	0.70315	7.40547e-05	1.73574	up
meta_299	(±)11(12)-DiHET	9.16037e-07	8.58504e-07	1.20262e-06	8.27684e-07	7.36867e-07	6.74927e-07	1.1117e-06	1.44706e-06	1.03895e-06	1.12041e-06	1.04802e-06	8.87301e-07	9.92505e-07	7.79122e-07	8.94802e-07	7.61096e-07	8.68772e-07	1.02393e-06	6.81533e-07	1.22383e-06	7.86433e-07	2.93016e-06	1.06817e-06	2.06976e-06	1.29298e-06	1.38893e-06	1.59647e-06	1.70933e-06	1.10795e-06	2.24911e-06	1.49322e-06	1.44085e-06	1.31683e-06	1.7232e-06	1.3685e-06	1.49228e-06	1.23587e-06	1.70988e-06	9.54784e-07	1.55444e-06	1.62806	0.70315	7.40547e-05	1.73574	up
meta_304	20-HDoHE	2.7038e-07	3.62557e-07	9.75373e-08	2.5669e-07	4.17669e-07	3.04414e-07	6.88435e-07	2.85004e-07	7.06622e-07	1.86299e-07	2.03627e-07	3.5411e-07	4.15086e-07	7.20871e-07	6.36971e-07	7.74158e-07	5.61883e-07	4.44494e-07	3.03083e-07	4.27717e-07	6.90462e-07	8.89433e-07	4.30757e-07	1.1176e-06	6.40023e-07	2.67771e-07	1.06161e-06	9.29591e-07	6.7662e-07	4.05892e-07	3.60657e-07	3.49391e-07	5.73114e-07	3.41782e-07	6.34022e-07	4.65207e-07	1.22481e-06	4.7581e-07	4.2088e-07	6.40808e-07	1.52254	0.606482	0.0117045	1.21052	up
meta_309	Sorbitol 6-phosphate	1.09203e-05	8.80727e-06	8.43571e-06	8.2065e-06	9.11697e-06	1.1028e-05	8.86219e-06	5.94929e-06	8.49179e-06	6.87136e-06	1.02889e-05	8.7241e-06	7.73702e-06	1.21821e-05	1.11908e-05	1.54829e-05	1.03212e-05	1.17729e-05	5.08137e-06	1.24192e-05	8.32321e-06	1.09657e-05	7.9526e-06	9.79481e-06	9.35462e-06	5.80385e-06	8.21399e-06	6.31309e-06	4.36184e-06	5.25446e-06	1.23278e-05	9.2007e-06	5.86023e-06	4.74274e-06	2.8774e-06	6.01647e-06	6.85426e-06	6.71138e-06	9.5945e-06	7.27384e-06	0.758126	-0.39949	0.00590893	1.08796	down
meta_310	Glu-Gln	3.48513e-05	4.92361e-05	5.38805e-05	3.59719e-05	6.64046e-05	5.49758e-05	2.50639e-05	5.15282e-05	2.67212e-05	5.16903e-05	3.98432e-05	5.25609e-05	3.01461e-05	3.56492e-05	5.28727e-05	3.90874e-05	2.64317e-05	5.6538e-05	2.67428e-05	6.93324e-05	4.03334e-05	2.60404e-05	2.85637e-05	1.94067e-05	4.57987e-05	5.50882e-05	3.54062e-05	2.0798e-05	3.92725e-05	2.36057e-05	2.96311e-05	2.79515e-05	2.29347e-05	4.25089e-05	1.3873e-05	4.32326e-05	1.87646e-05	1.67371e-05	4.39764e-05	3.05526e-05	0.69475	-0.525434	0.00234424	1.35172	down
meta_311	N-Arachidonoyl-L-Alanine	1.87969e-07	4.10003e-07	3.2856e-07	3.82908e-07	3.01817e-07	3.72248e-07	3.85406e-07	3.00486e-07	3.05513e-07	2.96339e-07	5.91115e-07	4.06227e-07	2.00418e-07	2.40006e-07	3.5455e-07	2.3368e-07	2.16671e-07	1.897e-07	2.77813e-07	2.77557e-07	2.11406e-07	1.06185e-06	3.77103e-07	6.57307e-07	5.94241e-07	3.02979e-07	5.58177e-07	5.28289e-07	5.10233e-07	6.5087e-07	3.01431e-07	5.00061e-07	4.18865e-07	3.03377e-07	3.66679e-07	6.32467e-07	6.47436e-07	1.6378e-06	3.12949e-07	5.70032e-07	1.82148	0.865114	0.00483472	1.40878	up
meta_313	Glycerophospho-N-Arachidonoyl Ethanolamine	0.00124384	0.00101678	0.000639512	0.00104317	0.0011551	0.00098658	0.000670545	0.000931907	0.00110033	0.00121359	0.00120098	0.00145323	0.000921276	0.000887675	0.00101897	0.000990683	0.000876448	0.000731692	0.000921435	0.000889008	0.0011438	0.00177762	0.00135944	0.00160143	0.00167194	0.00231282	0.00116631	0.00126141	0.00192392	0.00205139	0.0014165	0.00258231	0.00128865	0.00125202	0.00118311	0.00224856	0.00139098	0.00177921	0.000994638	0.00163397	1.64278	0.716136	8.86375e-06	1.82355	up
meta_316	(R)-3-Hydroxybutanoic acid	4.52242e-05	7.34817e-05	6.26752e-05	3.32938e-05	5.84484e-05	2.14185e-05	4.81132e-05	5.83798e-05	0.000136731	4.23861e-05	5.9937e-05	4.14561e-05	4.60843e-05	2.97496e-05	4.55105e-05	4.72642e-05	7.45378e-05	0.000166888	3.38208e-05	9.50891e-05	8.21193e-05	0.000621516	8.11006e-05	0.000293717	2.97507e-05	0.000132808	0.00011228	7.192e-05	0.000158154	9.30263e-05	4.73689e-05	3.24036e-05	0.000221184	0.000165488	5.44109e-05	5.30867e-05	0.000270007	0.000112661	6.10245e-05	0.000146278	2.39704	1.26125	0.0226439	1.19888	up
meta_318	2-Hydroxyadipic acid	4.92718e-06	6.70614e-06	8.07985e-06	2.40034e-06	4.88413e-06	1.42724e-06	4.04461e-06	5.29838e-06	1.00533e-05	2.76481e-06	7.85379e-06	3.20415e-06	3.85083e-06	4.38357e-06	2.97623e-06	4.80088e-06	6.61968e-06	1.78711e-05	3.49286e-06	9.55497e-06	6.71757e-06	1.82493e-05	6.79255e-06	1.26404e-05	4.07453e-06	1.04484e-05	9.95135e-06	6.01149e-06	1.1028e-05	7.50394e-06	5.09019e-06	3.91961e-06	1.75307e-05	1.25376e-05	4.71313e-06	4.83103e-06	1.32321e-05	9.13466e-06	5.7597e-06	9.13369e-06	1.58579	0.665204	0.0160049	1.14163	up
meta_320	3-(4-Hydroxyphenyl)-1-propanol	8.70686e-08	2.82025e-07	1.37429e-07	3.74044e-07	3.07231e-07	5.53836e-08	1.73881e-07	3.9857e-07	1.55167e-07	3.34907e-07	2.72575e-07	1.81426e-07	2.59708e-07	5.2252e-08	3.80267e-07	6.27921e-07	8.63346e-08	4.31821e-07	3.88507e-07	3.16843e-07	1.75951e-07	2.6004e-07	1.61896e-07	4.35325e-07	5.997e-07	2.88361e-07	3.22939e-07	3.66126e-07	4.72955e-07	3.72552e-07	4.66935e-07	3.30118e-07	3.1577e-07	4.76935e-07	7.76838e-07	3.99093e-07	3.28525e-07	7.92684e-07	2.65168e-07	4.0793e-07	1.53838	0.621415	0.0108308	1.0908	up
meta_326	D-Galacturonic Acid	5.16853e-06	8.52179e-06	6.44672e-06	6.26275e-06	9.09767e-06	7.47954e-06	1.59514e-06	8.90724e-06	4.25419e-06	6.6052e-06	3.44576e-06	1.03217e-05	7.34376e-06	4.95953e-06	5.37924e-06	6.73856e-06	5.59148e-06	6.22978e-06	6.58746e-06	5.15482e-06	1.89896e-05	1.77554e-05	1.62624e-05	1.52393e-05	1.02097e-05	1.98254e-05	1.48323e-05	1.1816e-05	1.95989e-05	2.76464e-05	1.15168e-05	8.07625e-06	1.40012e-05	1.35067e-05	1.33318e-05	1.35489e-05	2.85126e-05	2.22745e-05	6.30454e-06	1.64969e-05	2.61667	1.38773	3.09027e-07	2.13343	up
meta_327	D-Tagatose	6.25546e-06	6.4367e-06	1.38632e-05	1.03347e-05	9.32401e-06	8.50954e-06	7.20271e-06	1.20775e-05	8.54024e-06	1.02797e-05	8.20535e-06	8.27368e-06	1.26057e-05	7.78254e-06	7.56111e-06	1.00102e-05	7.05732e-06	6.0217e-06	1.19639e-05	8.23989e-06	2.1048e-05	2.34732e-05	2.3965e-05	1.37461e-05	1.17388e-05	2.90795e-05	2.32932e-05	1.4982e-05	2.26832e-05	3.29476e-05	1.2963e-05	1.03242e-05	1.69139e-05	1.50042e-05	1.33053e-05	1.69571e-05	2.48177e-05	1.89934e-05	9.02725e-06	1.92353e-05	2.1308	1.0914	1.94952e-06	2.01978	up
meta_328	GalactinolHydrate	0.000446287	0.000771373	0.000698014	0.000317027	0.00058486	0.000200073	0.00048103	0.000644316	0.00148892	0.000439982	0.000595993	0.00043397	0.000457905	0.000313604	0.000463423	0.000499666	0.000733599	0.00177816	0.000364032	0.000992504	0.000837261	0.00642651	0.000922889	0.00306045	0.00030254	0.00139134	0.00115993	0.000780838	0.00165691	0.000951196	0.000499644	0.000336881	0.00222221	0.00167159	0.000578331	0.000543859	0.00273554	0.00115912	0.000635237	0.00151317	2.38205	1.25221	0.0228315	1.19431	up
meta_330	Val-Ala	2.66914e-05	2.5765e-05	2.25221e-05	2.44615e-05	5.39725e-05	2.78336e-05	2.78501e-05	2.91488e-05	3.73915e-05	2.77034e-05	3.59574e-05	3.57086e-05	3.12582e-05	2.83291e-05	2.86991e-05	3.62413e-05	2.96125e-05	3.68684e-05	2.88085e-05	2.92578e-05	3.91242e-05	3.60528e-05	3.50131e-05	3.37501e-05	6.43374e-05	3.57256e-05	4.82125e-05	2.98087e-05	4.07469e-05	4.02753e-05	3.51584e-05	3.50983e-05	3.90363e-05	3.68775e-05	3.9337e-05	3.02489e-05	4.35468e-05	5.87533e-05	3.1204e-05	4.00613e-05	1.28385	0.360476	0.00193571	1.35114	up
meta_333	Octadecanedioic acid	9.09829e-05	0.000142936	0.00018556	6.01176e-05	0.000102515	6.60406e-05	0.000103003	0.000122309	0.000121614	5.82182e-05	0.000135139	0.000112207	0.000105789	8.65721e-05	6.68956e-05	6.31927e-05	0.000226465	0.00014861	7.21876e-05	0.00016282	0.00010656	0.000281902	0.000132948	0.000310179	5.51368e-05	0.000123727	0.000186069	0.000180063	0.000153037	0.000219646	0.000146659	0.000119526	9.0376e-05	0.000201356	0.000126746	0.000107457	0.000164434	0.000160752	0.000111659	0.000159254	1.42626	0.512236	0.0139504	1.18296	up
meta_338	Phosphatidylethanolamine lyso alkenyl 16:0	2.0356e-05	1.92012e-05	1.2693e-05	2.32919e-05	1.65931e-05	1.63129e-05	1.74201e-05	1.9902e-05	3.2797e-05	2.0126e-05	1.79064e-05	1.86291e-05	2.10064e-05	1.83141e-05	1.95677e-05	2.20415e-05	2.23524e-05	1.55429e-05	3.52147e-05	2.03905e-05	2.80464e-05	2.95641e-05	2.53499e-05	2.94717e-05	2.89325e-05	2.79283e-05	2.76716e-05	3.36893e-05	3.36271e-05	4.35067e-05	3.23145e-05	4.14539e-05	3.11224e-05	4.04135e-05	3.45487e-05	4.30944e-05	3.00697e-05	3.60934e-05	2.04829e-05	3.3161e-05	1.61896	0.695065	2.60555e-08	2.00383	up
meta_339	LPA(16:0/0:0)	0.000245889	0.000253738	0.000217458	0.000251378	0.000295706	0.000245118	0.000286158	0.000243556	0.000344686	0.000301195	0.000277804	0.000274213	0.000315154	0.000246568	0.000236171	0.000259717	0.000247185	0.000199489	0.000621516	0.000299924	0.000424047	0.000350415	0.000579366	0.000416037	0.000407026	0.000516384	0.000361159	0.000397935	0.000499833	0.000579842	0.00032228	0.000886419	0.000546181	0.000731028	0.000412632	0.000665778	0.000349341	0.000722194	0.000283131	0.000509328	1.79891	0.847123	1.3285e-05	1.80115	up
meta_341	3-hydroxy-tetradecanoic acid	2.44188e-05	1.4128e-05	2.84601e-05	1.5274e-05	1.57234e-05	1.3082e-05	1.81305e-05	1.15541e-05	7.46873e-05	1.21963e-05	2.44323e-05	1.68091e-05	2.45781e-05	1.43296e-05	2.21453e-05	3.03054e-05	1.80392e-05	3.03786e-05	1.68871e-05	3.08028e-05	3.35975e-05	7.08941e-05	4.70863e-05	8.17141e-05	2.68263e-05	4.60484e-05	7.47534e-05	4.82847e-05	6.10843e-05	5.05959e-05	2.71536e-05	3.38246e-05	3.14255e-05	5.22691e-05	4.50512e-05	3.64253e-05	5.02463e-05	8.29311e-05	2.28181e-05	5.00118e-05	2.19176	1.13209	1.1005e-05	1.84005	up
meta_342	Glu-Val	4.87576e-05	4.6363e-05	3.82943e-05	3.9337e-05	6.26135e-05	3.79375e-05	7.02439e-05	3.80617e-05	4.52625e-05	7.37926e-05	5.52392e-05	5.62169e-05	3.18106e-05	3.83943e-05	4.27996e-05	4.30641e-05	3.94784e-05	6.01441e-05	4.99403e-05	4.48103e-05	8.47026e-05	6.18787e-05	5.01681e-05	8.05776e-05	7.88397e-05	4.86247e-05	6.32072e-05	4.50248e-05	9.43111e-05	8.35114e-05	7.14163e-05	5.02347e-05	5.37938e-05	8.64832e-05	5.45118e-05	8.91246e-05	0.000117778	8.31514e-05	4.81281e-05	7.20744e-05	1.49756	0.582609	0.000122474	1.57462	up
meta_343	N-Acetyl-5-aminosalicylic acid	5.25512e-07	8.93456e-07	1.19836e-06	1.38916e-06	7.21657e-07	4.55718e-07	4.69661e-07	1.2191e-06	9.14855e-07	8.35879e-07	9.35948e-07	8.44827e-07	8.85223e-07	8.73943e-07	6.31962e-07	9.92236e-07	8.04568e-07	9.59425e-07	8.37699e-07	4.55943e-07	6.94038e-07	5.35417e-07	1.11404e-06	1.77309e-07	1.3062e-06	6.8478e-07	1.2016e-06	1.29828e-06	1.17126e-06	1.52807e-06	2.0078e-06	6.90726e-07	1.13388e-06	1.5175e-06	1.07796e-06	7.82669e-07	2.68624e-06	2.40802e-06	8.42257e-07	1.2231e-06	1.45217	0.538209	0.0279101	1.04696	up
meta_345	LPA(18:1/0:0)	1.02803e-05	1.0415e-05	7.51877e-06	1.02985e-05	9.96699e-06	7.09599e-06	8.4265e-06	9.70135e-06	1.18837e-05	8.13026e-06	7.21863e-06	7.71375e-06	9.80039e-06	7.98777e-06	6.1304e-06	7.76117e-06	7.75451e-06	7.79424e-06	1.48403e-05	5.94103e-06	1.47533e-05	1.44643e-05	1.35807e-05	1.13987e-05	1.26288e-05	1.88593e-05	1.20816e-05	1.17514e-05	1.41688e-05	2.08809e-05	1.77831e-05	1.99093e-05	1.4053e-05	1.49362e-05	1.76496e-05	1.57123e-05	1.11635e-05	1.3605e-05	8.83298e-06	1.49655e-05	1.69428	0.760672	3.42166e-08	1.9595	up
meta_346	D-Allose	6.25546e-06	6.4367e-06	1.38632e-05	1.03347e-05	9.32401e-06	8.50954e-06	7.20271e-06	1.20775e-05	8.54024e-06	1.02797e-05	8.20535e-06	8.27368e-06	1.26057e-05	7.78254e-06	7.56111e-06	1.00102e-05	7.05732e-06	6.0217e-06	1.19639e-05	8.23989e-06	2.1048e-05	2.34732e-05	2.3965e-05	1.37461e-05	1.17388e-05	2.90795e-05	2.32932e-05	1.4982e-05	2.26832e-05	3.29476e-05	1.2963e-05	1.03242e-05	1.69139e-05	1.50042e-05	1.33053e-05	1.69571e-05	2.48177e-05	1.89934e-05	9.02725e-06	1.92353e-05	2.1308	1.0914	1.94952e-06	2.01978	up
meta_347	Hydroxypiperazic acid	4.01254e-05	4.74898e-05	4.61848e-05	4.65525e-05	5.2016e-05	6.7233e-05	4.08959e-05	3.76633e-05	4.5082e-05	4.81937e-05	4.53936e-05	5.50464e-05	3.61569e-05	5.30711e-05	5.36738e-05	5.55223e-05	5.31031e-05	5.37682e-05	3.58323e-05	5.15301e-05	3.70362e-05	3.57226e-05	3.00819e-05	2.90916e-05	4.36698e-05	2.85216e-05	3.87685e-05	2.78124e-05	3.88938e-05	2.97026e-05	5.36113e-05	4.31011e-05	3.31271e-05	5.89166e-05	3.6707e-05	4.79637e-05	2.75403e-05	3.12493e-05	4.82267e-05	3.73065e-05	0.773566	-0.370404	0.000387777	1.55182	down
meta_350	2-Deoxyribose-5'-phosphate	2.1698e-05	1.45988e-05	1.6999e-05	2.29517e-05	1.81047e-05	1.29774e-05	1.94028e-05	1.50985e-05	1.41879e-05	2.80245e-05	2.74939e-05	2.16676e-05	1.59689e-05	1.70535e-05	2.40492e-05	1.86758e-05	2.20171e-05	2.14666e-05	2.53174e-05	2.0478e-05	2.39798e-05	2.42531e-05	2.46465e-05	2.71628e-05	2.87991e-05	1.74e-05	2.82711e-05	2.64934e-05	2.9252e-05	1.99789e-05	2.41971e-05	1.98243e-05	2.46549e-05	2.44377e-05	2.08347e-05	2.68531e-05	2.40906e-05	2.46258e-05	1.99116e-05	2.44308e-05	1.22697	0.295096	0.00086025	1.35627	up
meta_356	Phosphatidylethanolamine lyso alkenyl 18:2	4.87017e-05	4.08412e-05	1.57662e-05	4.68914e-05	5.33346e-05	4.8356e-05	2.40406e-05	2.78961e-05	5.58323e-05	4.67151e-05	5.90372e-05	6.6608e-05	4.82866e-05	2.34266e-05	2.68962e-05	2.98888e-05	6.06485e-05	3.56542e-05	5.73208e-05	2.8794e-05	0.000123842	8.05036e-05	5.96884e-05	4.62388e-05	6.65344e-05	0.000159711	3.86465e-05	5.57189e-05	5.1502e-05	9.87328e-05	3.0036e-05	8.8278e-05	3.60079e-05	8.45549e-05	6.9742e-05	9.99483e-05	5.86727e-05	4.14055e-05	4.22468e-05	7.16536e-05	1.69607	0.762197	0.00231302	1.23342	up
meta_357	2-Octanamidoacetic acid	2.71307e-06	2.69049e-06	2.96929e-06	2.83389e-06	2.59403e-06	2.54572e-06	3.06901e-06	3.08646e-06	2.535e-06	2.59214e-06	2.51984e-06	2.51717e-06	2.33505e-06	3.24276e-06	2.63866e-06	2.65566e-06	2.47405e-06	2.58437e-06	2.64996e-06	2.88138e-06	3.46653e-06	3.69704e-06	2.79207e-06	2.9526e-06	2.94945e-06	2.91353e-06	2.76106e-06	2.81878e-06	3.0848e-06	3.85082e-06	2.84905e-06	3.14759e-06	3.25422e-06	3.46188e-06	3.04252e-06	3.70777e-06	3.83825e-06	3.22667e-06	2.7064e-06	3.21192e-06	1.18679	0.247062	3.16193e-05	1.63425	up
meta_359	Glycine	3.68281e-06	2.52264e-06	5.10655e-06	4.94894e-06	3.93078e-06	4.73725e-06	5.11206e-06	4.07406e-06	2.91559e-06	3.62872e-06	5.62485e-06	4.76382e-06	5.47168e-06	9.09889e-06	5.08472e-06	4.19045e-06	3.47668e-06	5.59825e-06	6.17659e-06	2.70492e-06	3.54513e-06	3.6236e-06	2.99157e-06	3.71117e-06	2.66421e-06	3.1515e-06	6.64118e-06	2.41881e-06	3.91509e-06	2.96384e-06	2.35657e-06	4.84774e-06	4.42289e-06	2.27223e-06	2.5961e-06	3.80031e-06	2.41604e-06	2.04274e-06	4.64251e-06	3.35448e-06	0.722558	-0.468815	0.00447681	1.08344	down
meta_360	L-Tyrosine	0.0103093	0.012419	0.0124107	0.0117858	0.0101159	0.0107677	0.0101703	0.00996939	0.0118388	0.0118104	0.0135126	0.00999571	0.0101079	0.011803	0.0102786	0.0118936	0.0128288	0.0123694	0.00851954	0.00976229	0.00878287	0.0106656	0.0108516	0.00937597	0.0105191	0.00886939	0.0106902	0.00857826	0.0118754	0.00710456	0.0122892	0.00830107	0.0107291	0.0111129	0.0115907	0.00581961	0.00998037	0.0114971	0.0111334	0.00992405	0.891374	-0.165897	0.02161	1.00121	down
meta_361	L-Lysine	0.00360778	0.00416158	0.00312484	0.00280828	0.00328566	0.00221876	0.00334181	0.00220884	0.00311485	0.0035119	0.0031069	0.0029424	0.00244261	0.00286153	0.0029632	0.0031195	0.00294919	0.00247934	0.00261202	0.00303654	0.00347244	0.00299216	0.00207718	0.00308921	0.0029078	0.00212556	0.00248196	0.00222817	0.00243311	0.00244212	0.00304052	0.00242285	0.00189944	0.00278883	0.00288055	0.00297845	0.00303614	0.00260086	0.00299488	0.00266096	0.888506	-0.170547	0.0277507	1.04376	down
meta_364	L-Histidine	0.00286111	0.00258876	0.0021673	0.00211451	0.00258693	0.00214975	0.00247742	0.00214311	0.00191142	0.00235174	0.00239837	0.0017629	0.00216465	0.00222345	0.00220398	0.00323459	0.00215789	0.00291827	0.00202547	0.00213842	0.00173056	0.00188355	0.00227421	0.00173607	0.00183545	0.00147616	0.00241219	0.00228858	0.00190631	0.00165053	0.00160124	0.00158355	0.00195062	0.00181714	0.00162608	0.00201931	0.00167597	0.00246884	0.002329	0.00188535	0.809511	-0.304877	0.000193984	1.43754	down
meta_366	L-Phenylalanine	0.047135	0.0479997	0.0577381	0.0492252	0.0494483	0.0553525	0.0561704	0.052384	0.0484034	0.0488034	0.0483242	0.0427945	0.0573854	0.0536466	0.0535654	0.0532437	0.0558427	0.0510059	0.045044	0.0616288	0.0459219	0.0464694	0.0444565	0.0413445	0.0473003	0.0463274	0.0503295	0.0478608	0.0422517	0.0427554	0.0514372	0.0389866	0.0479006	0.0455164	0.0414083	0.0402638	0.0527716	0.0428859	0.0517571	0.0453438	0.876089	-0.190851	5.60012e-05	1.49011	down
meta_370	5-Oxoproline	0.000915301	0.000878432	0.00172161	0.001437	0.00104815	0.00125037	0.00103835	0.00105357	0.0012457	0.000544504	0.00125261	0.000791525	0.000664081	0.00103517	0.000941682	0.00146251	0.00094952	0.000753228	0.00103335	0.000829222	0.00072054	0.00090737	0.000523267	0.000665019	0.00116636	0.000324761	0.000450556	0.000396051	0.000306834	0.000547466	0.000995609	0.000796539	0.00113663	0.000508582	0.000582027	0.000688375	0.000549053	0.00063904	0.00104229	0.000661338	0.634502	-0.656304	0.000113219	1.58727	down
meta_371	Glyc-Pro	1.51949e-05	1.24838e-05	1.95776e-05	1.62241e-05	1.84063e-05	1.71145e-05	1.62556e-05	1.90478e-05	1.3638e-05	1.79797e-05	1.60878e-05	1.33149e-05	1.29115e-05	1.9896e-05	2.06075e-05	1.73391e-05	1.77672e-05	2.03708e-05	1.53684e-05	1.84031e-05	1.30628e-05	1.0008e-05	1.50382e-05	7.61078e-06	1.08863e-05	1.31362e-05	1.24763e-05	1.30654e-05	1.21197e-05	9.04548e-06	1.11482e-05	1.13298e-05	1.29664e-05	8.69349e-06	9.65659e-06	8.07327e-06	1.2577e-05	1.39941e-05	1.68994e-05	1.13827e-05	0.673553	-0.570136	1.24008e-08	1.90868	down
meta_375	Nα-Acetyl-L-Arginine	2.45369e-05	2.68984e-05	2.86103e-05	3.56547e-05	2.95063e-05	2.65819e-05	3.09012e-05	2.6486e-05	2.68799e-05	2.58809e-05	3.11352e-05	2.89338e-05	2.85984e-05	3.44906e-05	3.25801e-05	2.84389e-05	3.43565e-05	3.71082e-05	2.53338e-05	2.9956e-05	2.09232e-05	2.48016e-05	2.93826e-05	2.05544e-05	2.34293e-05	2.68798e-05	3.39602e-05	1.97963e-05	2.34242e-05	2.22513e-05	2.38086e-05	1.90581e-05	1.9909e-05	2.01665e-05	1.83585e-05	1.99926e-05	2.41344e-05	1.87043e-05	2.96434e-05	2.27519e-05	0.767521	-0.381722	3.95464e-06	1.66506	down
meta_379	Urea	0.00300953	0.00345212	0.0019133	0.0028778	0.00323554	0.0032132	0.00283756	0.00356695	0.00326154	0.00427221	0.00297354	0.0027304	0.00278984	0.00330655	0.00262987	0.00355563	0.00270846	0.00346434	0.00274914	0.00304628	0.00331498	0.00278913	0.00241491	0.00208567	0.00246012	0.00166583	0.0023497	0.00208437	0.00244666	0.00263983	0.00346465	0.00148156	0.00162797	0.002571	0.00297251	0.00206597	0.00190372	0.00290469	0.00307969	0.0024024	0.78008	-0.358306	0.00035472	1.50669	down
meta_386	2-Hydroxy-6-Aminopurine	6.09841e-06	3.80711e-06	4.95873e-06	1.83912e-06	2.52488e-06	6.07008e-06	4.07081e-06	3.44639e-06	2.19632e-06	2.53885e-06	1.9267e-06	1.68881e-06	2.79408e-06	2.88376e-06	1.57159e-06	9.08784e-06	2.23627e-06	5.13565e-06	6.66825e-07	6.39281e-06	1.95634e-06	3.03258e-06	2.38578e-06	1.16004e-06	9.09808e-07	1.15887e-06	4.25488e-06	6.10112e-06	3.81249e-07	1.91509e-07	1.55334e-06	3.60321e-07	2.89887e-07	1.86615e-07	2.84826e-07	3.23262e-07	9.30672e-07	3.88189e-07	3.59675e-06	1.43607e-06	0.399269	-1.32457	0.00106913	1.35943	down
meta_389	Adenosine	1.71908e-05	1.61664e-05	1.79404e-05	1.98386e-05	1.90696e-05	1.3782e-05	1.01663e-05	1.33908e-05	1.13789e-05	6.52803e-06	2.52943e-05	1.07252e-05	1.49503e-05	1.14362e-05	1.45837e-05	1.65061e-05	8.4189e-06	5.5254e-06	9.45759e-06	6.23897e-06	1.29239e-05	8.64099e-06	1.03628e-05	1.52492e-05	1.33491e-05	1.46754e-05	1.41335e-05	1.30045e-05	6.91389e-06	8.08138e-06	3.0876e-06	5.92909e-06	9.13026e-06	1.08322e-05	8.84083e-06	6.61044e-06	1.18263e-05	7.33419e-06	1.34294e-05	1.00514e-05	0.748463	-0.417998	0.02153	1.02253	down
meta_391	Deoxyguanosine	1.71908e-05	1.61664e-05	1.79404e-05	1.98386e-05	1.90696e-05	1.3782e-05	1.01663e-05	1.33908e-05	1.13789e-05	6.52803e-06	2.52943e-05	1.07252e-05	1.49503e-05	1.14362e-05	1.45837e-05	1.65061e-05	8.4189e-06	5.5254e-06	9.45759e-06	6.23897e-06	1.29239e-05	8.64099e-06	1.03628e-05	1.52492e-05	1.33491e-05	1.46754e-05	1.41335e-05	1.30045e-05	6.91389e-06	8.08138e-06	3.0876e-06	5.92909e-06	9.13026e-06	1.08322e-05	8.84083e-06	6.61044e-06	1.18263e-05	7.33419e-06	1.34294e-05	1.00514e-05	0.748463	-0.417998	0.02153	1.02253	down
meta_392	Guanosine	0.000234767	0.000216791	0.000354123	0.000114105	0.000168357	0.000159305	0.000148217	6.21688e-05	0.000102512	0.000141215	8.90266e-05	0.000139125	9.51103e-05	0.000131449	0.000101334	0.000260399	0.000131986	0.000265009	7.74179e-06	0.000141842	0.00015942	0.000167181	6.95083e-05	0.000166005	4.77315e-05	3.50409e-05	0.000181591	0.000167442	3.99591e-05	1.57738e-05	3.59189e-05	1.0181e-05	1.19645e-09	5.2029e-06	4.81883e-06	5.59931e-06	8.09336e-05	3.65026e-05	0.000153229	6.82673e-05	0.445524	-1.16643	0.00107662	1.36305	down
meta_393	Purine	0.000215659	0.000210127	0.000260852	0.000241741	0.000204633	0.000217036	0.000233826	0.000196006	0.000245372	0.000222426	0.000225191	0.000198847	0.000189282	0.000208536	0.000212797	0.00021577	0.000228053	0.000211221	0.000202912	0.000211267	0.000199146	0.000199248	0.000169563	0.000195067	0.000214031	0.000165353	0.000187155	0.00021819	0.000199878	0.000176879	0.000226076	0.000153638	0.000178192	0.000172976	0.000175664	0.000160793	0.000248616	0.00018608	0.000217578	0.000190364	0.874922	-0.192774	0.000549859	1.4258	down
meta_395	Uracil	0.000184769	0.000177549	0.00015912	0.000174289	0.000128276	0.000156215	0.000210739	0.00015869	0.000242296	0.000168722	0.000153555	0.00015162	0.000147837	0.000189444	0.000158258	0.000182157	0.000200451	0.000150524	0.000136304	0.000172658	0.00015134	0.000169456	0.000166348	0.000123418	0.000121673	0.000107372	0.000172486	0.000224466	0.00012683	8.46989e-05	0.000100691	0.000146264	0.000113825	0.000106746	0.000165913	0.000157259	0.00013303	0.000131082	0.000170174	0.00013905	0.817106	-0.291405	0.00364355	1.27204	down
meta_396	D-Fructose	0.00336604	0.00320081	0.00334166	0.00310617	0.00303841	0.00305783	0.00324049	0.00328539	0.00242186	0.00303205	0.00291099	0.00260644	0.00309951	0.00465944	0.00326445	0.0031211	0.00313801	0.00347648	0.00255039	0.00320276	0.0023388	0.00241101	0.00248869	0.00247687	0.0023205	0.00235339	0.00303361	0.00272028	0.00220372	0.0020965	0.00218143	0.00197094	0.00245366	0.00192197	0.00212472	0.00183854	0.00221637	0.0021351	0.00315601	0.00229367	0.726762	-0.460445	3.70667e-08	1.93831	down
meta_397	D-Gluconic Acid	0.000106626	0.000109796	0.000119246	0.000111479	0.00011138	0.00011309	0.000117805	0.000118943	0.000107856	0.000109698	0.000115519	9.69976e-05	0.000115107	0.000121188	0.000121183	0.000130916	0.000104446	0.000123826	0.000102187	0.000127477	8.93467e-05	0.000102473	0.000108913	8.74204e-05	9.67003e-05	8.88271e-05	0.000118652	0.000100602	8.96473e-05	9.0309e-05	9.88376e-05	8.90429e-05	9.09822e-05	8.34373e-05	9.62076e-05	8.52871e-05	0.000100721	0.00010019	0.000114238	9.5422e-05	0.835289	-0.259652	1.29956e-07	1.83196	down
meta_399	Nicotinuric Acid	2.0959e-05	1.93994e-05	2.68525e-05	1.25052e-05	1.95226e-06	2.19858e-05	2.03402e-05	2.00211e-05	1.09756e-05	1.76087e-05	9.61511e-06	2.66867e-05	2.46643e-05	2.15661e-05	5.45584e-06	3.28699e-05	2.80508e-05	1.3088e-05	2.08092e-05	2.79901e-05	2.8678e-05	2.24919e-05	3.71277e-05	2.09222e-05	2.94411e-05	1.42329e-05	2.97216e-05	2.26336e-05	1.46982e-05	2.91293e-05	4.13446e-05	2.31607e-05	2.68311e-05	2.53449e-05	3.05803e-05	1.74838e-05	4.72293e-05	2.78081e-05	1.91698e-05	2.71589e-05	1.41675	0.502588	0.00566355	1.16198	up
meta_402	5-Hydroxytryptophol	8.37447e-05	6.20781e-05	7.74466e-05	5.3764e-05	8.09179e-05	6.72274e-05	8.09024e-05	6.8891e-05	6.29474e-05	6.36291e-05	5.52095e-05	6.36361e-05	6.9635e-05	6.62392e-05	3.78246e-05	5.30043e-05	6.18573e-05	6.73609e-05	5.44712e-05	7.78844e-05	4.48425e-05	4.57805e-05	4.48577e-05	4.68138e-05	4.40835e-05	4.23514e-05	6.19278e-05	4.29536e-05	5.12107e-05	4.51526e-05	4.32937e-05	4.6471e-05	4.42714e-05	3.88776e-05	4.27781e-05	5.43179e-05	4.58229e-05	3.47532e-05	6.54336e-05	4.55867e-05	0.696686	-0.521419	1.57796e-07	1.9675	down
meta_403	4-Guanidinobutyric Acid	0.000306311	0.000423762	0.000696631	0.000413794	0.000436028	0.000459853	0.000351139	0.000475775	0.000411417	0.000388436	0.00038538	0.000284585	0.000507476	0.000437321	0.00036319	0.000284477	0.000391975	0.000454875	0.000289055	0.000521738	0.000302038	0.000201041	0.000243744	0.000156873	0.000364833	0.000341471	0.000263639	0.000266514	0.000359222	0.000277243	0.000403976	0.000140973	0.000177367	0.000231196	0.000223585	0.000214175	0.000324197	0.00014556	0.000414161	0.000257647	0.622094	-0.684796	3.63893e-06	1.81435	down
meta_405	7-Methyluric Acid	9.43868e-05	6.59007e-05	7.48352e-05	6.89675e-05	8.58977e-05	6.08193e-05	8.45678e-05	9.19292e-05	5.75111e-05	6.08259e-05	5.56702e-05	6.06124e-05	6.75042e-05	8.77307e-05	7.40601e-05	7.56829e-05	6.8838e-05	7.76131e-05	6.64203e-05	7.93634e-05	5.38015e-05	5.71188e-05	5.48342e-05	5.49611e-05	4.38807e-05	6.14998e-05	8.94416e-05	4.97879e-05	4.50548e-05	4.45545e-05	6.97665e-05	5.01018e-05	8.46105e-05	5.88733e-05	5.7992e-05	4.85357e-05	5.88261e-05	4.78351e-05	7.29568e-05	5.73042e-05	0.785454	-0.348402	0.000365431	1.39513	down
meta_406	Creatinine	8.05808e-05	0.000154569	0.000175671	0.000112045	0.00015182	0.000167899	8.7549e-05	8.65038e-05	0.000135193	0.000122994	0.000122028	0.000150929	0.00014505	9.51057e-05	9.53047e-05	6.40243e-05	0.000142305	0.000110939	9.92391e-05	0.000115506	0.000122616	7.52693e-05	5.47023e-05	7.34657e-05	0.000133184	5.16891e-05	6.40716e-05	8.64988e-05	8.13279e-05	8.55083e-05	0.000115903	6.10603e-05	8.23877e-05	9.45887e-05	0.000110223	0.00011407	0.000123611	8.29261e-05	0.000120763	8.96168e-05	0.74209	-0.430335	0.00166798	1.38016	down
meta_408	Guanidineacetic Acid	7.18407e-06	8.58048e-06	9.99419e-06	7.8876e-06	1.19166e-05	1.34372e-05	6.77357e-06	4.94198e-06	4.98751e-06	9.61958e-06	8.75201e-06	8.92462e-06	1.31299e-05	5.55071e-06	8.42811e-06	5.19361e-06	6.11661e-06	1.20141e-05	9.47373e-06	8.38598e-06	7.30343e-06	5.22848e-06	5.27567e-06	6.704e-06	1.06263e-05	8.77088e-06	4.30843e-06	5.43238e-06	7.29541e-06	7.87959e-06	5.00591e-06	6.60954e-06	8.47673e-06	6.83353e-06	5.33412e-06	7.93746e-06	3.92041e-06	3.96611e-06	8.56461e-06	6.49491e-06	0.758343	-0.399078	0.00743557	1.14742	down
meta_413	LPC(0:0/14:0)	0.00172339	0.00179779	0.00151327	0.00163935	0.00220071	0.00208286	0.00193242	0.00222721	0.00164833	0.00186893	0.00193778	0.00302809	0.00176364	0.00235302	0.00310862	0.00178877	0.00140826	0.000878394	0.0058808	0.00168499	0.00323702	0.000712386	0.00506202	0.00323211	0.00261362	0.00643727	0.00267031	0.00296273	0.00387418	0.00301883	0.00308074	0.00416741	0.00298382	0.00295963	0.00289241	0.0040871	0.00147082	0.00366253	0.00212333	0.00328472	1.54696	0.62944	0.00366838	1.23603	up
meta_414	LPC(16:0/0:0)	0.0658265	0.0648025	0.0679619	0.0659548	0.0667571	0.0666107	0.0698246	0.068697	0.0621395	0.0655474	0.064439	0.0608013	0.0685418	0.0706362	0.0677231	0.0657906	0.0690968	0.0678283	0.0647	0.0721929	0.0640084	0.0613912	0.0675352	0.0613831	0.0648286	0.0641787	0.0704643	0.0600262	0.0635542	0.0629999	0.0636407	0.0631911	0.0665055	0.065329	0.061968	0.0607797	0.0647066	0.0652367	0.0667936	0.0639848	0.957949	-0.0619794	0.00243374	1.14651	down
meta_417	Taurocholic Acid Sodium Salt Hydrate	0.000859932	0.000939558	0.00095552	0.000871405	0.000798753	0.000839623	0.000934271	0.000863935	0.000751754	0.000760145	0.00074694	0.000643695	0.000760856	0.000885788	0.000826892	0.000872544	0.0007937	0.000806136	0.000643572	0.000841651	0.000594813	0.000567379	0.000624955	0.000484428	0.000561192	0.000570407	0.000649211	0.00061359	0.000513728	0.000449512	0.000547835	0.000444909	0.000581715	0.000569648	0.000552081	0.000452023	0.000550093	0.000499587	0.000819834	0.00054595	0.665928	-0.586561	3.19669e-13	2.33884	down
meta_418	4-(Aminomethyl)-5-(Hydroxymethyl)-2-Methylpyridin-3-Ol	2.90072e-05	3.53702e-05	3.62614e-05	3.74952e-05	2.65058e-05	3.42247e-05	3.4587e-05	4.27432e-05	3.18571e-05	2.9333e-05	3.45914e-05	2.30085e-05	3.77703e-05	4.55409e-05	3.96362e-05	2.88845e-05	4.15666e-05	3.59684e-05	2.84253e-05	4.4249e-05	2.04472e-05	2.54567e-05	2.5769e-05	1.6814e-05	2.06302e-05	2.38052e-05	2.21283e-05	1.92172e-05	2.14419e-05	1.36842e-05	2.4182e-05	2.14392e-05	2.5079e-05	1.79288e-05	1.61334e-05	1.38966e-05	2.29169e-05	1.61828e-05	3.48513e-05	2.03974e-05	0.585269	-0.772829	4.39708e-10	2.06136	down
meta_419	N-Acetylglycine	0.00592599	0.00526582	0.00602959	0.00456418	0.00570038	0.00628302	0.00769749	0.0105585	0.00527713	0.0068862	0.00576266	0.00519683	0.00486373	0.00591794	0.00588788	0.00832095	0.00484694	0.00487779	0.00477763	0.00547059	0.00435458	0.00545698	0.00401024	0.00316523	0.00589823	0.00426303	0.00393145	0.0047236	0.00443822	0.00494702	0.00612085	0.00291499	0.00569804	0.00509919	0.00562273	0.00290007	0.00425156	0.00481617	0.00600556	0.00458956	0.764218	-0.387943	0.00109953	1.3696	down
meta_425	Sarcosine	0.000240442	0.000225072	0.00028124	0.000229625	0.000247677	0.000257874	0.000251789	0.000244482	0.000207713	0.000235323	0.000239864	0.000229628	0.000260453	0.000258992	0.000242073	0.000228411	0.000234082	0.000256874	0.000200139	0.000278812	0.000123666	0.000125005	0.000132074	0.000135499	0.000137308	0.000128079	0.000154991	0.000141521	0.000123273	9.86129e-05	0.000135817	0.000107767	0.0001246	0.000115581	0.000143069	9.81496e-05	0.000113898	0.000113214	0.000242528	0.000125118	0.51589	-0.954864	8.32653e-21	2.45883	down
meta_429	N-Formylmethionine	5.97297e-06	6.32454e-06	1.62064e-05	1.54123e-05	9.08025e-06	1.08387e-05	5.52591e-06	8.73698e-06	5.69357e-06	1.162e-05	9.91681e-06	5.70293e-06	1.13932e-05	4.30105e-06	9.28194e-06	1.33976e-05	1.62849e-05	4.22684e-06	6.42689e-06	7.40912e-06	2.71008e-06	3.54432e-06	9.50877e-06	5.69244e-06	5.54745e-06	3.16241e-06	2.64502e-06	1.59476e-05	4.43328e-06	6.81318e-06	4.43712e-07	1.31827e-06	4.49507e-06	4.12019e-06	4.77986e-06	9.68754e-06	2.73609e-06	4.96508e-06	9.18764e-06	5.14169e-06	0.559631	-0.837453	0.00204743	1.25729	down
meta_430	Sn-Glycero-3-Phosphocholine	0.000279966	0.000231463	0.000128683	0.000209269	0.000292651	0.000242902	0.000306406	0.000234969	0.000229977	0.000162705	0.000251106	0.000234419	0.000292634	0.000221553	0.000305297	0.000181751	0.000252508	0.000137648	0.000393939	0.000171536	0.000284194	0.000223099	0.000398963	0.000334231	0.000450192	0.000329173	0.000292768	0.00028059	0.000341971	0.000690746	0.000163707	0.000443892	0.000420128	0.000434928	0.000390166	0.000529882	0.00037432	0.000441535	0.000238069	0.000379138	1.59255	0.671343	0.000139829	1.62162	up
meta_431	Indole	0.00118119	0.0013755	0.00131422	0.00104591	0.00136811	0.00103059	0.00119698	0.000971694	0.00113036	0.00131811	0.00124812	0.00119646	0.00109606	0.00110075	0.00109314	0.00109013	0.00134016	0.00113937	0.00119471	0.00116848	0.000806193	0.000771735	0.000866981	0.000869169	0.0010652	0.000741225	0.000965678	0.00111391	0.000892812	0.000894168	0.000850309	0.000862692	0.000762393	0.000919042	0.000903522	0.000824306	0.000921045	0.000685378	0.00118	0.000873098	0.739912	-0.434575	4.16831e-10	2.11991	down
meta_438	L-Norleucine	0.00254421	0.0032668	0.00280824	0.00225424	0.00306119	0.00231246	0.00271484	0.00214767	0.00241678	0.00280016	0.00274737	0.00256878	0.00228741	0.00230962	0.00224689	0.00225697	0.00271537	0.00221253	0.00224363	0.0022472	0.00110909	0.00101835	0.0014141	0.00123396	0.00158611	0.000999411	0.00130717	0.00161374	0.00124437	0.00135792	0.00115704	0.00125745	0.00095017	0.00137492	0.00133507	0.00121399	0.00125014	0.000921212	0.00250812	0.00124135	0.494931	-1.0147	4.25622e-16	2.41698	down
meta_441	Indole-3-acetamide	1.39278e-05	3.17616e-05	2.88676e-05	2.14487e-05	1.34077e-05	1.02814e-05	1.65249e-05	2.46496e-05	2.25991e-05	2.67214e-05	3.94973e-05	2.00206e-05	3.17025e-05	2.01959e-05	3.5597e-05	2.6587e-05	1.22925e-05	2.25108e-05	3.63213e-05	3.73823e-05	4.28395e-05	3.04155e-05	4.37489e-05	2.32138e-05	3.24643e-05	2.69546e-05	3.93561e-05	3.28691e-05	4.57869e-05	5.04402e-05	0.000103368	2.64587e-05	3.56995e-05	3.08736e-05	3.57735e-05	2.89089e-05	9.24756e-05	5.90073e-05	2.46148e-05	4.33697e-05	1.76193	0.817159	0.00264479	1.39778	up
meta_447	Spermidine	6.28124e-05	5.23517e-05	5.56368e-05	4.77886e-05	5.45126e-05	5.88211e-05	8.05195e-05	5.2825e-05	4.7679e-05	5.28815e-05	5.75537e-05	4.65085e-05	6.5847e-05	5.82446e-05	6.19909e-05	6.31723e-05	7.66833e-05	6.12126e-05	4.54914e-05	7.67884e-05	3.82584e-05	4.17576e-05	3.93604e-05	4.99681e-05	4.40035e-05	4.34975e-05	4.1616e-05	3.1305e-05	5.37618e-05	3.64743e-05	4.78753e-05	4.51266e-05	3.67205e-05	5.76963e-05	7.1812e-05	6.66096e-05	5.47984e-05	3.71508e-05	5.8966e-05	4.6544e-05	0.789336	-0.341289	0.000868204	1.36949	down
meta_448	N-Acetyl-L-Histidine	1.43151e-05	1.51713e-05	1.28366e-05	1.25136e-05	1.22708e-05	1.45081e-05	1.42438e-05	1.46998e-05	1.17239e-05	9.1512e-06	1.56014e-05	1.11869e-05	1.53083e-05	1.55766e-05	1.47684e-05	1.63304e-05	1.17778e-05	1.34719e-05	1.02372e-05	9.32982e-06	7.37264e-06	1.21831e-05	9.3252e-06	8.54459e-06	7.10046e-06	9.29679e-06	1.10908e-05	8.23703e-06	7.52809e-06	7.30931e-06	9.88692e-06	8.75202e-06	8.88924e-06	7.43058e-06	8.42015e-06	6.30009e-06	9.31823e-06	1.01751e-05	1.32511e-05	8.73113e-06	0.658896	-0.601878	8.59834e-09	1.94336	down
meta_451	Phe-Pro	8.70039e-05	0.000142154	0.00010232	5.42993e-05	0.00013278	7.6105e-05	9.9605e-05	8.90871e-05	0.000113183	0.000159386	0.000120042	0.000134261	8.99647e-05	7.64764e-05	5.82944e-05	8.133e-05	5.92956e-05	0.000138094	7.45771e-05	8.0192e-05	0.000134192	8.36972e-05	8.27933e-05	7.51045e-05	0.000106879	5.12022e-05	6.5226e-05	5.39705e-05	5.91514e-05	7.01954e-05	7.03155e-05	5.38392e-05	3.90083e-05	0.000127381	0.000106204	7.68828e-05	6.79167e-05	8.77589e-05	9.84225e-05	7.84288e-05	0.796858	-0.327605	0.0366213	1.0461	down
meta_452	LPE(16:1/0:0)	4.70969e-06	4.73815e-06	2.0577e-06	3.23763e-06	6.5165e-06	4.56621e-06	1.52599e-06	2.59111e-06	3.43124e-06	4.20502e-06	4.4872e-06	1.07692e-05	2.75214e-06	2.83641e-06	5.0651e-06	2.54231e-06	3.31992e-06	1.74264e-06	5.52337e-06	2.45749e-06	6.99918e-06	3.15814e-06	1.32314e-05	7.6283e-06	7.04293e-06	1.17834e-05	4.73199e-06	4.1794e-06	1.31326e-05	8.14749e-06	9.96488e-06	2.32624e-05	3.74928e-06	4.34743e-06	5.21189e-06	1.29542e-05	3.08216e-06	7.60974e-06	3.95375e-06	8.34539e-06	2.11075	1.07776	0.00251772	1.27874	up
meta_456	Barbituric acid	0.00236176	0.00256451	0.00257729	0.00204322	0.00235844	0.00292434	0.002815	0.00211121	0.00255571	0.00219081	0.00209099	0.00227036	0.00239614	0.00178832	0.00242439	0.00229819	0.00265332	0.0022954	0.00214457	0.00283401	0.00199892	0.0023806	0.00119911	0.00141373	0.00216767	0.00170678	0.00230031	0.00208852	0.00127362	0.00191485	0.00175236	0.00136065	0.00155206	0.00151985	0.00109333	0.00164293	0.00183565	0.00163843	0.0023849	0.0017133	0.718395	-0.477151	8.03622e-07	1.82677	down
meta_458	2-Pentyl-3-phenyl-2-propenal	4.2012e-05	3.80007e-05	4.82623e-05	4.23281e-05	2.69092e-05	2.56012e-05	2.9265e-05	3.26584e-05	2.62827e-05	2.69844e-05	2.4585e-05	2.44988e-05	2.85721e-05	2.85407e-05	2.79917e-05	3.65795e-05	3.00831e-05	3.18417e-05	2.4076e-05	3.47363e-05	2.1111e-05	2.49927e-05	2.61826e-05	2.33989e-05	2.42728e-05	2.12885e-05	2.77415e-05	2.61374e-05	2.07832e-05	1.67697e-05	2.32651e-05	2.21982e-05	2.40859e-05	2.17965e-05	2.23244e-05	1.83468e-05	2.38892e-05	2.07265e-05	3.14904e-05	2.27395e-05	0.722108	-0.469713	1.65237e-05	1.75545	down
meta_460	6-Methylnicotinamide	0.00402142	0.00466773	0.00191122	0.00200798	0.00297864	0.00227295	0.0023205	0.00101005	0.00199149	0.00216868	0.00167377	0.00235802	0.00102376	0.0026566	0.0017365	0.003834	0.00170216	0.00404988	1.15604e-05	0.00188967	0.00247414	0.00267345	0.000701087	0.00326815	0.00158277	0.000994491	0.00288156	0.00221945	0.000587916	0.000253542	0.000706216	0.000165669	5.41249e-06	4.36178e-05	7.95987e-05	9.33166e-06	0.00167981	0.000102137	0.00231433	0.00113491	0.490383	-1.02802	0.00290594	1.27394	down
meta_463	N-Methylalanine	0.000353465	0.000384102	0.000323697	0.000341097	0.000375818	0.000286154	0.000419207	0.000300633	0.000413718	0.000409319	0.000437993	0.000422586	0.000262017	0.000334842	0.000332025	0.000411889	0.000413416	0.0004142	0.000390852	0.000291538	0.000422246	0.000458728	0.000384577	0.000439076	0.000427461	0.000281349	0.000334052	0.000419866	0.000394258	0.000388431	0.000435806	0.000375872	0.000427679	0.000466972	0.00044616	0.00044218	0.000462652	0.000477112	0.000365928	0.000415804	1.1363	0.184343	0.00519995	1.13289	up
meta_470	L-Tryptophanamide	8.89413e-06	1.77549e-05	1.23947e-05	7.19993e-06	1.07049e-05	1.02717e-05	1.2272e-05	9.00899e-06	2.20916e-05	1.03947e-05	1.25514e-05	1.23016e-05	1.40397e-05	1.62283e-05	1.16451e-05	1.26037e-05	1.96716e-05	1.40694e-05	1.92741e-05	1.70512e-05	3.69809e-05	3.21287e-05	4.14969e-05	3.98834e-05	5.39488e-05	3.42625e-05	3.80915e-05	5.4357e-05	3.75233e-05	4.59212e-05	3.55894e-05	4.32112e-05	2.94354e-05	4.14878e-05	4.70783e-05	4.06048e-05	4.1776e-05	3.15972e-05	1.35212e-05	4.02986e-05	2.98041	1.57551	4.89203e-14	2.32952	up
meta_473	1-Hydroxylamino-2-phenylethane	0.0012125	0.00126171	0.00152086	0.00137331	0.00121215	0.00122456	0.00133608	0.00115189	0.00150516	0.00125208	0.00138328	0.0011574	0.00127633	0.00137768	0.00133594	0.00133908	0.00133726	0.00113181	0.00122249	0.0012816	0.00131053	0.00111109	0.000946329	0.00113442	0.00121179	0.000939213	0.00113266	0.00125963	0.00119164	0.00104689	0.0013489	0.000979172	0.00108888	0.00113176	0.00114441	0.00103437	0.00140879	0.00113795	0.00129466	0.00114213	0.88219	-0.180838	0.000451886	1.43637	down
meta_475	γ-L-Glutamate-Cysteine	1.46579e-05	1.44019e-05	7.40188e-06	1.16566e-05	1.31154e-05	1.87571e-05	2.20987e-05	1.7326e-05	1.95467e-05	1.53667e-05	1.49042e-05	6.58709e-06	8.53189e-06	1.72788e-05	1.81544e-05	1.83086e-05	2.57714e-05	2.25912e-05	9.62358e-06	1.76603e-05	1.30397e-05	1.36272e-05	7.61267e-06	1.60205e-05	1.06444e-05	7.34176e-06	1.09387e-05	4.52548e-06	6.3173e-06	4.06942e-06	1.54483e-05	1.46587e-05	1.29319e-05	1.15685e-05	7.63859e-06	7.77017e-06	1.02278e-05	1.4317e-05	1.5687e-05	1.04832e-05	0.668274	-0.581488	0.00101929	1.25315	down
meta_480	DL-O-tyrosine	0.047135	0.0479997	0.0577381	0.0492252	0.0494483	0.0553525	0.0561704	0.052384	0.0484034	0.0488034	0.0483242	0.0427945	0.0573854	0.0536466	0.0535654	0.0532437	0.0558427	0.0510059	0.045044	0.0616288	0.0459219	0.0464694	0.0444565	0.0413445	0.0473003	0.0463274	0.0503295	0.0478608	0.0422517	0.0427554	0.0514372	0.0389866	0.0479006	0.0455164	0.0414083	0.0402638	0.0527716	0.0428859	0.0517571	0.0453438	0.876089	-0.190851	5.60012e-05	1.49011	down
meta_484	Kojibiose	1.38288e-05	1.29412e-05	3.89664e-05	1.43972e-05	1.55666e-05	1.69776e-05	1.3173e-05	3.10881e-05	7.7506e-06	1.56742e-05	9.92641e-06	1.30001e-05	2.93043e-05	1.13319e-05	1.08377e-05	1.54451e-05	1.20848e-05	1.247e-05	2.87152e-05	2.42134e-05	4.94378e-05	5.44607e-05	7.34104e-05	4.22158e-05	1.59452e-05	0.000134519	3.40569e-05	5.46923e-05	9.24871e-05	0.000152016	7.96175e-06	1.18073e-05	4.87169e-05	3.55445e-05	1.90145e-05	2.68815e-05	8.31755e-05	5.22499e-05	1.73846e-05	5.49219e-05	3.15922	1.65957	0.000978334	1.57766	up
meta_486	Allopurinol	0.00333671	0.00372338	0.00164533	0.00165764	0.00242772	0.00198846	0.00190359	0.000873919	0.00158704	0.00199763	0.00127194	0.00191612	0.000822265	0.00219681	0.00149236	0.00358016	0.00154026	0.00373435	2.47452e-05	0.00174094	0.0020608	0.0022033	0.000679983	0.00277687	0.00127798	0.000913311	0.00249595	0.00205777	0.000510271	0.000238639	0.000609216	0.000125422	4.94653e-06	5.02802e-05	7.00902e-05	1.2167e-05	0.00139769	0.000104268	0.00197307	0.000977164	0.495251	-1.01377	0.00330252	1.24883	down
meta_487	PC(12:0/12:0)	0.000413734	0.000260598	0.000158896	0.000265405	0.000256723	0.000270617	0.00026278	0.000362386	0.000163876	0.000298012	0.000342874	0.000501792	0.000209903	0.000227354	0.000213456	0.000235813	0.000126225	0.000139965	0.00036751	0.000269287	0.000256419	0.000146332	0.000216058	0.000560742	0.000268716	0.000536124	0.000362051	0.000322679	0.000456628	0.000433979	0.000361042	0.000477136	0.000265014	0.000462528	0.000381765	0.000526597	0.000231442	0.000414843	0.00026736	0.000371117	1.38808	0.473087	0.00648778	1.08347	up
meta_488	2-Aminomethylpyrimidine	0.000174625	0.00014934	0.000152903	0.000129405	0.000155358	0.000117026	0.000139702	0.00012251	0.000128785	0.000146234	0.000158176	0.000124111	0.000134415	0.000152093	0.00015653	0.00016628	0.000139858	0.000146816	0.000123408	0.000133515	0.000122268	0.000140626	0.000110015	0.000130563	0.000119004	9.53375e-05	0.000118793	0.000105843	0.000115864	7.57029e-05	8.71337e-05	9.225e-05	8.45812e-05	0.000110291	8.02811e-05	0.00012884	0.000121554	0.000117823	0.000142554	0.000108709	0.762582	-0.391035	9.98185e-07	1.79171	down
meta_494	Creatine phosphate	1.04979e-05	1.20065e-05	8.33608e-06	1.14491e-05	9.23463e-06	1.58614e-05	1.10856e-05	8.67229e-06	8.77971e-06	1.35037e-05	1.28747e-05	1.1563e-05	1.71278e-05	1.38169e-05	8.17372e-06	1.26689e-05	1.52099e-05	1.24905e-05	7.86757e-06	1.09313e-05	9.29823e-06	2.1829e-05	1.41781e-05	1.61118e-05	1.05922e-05	1.20889e-05	1.75581e-05	1.37004e-05	1.51428e-05	1.32999e-05	1.32968e-05	9.10996e-06	1.1935e-05	1.60228e-05	1.33507e-05	9.13333e-06	1.56778e-05	1.37213e-05	1.16076e-05	1.36693e-05	1.17762	0.235873	0.0397068	1.01473	up
meta_498	N-Acetylcadaverine	3.31894e-05	4.11502e-05	3.97189e-05	3.27124e-05	2.66908e-05	3.80885e-05	3.02709e-05	2.94266e-05	2.9902e-05	3.00116e-05	3.02029e-05	3.16748e-05	3.42278e-05	3.27245e-05	3.59426e-05	3.37262e-05	4.17651e-05	3.11694e-05	2.2682e-05	2.83929e-05	2.34524e-05	2.57843e-05	1.94185e-05	2.26696e-05	2.58319e-05	2.02197e-05	2.92039e-05	2.99542e-05	2.90621e-05	2.45151e-05	3.61714e-05	2.74248e-05	2.73124e-05	1.90526e-05	2.65943e-05	1.66524e-05	2.321e-05	3.79755e-05	3.26835e-05	2.58058e-05	0.789568	-0.340865	0.000280237	1.42346	down
meta_500	Hypotaurocyamine	3.50925e-05	3.66444e-05	5.24738e-05	1.99389e-05	3.01442e-05	2.58185e-05	2.54628e-05	1.00003e-05	1.30348e-05	2.07533e-05	1.4357e-05	1.88822e-05	1.5038e-05	2.05156e-05	2.08652e-05	3.86868e-05	1.89436e-05	4.02681e-05	1.1678e-06	2.14998e-05	2.31179e-05	2.55061e-05	1.23701e-05	2.86486e-05	1.0851e-05	5.75415e-06	2.99775e-05	2.64574e-05	9.22376e-06	1.52684e-06	4.97873e-06	2.70681e-06	1.19645e-09	1.1139e-09	1.13527e-09	1.0194e-09	1.29646e-05	5.21423e-06	2.39794e-05	1.10723e-05	0.461745	-1.11483	0.0013458	1.34061	down
meta_506	Guanine	6.09841e-06	3.80711e-06	4.95873e-06	1.83912e-06	2.52488e-06	6.07008e-06	4.07081e-06	3.44639e-06	2.19632e-06	2.53885e-06	1.9267e-06	1.68881e-06	2.79408e-06	2.88376e-06	1.57159e-06	9.08784e-06	2.23627e-06	5.13565e-06	6.66825e-07	6.39281e-06	1.95634e-06	3.03258e-06	2.38578e-06	1.16004e-06	9.09808e-07	1.15887e-06	4.25488e-06	6.10112e-06	3.81249e-07	1.91509e-07	1.55334e-06	3.60321e-07	2.89887e-07	1.86615e-07	2.84826e-07	3.23262e-07	9.30672e-07	3.88189e-07	3.59675e-06	1.43607e-06	0.399269	-1.32457	0.00106913	1.35943	down
meta_508	Leu-Gly	4.74003e-05	2.99657e-05	3.65826e-05	8.93632e-06	1.6297e-05	2.72607e-05	5.23812e-05	1.49971e-05	2.14375e-05	2.86545e-05	2.93909e-05	2.41654e-05	2.53541e-05	2.34221e-05	2.32744e-05	2.31067e-05	2.03951e-05	3.72433e-05	1.16627e-05	3.90132e-05	2.29069e-05	2.00248e-05	2.0945e-05	4.38077e-05	1.38656e-05	3.64875e-05	7.03944e-06	1.95414e-05	1.37964e-05	1.11179e-05	9.06914e-06	1.13383e-05	1.10415e-05	1.18604e-05	8.15513e-06	7.90269e-06	2.68761e-05	1.34698e-05	2.7047e-05	1.71803e-05	0.635201	-0.654714	0.00707192	1.10251	down
meta_509	LPC(0:0/22:4)	0.000554041	0.000601623	0.000229385	0.000412792	0.000473122	0.000423389	0.000393995	0.000585489	0.00050253	0.000537988	0.000558553	0.000567836	0.000508792	0.000469477	0.00040925	0.000335578	0.000231979	0.000289323	0.000558096	0.000465616	0.000482324	0.000863618	0.000512769	0.00107964	0.000633924	0.00068852	0.000439933	0.000665709	0.000619722	0.000794026	0.000750536	0.00123172	0.000359507	0.000939847	0.000562929	0.00155209	0.000587412	0.00110046	0.000455443	0.00077026	1.69123	0.758076	0.000540634	1.47233	up
meta_510	LPC(22:4/0:0)	0.000554041	0.000601623	0.000229385	0.000412792	0.000473122	0.000423389	0.000393995	0.000585489	0.00050253	0.000537988	0.000558553	0.000567836	0.000508792	0.000469477	0.00040925	0.000335578	0.000231979	0.000289323	0.000558096	0.000465616	0.000482324	0.000863618	0.000512769	0.00107964	0.000633924	0.00068852	0.000439933	0.000665709	0.000619722	0.000794026	0.000750536	0.00123172	0.000359507	0.000939847	0.000562929	0.00155209	0.000587412	0.00110046	0.000455443	0.00077026	1.69123	0.758076	0.000540634	1.47233	up
meta_511	LPC(0:0/22:5)	0.000402752	0.000591907	0.000162941	0.00067577	0.000350986	0.000352365	0.000507188	0.000803991	0.000612213	0.000638949	0.000623001	0.000596246	0.000343462	0.000358091	0.000468022	0.000356027	0.000183128	0.000209369	0.000625889	0.000707189	0.000587776	0.00108758	0.000356933	0.000718182	0.000381118	0.000855649	0.000401327	0.000800719	0.000723625	0.000821311	0.000562165	0.00109878	0.000230942	0.00125994	0.000619011	0.00103602	0.000432701	0.000933551	0.000478474	0.000717074	1.49867	0.58368	0.00633155	1.13707	up
meta_518	LPC(0:0/20:4)	0.0271955	0.0176062	0.0130035	0.0174303	0.0196338	0.0186484	0.0140093	0.0247687	0.0184674	0.0225745	0.0215679	0.0251236	0.024014	0.0177538	0.0225216	0.0177121	0.0145962	0.014147	0.0214129	0.0213479	0.0160732	0.0177216	0.0231942	0.0232989	0.0217515	0.0221798	0.0195531	0.0229398	0.0246034	0.0286239	0.0244853	0.0263713	0.0224787	0.025085	0.0237612	0.026357	0.0187044	0.0260949	0.0196767	0.0229598	1.16685	0.222623	0.00895171	1.11287	up
meta_519	LPC(20:4/0:0)	0.0271955	0.0176062	0.0130035	0.0174303	0.0196338	0.0186484	0.0140093	0.0247687	0.0184674	0.0225745	0.0215679	0.0251236	0.024014	0.0177538	0.0225216	0.0177121	0.0145962	0.014147	0.0214129	0.0213479	0.0160732	0.0177216	0.0231942	0.0232989	0.0217515	0.0221798	0.0195531	0.0229398	0.0246034	0.0286239	0.0244853	0.0263713	0.0224787	0.025085	0.0237612	0.026357	0.0187044	0.0260949	0.0196767	0.0229598	1.16685	0.222623	0.00895171	1.11287	up
meta_520	LPC(20:5/0:0)	4.47824e-05	3.91418e-05	2.00505e-05	3.63852e-05	3.35038e-05	1.98803e-05	2.08002e-05	2.98751e-05	3.23561e-05	2.38682e-05	1.23179e-05	5.27585e-05	2.19212e-05	1.73976e-05	2.57656e-05	3.0809e-05	2.21597e-05	1.85253e-05	3.56747e-05	1.84097e-05	3.25156e-05	4.00991e-05	3.78009e-05	4.17863e-05	3.20385e-05	7.34721e-05	4.13958e-05	4.16278e-05	4.71346e-05	4.76809e-05	2.0988e-05	6.04007e-05	2.9135e-05	3.37017e-05	3.30249e-05	4.8786e-05	2.26348e-05	4.38219e-05	2.78191e-05	4.04469e-05	1.45392	0.539952	0.00207662	1.26608	up
meta_521	LPC(0:0/20:5)	4.72797e-05	4.01695e-05	2.2128e-05	4.15123e-05	3.52527e-05	2.13169e-05	1.61304e-05	2.54157e-05	2.60501e-05	2.86167e-05	1.44772e-05	4.92594e-05	2.47023e-05	2.25421e-05	2.26227e-05	3.36652e-05	2.15245e-05	2.06319e-05	4.12832e-05	2.56165e-05	2.83242e-05	3.88604e-05	2.88316e-05	3.9723e-05	2.22066e-05	6.8175e-05	3.8035e-05	4.28553e-05	4.45925e-05	5.21146e-05	3.15321e-05	5.98667e-05	3.32335e-05	3.42326e-05	3.2948e-05	4.5371e-05	2.58709e-05	4.01304e-05	2.90098e-05	3.92724e-05	1.35376	0.436974	0.00734732	1.14923	up
meta_522	LPC(18:0/0:0)	0.0550016	0.0522526	0.0572979	0.0549079	0.0523966	0.054177	0.056019	0.0554584	0.0500677	0.052149	0.0516249	0.0478641	0.055959	0.0566155	0.0570554	0.0548039	0.0517766	0.0526223	0.0546754	0.0530883	0.0517715	0.0475561	0.054624	0.0462746	0.0522937	0.0493284	0.0536263	0.0501842	0.0473474	0.0447992	0.0509087	0.0506405	0.0540597	0.0498111	0.049924	0.046848	0.0480305	0.0505543	0.0537907	0.0499212	0.928065	-0.107702	6.45174e-05	1.60026	down
meta_524	LPC(18:2/0:0)	0.0517107	0.0523021	0.0524128	0.0534116	0.0535008	0.0559875	0.0536651	0.0551334	0.0490672	0.0546824	0.054288	0.0515892	0.0572246	0.0544185	0.0529283	0.0534992	0.0596941	0.0565745	0.0509095	0.0590521	0.0538517	0.0522185	0.0509774	0.0473815	0.0520388	0.0515129	0.0534582	0.0495649	0.0461213	0.0482814	0.0493495	0.0465237	0.0476972	0.0476922	0.0495771	0.0450958	0.0507982	0.0454787	0.0541026	0.0493122	0.911457	-0.133754	3.30289e-06	1.71542	down
meta_527	LPC(0:0/16:0)	0.0632453	0.0648156	0.0696988	0.0665335	0.066083	0.06748	0.0703225	0.0695733	0.0615786	0.0655785	0.0657752	0.0610667	0.0707632	0.0721008	0.0691759	0.0682956	0.06941	0.0696875	0.0650466	0.0742199	0.0627772	0.061438	0.0672453	0.0595949	0.0642853	0.0617825	0.0689126	0.0648184	0.0606954	0.0610982	0.0635172	0.044236	0.064998	0.0625356	0.0609563	0.0567135	0.0642177	0.0624712	0.0675225	0.0617941	0.915162	-0.1279	0.000438335	1.38589	down
meta_531	Carnitine C20:1-OH	1.35787e-06	8.30517e-07	3.5564e-07	5.59853e-07	8.00602e-07	5.11882e-07	1.15631e-06	7.28535e-07	2.69877e-06	1.70448e-06	1.0318e-06	1.72536e-06	1.39685e-06	4.74242e-07	5.52701e-07	1.26372e-06	7.75363e-07	5.14248e-07	6.04968e-07	1.29088e-06	1.62198e-06	4.02005e-06	6.69912e-07	1.5301e-06	7.45257e-07	2.903e-06	1.50036e-06	1.41812e-06	2.65629e-06	2.31769e-06	1.59658e-06	1.70578e-06	8.63958e-07	2.03584e-06	1.19073e-07	1.89256e-06	2.82168e-06	2.21594e-06	1.01673e-06	1.81301e-06	1.78318	0.834451	0.00422659	1.3557	up
meta_539	Carnitine C16:1	9.54037e-06	9.82556e-06	7.16841e-06	4.92387e-06	7.26575e-06	6.1158e-06	9.11358e-06	1.0921e-05	1.9021e-05	6.23408e-06	1.15036e-05	8.55569e-06	6.95341e-06	4.54282e-06	7.90689e-06	5.3936e-06	3.66344e-06	5.3237e-06	3.96851e-06	1.04854e-05	7.63894e-06	2.89194e-05	8.68328e-06	1.52912e-05	3.90461e-06	1.5194e-05	1.12836e-05	1.11966e-05	1.94938e-05	7.74848e-06	7.83657e-06	7.24233e-06	5.43801e-06	1.33482e-05	9.29292e-06	1.43304e-05	1.62557e-05	1.483e-05	7.92132e-06	1.21071e-05	1.52842	0.612042	0.0148182	1.1315	up
meta_545	Carnitine C14:3	6.2561e-05	3.20746e-05	8.6216e-05	3.46369e-05	4.16101e-05	4.92902e-05	7.75514e-05	6.30436e-05	6.05406e-05	3.56545e-05	6.55347e-05	5.52773e-05	2.43296e-05	1.80355e-05	7.82033e-05	4.64268e-05	3.64814e-05	9.26005e-05	3.6199e-05	2.67538e-05	3.26764e-05	4.756e-05	2.80869e-05	2.1301e-05	5.76288e-05	1.84536e-05	6.08507e-05	1.57675e-05	3.26505e-05	2.85102e-05	3.21978e-05	2.55082e-05	4.41106e-05	1.79734e-05	5.67861e-05	4.06693e-05	3.95493e-05	4.21826e-05	5.1151e-05	3.56924e-05	0.697784	-0.519148	0.0122325	1.09347	down
meta_556	Carnitine C7-OH	1.93568e-06	1.14555e-06	1.70079e-06	1.63867e-06	1.34747e-06	1.15688e-06	2.16824e-06	2.07798e-06	3.89298e-06	2.55518e-06	1.15013e-06	1.55621e-06	1.68165e-06	2.13347e-06	7.38243e-07	2.13884e-06	9.02536e-07	1.68421e-06	1.73257e-06	2.77838e-06	2.36119e-06	4.40687e-06	1.81201e-06	2.1728e-06	1.87429e-06	1.68308e-06	2.3924e-06	1.82446e-06	2.38789e-06	2.04027e-06	3.96468e-06	2.18235e-06	1.9324e-06	1.89549e-06	3.18052e-06	2.19532e-06	3.30387e-06	2.44394e-06	1.80578e-06	2.44743e-06	1.35533	0.438646	0.0122314	1.06184	up
meta_558	Carnitine C8:1	0.007382	0.0035588	0.00997248	0.00714924	0.00685354	0.00532626	0.00763563	0.00698614	0.00595098	0.0043379	0.00920815	0.00942775	0.00286072	0.00246827	0.0113002	0.00450335	0.00387814	0.0108486	0.00480045	0.00195998	0.00881027	0.00348816	0.00521261	0.00247687	0.00871793	0.00192004	0.00556035	0.00343834	0.00303148	0.00408141	0.0057018	0.00155733	0.00452073	0.00381189	0.00440068	0.00171938	0.00405791	0.0037565	0.00632043	0.00423687	0.670345	-0.577024	0.0127897	1.14161	down
meta_578	16-Dehydroprogesterone	1.60684e-05	1.19753e-05	9.83031e-06	1.60479e-05	1.55706e-05	1.2168e-05	1.02214e-05	1.25098e-05	1.52708e-05	1.01908e-05	1.02927e-05	1.49435e-05	1.08156e-05	1.04171e-05	8.52272e-06	1.19451e-05	1.24712e-05	5.65517e-06	2.01664e-05	9.88906e-06	1.25754e-05	7.79326e-06	1.96191e-05	1.34524e-05	1.51724e-05	2.09868e-05	1.51286e-05	1.21076e-05	2.08858e-05	1.78621e-05	1.76334e-05	3.10904e-05	1.29919e-05	1.07457e-05	1.23825e-05	3.35358e-05	1.30572e-05	1.73516e-05	1.22486e-05	1.69095e-05	1.38053	0.465223	0.012628	1.04059	up
meta_581	Phe-Met	2.41712e-05	2.3368e-05	2.83515e-05	2.14162e-05	3.52232e-05	2.4691e-05	2.13752e-05	1.95447e-05	3.4081e-05	2.56313e-05	2.62306e-05	2.67694e-05	2.01661e-05	1.99066e-05	2.40272e-05	2.7706e-05	1.92363e-05	1.32938e-05	8.77526e-06	1.77148e-05	2.73903e-05	1.40262e-05	1.6393e-05	2.97925e-05	1.69556e-05	2.18565e-05	1.20334e-05	2.29287e-05	1.74456e-05	1.58195e-05	1.00885e-05	1.06923e-05	6.34067e-06	1.16459e-05	7.99973e-06	1.1808e-05	1.65447e-05	1.24126e-05	2.3084e-05	1.56763e-05	0.6791	-0.558304	0.000922679	1.3795	down
meta_585	Carnitine C10:2	0.000460228	0.000287216	0.000610662	0.000320551	0.000389031	0.000456692	0.00057725	0.000515341	0.000311727	0.000251066	0.000667764	0.000426192	0.000221507	0.000174691	0.000451722	0.000295507	0.000257861	0.000637442	0.000279603	0.000180301	0.00024102	0.000295862	0.000202951	0.000136314	0.000413593	0.000131717	0.000374355	0.000115688	0.000278448	0.000265689	0.000237592	0.000214236	0.000292559	0.000167815	0.000417425	0.000433209	0.000285058	0.000304848	0.000388618	0.000267132	0.687391	-0.540797	0.00614183	1.24746	down
meta_588	Carnitine C12:3	0.000161522	8.53901e-05	0.000212863	0.000112365	0.000127184	0.000111991	0.00013775	0.000162013	0.000147112	9.86604e-05	0.000243864	0.000162202	6.61875e-05	6.42752e-05	0.000206602	7.53287e-05	6.91982e-05	0.000266663	0.000105551	4.66689e-05	6.92585e-05	9.31598e-05	6.91799e-05	3.91393e-05	0.000144169	2.54661e-05	0.00010626	3.5579e-05	5.25863e-05	8.23004e-05	9.00106e-05	4.50308e-05	7.85591e-05	5.35774e-05	8.78962e-05	5.05269e-05	8.105e-05	6.95865e-05	0.000133169	7.07409e-05	0.531209	-0.912647	0.00040432	1.46003	down
meta_593	Aniline	5.82557e-05	7.53337e-05	7.30373e-05	7.77023e-05	5.6437e-05	6.31534e-05	7.81337e-05	4.59646e-05	7.22259e-05	7.2878e-05	5.91007e-05	7.08529e-05	4.68983e-05	6.4808e-05	5.3438e-05	5.50928e-05	5.55412e-05	6.92929e-05	7.63794e-05	5.92683e-05	5.36163e-05	2.49719e-05	4.30248e-05	3.32121e-05	5.6278e-05	2.43681e-05	3.68686e-05	4.55984e-05	4.21795e-05	4.28814e-05	8.95933e-05	3.1343e-05	3.13989e-05	4.25893e-05	4.86702e-05	3.69508e-05	8.18156e-05	4.55288e-05	6.41897e-05	4.50494e-05	0.701816	-0.510834	0.000333712	1.54547	down
meta_594	Benzamide	1.01478e-05	1.42415e-05	1.58316e-05	9.82714e-06	5.89858e-06	1.19258e-05	6.86208e-06	2.42835e-05	1.03757e-05	1.01601e-05	1.38382e-05	6.75946e-06	7.98707e-06	1.49524e-05	8.24314e-06	8.56434e-06	4.70767e-06	8.94588e-06	1.03101e-05	6.43127e-06	8.47566e-06	4.04201e-06	2.85472e-06	5.44625e-06	2.32597e-06	3.8544e-06	4.78093e-06	8.08228e-06	5.18643e-06	7.42881e-06	1.64805e-05	1.15111e-05	2.11812e-06	1.33581e-05	5.25301e-06	7.49709e-06	1.08127e-05	9.88174e-06	1.05147e-05	7.18833e-06	0.683648	-0.548675	0.020848	1.06637	down
meta_601	N,N-Dimethylarginine	4.94584e-05	8.30843e-05	0.000113745	8.0974e-05	7.79777e-05	6.52052e-05	5.41047e-05	5.15356e-05	6.22715e-05	5.58372e-05	4.86079e-05	7.6572e-05	8.72874e-05	5.24088e-05	5.93489e-05	5.67966e-05	8.33699e-05	5.95097e-05	6.18554e-05	5.95192e-05	0.000111877	6.81047e-05	6.91098e-05	8.47573e-05	7.25315e-05	7.1427e-05	9.24632e-05	9.60583e-05	8.94877e-05	0.000136026	9.68487e-05	5.07076e-05	6.85674e-05	5.80429e-05	4.66999e-05	6.99249e-05	0.000128915	0.000108313	6.69735e-05	8.44367e-05	1.26075	0.334281	0.0189563	1.09362	up
meta_603	Phe-Glu	0.000335969	0.000299175	0.000475827	0.00044193	0.000612533	0.000341429	0.00032696	0.000310263	0.000442026	0.000426398	0.000388893	0.000393077	0.000439754	0.000342013	0.000274483	0.000331355	0.000358726	0.000294771	0.000148164	0.000337608	0.000401405	0.000317686	0.000280443	0.000542589	0.00030326	0.000370517	0.000204189	0.000531988	0.000345796	0.000237193	0.000141526	0.000181388	7.02929e-05	0.000178496	0.000124409	0.000174215	0.000252176	0.000174241	0.000366068	0.000268434	0.73329	-0.447543	0.0144455	1.05413	down
meta_605	Leu-Gly-Leu	3.22867e-06	3.8881e-06	4.55141e-06	4.1576e-06	4.98517e-06	3.37986e-06	4.86343e-06	4.93669e-06	3.81413e-06	4.12611e-06	3.33862e-06	2.43692e-06	3.299e-06	2.18082e-06	2.58344e-06	2.20676e-06	3.37418e-06	3.87989e-06	2.19158e-06	4.87273e-06	2.61102e-06	1.9735e-06	1.77587e-06	1.63327e-06	1.66259e-06	1.74697e-06	3.75798e-06	2.11873e-06	3.07581e-06	1.91806e-06	9.95458e-07	1.65143e-06	1.04175e-06	1.37195e-06	2.10693e-06	1.84329e-06	3.36276e-06	1.46949e-06	3.61475e-06	2.00649e-06	0.555084	-0.849222	1.38981e-06	1.81396	down
meta_615	LPC(0:0/18:0)	0.0730545	0.0725401	0.0783299	0.0745215	0.0677863	0.070545	0.0720955	0.0712509	0.0640376	0.0673214	0.0666062	0.060926	0.0727171	0.0734025	0.0736398	0.0707846	0.0677998	0.0705815	0.070529	0.0714386	0.0654029	0.0606087	0.069768	0.0554485	0.06617	0.0613146	0.0689602	0.0639788	0.0588486	0.0555165	0.0644039	0.0632295	0.0686179	0.062694	0.064511	0.0596482	0.061109	0.0643858	0.0704954	0.0630342	0.894161	-0.161393	1.84441e-06	1.84566	down
meta_618	Methyldopa	4.04402e-05	4.48228e-05	2.47409e-05	1.83397e-05	3.47314e-05	3.90311e-05	4.01593e-05	2.97222e-05	2.801e-05	2.98983e-05	3.2635e-05	3.28392e-05	2.22559e-05	5.65668e-05	2.98575e-05	3.17465e-05	3.7902e-05	2.99476e-05	1.83377e-05	4.41731e-05	1.42258e-05	2.13117e-05	1.60357e-05	2.54561e-05	2.25203e-05	2.06685e-05	3.3008e-05	1.30716e-05	1.56545e-05	1.18652e-05	2.14917e-05	1.64305e-05	2.84636e-05	1.78137e-05	1.47522e-05	1.86844e-05	9.59692e-06	1.96791e-05	3.33079e-05	1.89294e-05	0.568317	-0.815232	2.39847e-06	1.77211	down
meta_627	D-Glucosaminic acid	1.66893e-05	1.96681e-05	1.8095e-05	1.37141e-05	1.80806e-05	2.14143e-05	1.87215e-05	1.79862e-05	1.3363e-05	1.68236e-05	1.38855e-05	6.44658e-06	1.55904e-05	1.77371e-05	1.28976e-05	1.18941e-05	1.55452e-05	1.31447e-05	1.29939e-05	1.23416e-05	7.27255e-06	9.33106e-06	4.72979e-06	7.04645e-06	8.08752e-06	9.64443e-06	8.93137e-06	5.10625e-06	8.6967e-06	8.26476e-06	4.26637e-06	6.333e-06	1.0859e-05	7.99817e-06	3.15882e-06	5.90943e-06	9.191e-06	4.97697e-06	1.53516e-05	7.21131e-06	0.469743	-1.09006	3.78581e-10	2.13025	down
meta_628	Leu-Ala	1.7752e-05	1.17124e-05	2.5593e-05	7.18475e-06	1.30483e-05	2.05605e-05	1.72003e-05	5.04182e-06	9.67171e-06	1.27078e-05	1.32498e-05	1.21662e-05	1.2186e-05	1.37909e-05	1.15477e-05	1.18193e-05	1.18888e-05	1.37026e-05	3.22895e-06	1.24116e-05	8.31048e-06	1.02326e-05	1.00884e-05	1.45211e-05	6.4926e-06	8.20872e-06	2.37038e-06	8.48308e-06	9.74828e-06	6.95491e-06	3.64253e-06	4.08864e-06	4.25206e-06	2.87597e-06	2.38621e-06	2.88217e-06	9.56569e-06	3.17511e-06	1.28232e-05	6.57106e-06	0.512434	-0.964561	7.31431e-05	1.55179	down
meta_635	Stachydrine	0.00268006	0.000106155	0.00060058	0.00208171	0.00051622	0.00428074	0.00296988	0.000557436	0.00210451	0.00229792	0.0046461	0.000144015	0.00171176	0.000327336	0.00106819	0.00373487	0.000211142	0.000465029	0.00313367	0.00141382	0.000131272	0.000841691	0.0012785	0.000888852	0.00331517	0.00117792	0.00112245	0.000188653	0.00186413	0.000104051	0.000490722	6.44864e-05	0.000343728	9.23931e-05	0.000111052	6.56615e-05	0.000112103	0.000628403	0.00175256	0.000712292	0.40643	-1.29892	0.00997161	1.07262	down
meta_636	alpha-D-Glucopyranoside, beta-D-fructofuranosyl	2.07635e-06	8.45045e-06	1.4981e-05	5.28763e-06	5.21902e-06	5.7228e-06	1.99967e-06	8.7458e-06	4.87038e-06	4.41722e-06	2.66941e-06	5.2551e-06	8.48527e-06	5.00931e-06	3.79242e-06	2.66959e-06	3.71667e-06	2.89596e-06	6.82957e-06	3.63474e-06	2.19961e-05	1.82428e-05	1.8976e-05	1.18158e-05	6.58096e-06	4.34747e-05	7.23626e-06	1.53089e-05	2.2725e-05	4.13541e-05	3.68632e-06	3.55377e-06	1.7096e-05	7.29629e-06	7.3226e-06	2.03392e-05	2.95986e-05	8.37621e-06	5.33642e-06	1.69433e-05	3.17503	1.66677	0.000694316	1.52664	up
meta_638	Gly-His	0.000146795	0.000160777	0.000166377	0.000146614	0.00013539	0.000142244	0.000173575	0.000135369	0.000133412	0.000137438	0.00014507	0.000121254	0.000158315	0.00019899	0.000135682	0.000207831	0.000174187	0.000198138	0.000132271	0.000168515	0.000110756	9.4123e-05	0.00012103	0.000135129	0.00010724	8.43135e-05	0.000149248	0.000114318	8.48555e-05	9.68285e-05	9.13516e-05	0.000106287	9.54743e-05	8.43618e-05	8.73475e-05	7.77006e-05	0.000104711	0.000116766	0.000155912	0.000103436	0.663422	-0.592002	1.20787e-08	1.92093	down
meta_640	Ile-Lys	1.02912e-05	8.24335e-06	7.42612e-06	9.09909e-06	8.36812e-06	1.16561e-05	1.18516e-05	9.32687e-06	9.79393e-06	6.16016e-06	1.02469e-05	1.09691e-05	9.09453e-06	1.01228e-05	1.07684e-05	9.90189e-06	1.04224e-05	1.01176e-05	4.13941e-06	7.08642e-06	4.57276e-06	7.92129e-06	6.67644e-06	8.82299e-06	4.58548e-06	7.3699e-06	7.82614e-06	3.01329e-06	7.85653e-06	5.86305e-06	3.95699e-06	6.47654e-06	8.78143e-06	4.14581e-06	5.66398e-06	6.05645e-06	4.2269e-06	6.49163e-06	9.2543e-06	6.1282e-06	0.6622	-0.59466	6.80443e-06	1.63987	down
meta_645	Tyr-Leu	6.11187e-06	8.39607e-06	2.83798e-05	1.17976e-05	1.86595e-05	1.20456e-05	6.33658e-06	9.0009e-06	1.05717e-05	1.27511e-05	9.12371e-06	9.8878e-06	1.94427e-05	7.38014e-06	8.31578e-06	1.23992e-05	1.02678e-05	4.17357e-06	4.29115e-06	1.02213e-05	5.67089e-06	7.63234e-06	8.50191e-06	1.43089e-05	9.86037e-06	1.09256e-05	4.35708e-06	1.43211e-05	4.57565e-06	4.36377e-06	3.65846e-06	5.7524e-06	2.91217e-06	1.77209e-06	4.67957e-06	2.83743e-06	4.05832e-06	4.71243e-06	1.09777e-05	6.38336e-06	0.581484	-0.782188	0.00557723	1.11859	down
meta_646	3-Hydroxyphenylurea	0.00175387	0.00186339	0.00230931	0.00217496	0.00157341	0.00183746	0.00175293	0.00195477	0.00177988	0.00180971	0.00204519	0.00168449	0.00164585	0.00195702	0.00176184	0.00166106	0.00201598	0.0024153	0.00175172	0.00190667	0.00159445	0.00169976	0.00165207	0.00150616	0.00152271	0.00136839	0.00168945	0.00167082	0.00166007	0.00152029	0.00176472	0.00161384	0.00142404	0.00144485	0.00172006	0.00144754	0.00164201	0.00157798	0.00188274	0.0015844	0.84154	-0.248895	1.10583e-05	1.72873	down
meta_648	Carnitine C9:1-OH	0.00193847	0.00116707	0.00164488	0.00204417	0.00198898	0.00140727	0.00111349	0.00142115	0.00146458	0.000981815	0.00228637	0.00252285	0.000990445	0.000757213	0.00197712	0.000811631	0.000659219	0.00173521	0.00106665	0.000504274	0.00244751	0.000806947	0.00113121	0.000625813	0.00182503	0.000368933	0.00129243	0.000569561	0.00101131	0.000966395	0.00173205	0.00046635	0.00103736	0.00100908	0.000868038	0.000242061	0.000651147	0.00119789	0.00142414	0.00101384	0.711895	-0.490263	0.0315148	1.04315	down
meta_654	N-Acetyl-L-phenylalanine	1.10418e-05	8.97799e-06	1.19816e-05	7.77918e-06	7.64125e-06	9.7165e-06	1.43949e-05	1.18476e-05	1.20178e-05	1.12921e-05	9.91019e-06	9.54493e-06	9.99169e-06	1.34107e-05	1.24603e-05	1.05837e-05	7.82612e-06	8.85088e-06	1.03349e-05	9.77863e-06	1.24011e-05	8.0631e-06	1.25503e-05	1.09182e-05	1.08394e-05	1.47908e-05	1.35083e-05	1.24351e-05	1.26394e-05	1.15201e-05	1.46838e-05	9.37536e-06	1.45861e-05	1.41837e-05	1.50436e-05	8.81505e-06	1.86373e-05	2.21881e-05	1.04691e-05	1.31766e-05	1.25861	0.331835	0.00598387	1.26239	up
meta_662	Cyclopentylglycine	0.000207445	3.39395e-05	0.000120648	0.000183437	0.000142185	0.000500621	0.000238965	0.000107523	0.000212437	0.000196026	0.00035906	6.89811e-05	0.000169159	6.20493e-05	0.000148006	0.000319454	6.97718e-05	7.22692e-05	0.000262122	0.000144624	5.56528e-05	7.46688e-05	0.00010999	9.21197e-05	0.000282692	0.000123849	8.44399e-05	5.29217e-05	0.000141675	4.88054e-05	0.000109824	3.59411e-05	4.9924e-05	2.77052e-05	3.33441e-05	6.40214e-05	4.55942e-05	9.45664e-05	0.000180936	8.48741e-05	0.469083	-1.09208	0.00266552	1.24191	down
meta_664	Leu-Leu	0.000122359	0.000129433	0.000136934	5.80846e-05	0.000145361	0.000130703	0.00017918	0.000183361	9.557e-05	0.000157984	0.000118273	0.000122646	3.40758e-05	0.000158111	0.000213105	9.44603e-05	4.86679e-05	0.00024971	4.32619e-05	0.00015122	0.000130898	6.27443e-05	0.000231653	0.000176766	7.16666e-05	5.87548e-05	4.91587e-05	0.000132009	6.83827e-05	3.41166e-05	3.83895e-05	7.19289e-05	6.21065e-05	5.18966e-05	1.94446e-05	2.8918e-05	5.47861e-05	3.99101e-05	0.000128625	7.68628e-05	0.597573	-0.742813	0.00729526	1.14683	down
meta_667	N6-(2-Hydroxyethyl)adenosine	0.000122625	0.000138398	0.000128512	0.000147983	0.000112689	0.000123809	0.000183838	0.000104853	0.00014372	0.000127145	0.000155379	0.0001563	0.000108029	0.000111109	0.000102772	0.000125393	0.000125916	0.00013571	0.000117888	8.91402e-05	9.65831e-05	9.17196e-05	7.11406e-05	6.71165e-05	0.000125284	6.52615e-05	0.000108126	9.08421e-05	0.000105119	9.18981e-05	0.000183211	7.53455e-05	9.18796e-05	9.45095e-05	9.74981e-05	7.42312e-05	0.000128855	0.000190021	0.00012806	0.000102702	0.801984	-0.318355	0.0139987	1.05938	down
meta_672	1-Methylpiperidine-2-carboxylic acid	0.000207445	3.39395e-05	0.000120648	0.000183437	0.000142185	0.000500621	0.000238965	0.000107523	0.000212437	0.000196026	0.00035906	6.89811e-05	0.000169159	6.20493e-05	0.000148006	0.000319454	6.97718e-05	7.22692e-05	0.000262122	0.000144624	5.56528e-05	7.46688e-05	0.00010999	9.21197e-05	0.000282692	0.000123849	8.44399e-05	5.29217e-05	0.000141675	4.88054e-05	0.000109824	3.59411e-05	4.9924e-05	2.77052e-05	3.33441e-05	6.40214e-05	4.55942e-05	9.45664e-05	0.000180936	8.48741e-05	0.469083	-1.09208	0.00266552	1.24191	down
meta_678	3-Methyladipic acid	3.30967e-06	4.50236e-06	4.56718e-06	3.49066e-06	4.38481e-06	3.183e-06	1.98628e-06	5.8099e-06	4.22609e-06	5.08701e-06	5.10885e-06	3.28737e-06	3.42336e-06	3.96945e-06	2.06807e-06	4.68027e-06	1.66408e-06	6.36743e-06	2.98079e-06	4.49242e-06	1.54467e-06	3.27552e-06	3.57784e-06	3.14462e-06	3.51339e-06	2.9347e-06	2.64263e-06	4.02091e-06	3.94461e-06	4.2853e-06	3.43816e-06	2.50916e-06	2.48836e-06	2.3585e-06	2.62461e-06	2.80741e-06	3.45109e-06	3.09715e-06	3.92945e-06	3.09215e-06	0.786915	-0.34572	0.0138319	1.01992	down
meta_679	Pimelic acid	3.30967e-06	4.50236e-06	4.56718e-06	3.49066e-06	4.38481e-06	3.183e-06	1.98628e-06	5.8099e-06	4.22609e-06	5.08701e-06	5.10885e-06	3.28737e-06	3.42336e-06	3.96945e-06	2.06807e-06	4.68027e-06	1.66408e-06	6.36743e-06	2.98079e-06	4.49242e-06	1.54467e-06	3.27552e-06	3.57784e-06	3.14462e-06	3.51339e-06	2.9347e-06	2.64263e-06	4.02091e-06	3.94461e-06	4.2853e-06	3.43816e-06	2.50916e-06	2.48836e-06	2.3585e-06	2.62461e-06	2.80741e-06	3.45109e-06	3.09715e-06	3.92945e-06	3.09215e-06	0.786915	-0.34572	0.0138319	1.01992	down
meta_680	DL-2-Methylglutamic acid	4.46757e-06	1.35972e-05	9.15086e-06	5.49255e-06	1.07181e-05	8.16663e-06	9.44708e-06	1.05756e-05	8.2832e-06	1.02792e-05	8.65392e-06	1.26075e-05	5.99633e-06	1.04562e-05	6.66174e-06	1.13001e-05	1.01834e-05	3.47633e-06	8.84583e-06	8.41684e-06	6.23244e-06	7.18287e-06	4.37118e-06	6.40758e-06	7.17774e-06	5.02285e-06	7.17556e-06	5.54571e-06	3.15764e-06	4.78304e-06	6.17877e-06	5.43768e-06	4.81851e-06	3.48205e-06	6.29998e-06	4.11122e-06	5.13898e-06	9.78275e-06	8.83881e-06	5.6837e-06	0.643039	-0.637023	7.29812e-05	1.48448	down

## Sheet: B vs D
#ID	name	BX23	Bx24	Bx25	Bx26	Bx28	Bx37	Bx40	Bx52	Bx54	Bx56	Bx57	Bx59	Bx61	Bx62	Bx68	Bx72	Bx74	Bx80	Bx81	Bx88	Dc206	Dc263	Dc292	Dc312	Dc335	Dc339	Dc341	Dc342	Dx102	Dx111	Dx20	Dx25	Dx49	Dx73	Dx76	Dx79	Dx84	Dx94	B_Mean	D_Mean	Fold_change	log2FC	Pvalue	VIP	regulated
meta_1	L-Cystine	9.771e-06	7.44691e-06	8.99507e-06	1.16097e-05	1.03837e-05	7.90093e-06	9.18281e-06	9.11008e-06	7.71052e-06	5.21859e-06	9.38815e-06	7.82372e-06	1.21972e-05	6.17708e-06	1.05079e-05	5.22322e-06	6.89801e-06	8.58231e-06	4.8326e-06	5.77341e-06	2.08177e-06	3.90098e-06	4.43686e-06	4.2586e-06	8.03079e-06	7.79717e-06	4.20652e-06	5.02687e-06	5.68726e-06	4.78984e-06	1.14466e-05	4.80153e-06	3.35007e-06	6.54342e-06	5.04866e-06	4.57086e-06	3.73321e-06	5.37103e-06	8.23665e-06	5.28233e-06	0.641321	-0.640882	0.000130403	1.81433	down
meta_3	L-Aspartic Acid	0.000100139	0.000123963	0.000197202	0.000233194	0.000205549	0.000193271	0.000193788	0.000230255	0.000249941	0.000238827	0.000268691	0.000261101	0.000290001	0.000221595	0.000308108	0.000289652	0.000195489	0.000164753	0.000231049	0.000290483	0.000179193	0.000195855	0.000198348	0.000210813	0.000200883	0.000119826	0.000249922	0.000210169	0.000156849	0.000140784	0.000168483	0.000179556	0.000201602	0.000105949	0.000117541	0.000121353	0.000239714	0.000171251	0.000224353	0.000176005	0.784502	-0.350151	0.0041985	1.49216	down
meta_11	L-Asparagine Anhydrous	4.74517e-05	4.09012e-05	4.79935e-05	5.54078e-05	6.61112e-05	4.36746e-05	5.16372e-05	5.04713e-05	5.55113e-05	5.75124e-05	6.69665e-05	5.67281e-05	6.37976e-05	5.47889e-05	6.53367e-05	6.15284e-05	5.57668e-05	4.65587e-05	6.15795e-05	6.94686e-05	4.2689e-05	5.58151e-05	3.45996e-05	5.20536e-05	5.13994e-05	4.12788e-05	4.74225e-05	4.57466e-05	4.53335e-05	4.61844e-05	5.71443e-05	4.96613e-05	4.20181e-05	4.57318e-05	3.91617e-05	4.95766e-05	5.44848e-05	4.17972e-05	5.59596e-05	4.67832e-05	0.836018	-0.258394	0.000357061	1.72678	down
meta_13	L-Glutamine	0.00054049	0.00051778	0.000248576	0.00043206	0.000553135	0.000289778	0.000259096	0.000422466	0.000340301	0.000411135	0.000630503	0.000458747	0.000513386	0.000426421	0.000568	0.000403834	0.000475871	0.000493905	0.000443211	0.000546893	0.000319418	0.000322586	0.000270454	0.000282154	0.000386991	0.000255612	0.000339066	0.000251288	0.000335878	0.000250193	0.00044809	0.000387532	0.00030705	0.00039317	0.000267936	0.000408551	0.000241275	0.00027783	0.000448779	0.000319171	0.711198	-0.491678	4.94901e-05	1.83506	down
meta_14	L-Homocitrulline	1.27059e-05	8.29705e-06	6.39647e-06	7.7219e-06	6.06617e-06	6.08996e-06	1.06247e-05	4.11837e-06	6.64216e-06	6.27193e-06	6.56606e-06	6.52257e-06	3.38795e-06	3.48535e-06	5.79097e-06	7.31077e-06	1.03996e-05	7.34656e-06	7.46528e-06	1.64741e-05	1.76028e-05	1.04186e-05	1.22777e-05	8.4049e-06	8.43523e-06	4.97493e-06	5.20181e-06	7.67607e-06	7.12555e-06	2.20771e-05	3.09515e-05	4.44287e-06	6.59764e-06	1.09623e-05	1.58282e-05	8.16921e-06	1.71952e-05	1.65895e-05	7.48419e-06	1.19406e-05	1.59545	0.673959	0.0199024	1.26924	up
meta_17	N-Acetyl-L-Leucine	2.83998e-05	1.43335e-05	1.70235e-05	2.67157e-05	1.69504e-05	1.36523e-05	1.81513e-05	1.81203e-05	2.25265e-05	2.12071e-05	2.03719e-05	2.4424e-05	2.10985e-05	1.77217e-05	2.4929e-05	1.6438e-05	2.45487e-05	2.0306e-05	1.71253e-05	1.68808e-05	2.12255e-05	2.06176e-05	2.97742e-05	2.62039e-05	2.49229e-05	2.90174e-05	2.58208e-05	2.2236e-05	2.63438e-05	2.59424e-05	2.55655e-05	1.9264e-05	2.14564e-05	2.61791e-05	2.58046e-05	2.05352e-05	3.97191e-05	2.60974e-05	2.00462e-05	2.53737e-05	1.26576	0.340001	0.000713886	1.46222	up
meta_24	S-(5-Adenosy)-L-Homocysteine	5.83339e-06	4.66142e-06	4.78193e-06	5.28122e-06	2.80457e-06	6.06443e-06	7.34986e-06	6.7532e-06	7.6183e-06	1.02553e-05	5.50835e-06	8.08195e-06	4.80633e-06	6.30539e-06	1.23212e-05	7.13812e-06	9.84271e-06	6.47226e-06	8.04938e-06	5.02714e-06	9.04814e-06	9.08462e-06	6.67287e-06	7.47516e-06	1.15507e-05	5.53684e-06	9.14635e-06	7.87474e-06	1.0967e-05	1.08326e-05	1.36176e-05	9.97536e-06	1.02823e-05	9.22124e-06	1.07613e-05	8.33639e-06	1.11099e-05	1.22385e-05	6.74782e-06	9.65176e-06	1.43035	0.516369	0.000157372	1.50812	up
meta_28	4-Pyridoxic Acid	4.41729e-06	3.49867e-06	5.31587e-06	5.13939e-06	2.19383e-06	5.43104e-06	9.8186e-06	7.35395e-06	5.25826e-06	1.22469e-05	9.62267e-06	4.50714e-06	6.07945e-06	4.73232e-06	5.57226e-06	6.8314e-06	6.54108e-06	7.05985e-06	3.45292e-06	3.4767e-06	7.31822e-06	1.41718e-05	8.59974e-06	7.01091e-06	1.43715e-05	4.34164e-06	4.57027e-05	4.31878e-06	7.69022e-06	1.09402e-05	1.42336e-05	9.27444e-06	1.35053e-05	9.36617e-06	1.3622e-05	1.15599e-05	1.34274e-05	8.76714e-05	5.92748e-06	1.6507e-05	2.78482	1.47759	0.0382904	1.21128	up
meta_41	8-Hydroxyguanosine	1.90754e-06	1.19766e-06	2.10671e-06	1.68853e-06	2.71291e-06	2.20675e-06	1.34507e-06	2.48574e-06	1.8967e-06	1.80007e-06	3.1188e-06	1.39604e-06	2.6411e-06	1.60669e-06	3.53796e-06	1.70961e-06	1.1434e-06	2.01671e-06	1.5831e-06	4.10799e-06	1.54029e-06	1.43499e-06	1.61044e-06	1.74878e-06	1.66233e-06	1.16261e-06	2.10349e-06	1.18441e-06	1.4911e-06	2.18312e-06	2.55285e-06	1.13431e-06	2.00286e-06	1.36428e-06	1.40458e-06	1.15565e-06	2.25252e-06	1.43358e-06	2.11045e-06	1.63457e-06	0.774509	-0.368646	0.0254138	1.14262	down
meta_48	Norepinephrine	3.12741e-07	2.18883e-06	2.49918e-06	2.90277e-06	1.36465e-06	2.38958e-06	3.83817e-06	3.14666e-06	4.52253e-06	4.12964e-06	2.60181e-06	2.85034e-06	2.579e-06	2.96871e-06	3.27264e-06	3.16126e-06	3.68128e-06	1.56612e-06	3.3113e-06	3.18766e-06	1.95968e-06	2.2579e-06	1.35784e-06	1.8744e-06	2.89913e-06	1.35901e-06	2.72461e-06	2.59434e-06	1.1698e-06	2.08883e-06	2.16139e-06	3.52659e-06	1.7641e-06	2.01962e-06	2.225e-06	1.67362e-06	2.609e-06	2.08329e-06	2.82374e-06	2.13045e-06	0.754479	-0.406448	0.0114656	1.29203	down
meta_51	Citramalic Acid	3.28995e-06	2.73694e-06	2.32825e-06	2.74569e-06	2.08379e-06	2.10493e-06	3.73074e-06	5.67031e-06	3.78357e-06	4.54157e-06	3.19866e-06	4.63063e-06	4.31878e-06	5.55986e-06	3.03686e-06	5.91139e-06	5.63806e-06	2.68505e-06	4.14054e-06	1.48176e-06	2.47453e-06	3.61867e-06	5.0219e-06	4.34091e-06	3.87498e-06	2.72449e-06	5.99357e-06	5.67635e-06	4.53309e-06	5.06651e-06	8.21251e-06	7.16584e-06	6.92467e-06	6.62412e-06	8.65251e-06	3.73869e-06	8.28687e-06	5.78799e-06	3.68087e-06	5.48434e-06	1.48996	0.575273	0.00205644	1.43726	up
meta_54	D-Glucose	1.3106e-05	1.26476e-05	9.46429e-06	1.73657e-05	1.41728e-05	1.24211e-05	1.00845e-05	1.46942e-05	8.24444e-06	1.29152e-05	1.08894e-05	1.27719e-05	1.32076e-05	1.08998e-05	9.7778e-06	1.04827e-05	1.06066e-05	1.41142e-05	1.02529e-05	1.36156e-05	2.1048e-05	2.34732e-05	2.3965e-05	1.37461e-05	1.17388e-05	2.90795e-05	2.32932e-05	1.4982e-05	2.26832e-05	3.29476e-05	1.2963e-05	1.03242e-05	1.69139e-05	1.50042e-05	1.33053e-05	1.69571e-05	2.48177e-05	1.89934e-05	1.20867e-05	1.92353e-05	1.59144	0.670333	0.000171801	1.82291	up
meta_55	D-Mannose	1.3106e-05	1.26476e-05	9.46429e-06	1.73657e-05	1.41728e-05	1.24211e-05	1.00845e-05	1.46942e-05	8.24444e-06	1.29152e-05	1.08894e-05	1.27719e-05	1.32076e-05	1.08998e-05	9.7778e-06	1.04827e-05	1.06066e-05	1.41142e-05	1.02529e-05	1.36156e-05	2.1048e-05	2.34732e-05	2.3965e-05	1.37461e-05	1.17388e-05	2.90795e-05	2.32932e-05	1.4982e-05	2.26832e-05	3.29476e-05	1.2963e-05	1.03242e-05	1.69139e-05	1.50042e-05	1.33053e-05	1.69571e-05	2.48177e-05	1.89934e-05	1.20867e-05	1.92353e-05	1.59144	0.670333	0.000171801	1.82291	up
meta_62	D-Glucoronic Acid	8.65248e-06	1.07254e-05	6.14091e-06	7.45334e-06	6.56013e-06	7.14307e-06	1.03937e-05	7.97286e-06	5.09052e-06	1.39928e-05	5.08775e-06	1.0351e-05	7.08407e-06	4.43971e-06	3.09491e-06	7.37699e-06	1.16711e-05	8.76532e-06	4.30212e-06	6.45237e-06	1.89896e-05	1.77554e-05	1.62624e-05	1.52393e-05	1.02097e-05	1.98254e-05	1.48323e-05	1.1816e-05	1.95989e-05	2.76464e-05	1.15168e-05	8.07625e-06	1.40012e-05	1.35067e-05	1.33318e-05	1.35489e-05	2.85126e-05	2.22745e-05	7.63752e-06	1.64969e-05	2.15998	1.11102	2.44231e-06	2.17402	up
meta_63	D-Glyceric Acid	2.31838e-06	1.26666e-06	1.90909e-06	4.80541e-06	2.19833e-06	2.66261e-06	5.69692e-06	2.26891e-06	6.77596e-06	4.30824e-06	2.02443e-06	2.23603e-06	3.2262e-06	5.8942e-06	2.33548e-06	2.18627e-06	1.99545e-06	8.57234e-07	2.51129e-06	4.464e-07	4.48078e-06	7.65964e-06	6.30149e-06	5.36184e-06	2.33278e-06	6.52323e-06	5.20523e-06	8.47172e-06	3.7446e-06	6.87039e-06	2.11362e-06	1.40745e-06	3.77002e-06	4.49805e-06	3.23867e-06	2.64646e-06	7.59446e-06	5.55185e-06	2.89618e-06	4.87624e-06	1.68368	0.75162	0.00323949	1.22734	up
meta_76	3-Hydroxy-3-Methyl Butyric Acid	7.02016e-05	5.61243e-05	6.4309e-05	0.000113079	6.30312e-05	7.70117e-05	0.000128397	0.000104794	0.00014462	0.000170094	0.00011101	0.000156358	8.68873e-05	0.000106886	0.000121954	6.70465e-05	0.000163459	0.000104184	8.7959e-05	7.72182e-05	0.00017725	0.00011019	0.00019424	0.000163142	9.96328e-05	0.000339024	0.00014401	0.000162288	0.00010309	0.00016808	0.000108469	7.40418e-05	9.40172e-05	0.000136478	0.000139045	0.00010965	0.000307805	9.78926e-05	0.000103731	0.000151575	1.46123	0.547179	0.0159871	1.03971	up
meta_80	4-Hydroxy-2-Oxoglutaric Acid	9.84955e-06	9.79226e-06	6.49465e-06	1.18505e-05	1.22409e-05	7.96746e-06	1.68202e-05	8.5665e-06	1.49167e-05	1.47985e-05	1.3662e-05	1.54844e-05	1.49539e-05	1.71657e-05	1.14802e-05	7.67449e-06	7.51264e-06	8.34187e-06	8.32238e-06	6.8594e-06	1.88146e-05	1.37052e-05	2.28754e-05	1.55676e-05	9.30563e-06	1.31527e-05	1.3996e-05	2.16722e-05	2.01879e-05	1.54055e-05	6.88633e-06	8.29807e-06	1.24269e-05	2.08943e-05	2.14603e-05	1.78451e-05	1.65474e-05	2.0664e-05	1.12377e-05	1.60947e-05	1.43221	0.518241	0.00149496	1.31443	up
meta_86	Guanidinoethyl Sulfonate	2.36751e-05	2.13289e-05	2.61548e-05	2.11325e-05	2.38954e-05	2.62274e-05	2.13361e-05	2.39462e-05	2.09217e-05	2.01415e-05	2.646e-05	2.88227e-05	2.96153e-05	1.88013e-05	3.12547e-05	2.41756e-05	1.7867e-05	2.4319e-05	2.07242e-05	2.42797e-05	2.29275e-05	2.10543e-05	1.71115e-05	2.01188e-05	2.15392e-05	1.74457e-05	2.83515e-05	2.14907e-05	2.26705e-05	1.68599e-05	2.84987e-05	2.18175e-05	2.15242e-05	2.4184e-05	1.85553e-05	2.05227e-05	1.65173e-05	2.24835e-05	2.37539e-05	2.13152e-05	0.897331	-0.156288	0.0392708	1.10966	down
meta_91	L-Homoserine	0.000124732	8.33705e-05	0.000125545	0.000121306	0.000127127	0.000102575	0.000106167	0.000119338	0.000146071	0.000128212	0.0002075	0.000133314	0.00014011	0.000183632	0.000150414	0.000132995	0.000117414	0.000115503	0.000105057	0.000199609	8.68381e-05	6.96463e-05	5.63964e-05	7.24279e-05	9.68564e-05	5.00041e-05	0.000104447	8.08117e-05	5.86688e-05	3.09346e-05	0.000152314	8.01005e-05	8.03232e-05	9.66432e-05	9.53398e-05	0.00010013	7.71456e-05	7.3293e-05	0.000133499	8.124e-05	0.608542	-0.716572	2.63345e-06	2.08308	down
meta_101	LPS(22:6/0:0)	3.72903e-06	3.28505e-06	2.83204e-06	4.64177e-06	1.80943e-06	3.25126e-06	5.1894e-06	3.78247e-06	2.94292e-06	3.52233e-06	3.69978e-06	2.60771e-06	2.34155e-06	2.12702e-06	2.3995e-06	5.19749e-06	5.2526e-06	5.65394e-06	5.9505e-06	3.63263e-06	6.07112e-06	5.32505e-06	5.11079e-06	5.34728e-06	6.02863e-06	6.02167e-06	3.27774e-06	4.54155e-06	4.45456e-06	4.90253e-06	5.37966e-06	1.11667e-05	8.23957e-06	7.53355e-06	6.72999e-06	9.41819e-06	5.81838e-06	5.0304e-06	3.69242e-06	6.13319e-06	1.66102	0.732071	7.59913e-05	1.82481	up
meta_102	LPG(18:1/0:0)	5.58362e-05	5.23171e-05	6.66019e-05	6.02438e-05	3.79886e-05	6.65838e-05	7.61044e-05	5.52833e-05	6.06471e-05	5.20457e-05	3.76262e-05	4.17413e-05	4.7659e-05	5.49467e-05	4.14646e-05	7.05497e-05	6.44995e-05	6.99692e-05	6.86122e-05	6.38036e-05	7.31488e-05	5.32375e-05	7.16805e-05	4.94893e-05	7.46205e-05	6.14959e-05	5.91978e-05	5.07009e-05	5.80063e-05	5.24247e-05	6.83926e-05	9.61071e-05	7.79436e-05	7.38602e-05	6.26163e-05	7.85138e-05	5.96067e-05	8.03133e-05	5.72262e-05	6.6742e-05	1.16628	0.221919	0.0203441	1.32162	up
meta_103	LPE(18:1/0:0)	0.00315138	0.00153289	0.00187438	0.000383868	0.00036712	0.00140795	0.000782451	0.000628369	0.000900543	0.000735621	0.000456028	0.000754692	0.000518215	0.000520427	0.000333086	0.00103344	0.00120295	0.00116241	0.00173235	0.000699318	0.00159548	0.00148568	0.00156826	0.000823237	0.00143448	0.00231535	0.00111406	0.000914531	0.00146767	0.00291206	0.00151079	0.00282293	0.00132952	0.00124274	0.00132574	0.0029977	0.00110509	0.00146461	0.00100887	0.001635	1.62061	0.696541	0.00708945	1.56817	up
meta_104	LPE(18:0/0:0)	0.00358605	0.00122908	0.00162836	0.000907294	0.000489493	0.00155644	0.00104815	0.000673204	0.0012686	0.00104597	0.000635265	0.000800776	0.000615247	0.000797756	0.000697485	0.00144975	0.00134275	0.0012242	0.00123641	0.00118162	0.00196084	0.00102104	0.00190076	0.0013118	0.00204274	0.00254458	0.00122798	0.00119454	0.00170428	0.00272411	0.00156954	0.00397707	0.00197162	0.00125475	0.00130266	0.00340274	0.00133334	0.00205313	0.0011707	0.00191653	1.63709	0.71113	0.00389064	1.5761	up
meta_105	LPE(16:0/0:0)	0.0170852	0.00918081	0.00732799	0.0048173	0.00326647	0.00825899	0.00447527	0.00291419	0.00623272	0.00611162	0.00279443	0.00565168	0.00271948	0.00537432	0.00448007	0.00677981	0.00604029	0.00595507	0.00558465	0.00715516	0.00986363	0.00632721	0.0115412	0.00825989	0.00972382	0.0133936	0.00810584	0.0075342	0.0127248	0.0130849	0.0109012	0.0194831	0.00913771	0.00744617	0.00891614	0.02085	0.00792478	0.0131006	0.00611028	0.0110177	1.80314	0.850515	0.000201189	1.88898	up
meta_106	LPE(14:0/0:0)	3.34658e-05	2.28897e-05	2.34803e-05	9.68387e-06	4.39104e-06	2.40693e-05	1.13316e-05	8.95247e-06	2.01004e-05	1.54626e-05	5.15992e-06	1.75316e-05	6.45508e-06	5.82002e-06	9.00095e-06	1.91652e-05	1.83753e-05	1.11372e-05	8.6048e-06	1.73424e-05	3.20614e-05	7.82965e-06	5.26386e-05	1.75458e-05	2.90286e-05	7.48502e-05	1.9074e-05	1.63563e-05	3.53763e-05	3.14029e-05	4.41982e-05	5.17994e-05	1.92017e-05	1.59411e-05	2.53001e-05	7.38393e-05	1.15383e-05	3.39048e-05	1.4621e-05	3.28826e-05	2.249	1.16928	0.00137415	1.66231	up
meta_107	LPA(0:0/18:0)	8.76089e-05	7.33691e-05	9.98357e-05	8.0905e-05	4.81076e-05	0.000109975	0.0001319	7.89532e-05	0.00010416	7.32541e-05	4.7336e-05	5.82193e-05	5.57369e-05	8.71277e-05	4.29363e-05	0.000102996	9.44481e-05	0.000111485	0.000109959	8.33196e-05	0.000123603	8.88354e-05	0.000157431	8.16685e-05	0.000131868	9.97623e-05	0.000100397	9.13132e-05	0.000109278	9.56534e-05	0.000108697	0.000273482	0.000186208	0.00014951	0.0001354	0.000177205	7.89643e-05	0.000166921	8.40816e-05	0.0001309	1.55682	0.6386	0.0011798	1.68885	up
meta_108	LPA(0:0/16:0)	0.000247239	0.000292621	0.000371945	0.000276185	0.00018834	0.000354852	0.000422923	0.00026154	0.000381388	0.000334317	0.000185243	0.000257758	0.000187556	0.00028522	0.00018284	0.000305157	0.000311343	0.000332731	0.000381281	0.000289426	0.000424047	0.000350415	0.000579366	0.000416037	0.000407026	0.000516384	0.000361159	0.000397935	0.000499833	0.000579842	0.00032228	0.000886419	0.000546181	0.000731028	0.000412632	0.000665778	0.000349341	0.000722194	0.000292495	0.000509328	1.74132	0.800181	2.04761e-05	2.11315	up
meta_109	13-HOTrE	7.45836e-06	5.28403e-06	6.00096e-06	5.86486e-06	5.83635e-06	5.63653e-06	4.80239e-06	6.11645e-06	6.66845e-06	7.83717e-06	5.93893e-06	9.26066e-06	6.72645e-06	1.16451e-05	4.84528e-06	8.61536e-06	1.07803e-05	5.61775e-06	7.88087e-06	7.95547e-06	1.02875e-05	1.92995e-05	1.19567e-05	1.26404e-05	9.70487e-06	4.84966e-06	1.53443e-05	7.44221e-06	6.19494e-06	6.17382e-06	5.15113e-06	8.22541e-06	8.7809e-06	6.04105e-06	6.51618e-06	6.52775e-06	1.16561e-05	1.2754e-05	7.03858e-06	9.41925e-06	1.33823	0.420327	0.0276257	1.09294	up
meta_117	FFA(20:2)	9.54859e-07	5.81895e-07	1.72143e-06	7.34628e-07	6.66398e-07	1.66599e-06	1.72342e-06	7.33168e-07	1.53726e-06	9.96695e-07	7.50397e-07	2.00494e-06	8.61476e-07	2.44396e-06	9.79316e-07	1.08368e-06	1.03446e-06	1.37694e-06	8.45777e-07	6.66839e-07	2.11071e-06	3.66819e-06	1.3229e-06	3.43376e-06	9.82059e-07	5.63358e-06	2.30641e-06	2.48503e-06	1.68401e-06	2.89797e-06	8.84829e-07	1.80346e-06	2.65134e-06	1.91479e-06	1.12011e-06	1.2295e-06	1.65023e-06	2.91721e-06	1.16818e-06	2.26089e-06	1.9354	0.952634	0.00141299	1.53411	up
meta_122	Uridine 5-Monophosphate	2.72539e-06	3.84867e-06	3.79233e-06	1.86894e-06	5.66614e-06	2.21707e-06	1.74032e-06	4.75813e-06	5.64128e-06	4.46086e-06	6.14644e-06	4.97383e-06	2.64167e-06	6.83751e-06	5.785e-06	4.31188e-06	5.27342e-06	6.55839e-06	5.15991e-06	4.1189e-06	6.72722e-06	3.85432e-06	8.0316e-06	6.1177e-06	5.35004e-06	5.00764e-06	5.34031e-06	6.25975e-06	4.39237e-06	6.97814e-06	4.55749e-06	5.16629e-06	7.01666e-06	5.51306e-06	9.53007e-06	5.80115e-06	7.87014e-06	8.01844e-06	4.4263e-06	6.19624e-06	1.39987	0.485291	0.00100565	1.4026	up
meta_123	N6-Succinyl Adenosine	1.64718e-06	6.80764e-07	1.14234e-06	1.09924e-06	7.50399e-07	6.28068e-07	1.13589e-06	1.20216e-06	1.78531e-06	1.5519e-06	1.42756e-06	1.50438e-06	1.21645e-06	8.67988e-07	2.74831e-06	2.57383e-06	1.2572e-06	1.00985e-06	2.11829e-06	1.02367e-06	1.99686e-06	3.73708e-06	1.03343e-06	2.24499e-06	2.64739e-06	5.89983e-07	2.07165e-06	1.36169e-06	3.69102e-06	1.85454e-06	4.80949e-06	1.8389e-06	1.87537e-06	2.38461e-06	1.58294e-06	2.77457e-06	2.0686e-06	2.66768e-06	1.36854e-06	2.2906e-06	1.67376	0.74309	0.00220522	1.31802	up
meta_125	2-(Dimethylamino)Guanosine	9.63494e-06	6.5275e-06	9.8143e-06	8.82069e-06	8.7967e-06	9.45951e-06	1.18766e-05	1.09791e-05	1.33752e-05	1.66395e-05	1.22117e-05	1.37599e-05	7.94495e-06	1.06882e-05	1.27013e-05	1.31096e-05	1.30724e-05	1.22172e-05	1.00486e-05	1.01943e-05	1.58969e-05	1.41133e-05	1.03097e-05	1.16681e-05	1.81209e-05	8.80144e-06	1.6292e-05	1.23153e-05	1.77673e-05	1.34111e-05	2.63259e-05	1.29229e-05	1.34215e-05	1.48557e-05	1.37948e-05	1.40801e-05	2.23472e-05	2.9301e-05	1.10936e-05	1.58747e-05	1.43098	0.517003	0.00191835	1.43561	up
meta_132	D-Fructose 6-Phosphate-Disodium Salt	3.47088e-06	2.74201e-06	2.76677e-06	2.41567e-06	2.96991e-06	2.07496e-06	3.86883e-06	4.85146e-06	2.65303e-06	3.19976e-06	7.60118e-07	2.41243e-06	4.16585e-06	2.13306e-06	7.93164e-07	3.72986e-06	4.03605e-06	3.13014e-06	3.57806e-06	4.39854e-06	1.36649e-05	9.05641e-06	6.90219e-06	6.74003e-06	4.78222e-06	1.0357e-05	6.85437e-06	6.77388e-06	2.64261e-05	1.48482e-05	8.3322e-06	4.69881e-06	6.15628e-06	5.69549e-06	1.19454e-05	9.9527e-06	4.09187e-06	8.4145e-06	3.00753e-06	9.20515e-06	3.0607	1.61386	0.000107744	1.87119	up
meta_134	3-Methyl-2-Oxobutanoic Acid	2.47651e-06	2.67303e-06	1.76569e-06	3.57333e-06	3.96138e-06	2.5608e-06	3.26396e-06	2.56297e-06	4.44948e-06	2.55945e-06	3.53236e-06	2.52918e-06	1.76136e-06	4.44148e-06	1.44902e-06	3.9816e-06	2.13376e-06	2.34524e-06	2.36745e-06	1.92492e-06	2.29918e-06	4.2132e-06	5.48259e-06	5.20154e-06	4.04997e-06	5.14786e-06	3.01739e-06	5.05554e-06	2.8297e-06	3.75741e-06	2.5884e-06	3.26395e-06	2.74745e-06	3.54059e-06	3.72216e-06	3.63143e-06	3.95534e-06	4.11039e-06	2.81565e-06	3.81189e-06	1.35382	0.437041	0.00217662	1.25488	up
meta_139	2-Deoxyribose 1-Phosphate	3.69108e-05	3.66201e-05	2.7983e-05	4.49949e-05	2.04368e-05	1.83119e-05	3.8307e-05	3.76589e-05	4.15558e-05	5.51764e-05	3.27051e-05	3.95278e-05	1.94906e-05	6.4657e-05	3.38874e-05	4.8098e-05	4.74708e-05	5.32619e-05	5.11571e-05	3.29374e-05	5.35378e-05	5.59736e-05	4.73419e-05	5.43983e-05	5.39515e-05	4.3263e-05	4.82423e-05	6.37779e-05	5.96213e-05	5.33861e-05	5.24131e-05	4.81074e-05	4.29832e-05	6.55456e-05	6.56727e-05	4.63802e-05	6.59268e-05	5.73493e-05	3.90574e-05	5.43262e-05	1.39093	0.476052	5.10393e-05	1.68519	up
meta_143	Hydroxyphenyllactic acid	4.25284e-06	1.01969e-06	2.41233e-06	3.39612e-06	2.556e-06	1.75777e-06	6.85766e-06	5.19321e-06	6.61561e-06	6.21171e-06	2.78118e-06	4.22688e-06	2.166e-06	2.54277e-06	5.01994e-06	6.60079e-06	5.67268e-06	4.58049e-06	4.2327e-06	1.96084e-06	6.66071e-06	7.43035e-06	5.23967e-06	4.8718e-06	6.81989e-06	4.17136e-06	7.07187e-06	6.60639e-06	7.17457e-06	6.73039e-06	1.26623e-05	3.95241e-06	4.12936e-06	8.41316e-06	8.2621e-06	7.82873e-06	1.41317e-05	1.21679e-05	4.00286e-06	7.46248e-06	1.86429	0.898623	0.000166996	1.66482	up
meta_145	L-Erythrulose	2.35045e-06	1.43241e-06	2.35992e-06	3.43684e-06	1.06331e-06	1.08103e-06	4.44775e-06	2.71979e-06	2.06341e-06	4.70134e-06	4.37928e-06	4.8346e-06	2.78158e-06	1.10691e-06	3.85604e-06	3.17818e-06	4.25711e-06	3.71156e-06	2.8497e-06	2.76233e-06	3.73038e-06	6.83257e-06	1.9314e-06	3.76658e-06	3.71134e-06	2.38255e-06	4.3547e-06	1.6959e-06	4.51447e-06	4.41727e-06	8.65846e-06	2.78366e-06	4.46835e-06	2.72287e-06	5.52371e-06	5.32079e-06	5.18157e-06	8.22929e-06	2.96868e-06	4.45699e-06	1.50134	0.586251	0.00998317	1.19243	up
meta_146	N-lactoyl-phenylalanine	2.23012e-05	2.89317e-05	2.59792e-05	2.85945e-05	1.19586e-05	3.2111e-05	5.51417e-05	3.5489e-05	6.66444e-05	4.73901e-05	4.22692e-05	5.11096e-05	2.99066e-05	3.46013e-05	5.5108e-05	7.02979e-05	4.17099e-05	3.3964e-05	6.7523e-05	3.69356e-05	5.31724e-05	0.000100843	4.68541e-05	9.31982e-05	0.000103952	3.54948e-05	9.36638e-05	6.08907e-05	7.63423e-05	7.24876e-05	7.89861e-05	6.78683e-05	6.44596e-05	6.42955e-05	9.25016e-05	0.000100485	0.000102259	0.000164368	4.08983e-05	8.17846e-05	1.99971	0.999788	1.59738e-05	1.93971	up
meta_148	Glycerophosphoric acid	8.28871e-06	1.93158e-05	2.50512e-05	1.03682e-05	2.58075e-05	3.05165e-05	2.87185e-05	2.67557e-05	1.98634e-05	1.59479e-05	1.71545e-05	1.54229e-05	2.21391e-05	1.33284e-05	2.05377e-05	1.87956e-05	2.7588e-05	2.55159e-05	2.92356e-05	4.16338e-05	3.36657e-05	1.7368e-05	3.57042e-05	2.28855e-05	3.93558e-05	2.06926e-05	1.81725e-05	2.37448e-05	1.27349e-05	4.04977e-05	2.24306e-05	2.09113e-05	4.43392e-05	3.12635e-05	5.76893e-05	4.2997e-05	1.66118e-05	2.78794e-05	2.20992e-05	2.93858e-05	1.32972	0.41112	0.0376626	1.01974	up
meta_149	D-Malic acid	2.60228e-06	1.52869e-06	1.63072e-06	3.09843e-06	2.6996e-06	1.18439e-06	2.56895e-06	2.79338e-06	1.22206e-06	2.96795e-06	4.35146e-07	1.83828e-06	9.82329e-07	3.67265e-06	2.86134e-06	1.88186e-06	1.4303e-06	4.48662e-06	2.72456e-06	1.58791e-06	3.35962e-06	2.8705e-06	5.58702e-06	3.96267e-06	1.03301e-06	5.87777e-06	1.13953e-06	3.05167e-06	4.94577e-06	7.52012e-06	1.82209e-06	1.45247e-06	3.98166e-06	3.42029e-06	2.42443e-06	2.93382e-06	5.58995e-06	4.46253e-06	2.20987e-06	3.63527e-06	1.64501	0.7181	0.00607622	1.43198	up
meta_151	O-Acetyl-L-serine	9.83999e-06	1.15812e-05	9.54671e-06	1.01583e-05	1.36586e-05	8.92909e-06	9.60964e-06	1.11895e-05	9.45503e-06	8.00505e-06	1.1407e-05	8.86111e-06	8.40184e-06	6.62278e-06	1.2243e-05	1.02401e-05	7.88161e-06	8.30451e-06	7.72234e-06	8.01489e-06	8.04032e-06	5.15894e-06	5.91732e-06	5.36419e-06	8.56804e-06	5.83149e-06	5.49295e-06	5.49098e-06	6.09171e-06	6.73508e-06	9.39361e-06	6.91636e-06	4.83154e-06	8.67382e-06	7.76851e-06	6.98229e-06	6.59789e-06	5.60116e-06	9.58362e-06	6.63646e-06	0.692479	-0.530157	1.27241e-06	2.094	down
meta_167	(±)12-HEPE	1.53392e-05	2.23433e-05	3.22824e-05	1.78903e-05	8.95698e-06	1.27413e-05	8.60454e-06	1.12151e-05	4.78898e-05	4.4742e-05	2.89688e-05	3.52145e-05	9.61573e-06	3.08035e-05	7.44146e-06	6.43978e-05	7.75979e-05	1.1807e-05	3.94709e-05	2.55268e-05	3.71353e-05	3.16152e-05	0.000108282	0.000111899	0.000109888	4.55527e-06	7.61162e-05	5.13202e-05	5.63191e-05	2.46115e-05	3.39273e-05	6.84788e-05	6.70505e-05	1.63879e-05	5.73512e-05	3.29027e-05	4.70595e-05	0.000105393	2.76425e-05	5.77941e-05	2.09077	1.06403	0.00247902	1.44808	up
meta_169	(±)15-HEPE	1.53392e-05	2.23433e-05	3.22824e-05	1.78903e-05	8.95698e-06	1.27413e-05	8.60454e-06	1.12151e-05	4.78898e-05	4.4742e-05	2.89688e-05	3.52145e-05	9.61573e-06	3.08035e-05	7.44146e-06	6.43978e-05	7.75979e-05	1.1807e-05	3.94709e-05	2.55268e-05	3.71353e-05	3.16152e-05	0.000108282	0.000111899	0.000109888	4.55527e-06	7.61162e-05	5.13202e-05	5.63191e-05	2.46115e-05	3.39273e-05	6.84788e-05	6.70505e-05	1.63879e-05	5.73512e-05	3.29027e-05	4.70595e-05	0.000105393	2.76425e-05	5.77941e-05	2.09077	1.06403	0.00247902	1.44808	up
meta_172	(±)18-HEPE	1.53392e-05	2.23433e-05	3.22824e-05	1.78903e-05	8.95698e-06	1.27413e-05	8.60454e-06	1.12151e-05	4.78898e-05	4.4742e-05	2.89688e-05	3.52145e-05	9.61573e-06	3.08035e-05	7.44146e-06	6.43978e-05	7.75979e-05	1.1807e-05	3.94709e-05	2.55268e-05	3.71353e-05	3.16152e-05	0.000108282	0.000111899	0.000109888	4.55527e-06	7.61162e-05	5.13202e-05	5.63191e-05	2.46115e-05	3.39273e-05	6.84788e-05	6.70505e-05	1.63879e-05	5.73512e-05	3.29027e-05	4.70595e-05	0.000105393	2.76425e-05	5.77941e-05	2.09077	1.06403	0.00247902	1.44808	up
meta_183	19(S)-HETE	2.16378e-07	1.19208e-07	3.59084e-07	4.39746e-07	3.27566e-07	4.35327e-07	4.94952e-07	3.05333e-07	5.24881e-07	5.87801e-07	3.90713e-07	5.55472e-07	2.36455e-07	5.24468e-07	4.06348e-07	4.17809e-07	7.55658e-07	3.74735e-07	3.39735e-07	3.24893e-07	2.54876e-07	1.29495e-06	7.31809e-07	1.06408e-06	6.51342e-07	2.84202e-07	9.38602e-07	1.10519e-06	5.97137e-07	5.34108e-07	3.62922e-07	5.28863e-07	5.95142e-07	3.69431e-07	4.8119e-07	7.00562e-07	5.11132e-08	1.4556e-06	4.06828e-07	6.66729e-07	1.63885	0.71268	0.0116814	1.14779	up
meta_184	20-HETE	2.16378e-07	1.19208e-07	3.59084e-07	4.39746e-07	3.27566e-07	4.35327e-07	4.94952e-07	3.05333e-07	5.24881e-07	5.87801e-07	3.90713e-07	5.55472e-07	2.36455e-07	5.24468e-07	4.06348e-07	4.17809e-07	7.55658e-07	3.74735e-07	3.39735e-07	3.24893e-07	2.54876e-07	1.29495e-06	7.31809e-07	1.06408e-06	6.51342e-07	2.84202e-07	9.38602e-07	1.10519e-06	5.97137e-07	5.34108e-07	3.62922e-07	5.28863e-07	5.95142e-07	3.69431e-07	4.8119e-07	7.00562e-07	5.11132e-08	1.4556e-06	4.06828e-07	6.66729e-07	1.63885	0.71268	0.0116814	1.14779	up
meta_192	Myoinositol	1.3106e-05	1.26476e-05	9.46429e-06	1.73657e-05	1.41728e-05	1.24211e-05	1.00845e-05	1.46942e-05	8.24444e-06	1.29152e-05	1.08894e-05	1.27719e-05	1.32076e-05	1.08998e-05	9.7778e-06	1.04827e-05	1.06066e-05	1.41142e-05	1.02529e-05	1.36156e-05	2.1048e-05	2.34732e-05	2.3965e-05	1.37461e-05	1.17388e-05	2.90795e-05	2.32932e-05	1.4982e-05	2.26832e-05	3.29476e-05	1.2963e-05	1.03242e-05	1.69139e-05	1.50042e-05	1.33053e-05	1.69571e-05	2.48177e-05	1.89934e-05	1.20867e-05	1.92353e-05	1.59144	0.670333	0.000171801	1.82291	up
meta_194	FFA(9:0)	3.22405e-06	2.85506e-06	2.83674e-06	2.92274e-06	3.13394e-06	2.35129e-06	2.89058e-06	3.535e-06	3.12827e-06	2.22713e-06	2.91881e-06	2.77106e-06	4.14764e-06	3.35482e-06	3.68018e-06	2.74418e-06	3.09032e-06	2.27681e-06	3.05936e-06	3.0846e-06	2.25287e-06	2.64199e-06	3.11055e-06	3.13524e-06	3.04542e-06	2.17373e-06	2.75154e-06	2.17913e-06	2.89278e-06	3.26918e-06	2.65538e-06	2.53119e-06	2.81711e-06	1.91442e-06	2.83047e-06	1.87625e-06	2.32661e-06	1.78308e-06	3.01163e-06	2.56594e-06	0.852011	-0.231056	0.00517488	1.36901	down
meta_199	N-acetylornithine	0.0002325	0.000193535	0.000180358	0.000340161	0.000294686	0.000189529	0.000227261	0.000186557	0.000195396	0.000246115	0.000225911	0.000358755	0.000258073	0.000306266	0.000200118	0.000202039	0.000329339	0.000247529	0.000191985	0.000242293	0.000178627	0.000129483	0.000169412	0.000210838	0.000253674	0.000188644	0.000153681	0.00023688	0.000230619	0.000308728	0.000261448	0.000111204	0.000283307	0.000169375	0.000172069	0.00010881	0.000247862	0.00020664	0.00024242	0.000201183	0.829895	-0.268999	0.0316817	1.07891	down
meta_200	D-Glucosamine 6-Phosphate	4.48716e-06	2.65404e-06	3.58752e-06	3.99271e-06	3.38382e-06	3.6912e-06	2.64389e-06	3.83585e-06	2.60588e-06	2.6062e-06	5.1609e-06	3.42479e-06	3.97305e-06	2.34131e-06	3.82633e-06	3.18401e-06	2.99419e-06	3.31839e-06	3.26474e-06	4.07308e-06	3.84308e-06	2.16756e-06	3.33712e-06	2.21969e-06	3.01752e-06	3.3167e-06	3.50432e-06	2.78664e-06	2.41791e-06	3.26164e-06	3.62153e-06	2.66598e-06	2.65732e-06	2.98439e-06	2.80512e-06	2.09157e-06	2.67501e-06	2.51314e-06	3.45245e-06	2.88257e-06	0.834934	-0.260267	0.00733053	1.26062	down
meta_208	Uric acid	0.000271274	0.00014726	0.000140987	0.000543342	3.23536e-05	0.000458342	0.00137035	0.000913992	0.00291105	0.00179334	0.000580636	0.000244915	0.000164767	0.000450623	0.000892054	0.00133323	0.000769543	0.000520571	0.000849851	0.000156896	0.00103913	0.00144539	0.000651253	0.00139066	0.00273935	0.000394277	0.00109997	0.00100342	0.00114785	0.00207796	0.00196731	0.00105744	0.000521494	0.00129497	0.00178615	0.00159071	0.000548861	0.00237949	0.000727269	0.00134087	1.84371	0.882611	0.00828405	1.01474	up
meta_210	3-hydroxyphenylacetic acid	2.13083e-05	1.18046e-05	9.93918e-06	2.23007e-05	1.52415e-05	1.45448e-05	2.48851e-05	1.32678e-05	2.67103e-05	2.82908e-05	1.0667e-05	1.42562e-05	1.02468e-05	2.79232e-05	1.71725e-05	1.79154e-05	1.53481e-05	2.8779e-05	1.73401e-05	1.2566e-05	2.60871e-05	1.74265e-05	1.20379e-05	1.31562e-05	5.25994e-06	5.58109e-06	1.96513e-05	5.5482e-06	4.98149e-06	6.9103e-06	7.11995e-06	8.47177e-06	8.36719e-06	3.79407e-06	4.6083e-06	4.4961e-06	8.96572e-06	5.92889e-06	1.80254e-05	9.35511e-06	0.518997	-0.946203	0.000143105	1.69515	down
meta_212	7-Methylguanine	2.94413e-06	2.76201e-06	2.61327e-06	2.57732e-06	2.26957e-06	2.48895e-06	3.74306e-06	2.28676e-06	3.73059e-06	3.88792e-06	3.18443e-06	3.50917e-06	3.28235e-06	4.44886e-06	3.55213e-06	3.20432e-06	3.73509e-06	3.66686e-06	3.67271e-06	3.33285e-06	3.29491e-06	3.31555e-06	2.82202e-06	2.24413e-06	5.92586e-06	2.80601e-06	4.41361e-06	3.12593e-06	6.91883e-06	4.20943e-06	5.91236e-06	3.46985e-06	2.55695e-06	4.84943e-06	3.92424e-06	3.90326e-06	6.93492e-06	5.24151e-06	3.24462e-06	4.21493e-06	1.29905	0.377462	0.0151956	1.13411	up
meta_215	2-Amino-4,6-pteridinediol	7.11842e-07	4.86142e-07	8.68434e-07	6.6562e-07	7.66033e-07	1.4018e-06	1.43835e-06	1.75866e-06	2.44695e-06	2.21201e-06	1.81429e-06	1.10897e-06	7.4963e-07	1.91479e-06	4.31412e-06	6.82585e-07	2.08374e-06	1.34338e-06	1.21402e-06	1.0978e-06	2.21942e-06	2.77288e-06	2.47097e-06	1.55491e-06	3.33159e-06	1.12249e-06	6.342e-07	1.72624e-06	3.86139e-06	3.08494e-06	5.15799e-06	2.07425e-06	1.06785e-06	2.80282e-06	3.18619e-06	2.27767e-06	5.11036e-06	4.86835e-06	1.45396e-06	2.74025e-06	1.88468	0.914323	0.00187746	1.28248	up
meta_216	2-Hydroxyglutaric acid	3.28995e-06	2.73694e-06	2.32825e-06	2.74569e-06	2.08379e-06	2.10493e-06	3.73074e-06	5.67031e-06	3.78357e-06	4.54157e-06	3.19866e-06	4.63063e-06	4.31878e-06	5.55986e-06	3.03686e-06	5.91139e-06	5.63806e-06	2.68505e-06	4.14054e-06	1.48176e-06	2.47453e-06	3.61867e-06	5.0219e-06	4.34091e-06	3.87498e-06	2.72449e-06	5.99357e-06	5.67635e-06	4.53309e-06	5.06651e-06	8.21251e-06	7.16584e-06	6.92467e-06	6.62412e-06	8.65251e-06	3.73869e-06	8.28687e-06	5.78799e-06	3.68087e-06	5.48434e-06	1.48996	0.575273	0.00205644	1.43726	up
meta_217	Iminodiacetic acid	7.87626e-05	0.000112959	0.000160112	0.000193299	0.000187017	0.000164262	0.000169159	0.000213294	0.000228827	0.000218739	0.000227613	0.000231367	0.000247283	0.00020897	0.000258082	0.000282082	0.000194921	0.000141221	0.000193038	0.000241571	0.000170715	0.00018326	0.000164108	0.000212072	0.00018241	0.000109507	0.000209084	0.000211582	0.000141244	0.000131936	0.000149006	0.000168123	0.000171398	0.0001086	7.9475e-05	0.000121829	0.000223938	0.000158612	0.000197629	0.000160939	0.814349	-0.296281	0.0168127	1.33491	down
meta_228	7-ketolithocholic acid	5.41652e-05	2.90114e-05	1.0439e-05	1.26792e-05	0.000193177	1.14902e-05	0.00010446	1.18264e-05	2.43309e-05	6.80445e-06	1.27158e-05	2.20216e-05	4.13288e-05	1.99354e-05	1.14109e-05	0.000127442	4.35513e-06	7.79951e-05	1.35207e-05	1.08266e-05	0.000107459	0.000583068	2.76541e-05	1.50505e-06	1.60813e-05	8.60733e-06	4.84431e-06	6.94969e-05	6.19165e-05	0.000173827	4.8773e-05	5.39841e-05	4.61645e-05	2.007e-05	0.000541775	4.94056e-05	0.000357955	0.000205714	3.99967e-05	0.000132128	3.30346	1.72398	0.0491133	1.03247	up
meta_229	1,6-anhydro-β-D-glucose	3.69005e-06	2.45738e-06	3.29918e-06	2.89941e-06	3.46012e-06	2.50129e-06	2.2865e-06	3.3019e-06	2.02248e-06	2.38649e-06	1.90856e-06	2.67994e-06	3.11102e-06	1.28883e-06	3.30286e-06	2.96694e-06	3.88382e-06	2.50715e-06	2.63005e-06	2.35411e-06	6.7689e-06	6.27859e-06	4.79382e-06	4.88192e-06	3.13445e-06	8.63307e-06	7.05342e-06	3.92255e-06	8.53989e-06	1.05383e-05	2.84315e-06	1.43247e-06	4.89229e-06	4.02947e-06	2.76438e-06	5.40891e-06	6.37014e-06	5.18007e-06	2.7469e-06	5.41477e-06	1.97123	0.979093	0.00015052	1.85151	up
meta_230	16-Hydroxyhexadecanoic acid	0.000732479	0.000499214	0.000436056	0.000629721	0.000507452	0.000610946	0.000723759	0.00064653	0.000824004	0.00102257	0.000530934	0.000870465	0.000475708	0.000895096	0.000696068	0.000806666	0.000988598	0.00071448	0.000726531	0.000478544	0.000619101	0.00120197	0.000931105	0.00113535	0.000590383	0.000780731	0.000667331	0.000859059	0.000882185	0.000868935	0.000915945	0.000964782	0.000896316	0.000982361	0.000747649	0.000724994	0.000964677	0.00103661	0.000690791	0.000876083	1.26823	0.342818	0.00187909	1.41401	up
meta_231	12-ketolithocholic acid	5.41652e-05	2.90114e-05	1.0439e-05	1.26792e-05	0.000193177	1.14902e-05	0.00010446	1.18264e-05	2.43309e-05	6.80445e-06	1.27158e-05	2.20216e-05	4.13288e-05	1.99354e-05	1.14109e-05	0.000127442	4.35513e-06	7.79951e-05	1.35207e-05	1.08266e-05	0.000107459	0.000583068	2.76541e-05	1.50505e-06	1.60813e-05	8.60733e-06	4.84431e-06	6.94969e-05	6.19165e-05	0.000173827	4.8773e-05	5.39841e-05	4.61645e-05	2.007e-05	0.000541775	4.94056e-05	0.000357955	0.000205714	3.99967e-05	0.000132128	3.30346	1.72398	0.0491133	1.03247	up
meta_233	N,N′-dicyclohexylcarbodiimide	0.00142732	0.00135422	0.00136707	0.00158742	0.00182941	0.0014856	0.00133983	0.00178645	0.0012824	0.00142925	0.00182035	0.00157661	0.00207919	0.00168029	0.00180227	0.00137026	0.00165285	0.00140604	0.00159156	0.00197611	0.00139814	0.00149608	0.00143471	0.00111414	0.00148787	0.00112422	0.00133566	0.00139443	0.00157584	0.00128884	0.00139426	0.00124417	0.00142644	0.00134856	0.00138377	0.00115622	0.00169391	0.00137564	0.00159222	0.00137072	0.860881	-0.216115	0.00117361	1.56654	down
meta_235	Erythrose	2.35045e-06	1.43241e-06	2.35992e-06	3.43684e-06	1.06331e-06	1.08103e-06	4.44775e-06	2.71979e-06	2.06341e-06	4.70134e-06	4.37928e-06	4.8346e-06	2.78158e-06	1.10691e-06	3.85604e-06	3.17818e-06	4.25711e-06	3.71156e-06	2.8497e-06	2.76233e-06	3.73038e-06	6.83257e-06	1.9314e-06	3.76658e-06	3.71134e-06	2.38255e-06	4.3547e-06	1.6959e-06	4.51447e-06	4.41727e-06	8.65846e-06	2.78366e-06	4.46835e-06	2.72287e-06	5.52371e-06	5.32079e-06	5.18157e-06	8.22929e-06	2.96868e-06	4.45699e-06	1.50134	0.586251	0.00998317	1.19243	up
meta_237	DL-2-hydroxystearic acid	1.78575e-05	1.37725e-05	1.0891e-05	1.79315e-05	1.41117e-05	1.51285e-05	2.75302e-05	1.85799e-05	2.34423e-05	2.91928e-05	1.65653e-05	2.03131e-05	1.3832e-05	2.24161e-05	1.93835e-05	2.57247e-05	3.41872e-05	2.35993e-05	2.20102e-05	1.53862e-05	1.81959e-05	3.96298e-05	2.46918e-05	3.67649e-05	1.99068e-05	1.9369e-05	2.1923e-05	3.04072e-05	3.07594e-05	2.63452e-05	3.28841e-05	2.89296e-05	2.78787e-05	2.38758e-05	2.29917e-05	2.07368e-05	2.20459e-05	3.08239e-05	2.00928e-05	2.65644e-05	1.32209	0.402818	0.00223841	1.31123	up
meta_238	Apocholic acid	5.41652e-05	2.90114e-05	1.0439e-05	1.26792e-05	0.000193177	1.14902e-05	0.00010446	1.18264e-05	2.43309e-05	6.80445e-06	1.27158e-05	2.20216e-05	4.13288e-05	1.99354e-05	1.14109e-05	0.000127442	4.35513e-06	7.79951e-05	1.35207e-05	1.08266e-05	0.000107459	0.000583068	2.76541e-05	1.50505e-06	1.60813e-05	8.60733e-06	4.84431e-06	6.94969e-05	6.19165e-05	0.000173827	4.8773e-05	5.39841e-05	4.61645e-05	2.007e-05	0.000541775	4.94056e-05	0.000357955	0.000205714	3.99967e-05	0.000132128	3.30346	1.72398	0.0491133	1.03247	up
meta_239	2-hydroxyhexadecanoic acid	0.000732479	0.000499214	0.000436056	0.000629721	0.000507452	0.000610946	0.000723759	0.00064653	0.000824004	0.00102257	0.000530934	0.000870465	0.000475708	0.000895096	0.000696068	0.000806666	0.000988598	0.00071448	0.000726531	0.000478544	0.000619101	0.00120197	0.000931105	0.00113535	0.000590383	0.000780731	0.000667331	0.000859059	0.000882185	0.000868935	0.000915945	0.000964782	0.000896316	0.000982361	0.000747649	0.000724994	0.000964677	0.00103661	0.000690791	0.000876083	1.26823	0.342818	0.00187909	1.41401	up
meta_246	D-Mannose 6-phosphate	7.02178e-06	1.01181e-05	3.54479e-06	1.08046e-05	4.59012e-06	3.77695e-06	7.37476e-06	5.41589e-06	6.80627e-06	2.73737e-06	9.05134e-06	8.18835e-06	7.13294e-06	1.81229e-06	6.51011e-06	7.74505e-06	1.06173e-05	4.24737e-06	4.82234e-06	3.19605e-06	8.39075e-06	1.22363e-05	9.8241e-06	5.59212e-06	8.12076e-06	1.56732e-05	1.4398e-05	9.46091e-06	2.34698e-05	3.03786e-05	1.04604e-05	7.94492e-06	1.10538e-05	8.9586e-06	9.33947e-06	8.93002e-06	2.21048e-05	2.05213e-05	6.27569e-06	1.31588e-05	2.09678	1.06818	0.000513482	1.75383	up
meta_249	L-2-amino-6-oximelic acid	1.65851e-06	2.31593e-06	1.69308e-06	1.3512e-06	4.06036e-06	2.2393e-06	2.78145e-06	2.47279e-06	2.01678e-06	2.73586e-06	1.99301e-06	2.04525e-06	1.46415e-06	2.63849e-06	3.2332e-06	2.485e-06	2.09252e-06	4.43576e-06	3.51736e-06	2.19063e-06	2.51608e-06	3.89643e-06	2.90349e-06	1.81122e-06	2.29301e-06	2.77596e-06	3.70799e-06	3.10141e-06	3.64213e-06	4.07078e-06	4.12815e-06	2.91475e-06	1.83549e-06	3.0938e-06	4.10588e-06	2.13812e-06	6.251e-06	5.92351e-06	2.47103e-06	3.39496e-06	1.3739	0.458279	0.0118661	1.2963	up
meta_250	3-(pyrazol-1-yl) -L-alanine	0.000172043	0.000116934	0.00012552	0.000141612	0.000179951	0.000138314	0.000164194	0.000154573	0.00016677	0.000215687	0.000208073	0.000253967	0.000156854	0.000166701	0.000253216	0.000202283	0.000220393	0.000140722	0.000138646	0.00019835	0.000146156	0.000157732	0.000136924	0.000145878	0.000159505	0.000102019	0.000181963	0.000156511	0.000198218	0.000125696	0.00014471	0.000136256	0.000150341	0.000149919	0.000149981	0.000165697	0.00014144	0.000214686	0.00017574	0.000153535	0.873648	-0.194875	0.0472472	1.05892	down
meta_252	LPS(16:2/0:0)	6.8988e-07	5.35649e-07	8.37816e-07	4.74517e-07	4.00412e-07	5.58591e-07	4.7196e-07	4.5034e-07	4.80866e-07	4.91088e-07	6.54135e-07	4.92512e-07	2.56578e-07	3.58903e-07	1.66094e-07	5.36202e-07	4.45194e-07	6.37249e-07	1.1022e-06	4.61456e-07	9.54227e-07	6.90731e-07	5.0862e-07	7.72135e-07	7.17067e-07	7.79514e-07	5.92216e-07	4.27403e-07	9.15916e-07	1.03472e-06	6.56886e-07	1.2559e-06	4.33555e-07	8.70624e-07	6.41704e-07	1.07443e-06	7.1591e-07	7.30778e-07	5.25082e-07	7.6513e-07	1.45716	0.543161	0.00134355	1.67485	up
meta_253	LPE(0:0/22:4)	9.59551e-05	0.000118744	0.000101217	4.92451e-05	1.78439e-05	8.62322e-05	8.63873e-05	2.18268e-05	8.42786e-05	5.20745e-05	4.2279e-05	4.29987e-05	3.9811e-05	5.48022e-05	4.80037e-05	3.46621e-05	2.95836e-05	6.39294e-05	4.70829e-05	8.48353e-05	5.41206e-05	9.9824e-05	8.34899e-05	0.000109799	6.70256e-05	0.000127432	4.25116e-05	5.53255e-05	7.33809e-05	0.000110296	8.73505e-05	0.000204121	2.33774e-05	7.3453e-05	3.54443e-05	0.000225955	6.83632e-05	0.000171338	6.00896e-05	9.51448e-05	1.58338	0.663009	0.0251019	1.31135	up
meta_254	LPE(22:4/0:0)	9.59551e-05	0.000118744	0.000101217	4.92451e-05	1.78439e-05	8.62322e-05	8.63873e-05	2.18268e-05	8.42786e-05	5.20745e-05	4.2279e-05	4.29987e-05	3.9811e-05	5.48022e-05	4.80037e-05	3.46621e-05	2.95836e-05	6.39294e-05	4.70829e-05	8.48353e-05	5.41206e-05	9.9824e-05	8.34899e-05	0.000109799	6.70256e-05	0.000127432	4.25116e-05	5.53255e-05	7.33809e-05	0.000110296	8.73505e-05	0.000204121	2.33774e-05	7.3453e-05	3.54443e-05	0.000225955	6.83632e-05	0.000171338	6.00896e-05	9.51448e-05	1.58338	0.663009	0.0251019	1.31135	up
meta_257	LPE(0:0/22:6)	0.0024949	0.00168202	0.00174812	0.00139345	0.00100566	0.00183979	0.00124831	0.000835267	0.00166912	0.00184503	0.00094361	0.00151877	0.000772187	0.00194325	0.00102702	0.00133375	0.00174181	0.0016141	0.00105845	0.000548202	0.00164218	0.00194451	0.00129815	0.00224956	0.00120962	0.00303942	0.00195293	0.00192671	0.00309114	0.00233153	0.0016626	0.00294204	0.00168726	0.00143606	0.00167477	0.00227846	0.00122232	0.00268232	0.00141314	0.00201509	1.42596	0.511938	0.00210965	1.58061	up
meta_258	LPE(22:6/0:0)	0.0024949	0.00168202	0.00174812	0.00139345	0.00100566	0.00183979	0.00124831	0.000835267	0.00166912	0.00184503	0.00094361	0.00151877	0.000772187	0.00194325	0.00102702	0.00133375	0.00174181	0.0016141	0.00105845	0.000548202	0.00164218	0.00194451	0.00129815	0.00224956	0.00120962	0.00303942	0.00195293	0.00192671	0.00309114	0.00233153	0.0016626	0.00294204	0.00168726	0.00143606	0.00167477	0.00227846	0.00122232	0.00268232	0.00141314	0.00201509	1.42596	0.511938	0.00210965	1.58061	up
meta_261	LPE(0:0/20:3)	0.00203934	0.00164014	0.00146297	0.00061961	0.000242534	0.00130381	0.000775062	0.000345272	0.00115715	0.000652987	0.000437175	0.00085948	0.000314379	0.000798228	0.000546436	0.000726757	0.00132432	0.00100181	0.000720476	0.000755834	0.00132532	0.00091357	0.00123583	0.00156478	0.0014226	0.00230914	0.000838136	0.000962591	0.00174735	0.00172405	0.00125824	0.00311311	0.00115774	0.00129695	0.00111814	0.0026391	0.0010578	0.00201134	0.000886189	0.00153865	1.73626	0.795984	0.00108223	1.73228	up
meta_262	LPE(20:3/0:0)	0.00203934	0.00164014	0.00146297	0.00061961	0.000242534	0.00130381	0.000775062	0.000345272	0.00115715	0.000652987	0.000437175	0.00085948	0.000314379	0.000798228	0.000546436	0.000726757	0.00132432	0.00100181	0.000720476	0.000755834	0.00132532	0.00091357	0.00123583	0.00156478	0.0014226	0.00230914	0.000838136	0.000962591	0.00174735	0.00172405	0.00125824	0.00311311	0.00115774	0.00129695	0.00111814	0.0026391	0.0010578	0.00201134	0.000886189	0.00153865	1.73626	0.795984	0.00108223	1.73228	up
meta_266	LPE(0:0/18:0)	0.00358605	0.00122908	0.00162836	0.000907294	0.000489493	0.00155644	0.00104815	0.000673204	0.0012686	0.00104597	0.000635265	0.000800776	0.000615247	0.000797756	0.000697485	0.00144975	0.00134275	0.0012242	0.00123641	0.00118162	0.00196084	0.00102104	0.00190076	0.0013118	0.00204274	0.00254458	0.00122798	0.00119454	0.00170428	0.00272411	0.00156954	0.00397707	0.00197162	0.00125475	0.00130266	0.00340274	0.00133334	0.00205313	0.0011707	0.00191653	1.63709	0.71113	0.00389064	1.5761	up
meta_270	LPE(0:0/16:0)	0.0170852	0.00918081	0.00732799	0.0048173	0.00326647	0.00825899	0.00447527	0.00291419	0.00623272	0.00611162	0.00279443	0.00565168	0.00271948	0.00537432	0.00448007	0.00677981	0.00604029	0.00595507	0.00558465	0.00715516	0.00986363	0.00632721	0.0115412	0.00825989	0.00972382	0.0133936	0.00810584	0.0075342	0.0127248	0.0130849	0.0109012	0.0194831	0.00913771	0.00744617	0.00891614	0.02085	0.00792478	0.0131006	0.00611028	0.0110177	1.80314	0.850515	0.000201189	1.88898	up
meta_271	LPE(0:0/16:1)	0.000262758	0.000276201	0.000273883	9.21034e-05	4.32037e-05	0.000198505	7.90508e-05	4.49218e-05	0.0001973	0.000132311	5.41964e-05	0.000184443	4.54761e-05	0.000112232	8.84115e-05	0.00013256	0.000114989	0.000128029	6.10958e-05	0.000160899	0.000205552	6.2084e-05	0.00031728	0.000179567	0.000159185	0.000271688	0.00011138	0.000115843	0.00034838	0.000208896	0.000246432	0.000578448	0.000106035	0.000103522	0.000109388	0.000311935	7.66786e-05	0.000198431	0.000134129	0.000206151	1.53697	0.620088	0.0466408	1.16985	up
meta_272	Glycine linoleate	1.40744e-05	3.80027e-06	6.30851e-06	7.28482e-06	6.49039e-06	1.01055e-05	1.11173e-05	5.84718e-06	8.69003e-06	8.32513e-06	6.30617e-06	1.07183e-05	1.039e-05	1.33753e-05	7.18502e-06	8.84367e-06	1.00333e-05	8.35092e-06	9.38014e-06	4.44671e-06	1.36919e-05	2.69255e-05	5.06422e-06	1.13521e-05	7.2039e-06	1.46209e-05	8.5282e-06	6.74798e-06	9.66924e-06	1.72578e-05	7.51676e-06	1.11744e-05	1.27796e-05	9.49872e-06	6.18242e-06	9.24682e-06	2.44644e-05	1.78033e-05	8.55366e-06	1.22071e-05	1.42712	0.513109	0.0283469	1.18755	up
meta_284	8-Aminooctanoic Acid	3.37556e-05	2.8865e-05	3.35049e-05	4.83118e-05	3.52873e-05	3.80707e-05	3.39274e-05	4.24961e-05	4.59585e-05	4.24719e-05	4.74063e-05	4.53711e-05	4.24749e-05	3.21737e-05	4.5733e-05	4.68075e-05	3.87489e-05	3.92342e-05	3.39915e-05	3.52085e-05	3.42008e-05	2.98514e-05	3.95143e-05	3.16485e-05	4.20627e-05	3.16317e-05	3.55714e-05	4.35064e-05	3.33129e-05	3.48024e-05	3.6133e-05	3.60513e-05	3.3163e-05	3.40952e-05	3.69328e-05	3.21393e-05	3.53628e-05	3.11267e-05	3.94899e-05	3.50615e-05	0.887858	-0.171599	0.00874607	1.54751	down
meta_286	Tridecanedioic acid	0.000122908	0.000106041	0.000102319	0.000101228	0.000134678	9.74402e-05	0.000103033	0.00011586	0.000103712	9.50098e-05	0.000115448	0.000107324	0.00015065	0.000124167	0.000132072	0.000111411	0.000113524	0.000103546	0.000105992	0.000150844	0.000139711	0.0001308	0.000130264	0.000136881	0.000130298	0.000143115	0.000159364	0.000131593	0.000122256	0.00012088	0.000140497	0.000120191	0.000130685	0.000127467	0.000123616	0.000119779	0.000124743	0.000137376	0.00011486	0.00013164	1.14608	0.196714	0.000528424	1.38716	up
meta_287	12-Hydroxyoctadecanoic acid	5.74954e-06	3.07781e-06	6.92653e-06	6.87367e-06	3.77168e-06	5.90368e-06	8.24845e-06	4.86078e-06	6.96585e-06	8.0001e-06	4.34573e-06	9.86703e-06	3.95293e-06	1.09668e-05	9.30554e-06	6.11723e-06	8.44053e-06	3.39915e-06	6.12289e-06	2.81402e-06	8.99758e-06	3.22599e-05	1.40613e-05	1.77963e-05	6.74567e-06	8.90147e-06	1.38819e-05	1.0012e-05	9.21679e-06	9.44683e-06	5.1934e-06	8.58119e-06	8.62842e-06	8.31031e-06	9.69632e-06	8.20183e-06	8.82754e-06	2.19691e-05	6.2855e-06	1.17071e-05	1.86256	0.897286	0.00319626	1.42332	up
meta_288	N-Palmitoylglycine	1.93681e-05	7.22112e-06	8.71352e-06	1.23143e-05	1.05671e-05	7.429e-06	1.48093e-05	1.02888e-05	1.67663e-05	1.86222e-05	1.07735e-05	1.85762e-05	1.0816e-05	2.09354e-05	1.13766e-05	1.11395e-05	1.66474e-05	1.15347e-05	9.19126e-06	7.98938e-06	1.17425e-05	1.93827e-05	1.33806e-05	2.89916e-05	1.19203e-05	2.12251e-05	2.20807e-05	1.27254e-05	1.63702e-05	1.55217e-05	1.65244e-05	1.95262e-05	1.2193e-05	1.30599e-05	1.78628e-05	1.19065e-05	2.37208e-05	2.26336e-05	1.2754e-05	1.72649e-05	1.35369	0.436895	0.00557451	1.28745	up
meta_297	20-COOH-AA	5.85236e-06	7.6472e-06	2.80521e-06	7.90384e-06	6.26638e-06	5.74379e-06	4.7682e-06	5.88461e-06	9.347e-06	7.15836e-06	7.38139e-06	7.18498e-06	3.28005e-06	1.40855e-05	4.10804e-06	6.31886e-06	9.49903e-06	6.9842e-06	8.58429e-06	6.46378e-06	1.33214e-05	8.70273e-06	2.96656e-06	1.06759e-05	8.05081e-06	1.39426e-05	7.39307e-06	9.66263e-06	8.76827e-06	9.04906e-06	9.83242e-06	6.6263e-06	1.23074e-05	1.09451e-05	8.63321e-06	9.26676e-06	1.31689e-05	1.87719e-05	6.86335e-06	1.01158e-05	1.47389	0.55963	0.00224912	1.45665	up
meta_300	10-HDoHE	4.08147e-07	4.042e-07	1.0179e-06	1.40013e-06	9.52967e-07	8.4031e-07	1.38293e-06	7.96796e-07	2.44112e-06	1.65625e-06	1.7616e-06	1.68887e-06	1.09197e-06	2.51608e-06	4.84971e-07	1.82702e-06	1.85714e-06	4.26192e-07	2.13561e-06	1.44832e-06	1.69094e-06	4.33772e-06	1.67227e-06	5.7365e-06	1.75523e-06	5.50172e-07	5.02001e-06	4.50207e-06	2.04995e-06	1.23255e-06	1.19757e-06	1.0685e-06	1.30837e-06	1.14318e-06	2.26814e-06	1.4574e-06	2.10393e-06	3.02908e-06	1.32693e-06	2.3402e-06	1.76363	0.818544	0.0161943	1.04849	up
meta_303	16-HDoHE	1.86385e-07	4.89287e-07	8.15054e-07	1.19518e-06	5.33621e-07	5.85349e-07	8.12701e-07	4.01478e-07	1.93608e-06	1.25927e-06	1.21575e-06	1.64525e-06	1.26392e-06	1.87806e-06	6.02078e-07	1.82756e-06	1.25793e-06	6.03937e-07	1.44203e-06	5.51626e-07	1.6517e-06	2.89298e-06	1.17422e-06	4.57069e-06	1.28181e-06	4.29929e-07	4.01654e-06	3.6341e-06	1.85666e-06	1.01438e-06	9.4934e-07	1.0257e-06	9.27942e-07	9.49179e-07	1.92617e-06	9.48638e-07	1.58052e-06	2.03711e-06	1.02513e-06	1.82598e-06	1.78122	0.832866	0.0149343	1.03145	up
meta_304	20-HDoHE	4.3461e-08	2.35738e-07	1.79901e-07	2.04966e-07	1.86559e-07	3.12793e-07	1.85142e-07	1.22649e-07	6.18466e-07	3.85039e-07	3.97652e-07	4.4361e-07	3.68749e-07	2.72167e-07	1.27197e-08	5.87199e-07	4.14016e-07	2.46179e-07	5.42598e-07	6.24574e-08	6.90462e-07	8.89433e-07	4.30757e-07	1.1176e-06	6.40023e-07	2.67771e-07	1.06161e-06	9.29591e-07	6.7662e-07	4.05892e-07	3.60657e-07	3.49391e-07	5.73114e-07	3.41782e-07	6.34022e-07	4.65207e-07	1.22481e-06	4.7581e-07	2.91103e-07	6.40808e-07	2.20131	1.13836	0.000144681	1.60217	up
meta_309	Sorbitol 6-phosphate	7.575e-06	5.51272e-06	6.39398e-06	5.99769e-06	6.46846e-06	6.73195e-06	9.89078e-06	8.97047e-06	1.00391e-05	8.75123e-06	1.25358e-05	1.18529e-05	1.13873e-05	1.02701e-05	1.495e-05	1.0571e-05	1.06718e-05	7.30369e-06	9.78159e-06	8.82696e-06	8.32321e-06	1.09657e-05	7.9526e-06	9.79481e-06	9.35462e-06	5.80385e-06	8.21399e-06	6.31309e-06	4.36184e-06	5.25446e-06	1.23278e-05	9.2007e-06	5.86023e-06	4.74274e-06	2.8774e-06	6.01647e-06	6.85426e-06	6.71138e-06	9.22412e-06	7.27384e-06	0.788567	-0.342695	0.0192941	1.35074	down
meta_310	Glu-Gln	0.000139691	0.00013106	1.91255e-05	7.92702e-05	0.000113731	5.1702e-05	4.42024e-05	6.3925e-05	3.98317e-05	5.41658e-05	6.6636e-05	7.17959e-05	8.0264e-05	8.67472e-05	8.07045e-05	3.35368e-05	7.37825e-05	8.49224e-05	3.36243e-05	5.18727e-05	4.03334e-05	2.60404e-05	2.85637e-05	1.94067e-05	4.57987e-05	5.50882e-05	3.54062e-05	2.0798e-05	3.92725e-05	2.36057e-05	2.96311e-05	2.79515e-05	2.29347e-05	4.25089e-05	1.3873e-05	4.32326e-05	1.87646e-05	1.67371e-05	7.00296e-05	3.05526e-05	0.436281	-1.19667	2.40211e-05	1.82828	down
meta_311	N-Arachidonoyl-L-Alanine	5.47109e-07	2.96882e-07	3.91098e-07	2.38288e-07	2.28794e-07	2.53126e-07	7.78547e-07	2.30144e-07	5.25619e-07	3.96286e-07	2.48087e-07	3.86046e-07	2.81243e-07	4.8742e-07	3.94192e-07	2.76273e-07	4.34472e-07	5.16624e-07	1.49525e-07	2.80026e-07	2.11406e-07	1.06185e-06	3.77103e-07	6.57307e-07	5.94241e-07	3.02979e-07	5.58177e-07	5.28289e-07	5.10233e-07	6.5087e-07	3.01431e-07	5.00061e-07	4.18865e-07	3.03377e-07	3.66679e-07	6.32467e-07	6.47436e-07	1.6378e-06	3.6699e-07	5.70032e-07	1.55326	0.635301	0.025295	1.20417	up
meta_313	Glycerophospho-N-Arachidonoyl Ethanolamine	0.00305563	0.00174564	0.0016722	0.00121643	0.000783148	0.00151758	0.0011112	0.000916582	0.00132509	0.00137508	0.000973755	0.00105314	0.000743651	0.00114881	0.000897244	0.00105598	0.00165163	0.00150883	0.00118088	0.000904483	0.0011438	0.00177762	0.00135944	0.00160143	0.00167194	0.00231282	0.00116631	0.00126141	0.00192392	0.00205139	0.0014165	0.00258231	0.00128865	0.00125202	0.00118311	0.00224856	0.00139098	0.00177921	0.00129185	0.00163397	1.26483	0.338941	0.0332415	1.2539	up
meta_314	FFA(16:2)	1.07946e-06	8.93879e-07	9.12424e-07	1.34144e-06	1.03567e-06	1.0607e-06	6.0893e-07	8.12573e-07	7.65884e-07	9.26422e-07	1.0039e-06	8.67902e-07	1.05303e-06	1.34713e-06	1.13356e-06	9.00305e-07	1.18054e-06	8.05253e-07	1.16577e-06	1.23904e-06	6.37266e-07	1.04527e-06	7.23277e-07	5.27941e-07	1.36227e-06	9.188e-07	9.74604e-07	7.9889e-07	7.87895e-07	6.94725e-07	7.78482e-07	7.51061e-07	8.16699e-07	9.89069e-07	1.0475e-06	8.38181e-07	9.15649e-07	6.42431e-07	1.00669e-06	8.47222e-07	0.841591	-0.248808	0.0159984	1.17773	down
meta_320	3-(4-Hydroxyphenyl)-1-propanol	1.38375e-07	9.12371e-08	1.37684e-07	5.49122e-07	1.06308e-07	2.6454e-07	3.14867e-07	1.77318e-07	3.15716e-07	4.54432e-07	2.06076e-07	4.37061e-07	1.4966e-07	4.30786e-08	1.85008e-07	4.25514e-07	3.56528e-07	4.1889e-07	5.93484e-07	1.57644e-07	1.75951e-07	2.6004e-07	1.61896e-07	4.35325e-07	5.997e-07	2.88361e-07	3.22939e-07	3.66126e-07	4.72955e-07	3.72552e-07	4.66935e-07	3.30118e-07	3.1577e-07	4.76935e-07	7.76838e-07	3.99093e-07	3.28525e-07	7.92684e-07	2.76127e-07	4.0793e-07	1.47733	0.56299	0.0212562	1.14349	up
meta_324	Acetylvaline	5.37224e-06	3.45665e-06	3.04847e-06	5.42656e-06	3.48355e-06	3.24122e-06	3.42248e-06	3.94055e-06	5.92664e-06	6.15891e-06	4.893e-06	3.97241e-06	4.01138e-06	4.58779e-06	5.61461e-06	5.43365e-06	5.74582e-06	5.45676e-06	3.92131e-06	2.06642e-06	5.30206e-06	5.21912e-06	4.516e-06	6.22531e-06	6.7426e-06	4.92979e-06	5.93585e-06	4.619e-06	6.33921e-06	5.02178e-06	7.64331e-06	4.87347e-06	4.57789e-06	5.70205e-06	6.4299e-06	5.17286e-06	8.02105e-06	7.66255e-06	4.45902e-06	5.82966e-06	1.30739	0.386684	0.000684395	1.36006	up
meta_326	D-Galacturonic Acid	8.65248e-06	1.07254e-05	6.14091e-06	7.45334e-06	6.56013e-06	7.14307e-06	1.03937e-05	7.97286e-06	5.09052e-06	1.39928e-05	5.08775e-06	1.0351e-05	7.08407e-06	4.43971e-06	3.09491e-06	7.37699e-06	1.16711e-05	8.76532e-06	4.30212e-06	6.45237e-06	1.89896e-05	1.77554e-05	1.62624e-05	1.52393e-05	1.02097e-05	1.98254e-05	1.48323e-05	1.1816e-05	1.95989e-05	2.76464e-05	1.15168e-05	8.07625e-06	1.40012e-05	1.35067e-05	1.33318e-05	1.35489e-05	2.85126e-05	2.22745e-05	7.63752e-06	1.64969e-05	2.15998	1.11102	2.44231e-06	2.17402	up
meta_327	D-Tagatose	1.3106e-05	1.26476e-05	9.46429e-06	1.73657e-05	1.41728e-05	1.24211e-05	1.00845e-05	1.46942e-05	8.24444e-06	1.29152e-05	1.08894e-05	1.27719e-05	1.32076e-05	1.08998e-05	9.7778e-06	1.04827e-05	1.06066e-05	1.41142e-05	1.02529e-05	1.36156e-05	2.1048e-05	2.34732e-05	2.3965e-05	1.37461e-05	1.17388e-05	2.90795e-05	2.32932e-05	1.4982e-05	2.26832e-05	3.29476e-05	1.2963e-05	1.03242e-05	1.69139e-05	1.50042e-05	1.33053e-05	1.69571e-05	2.48177e-05	1.89934e-05	1.20867e-05	1.92353e-05	1.59144	0.670333	0.000171801	1.82291	up
meta_332	Pro-Gly	1.52656e-05	9.99067e-06	1.12171e-05	1.35363e-05	1.15085e-05	8.50377e-06	7.33729e-06	1.06732e-05	6.91858e-06	7.49508e-06	1.17803e-05	1.07237e-05	1.5914e-05	6.54903e-06	8.87956e-06	9.24273e-06	6.29853e-06	5.74269e-06	7.96693e-06	1.16064e-05	7.70854e-06	8.76513e-06	8.94956e-06	8.08836e-06	7.81763e-06	5.73767e-06	6.85511e-06	1.00443e-05	8.90671e-06	5.36815e-06	7.48642e-06	8.01471e-06	7.18895e-06	8.33729e-06	5.86858e-06	8.40684e-06	3.79387e-06	5.07783e-06	9.8575e-06	7.35643e-06	0.746277	-0.422217	0.0023359	1.36627	down
meta_334	Phosphonoacetic acid	1.31986e-06	7.91459e-07	1.68603e-06	6.24352e-07	1.31909e-06	8.06798e-07	6.53761e-07	8.24228e-07	1.65889e-06	1.92478e-06	8.06302e-07	1.18537e-06	2.31606e-06	8.92721e-07	6.69809e-07	9.35404e-07	1.50831e-06	2.61504e-06	1.80704e-06	3.34041e-06	2.1165e-06	2.55581e-06	9.30899e-07	4.17258e-06	1.67033e-06	1.79401e-06	2.18189e-06	9.45274e-07	3.52256e-06	2.0656e-06	2.90409e-06	2.62612e-06	1.57945e-06	1.40178e-06	1.85591e-06	3.93067e-06	1.13778e-06	2.85001e-06	1.38429e-06	2.23563e-06	1.615	0.691537	0.00476169	1.39246	up
meta_338	Phosphatidylethanolamine lyso alkenyl 16:0	2.80174e-05	1.76318e-05	2.69182e-05	1.836e-05	1.19586e-05	1.94017e-05	2.59372e-05	1.36599e-05	2.29799e-05	2.27883e-05	1.74016e-05	1.61963e-05	1.6539e-05	1.91759e-05	1.36366e-05	2.20171e-05	2.6482e-05	2.56221e-05	2.84554e-05	2.36788e-05	2.80464e-05	2.95641e-05	2.53499e-05	2.94717e-05	2.89325e-05	2.79283e-05	2.76716e-05	3.36893e-05	3.36271e-05	4.35067e-05	3.23145e-05	4.14539e-05	3.11224e-05	4.04135e-05	3.45487e-05	4.30944e-05	3.00697e-05	3.60934e-05	2.08429e-05	3.3161e-05	1.591	0.669933	3.94889e-08	2.34354	up
meta_339	LPA(16:0/0:0)	0.000247239	0.000292621	0.000371945	0.000276185	0.00018834	0.000354852	0.000422923	0.00026154	0.000381388	0.000334317	0.000185243	0.000257758	0.000187556	0.00028522	0.00018284	0.000305157	0.000311343	0.000332731	0.000381281	0.000289426	0.000424047	0.000350415	0.000579366	0.000416037	0.000407026	0.000516384	0.000361159	0.000397935	0.000499833	0.000579842	0.00032228	0.000886419	0.000546181	0.000731028	0.000412632	0.000665778	0.000349341	0.000722194	0.000292495	0.000509328	1.74132	0.800181	2.04761e-05	2.11315	up
meta_341	3-hydroxy-tetradecanoic acid	3.34187e-05	1.0711e-05	2.78779e-05	2.6493e-05	3.12832e-05	1.81212e-05	4.20329e-05	1.24753e-05	6.1401e-05	1.84985e-05	1.26336e-05	5.28675e-05	2.16198e-05	5.68256e-05	1.49285e-05	1.68767e-05	2.38551e-05	2.85601e-05	1.88964e-05	1.30833e-05	3.35975e-05	7.08941e-05	4.70863e-05	8.17141e-05	2.68263e-05	4.60484e-05	7.47534e-05	4.82847e-05	6.10843e-05	5.05959e-05	2.71536e-05	3.38246e-05	3.14255e-05	5.22691e-05	4.50512e-05	3.64253e-05	5.02463e-05	8.29311e-05	2.7123e-05	5.00118e-05	1.84389	0.882753	0.000173104	1.67322	up
meta_343	N-Acetyl-5-aminosalicylic acid	1.01445e-06	3.64259e-07	4.66715e-07	5.22876e-07	8.78583e-07	8.51151e-07	2.46834e-07	7.96354e-07	1.39348e-06	1.12067e-06	7.53425e-07	8.80446e-07	4.44393e-07	1.3666e-06	1.8762e-06	5.10825e-07	4.13664e-07	9.92726e-07	2.7369e-07	4.05612e-07	6.94038e-07	5.35417e-07	1.11404e-06	1.77309e-07	1.3062e-06	6.8478e-07	1.2016e-06	1.29828e-06	1.17126e-06	1.52807e-06	2.0078e-06	6.90726e-07	1.13388e-06	1.5175e-06	1.07796e-06	7.82669e-07	2.68624e-06	2.40802e-06	7.78648e-07	1.2231e-06	1.5708	0.651498	0.0191582	1.01752	up
meta_345	LPA(18:1/0:0)	1.89136e-05	8.77893e-06	1.82736e-05	8.47268e-06	5.2796e-06	1.14192e-05	1.23806e-05	9.6347e-06	1.00423e-05	9.77968e-06	8.66282e-06	8.01585e-06	5.14268e-06	7.98081e-06	7.04485e-06	9.50923e-06	1.21545e-05	1.14392e-05	1.62745e-05	9.76944e-06	1.47533e-05	1.44643e-05	1.35807e-05	1.13987e-05	1.26288e-05	1.88593e-05	1.20816e-05	1.17514e-05	1.41688e-05	2.08809e-05	1.77831e-05	1.99093e-05	1.4053e-05	1.49362e-05	1.76496e-05	1.57123e-05	1.11635e-05	1.3605e-05	1.04484e-05	1.49655e-05	1.43232	0.518356	0.000195676	1.89556	up
meta_346	D-Allose	1.3106e-05	1.26476e-05	9.46429e-06	1.73657e-05	1.41728e-05	1.24211e-05	1.00845e-05	1.46942e-05	8.24444e-06	1.29152e-05	1.08894e-05	1.27719e-05	1.32076e-05	1.08998e-05	9.7778e-06	1.04827e-05	1.06066e-05	1.41142e-05	1.02529e-05	1.36156e-05	2.1048e-05	2.34732e-05	2.3965e-05	1.37461e-05	1.17388e-05	2.90795e-05	2.32932e-05	1.4982e-05	2.26832e-05	3.29476e-05	1.2963e-05	1.03242e-05	1.69139e-05	1.50042e-05	1.33053e-05	1.69571e-05	2.48177e-05	1.89934e-05	1.20867e-05	1.92353e-05	1.59144	0.670333	0.000171801	1.82291	up
meta_347	Hydroxypiperazic acid	6.4125e-05	5.68518e-05	2.58519e-05	5.04301e-05	6.47484e-05	3.67026e-05	3.19937e-05	5.14268e-05	4.53484e-05	5.00877e-05	6.96423e-05	5.70174e-05	6.21475e-05	5.44039e-05	6.83365e-05	5.3436e-05	5.74217e-05	5.99794e-05	5.44566e-05	6.52102e-05	3.70362e-05	3.57226e-05	3.00819e-05	2.90916e-05	4.36698e-05	2.85216e-05	3.87685e-05	2.78124e-05	3.88938e-05	2.97026e-05	5.36113e-05	4.31011e-05	3.31271e-05	5.89166e-05	3.6707e-05	4.79637e-05	2.75403e-05	3.12493e-05	5.39809e-05	3.73065e-05	0.691106	-0.533021	2.04359e-05	1.8839	down
meta_353	Leu-Ile	4.86079e-06	5.71823e-06	2.13409e-06	1.45799e-05	6.93355e-06	1.97373e-05	5.81758e-06	1.60531e-05	1.39892e-05	1.5464e-05	9.5829e-06	5.1817e-06	1.27919e-05	1.16192e-05	5.56509e-06	6.30166e-06	1.50696e-05	7.5516e-06	3.00421e-06	2.40245e-05	8.41044e-06	4.64837e-06	1.60605e-05	1.14065e-05	4.67771e-06	4.50494e-06	2.88439e-06	9.59918e-06	6.04129e-06	2.1196e-06	2.08288e-06	5.17431e-06	4.83792e-06	3.42029e-06	1.62015e-06	2.38119e-06	3.97081e-06	3.30476e-06	1.0299e-05	5.39695e-06	0.524027	-0.932288	0.00438814	1.37782	down
meta_354	Docodiendioicacid	7.28008e-05	6.67837e-05	2.09523e-05	6.93757e-05	6.49471e-05	5.62563e-05	4.67532e-05	5.80075e-05	7.23087e-05	9.3925e-05	8.36497e-05	7.16235e-05	5.75116e-05	9.4089e-05	4.49407e-05	3.1488e-05	7.1768e-05	6.02914e-05	5.96352e-05	5.85112e-05	7.566e-05	0.000134556	3.43756e-05	7.80502e-05	6.31988e-05	5.85596e-05	4.18689e-05	5.90536e-05	6.6883e-05	0.000101991	0.000126817	4.01358e-05	7.79755e-05	0.000130561	9.56413e-05	9.57665e-05	9.3615e-05	0.000169624	6.27809e-05	8.57963e-05	1.3666	0.45059	0.0237304	1.10812	up
meta_356	Phosphatidylethanolamine lyso alkenyl 18:2	8.37403e-05	5.55562e-05	5.09308e-05	3.97563e-05	1.71309e-05	3.84005e-05	3.60786e-05	4.342e-05	5.03962e-05	4.11905e-05	3.07772e-05	2.82996e-05	2.04086e-05	2.73259e-05	1.03226e-05	4.52014e-05	6.31624e-05	7.29307e-05	0.000126097	3.20646e-05	0.000123842	8.05036e-05	5.96884e-05	4.62388e-05	6.65344e-05	0.000159711	3.86465e-05	5.57189e-05	5.1502e-05	9.87328e-05	3.0036e-05	8.8278e-05	3.60079e-05	8.45549e-05	6.9742e-05	9.99483e-05	5.86727e-05	4.14055e-05	4.56595e-05	7.16536e-05	1.5693	0.650124	0.0127498	1.35036	up
meta_359	Glycine	4.58042e-06	2.78694e-06	3.31052e-06	5.81697e-06	6.97329e-06	4.27612e-06	5.03467e-06	2.58271e-06	2.84564e-06	6.08288e-06	2.91979e-06	5.58859e-06	1.12284e-05	4.89028e-06	3.16303e-06	4.62672e-06	3.8707e-06	4.3179e-06	5.35129e-06	1.01788e-05	3.54513e-06	3.6236e-06	2.99157e-06	3.71117e-06	2.66421e-06	3.1515e-06	6.64118e-06	2.41881e-06	3.91509e-06	2.96384e-06	2.35657e-06	4.84774e-06	4.42289e-06	2.27223e-06	2.5961e-06	3.80031e-06	2.41604e-06	2.04274e-06	5.02129e-06	3.35448e-06	0.668053	-0.581966	0.00755111	1.10775	down
meta_360	L-Tyrosine	0.0095455	0.00757387	0.0105734	0.00998262	0.0127513	0.00983235	0.0116475	0.012035	0.0133338	0.0106522	0.0125691	0.0125488	0.0106219	0.00916171	0.0150576	0.0148035	0.00885006	0.0107554	0.0119574	0.00979898	0.00878287	0.0106656	0.0108516	0.00937597	0.0105191	0.00886939	0.0106902	0.00857826	0.0118754	0.00710456	0.0122892	0.00830107	0.0107291	0.0111129	0.0115907	0.00581961	0.00998037	0.0114971	0.0112026	0.00992405	0.88587	-0.174833	0.0390795	1.07125	down
meta_364	L-Histidine	0.0025074	0.00162651	0.00226726	0.00225035	0.00290037	0.00265501	0.00226488	0.0019638	0.00205227	0.00209637	0.00250885	0.00241723	0.00292244	0.0020754	0.00296122	0.00204598	0.0018716	0.00178309	0.00165392	0.00299866	0.00173056	0.00188355	0.00227421	0.00173607	0.00183545	0.00147616	0.00241219	0.00228858	0.00190631	0.00165053	0.00160124	0.00158355	0.00195062	0.00181714	0.00162608	0.00201931	0.00167597	0.00246884	0.00229113	0.00188535	0.822892	-0.281225	0.00177643	1.44852	down
meta_366	L-Phenylalanine	0.0458822	0.0504475	0.0472966	0.0544135	0.0634493	0.047988	0.045502	0.0573758	0.0468017	0.051031	0.0598131	0.057422	0.061632	0.0536739	0.0637523	0.0472625	0.0494285	0.0460225	0.0481084	0.0569553	0.0459219	0.0464694	0.0444565	0.0413445	0.0473003	0.0463274	0.0503295	0.0478608	0.0422517	0.0427554	0.0514372	0.0389866	0.0479006	0.0455164	0.0414083	0.0402638	0.0527716	0.0428859	0.0527129	0.0453438	0.860202	-0.217252	0.000101748	1.92818	down
meta_369	(5-L-Glutamyl)-L-Amino Acid	2.33191e-05	4.17722e-05	7.66625e-06	2.80166e-05	1.97826e-05	2.67465e-05	3.93643e-05	3.93597e-05	3.00975e-05	2.25435e-05	2.07533e-05	2.57099e-05	1.46526e-05	2.77506e-05	2.63102e-05	1.07373e-05	1.59201e-05	4.02895e-05	8.81613e-06	1.16356e-05	2.36711e-05	1.23391e-05	1.46769e-05	1.22507e-05	2.74363e-05	2.4609e-05	1.62206e-05	1.71862e-05	1.95115e-05	1.96304e-05	8.17985e-06	1.32258e-05	1.27191e-05	1.75823e-05	1.17158e-05	3.28982e-05	2.06134e-05	7.34657e-06	2.40622e-05	1.73229e-05	0.719923	-0.474085	0.0245277	1.2677	down
meta_371	Glyc-Pro	1.43604e-05	1.84622e-05	1.69945e-05	2.25691e-05	2.02587e-05	2.08558e-05	1.44005e-05	2.30002e-05	1.70319e-05	2.08331e-05	1.80235e-05	2.08722e-05	2.09145e-05	1.71804e-05	1.98667e-05	1.36999e-05	1.49817e-05	1.16714e-05	1.48e-05	1.77587e-05	1.30628e-05	1.0008e-05	1.50382e-05	7.61078e-06	1.08863e-05	1.31362e-05	1.24763e-05	1.30654e-05	1.21197e-05	9.04548e-06	1.11482e-05	1.13298e-05	1.29664e-05	8.69349e-06	9.65659e-06	8.07327e-06	1.2577e-05	1.39941e-05	1.79268e-05	1.13827e-05	0.634954	-0.655277	1.24572e-08	2.2546	down
meta_375	Nα-Acetyl-L-Arginine	2.51284e-05	3.21897e-05	2.75031e-05	3.34015e-05	4.18502e-05	3.14027e-05	2.43624e-05	3.05317e-05	2.37778e-05	2.94155e-05	3.4651e-05	3.01505e-05	3.18595e-05	2.75574e-05	3.3534e-05	2.99768e-05	2.69755e-05	2.57781e-05	2.20822e-05	3.24909e-05	2.09232e-05	2.48016e-05	2.93826e-05	2.05544e-05	2.34293e-05	2.68798e-05	3.39602e-05	1.97963e-05	2.34242e-05	2.22513e-05	2.38086e-05	1.90581e-05	1.9909e-05	2.01665e-05	1.83585e-05	1.99926e-05	2.41344e-05	1.87043e-05	2.97309e-05	2.27519e-05	0.765261	-0.385976	1.65944e-05	1.9314	down
meta_383	2-Methoxybenzoic Acid	5.98284e-05	4.70809e-05	5.20399e-05	5.12521e-05	7.15981e-05	3.81825e-05	5.79728e-05	6.34007e-05	5.26798e-05	6.35141e-05	5.42685e-05	6.04554e-05	0.00010499	6.65552e-05	7.45973e-05	5.86725e-05	5.72175e-05	5.53686e-05	5.30029e-05	9.93226e-05	4.51693e-05	4.83867e-05	6.66944e-05	5.63444e-05	6.03691e-05	5.05328e-05	5.42006e-05	4.78705e-05	5.49562e-05	6.25674e-05	4.89116e-05	4.81924e-05	4.9791e-05	2.06443e-05	3.18329e-05	5.97354e-05	5.91876e-05	3.81469e-05	6.21e-05	5.01963e-05	0.808314	-0.307012	0.0114998	1.21471	down
meta_386	2-Hydroxy-6-Aminopurine	3.10343e-06	2.46201e-06	2.39394e-06	1.03955e-06	2.56744e-06	5.39648e-07	1.69696e-06	3.36918e-06	2.8788e-06	3.06942e-06	4.92917e-06	4.90759e-06	1.75607e-06	1.69341e-06	3.7285e-06	1.54386e-06	2.71689e-06	8.75444e-06	1.14866e-06	4.34651e-06	1.95634e-06	3.03258e-06	2.38578e-06	1.16004e-06	9.09808e-07	1.15887e-06	4.25488e-06	6.10112e-06	3.81249e-07	1.91509e-07	1.55334e-06	3.60321e-07	2.89887e-07	1.86615e-07	2.84826e-07	3.23262e-07	9.30672e-07	3.88189e-07	2.93227e-06	1.43607e-06	0.489747	-1.02989	0.0113518	1.34823	down
meta_392	Guanosine	9.95605e-05	8.96806e-05	6.87191e-05	0.000101106	0.000112166	5.0215e-05	8.74485e-05	8.64009e-05	0.00019967	0.000234661	0.00027131	0.000283251	9.09943e-05	0.000191169	0.000320144	0.000137825	0.000198342	0.000334999	9.6699e-05	0.000112895	0.00015942	0.000167181	6.95083e-05	0.000166005	4.77315e-05	3.50409e-05	0.000181591	0.000167442	3.99591e-05	1.57738e-05	3.59189e-05	1.0181e-05	1.19645e-09	5.2029e-06	4.81883e-06	5.59931e-06	8.09336e-05	3.65026e-05	0.000158363	6.82673e-05	0.431081	-1.21397	0.00116301	1.71415	down
meta_396	D-Fructose	0.00273996	0.00292375	0.00314776	0.00338925	0.00443266	0.00319103	0.00288626	0.0031972	0.00259966	0.00276171	0.00320161	0.00319639	0.00482262	0.00308301	0.00339898	0.00272292	0.00289819	0.00249194	0.00281685	0.00351581	0.0023388	0.00241101	0.00248869	0.00247687	0.0023205	0.00235339	0.00303361	0.00272028	0.00220372	0.0020965	0.00218143	0.00197094	0.00245366	0.00192197	0.00212472	0.00183854	0.00221637	0.0021351	0.00317088	0.00229367	0.723355	-0.467224	1.45519e-06	2.07915	down
meta_397	D-Gluconic Acid	0.000114675	0.000125601	0.000125065	0.000123406	0.000161948	0.000123077	0.000110792	0.000121381	0.000102285	0.00010985	0.000128755	0.000110537	0.000166348	0.000112075	0.000135801	0.00011123	0.000102674	0.000104639	0.000105959	0.000140933	8.93467e-05	0.000102473	0.000108913	8.74204e-05	9.67003e-05	8.88271e-05	0.000118652	0.000100602	8.96473e-05	9.0309e-05	9.88376e-05	8.90429e-05	9.09822e-05	8.34373e-05	9.62076e-05	8.52871e-05	0.000100721	0.00010019	0.000121851	9.5422e-05	0.783102	-0.352728	2.91224e-06	1.97009	down
meta_399	Nicotinuric Acid	1.68631e-05	2.03941e-05	9.43912e-06	1.8755e-05	1.75019e-05	7.15741e-06	3.04085e-06	1.82167e-05	2.01056e-05	1.73751e-05	2.20609e-05	2.66541e-05	1.35244e-05	1.50213e-05	1.85179e-05	2.97357e-05	3.83325e-05	1.48103e-05	2.4596e-05	1.81179e-05	2.8678e-05	2.24919e-05	3.71277e-05	2.09222e-05	2.94411e-05	1.42329e-05	2.97216e-05	2.26336e-05	1.46982e-05	2.91293e-05	4.13446e-05	2.31607e-05	2.68311e-05	2.53449e-05	3.05803e-05	1.74838e-05	4.72293e-05	2.78081e-05	1.8511e-05	2.71589e-05	1.46717	0.55304	0.00261429	1.37065	up
meta_402	5-Hydroxytryptophol	5.06525e-05	4.48128e-05	4.63202e-05	6.00104e-05	6.04049e-05	6.10143e-05	6.03729e-05	7.63332e-05	6.52416e-05	7.53757e-05	6.42253e-05	7.68929e-05	6.8813e-05	6.6387e-05	7.17478e-05	6.07457e-05	5.36698e-05	5.2474e-05	4.75901e-05	6.3859e-05	4.48425e-05	4.57805e-05	4.48577e-05	4.68138e-05	4.40835e-05	4.23514e-05	6.19278e-05	4.29536e-05	5.12107e-05	4.51526e-05	4.32937e-05	4.6471e-05	4.42714e-05	3.88776e-05	4.27781e-05	5.43179e-05	4.58229e-05	3.47532e-05	6.13472e-05	4.55867e-05	0.743093	-0.428384	8.90954e-07	2.2509	down
meta_403	4-Guanidinobutyric Acid	0.000446083	0.000431563	0.000327222	0.00041838	0.00101856	0.000236534	0.000266118	0.000542931	0.000243425	0.000358269	0.000409517	0.000393644	0.000443837	0.000424666	0.000430917	0.00032184	0.000478453	0.000433035	0.000258016	0.000367325	0.000302038	0.000201041	0.000243744	0.000156873	0.000364833	0.000341471	0.000263639	0.000266514	0.000359222	0.000277243	0.000403976	0.000140973	0.000177367	0.000231196	0.000223585	0.000214175	0.000324197	0.00014556	0.000412517	0.000257647	0.624573	-0.679057	0.000836159	1.64234	down
meta_405	7-Methyluric Acid	8.61497e-05	5.48287e-05	6.32691e-05	7.35986e-05	9.16581e-05	4.86104e-05	6.53499e-05	5.58661e-05	5.87586e-05	5.40407e-05	6.62268e-05	7.31177e-05	9.81543e-05	6.70507e-05	7.75169e-05	4.93871e-05	6.76944e-05	5.31439e-05	6.9768e-05	7.39837e-05	5.38015e-05	5.71188e-05	5.48342e-05	5.49611e-05	4.38807e-05	6.14998e-05	8.94416e-05	4.97879e-05	4.50548e-05	4.45545e-05	6.97665e-05	5.01018e-05	8.46105e-05	5.88733e-05	5.7992e-05	4.85357e-05	5.88261e-05	4.78351e-05	6.74087e-05	5.73042e-05	0.850102	-0.234293	0.023849	1.02101	down
meta_408	Guanidineacetic Acid	7.56794e-06	7.63648e-06	8.12274e-06	7.8404e-06	8.26976e-06	9.18218e-06	9.61946e-06	7.08279e-06	5.91614e-06	8.72772e-06	1.18959e-05	7.58393e-06	9.80431e-06	7.2692e-06	9.80016e-06	8.81509e-06	1.1389e-05	1.38336e-05	4.25307e-06	1.23023e-05	7.30343e-06	5.22848e-06	5.27567e-06	6.704e-06	1.06263e-05	8.77088e-06	4.30843e-06	5.43238e-06	7.29541e-06	7.87959e-06	5.00591e-06	6.60954e-06	8.47673e-06	6.83353e-06	5.33412e-06	7.93746e-06	3.92041e-06	3.96611e-06	8.84561e-06	6.49491e-06	0.734252	-0.445653	0.00115134	1.6147	down
meta_413	LPC(0:0/14:0)	0.000928426	0.00228202	0.00270882	0.00148914	0.000756978	0.0023576	0.00271228	0.00161005	0.0028867	0.00215756	0.000898228	0.00251419	0.0011951	0.000863313	0.00109362	0.00208539	0.00165231	0.00140631	0.00144591	0.00176999	0.00323702	0.000712386	0.00506202	0.00323211	0.00261362	0.00643727	0.00267031	0.00296273	0.00387418	0.00301883	0.00308074	0.00416741	0.00298382	0.00295963	0.00289241	0.0040871	0.00147082	0.00366253	0.0017407	0.00328472	1.88701	0.916105	8.19785e-05	1.86543	up
meta_414	LPC(16:0/0:0)	0.0634896	0.0678387	0.068094	0.0698515	0.0776943	0.0696368	0.065287	0.0682537	0.0637714	0.0660096	0.0687831	0.0676595	0.0774813	0.0673752	0.0725383	0.0646808	0.0587034	0.0632739	0.0595022	0.0714979	0.0640084	0.0613912	0.0675352	0.0613831	0.0648286	0.0641787	0.0704643	0.0600262	0.0635542	0.0629999	0.0636407	0.0631911	0.0665055	0.065329	0.061968	0.0607797	0.0647066	0.0652367	0.0675711	0.0639848	0.946926	-0.0786763	0.00785731	1.31345	down
meta_417	Taurocholic Acid Sodium Salt Hydrate	0.000621642	0.000701778	0.000768035	0.000779663	0.00108754	0.000760295	0.000655739	0.000740132	0.000587249	0.000691912	0.000846333	0.000710151	0.000948656	0.000750517	0.000910186	0.000670858	0.000692181	0.000676671	0.000673359	0.000900169	0.000594813	0.000567379	0.000624955	0.000484428	0.000561192	0.000570407	0.000649211	0.00061359	0.000513728	0.000449512	0.000547835	0.000444909	0.000581715	0.000569648	0.000552081	0.000452023	0.000550093	0.000499587	0.000758654	0.00054595	0.719631	-0.474671	1.92373e-07	2.22527	down
meta_418	4-(Aminomethyl)-5-(Hydroxymethyl)-2-Methylpyridin-3-Ol	1.64748e-05	3.86114e-05	3.32657e-05	3.50043e-05	3.85041e-05	3.91963e-05	3.29566e-05	4.42033e-05	2.21988e-05	2.76226e-05	3.84625e-05	3.20853e-05	3.86726e-05	2.32597e-05	4.12597e-05	3.8386e-05	3.43549e-05	2.79924e-05	2.60552e-05	3.59906e-05	2.04472e-05	2.54567e-05	2.5769e-05	1.6814e-05	2.06302e-05	2.38052e-05	2.21283e-05	1.92172e-05	2.14419e-05	1.36842e-05	2.4182e-05	2.14392e-05	2.5079e-05	1.79288e-05	1.61334e-05	1.38966e-05	2.29169e-05	1.61828e-05	3.32278e-05	2.03974e-05	0.613864	-0.704009	1.13856e-07	2.20456	down
meta_419	N-Acetylglycine	0.00507658	0.00541171	0.00461363	0.00646222	0.00765039	0.0064093	0.00563299	0.00623268	0.0046746	0.00600891	0.00553699	0.0050594	0.00867953	0.0053699	0.00631445	0.00449821	0.00509496	0.00649638	0.00432762	0.00450395	0.00435458	0.00545698	0.00401024	0.00316523	0.00589823	0.00426303	0.00393145	0.0047236	0.00443822	0.00494702	0.00612085	0.00291499	0.00569804	0.00509919	0.00562273	0.00290007	0.00425156	0.00481617	0.00570272	0.00458956	0.804803	-0.313293	0.00231698	1.58353	down
meta_421	Pantetheine	0.0356399	0.0386389	0.0325756	0.0384189	0.0495942	0.034143	0.0335527	0.0423603	0.0318449	0.035567	0.040559	0.0373367	0.052454	0.0340379	0.0440956	0.0346743	0.0315656	0.0321981	0.0338876	0.0411386	0.0317836	0.0308405	0.0337285	0.0285535	0.0311536	0.0287219	0.0358079	0.0372679	0.024587	0.0240468	0.0343445	0.0299352	0.0310307	0.0286507	0.0300732	0.0280549	0.0335879	0.0329625	0.0377141	0.0308406	0.817746	-0.290274	9.96723e-05	1.81644	down
meta_422	4-Hydroxyretinoic Acid	1.01532e-05	1.50173e-05	4.92216e-06	1.31796e-05	1.11236e-05	9.79722e-06	7.16907e-06	1.13182e-05	1.3598e-05	1.74783e-05	1.90267e-05	1.60584e-05	5.49684e-06	1.33618e-05	7.11007e-06	1.17088e-05	2.15891e-05	1.52639e-05	2.07311e-05	9.41158e-06	3.51014e-05	1.74603e-05	7.3251e-06	2.61595e-05	1.50749e-05	1.9459e-05	1.66476e-05	1.711e-05	2.19954e-05	1.57799e-05	1.39824e-05	1.76659e-05	3.19426e-05	1.17234e-05	1.36573e-05	1.6914e-05	1.88509e-05	4.10589e-05	1.26757e-05	1.98838e-05	1.56865	0.649524	0.00402034	1.42164	up
meta_424	5'-Deoxy-5'-(Methylthio) Adenosine	3.10799e-05	2.50462e-05	2.48562e-05	3.29897e-05	4.02175e-05	1.78229e-05	2.2113e-05	2.51243e-05	3.43306e-05	2.82922e-05	1.69057e-05	3.99309e-05	1.62105e-05	2.39057e-05	3.54803e-05	1.66249e-05	2.29668e-05	4.6054e-05	1.17408e-05	1.39511e-05	2.82329e-05	1.30163e-05	2.67967e-05	1.0575e-05	2.09813e-05	3.03879e-05	2.23619e-05	1.4184e-05	2.6948e-05	3.18219e-05	1.43804e-05	1.27134e-05	2.81711e-05	1.84004e-05	1.33091e-05	1.34572e-05	2.55833e-05	1.86492e-05	2.62822e-05	2.05539e-05	0.782047	-0.354673	0.0425754	1.02079	down
meta_425	Sarcosine	0.000125117	0.00027281	0.000218761	0.000238059	0.000276896	0.000231974	0.000191024	0.000268615	0.000200875	0.000207355	0.000230837	0.000209501	0.00025332	0.000189561	0.000215023	0.000183027	0.00017318	0.000177234	0.000164034	0.000227287	0.000123666	0.000125005	0.000132074	0.000135499	0.000137308	0.000128079	0.000154991	0.000141521	0.000123273	9.86129e-05	0.000135817	0.000107767	0.0001246	0.000115581	0.000143069	9.81496e-05	0.000113898	0.000113214	0.000212725	0.000125118	0.588169	-0.765697	1.34964e-09	2.45154	down
meta_428	LPC(17:0/0:0)	0.00701927	0.00830401	0.00744457	0.011212	0.00530697	0.00860558	0.0112766	0.00711248	0.00717077	0.00818585	0.00793782	0.00669327	0.00509227	0.00520014	0.00475086	0.0100058	0.01002	0.0101208	0.0122404	0.00729951	0.0112898	0.0110783	0.0111761	0.0113837	0.0110848	0.0113015	0.00708109	0.00924575	0.00842361	0.00880785	0.00943561	0.0184584	0.013835	0.01317	0.0128966	0.014233	0.0109813	0.00920124	0.00804994	0.0112824	1.40155	0.487027	0.000250645	1.7141	up
meta_429	N-Formylmethionine	3.51236e-06	9.71994e-06	7.75503e-06	2.06872e-05	8.80758e-06	8.42232e-06	5.07909e-06	8.44158e-06	1.14507e-05	7.75797e-06	7.3102e-06	1.58021e-05	8.2282e-06	2.17392e-05	2.44526e-06	6.46971e-06	1.64649e-05	1.6141e-05	6.81522e-06	1.29806e-05	2.71008e-06	3.54432e-06	9.50877e-06	5.69244e-06	5.54745e-06	3.16241e-06	2.64502e-06	1.59476e-05	4.43328e-06	6.81318e-06	4.43712e-07	1.31827e-06	4.49507e-06	4.12019e-06	4.77986e-06	9.68754e-06	2.73609e-06	4.96508e-06	1.03015e-05	5.14169e-06	0.49912	-1.00254	0.00132403	1.47013	down
meta_430	Sn-Glycero-3-Phosphocholine	0.000265567	0.000254332	0.000248175	0.000235863	0.0002003	0.000420829	0.000403128	0.00021282	0.000200603	0.000222397	0.000168648	0.000127054	0.000415971	0.000137949	0.000178827	0.000210705	0.00014111	0.000176945	0.000283348	0.000319874	0.000284194	0.000223099	0.000398963	0.000334231	0.000450192	0.000329173	0.000292768	0.00028059	0.000341971	0.000690746	0.000163707	0.000443892	0.000420128	0.000434928	0.000390166	0.000529882	0.00037432	0.000441535	0.000241222	0.000379138	1.57174	0.65236	0.000351686	1.75224	up
meta_431	Indole	0.000738834	0.000879067	0.000957119	0.00125738	0.00102137	0.00106935	0.00116149	0.00123965	0.00131486	0.00138305	0.00133791	0.00118409	0.00120251	0.000949783	0.00133071	0.0013704	0.00108064	0.00107865	0.000985698	0.000946278	0.000806193	0.000771735	0.000866981	0.000869169	0.0010652	0.000741225	0.000965678	0.00111391	0.000892812	0.000894168	0.000850309	0.000862692	0.000762393	0.000919042	0.000903522	0.000824306	0.000921045	0.000685378	0.00112444	0.000873098	0.776472	-0.364994	1.01487e-05	2.18017	down
meta_433	LPC(15:0/0:0)	0.00310123	0.00472128	0.00347329	0.00596215	0.0029626	0.00380606	0.00550251	0.00440264	0.00431231	0.00653798	0.00365412	0.0054579	0.00274325	0.00286842	0.00317788	0.00539601	0.00510483	0.0049515	0.00592403	0.00466072	0.0068888	0.00428625	0.00749671	0.00769679	0.00537219	0.00642789	0.00393606	0.00687377	0.00606131	0.00521838	0.0065377	0.0142409	0.00703049	0.00835078	0.00847376	0.00798685	0.00617102	0.00567611	0.00443604	0.00692921	1.56203	0.64342	0.000258845	1.71701	up
meta_438	L-Norleucine	0.00105188	0.00165695	0.0015837	0.00237891	0.00175501	0.00183879	0.0019595	0.00213768	0.00232985	0.00247407	0.00239658	0.0019333	0.00185931	0.00140936	0.00190967	0.00222283	0.00180265	0.00171282	0.00157063	0.00135023	0.00110909	0.00101835	0.0014141	0.00123396	0.00158611	0.000999411	0.00130717	0.00161374	0.00124437	0.00135792	0.00115704	0.00125745	0.00095017	0.00137492	0.00133507	0.00121399	0.00125014	0.000921212	0.00186669	0.00124135	0.665	-0.588575	4.31931e-07	2.30294	down
meta_442	2-Pyrrolidinone	0.000739496	0.000626692	0.000594495	0.000902093	0.000551242	0.000676235	0.0010922	0.0010562	0.00123818	0.00129433	0.000996618	0.00114663	0.000731462	0.0011988	0.00132965	0.000888619	0.000796638	0.000930218	0.000624442	0.000684094	0.000730343	0.00106099	0.000764469	0.000814229	0.00112894	0.000832485	0.000990538	0.000767469	0.00168807	0.00201197	0.00166095	0.00136687	0.00113595	0.00156701	0.00167654	0.00180886	0.00181114	0.00133184	0.000904916	0.00128604	1.42117	0.507077	0.00263599	1.28594	up
meta_446	N-Alpha-acetyllysine	0.000124643	0.000135593	0.000137968	0.000181389	0.000117482	0.000107956	0.000123485	0.000132888	0.000151666	0.000161927	0.000175603	0.000140052	0.000139728	8.86704e-05	0.000127252	0.000110899	0.00015582	0.000163442	0.000103913	0.0001112	0.00019153	0.000122489	0.000193484	0.000128588	0.000171024	0.000160485	0.000195427	0.000130622	0.000172822	0.000270792	0.000182223	8.98737e-05	0.000127707	0.000143792	0.000148241	0.000133654	0.000213625	0.000161815	0.000134579	0.000163233	1.21292	0.27848	0.0170005	1.03115	up
[truncated: 68 more rows]

## Sheet: B vs C
#ID	name	BX23	Bx24	Bx25	Bx26	Bx28	Bx37	Bx40	Bx52	Bx54	Bx56	Bx57	Bx59	Bx61	Bx62	Bx68	Bx72	Bx74	Bx80	Bx81	Bx88	Cc106	Cc113	Cc124	Cc128	Cx121	Cx133	Cx142	Cx145	Cx146	Cx149	Cx150	Cx23	Cx25	Cx49	Cx50	Cx61	Cx63	Cx88	B_Mean	C_Mean	Fold_change	log2FC	Pvalue	VIP	regulated
[truncated: 236 more rows]

[truncated: 1 more sheets: C vs D]
