# Supplementary material for: Metabolomic approaches to dissect dysregulated metabolism in the progression of pre-diabetes to T2DM
Source: Royal Society of Chemistry journal article supplement (doi:10.1039/d3mo00130j), 2024-04-30
Supplement: d3mo00130j9.xlsx [file d3mo00130j9.xlsx]

## Sheet: classification 324 metabolite
#ID	Compounds	Class I	Class II	A_vs_B_log2FC	A_vs_B_Pvalue	A_vs_B_VIP	A_vs_B_(FC_1_Pvalue_0.05_VIP_1)_regulated	B_vs_C_log2FC	B_vs_C_Pvalue	B_vs_C_VIP	B_vs_C_(FC_1_Pvalue_0.05_VIP_1)_regulated	C_vs_D_log2FC	C_vs_D_Pvalue	C_vs_D_VIP	C_vs_D_(FC_1_Pvalue_0.05_VIP_1)_regulated
meta_1	L-Cystine	Amino acid and Its metabolomics	Amino acids	0.29007	0.0148041	1.51514	up	-0.479321	0.000273841	1.56038	down	-0.209202	0.334441	0.722189	unchanged
meta_2	L-Arginine	Amino acid and Its metabolomics	Amino acids	0.227077	0.0704238	1.34975	unchanged	-0.324547	0.00621117	1.29116	down	0.0760329	0.502835	0.464479	unchanged
meta_3	L-Aspartic Acid	Amino acid and Its metabolomics	Amino acids	0.0505443	0.620533	0.173405	unchanged	-0.779782	3.56264e-06	1.96944	down	0.436886	0.00790046	1.82373	up
meta_13	L-Glutamine	Amino acid and Its metabolomics	Amino acids	0.152907	0.0549697	1.0599	unchanged	-0.436188	0.000236429	1.62349	down	-0.0389024	0.641726	0.394475	unchanged
meta_15	L-Saccharopine	Amino acid and Its metabolomics	Amino acids	0.294195	0.0318376	1.22976	up	-0.29153	0.0171149	1.11563	down	0.173973	0.184063	0.897497	unchanged
meta_357	2-Octanamidoacetic acid	Amino acid and Its metabolomics	Amino acids	0.374779	0.000158896	2.52439	up	-0.210277	0.0217873	1.04375	down	0.0786542	0.286836	0.753873	unchanged
meta_363	L-Alanine	Amino acid and Its metabolomics	Amino acids	-0.0404727	0.537109	0.307554	unchanged	0.236213	0.00774409	1.25897	up	-0.149908	0.172896	1.0114	unchanged
meta_364	L-Histidine	Amino acid and Its metabolomics	Amino acids	-0.0328276	0.765047	0.0663518	unchanged	-0.222697	0.00711836	1.18439	down	-0.0502743	0.524736	0.448283	unchanged
meta_366	L-Phenylalanine	Amino acid and Its metabolomics	Amino acids	0.022919	0.587882	0.227628	unchanged	-0.232144	1.68423e-05	1.84692	down	0.019165	0.561308	0.414181	unchanged
meta_372	L-Homocystine	Amino acid and Its metabolomics	Amino acids	0.0138203	0.99902	0.308491	unchanged	-1.54326	0.000252198	1.57846	down	0.894822	0.0375181	1.44362	up
meta_425	Sarcosine	Amino acid and Its metabolomics	Amino acids	-0.209054	0.00525047	1.8831	down	-0.639736	1.30962e-08	2.27009	down	-0.111664	0.0687047	1.25175	unchanged
meta_438	L-Norleucine	Amino acid and Its metabolomics	Amino acids	-0.446459	1.14435e-06	2.58859	down	-0.338202	0.0005373	1.50032	down	-0.23701	0.00574574	1.80723	down
meta_474	β-Alanine	Amino acid and Its metabolomics	Amino acids	-0.0404727	0.537109	0.307554	unchanged	0.236213	0.00774409	1.25897	up	-0.149908	0.172896	1.0114	unchanged
meta_480	DL-O-tyrosine	Amino acid and Its metabolomics	Amino acids	0.022919	0.587882	0.227628	unchanged	-0.232144	1.68423e-05	1.84692	down	0.019165	0.561308	0.414181	unchanged
meta_673	N-Formylglycine	Amino acid and Its metabolomics	Amino acids	-0.222278	0.0557539	0.933412	unchanged	0.485123	1.02858e-05	1.86554	up	-0.0920623	0.107535	1.18904	unchanged
meta_674	D-Pyroglutamic acid	Amino acid and Its metabolomics	Amino acids	-0.327788	0.0502613	1.26804	unchanged	0.676767	0.000718848	1.53459	up	-0.594493	0.00283006	2.10958	down
meta_680	DL-2-Methylglutamic acid	Amino acid and Its metabolomics	Amino acids	-1.03166	0.0139546	1.45351	down	0.614693	0.677154	0.19973	unchanged	-0.199554	0.112495	1.02495	unchanged
meta_16	N6-Acetyl-L-Lysine	Amino acid and Its metabolomics	Amino acid derivatives	-0.207664	0.270467	0.829475	unchanged	-0.148882	0.179744	0.672746	unchanged	0.297997	0.00812791	1.65392	up
meta_17	N-Acetyl-L-Leucine	Amino acid and Its metabolomics	Amino acid derivatives	-0.199472	0.296091	0.767166	unchanged	0.0821852	0.398164	0.426768	unchanged	0.265862	0.0149766	1.65441	up
meta_24	S-(5-Adenosy)-L-Homocysteine	Amino acid and Its metabolomics	Amino acid derivatives	-0.129682	0.462323	0.257599	unchanged	0.586527	6.57566e-05	1.692	up	-0.0292294	0.842841	0.249804	unchanged
meta_25	S-Sulfo-L-Cysteine	Amino acid and Its metabolomics	Amino acid derivatives	0.0206329	0.898539	0.258752	unchanged	0.730614	0.00343501	1.36738	up	-0.279712	0.50953	0.50453	unchanged
meta_130	N8-Acetylspermidine	Amino acid and Its metabolomics	Amino acid derivatives	0.164604	0.111989	0.980424	unchanged	-0.194045	0.016566	1.11612	down	0.0994628	0.17125	0.916067	unchanged
meta_146	N-lactoyl-phenylalanine	Amino acid and Its metabolomics	Amino acid derivatives	-0.0930303	0.679126	0.248911	unchanged	1.35255	6.46923e-06	2.08742	up	-0.32117	0.0838994	1.26769	unchanged
meta_151	O-Acetyl-L-serine	Amino acid and Its metabolomics	Amino acid derivatives	0.322597	0.00139014	1.69757	up	-0.103138	0.267898	0.512544	unchanged	-0.431828	0.000104501	2.52957	down
meta_199	N-acetylornithine	Amino acid and Its metabolomics	Amino acid derivatives	0.350472	0.00718087	1.8361	up	-0.410244	0.00147394	1.44877	down	0.114289	0.350739	0.634776	unchanged
meta_245	L-tyrosine methyl ester 4-sulfate	Amino acid and Its metabolomics	Amino acid derivatives	-0.247086	0.346928	0.49519	unchanged	0.831891	0.0133017	1.14615	up	0.351312	0.273692	0.704516	unchanged
meta_288	N-Palmitoylglycine	Amino acid and Its metabolomics	Amino acid derivatives	0.379695	0.00362829	2.28704	up	0.358482	0.0376769	0.979046	unchanged	0.0991911	0.652339	0.257001	unchanged
meta_311	N-Arachidonoyl-L-Alanine	Amino acid and Its metabolomics	Amino acid derivatives	0.183291	0.185452	1.35629	unchanged	0.64865	0.000250463	1.58715	up	-0.079136	0.792887	0.0708622	unchanged
meta_349	N-Acetyglutamic acid	Amino acid and Its metabolomics	Amino acid derivatives	-0.236271	0.108657	0.732577	unchanged	0.600103	0.000129126	1.68901	up	-0.36439	0.00951491	1.8333	down
meta_351	L-threo-3-Methylaspartate	Amino acid and Its metabolomics	Amino acid derivatives	0.0426084	0.596919	0.34514	unchanged	0.154854	0.325779	0.484188	unchanged	-0.260928	0.0467555	1.39003	down
meta_370	5-Oxoproline	Amino acid and Its metabolomics	Amino acid derivatives	-0.66474	0.000384325	2.12608	down	0.614259	0.00469592	1.30728	up	-0.654586	0.00229597	2.13252	down
meta_375	Nα-Acetyl-L-Arginine	Amino acid and Its metabolomics	Amino acid derivatives	-0.00176338	0.946813	0.0941846	unchanged	-0.294611	0.000109467	1.63674	down	-0.0951962	0.254133	0.784095	unchanged
meta_380	L-Alanyl-L-Lysine	Amino acid and Its metabolomics	Amino acid derivatives	-0.0895122	0.381125	0.386692	unchanged	0.408854	0.00231586	1.46591	up	-0.163957	0.252001	0.822599	unchanged
meta_405	7-Methyluric Acid	Amino acid and Its metabolomics	Amino acid derivatives	-0.124144	0.174765	0.758984	unchanged	-0.323383	0.000445246	1.54265	down	0.0870067	0.274717	0.762345	unchanged
meta_419	N-Acetylglycine	Amino acid and Its metabolomics	Amino acid derivatives	-0.0661412	0.462028	0.597315	unchanged	-0.299552	0.00179053	1.43031	down	-0.0234889	0.893963	0.117701	unchanged
meta_429	N-Formylmethionine	Amino acid and Its metabolomics	Amino acid derivatives	0.0913804	0.456985	0.54993	unchanged	-0.688061	0.00927255	1.14018	down	-0.468906	0.288889	0.74872	unchanged
meta_448	N-Acetyl-L-Histidine	Amino acid and Its metabolomics	Amino acid derivatives	-0.125183	0.216631	1.10082	unchanged	-0.329825	0.00145978	1.47241	down	-0.146604	0.0805915	1.12774	unchanged
meta_462	Gly-Phe	Amino acid and Its metabolomics	Amino acid derivatives	-0.160378	0.296574	0.474559	unchanged	-1.05987	0.00168536	1.46097	down	0.730992	0.0539838	1.33536	unchanged
meta_463	N-Methylalanine	Amino acid and Its metabolomics	Amino acid derivatives	-0.106615	0.188163	0.498774	unchanged	0.3379	3.14706e-05	1.73239	up	-0.0422252	0.475676	0.621942	unchanged
meta_464	O-Succinyl-L-Homoserine	Amino acid and Its metabolomics	Amino acid derivatives	0.148931	0.700326	0.0275686	unchanged	-0.582919	0.026219	1.06244	down	0.207261	0.436555	0.54708	unchanged
meta_466	N-Alpha-Acetyl-L-Asparagine	Amino acid and Its metabolomics	Amino acid derivatives	0.328489	0.0543152	1.3834	unchanged	-0.618775	0.000431068	1.55888	down	0.198181	0.274329	0.805041	unchanged
meta_470	L-Tryptophanamide	Amino acid and Its metabolomics	Amino acid derivatives	1.52567	2.64406e-10	3.20272	up	0.246983	0.0461879	0.947298	unchanged	-0.158086	0.0730125	1.14833	unchanged
meta_497	N-Methyl-α-aminoisobutyric acid	Amino acid and Its metabolomics	Amino acid derivatives	0.21427	0.374603	0.382303	unchanged	-0.567759	0.00258978	1.39018	down	-0.0026714	0.942358	0.0298049	unchanged
meta_601	N,N-Dimethylarginine	Amino acid and Its metabolomics	Amino acid derivatives	0.0952644	0.397401	0.572765	unchanged	-0.169249	0.204255	0.609614	unchanged	0.385077	0.00918322	1.71542	up
meta_618	Methyldopa	Amino acid and Its metabolomics	Amino acid derivatives	-0.30501	0.0297863	1.37729	down	-0.000913383	0.878475	0.0745634	unchanged	-0.519378	0.00105139	2.20931	down
meta_629	L-Methionine sulfoxide	Amino acid and Its metabolomics	Amino acid derivatives	0.0178325	0.698117	0.549769	unchanged	0.0904247	0.263708	0.551009	unchanged	-0.148646	0.0444013	1.378	down
meta_8	Asp-phe	Amino acid and Its metabolomics	Small Peptide	-0.0934846	0.858367	0.053917	unchanged	-2.29112	0.000780401	1.45203	down	1.32381	0.0770631	1.27704	unchanged
meta_9	Glutathione Oxidized	Amino acid and Its metabolomics	Small Peptide	0.270883	0.0282104	1.07676	up	-0.287015	0.0173367	1.10115	down	0.139883	0.0158001	1.70044	up
meta_23	Phe-Phe	Amino acid and Its metabolomics	Small Peptide	-0.257203	0.694952	0.359694	unchanged	-1.39074	0.0021473	1.35135	down	1.58255	0.00065397	2.28882	up
meta_221	Gly-Val	Amino acid and Its metabolomics	Small Peptide	0.0636213	0.968745	0.206798	unchanged	-2.3785	0.00066814	1.48268	down	1.15259	0.217464	0.966566	unchanged
meta_310	Glu-Gln	Amino acid and Its metabolomics	Small Peptide	0.58891	0.00233894	1.95549	up	-1.52668	3.63258e-06	1.96286	down	0.380813	0.16598	1.01886	unchanged
meta_325	Cyclo(his-pro)	Amino acid and Its metabolomics	Small Peptide	0.465655	0.0302318	1.32471	up	-0.576548	0.00655847	1.25777	down	0.413025	0.0551227	1.29396	unchanged
meta_332	Pro-Gly	Amino acid and Its metabolomics	Small Peptide	0.150311	0.220159	0.618032	unchanged	-0.591749	0.000171856	1.63922	down	0.189928	0.167328	1.08402	unchanged
meta_353	Leu-Ile	Amino acid and Its metabolomics	Small Peptide	0.386318	0.0611512	1.19983	unchanged	-1.47054	0.000138699	1.6741	down	0.519826	0.14037	1.00975	unchanged
meta_369	(5-L-Glutamyl)-L-Amino Acid	Amino acid and Its metabolomics	Small Peptide	0.236006	0.166341	1.12513	unchanged	-0.436692	0.0140506	1.09666	down	0.0166063	0.844136	0.150927	unchanged
meta_371	Glyc-Pro	Amino acid and Its metabolomics	Small Peptide	0.0778782	0.265296	0.700937	unchanged	-0.562559	9.93213e-08	2.12169	down	-0.0953424	0.304512	0.791273	unchanged
meta_475	γ-L-Glutamate-Cysteine	Amino acid and Its metabolomics	Small Peptide	-0.358471	0.0597018	1.19758	unchanged	0.292036	0.167966	0.643897	unchanged	-0.533028	0.00388021	2.04882	down
meta_476	Threoninyl-Phenylalanine	Amino acid and Its metabolomics	Small Peptide	-0.413334	0.0631737	1.41755	unchanged	-1.20037	0.000115764	1.66288	down	0.764902	0.0578973	1.32648	unchanged
meta_508	Leu-Gly	Amino acid and Its metabolomics	Small Peptide	0.363748	0.063207	1.24749	unchanged	-1.33851	0.000203091	1.68779	down	0.245156	0.468532	0.490975	unchanged
meta_580	Phe-Asn	Amino acid and Its metabolomics	Small Peptide	-0.361236	0.275415	0.773411	unchanged	-1.78388	0.000383697	1.53608	down	1.2523	0.0261025	1.62531	up
meta_581	Phe-Met	Amino acid and Its metabolomics	Small Peptide	-0.133069	0.299632	0.562914	unchanged	-0.879126	1.07629e-05	1.84293	down	0.402113	0.053747	1.36667	unchanged
meta_582	Glu-Met	Amino acid and Its metabolomics	Small Peptide	0.594319	0.000164533	2.58143	up	-0.477719	0.0169525	1.09602	down	0.150519	0.577242	0.483142	unchanged
meta_583	Met-Glu	Amino acid and Its metabolomics	Small Peptide	0.594319	0.000164533	2.58143	up	-0.477719	0.0169525	1.09602	down	0.150519	0.577242	0.483142	unchanged
meta_603	Phe-Glu	Amino acid and Its metabolomics	Small Peptide	-0.342628	0.141876	0.90857	unchanged	-1.04041	0.000169955	1.6292	down	0.811209	0.00481509	1.92149	up
meta_604	Glu Val Phe	Amino acid and Its metabolomics	Small Peptide	-0.0966056	0.714371	0.295666	unchanged	-1.58108	0.00225583	1.36077	down	1.20576	0.0423579	1.47381	up
meta_605	Leu-Gly-Leu	Amino acid and Its metabolomics	Small Peptide	-0.185355	0.192992	0.704759	unchanged	-1.00688	1.3441e-06	1.94672	down	0.306362	0.174657	1.00135	unchanged
meta_628	Leu-Ala	Amino acid and Its metabolomics	Small Peptide	0.273251	0.0919084	1.0066	unchanged	-1.83359	5.98138e-07	2.09936	down	0.500589	0.127718	1.07262	unchanged
meta_632	Leu-Phe	Amino acid and Its metabolomics	Small Peptide	-0.348534	0.300543	0.751578	unchanged	-1.77999	0.000346527	1.54404	down	1.2684	0.0262788	1.6132	up
meta_638	Gly-His	Amino acid and Its metabolomics	Small Peptide	-0.0132392	0.857451	0.271958	unchanged	-0.429513	1.78546e-06	1.98072	down	-0.154512	0.0785543	1.19033	unchanged
meta_639	Gly-Phe-Phe	Amino acid and Its metabolomics	Small Peptide	0.321569	0.283093	0.600533	unchanged	-0.775856	0.00357461	1.28867	down	0.573088	0.0507603	1.43736	unchanged
meta_640	Ile-Lys	Amino acid and Its metabolomics	Small Peptide	-0.0453806	0.673048	0.320308	unchanged	-0.311767	0.00629203	1.25211	down	-0.262337	0.0516953	1.35023	unchanged
meta_644	Ser-Phe	Amino acid and Its metabolomics	Small Peptide	-0.256399	0.293382	0.581677	unchanged	-1.04581	0.0065546	1.26521	down	0.351599	0.236697	0.835153	unchanged
meta_645	Tyr-Leu	Amino acid and Its metabolomics	Small Peptide	-0.54404	0.0258669	1.24621	down	-0.838565	0.000507935	1.54806	down	0.534583	0.0357456	1.53648	up
meta_663	Ile-Asp	Amino acid and Its metabolomics	Small Peptide	-0.926886	0.00485433	1.24228	down	0.450516	0.220426	0.587563	unchanged	-0.0327643	0.674112	0.30096	unchanged
meta_664	Leu-Leu	Amino acid and Its metabolomics	Small Peptide	0.231956	0.19225	0.842779	unchanged	-1.56267	0.000168283	1.65279	down	0.466241	0.23942	0.801275	unchanged
meta_272	Glycine linoleate	GL	DG	0.286224	0.0638869	1.52036	unchanged	0.379198	0.0236617	1.01552	up	0.0557198	0.54797	0.359018	unchanged
meta_481	PC(8:0/8:0)	GP	PC	-0.26713	0.445064	0.370347	unchanged	0.759582	0.00140179	1.45907	up	-0.0612542	0.988926	0.0815574	unchanged
meta_108	LPA(0:0/16:0)	GP	LPA	0.0467453	0.711572	0.249303	unchanged	1.17007	3.34205e-08	2.37395	up	-0.387087	0.00987501	1.78317	down
meta_339	LPA(16:0/0:0)	GP	LPA	0.0467453	0.711572	0.249303	unchanged	1.17007	3.34205e-08	2.37395	up	-0.387087	0.00987501	1.78317	down
meta_345	LPA(18:1/0:0)	GP	LPA	0.195209	0.102971	0.899766	unchanged	0.493358	0.000813581	1.47414	up	0.0822061	0.28659	0.704792	unchanged
meta_107	LPA(0:0/18:0)	GP	LPC	0.00130388	0.979525	0.0532324	unchanged	1.14613	3.92452e-06	2.10142	up	-0.521945	0.00671944	1.83333	down
meta_428	LPC(17:0/0:0)	GP	LPC	-0.404185	0.00131157	2.13012	down	0.725158	2.42405e-08	2.17984	up	-0.220595	0.0378769	1.41723	down
meta_492	LPC(O-18:0/0:0)	GP	LPC	-0.432027	0.00149595	2.08686	down	0.7358	5.92929e-07	2.11895	up	-0.516094	0.000154881	2.3385	down
meta_496	PC(O-16:0/O-2:0)	GP	PC-O	-0.432027	0.00149595	2.08686	down	0.7358	5.92929e-07	2.11895	up	-0.516094	0.000154881	2.3385	down
meta_514	LPC(20:2/0:0)	GP	LPC	-0.35284	0.0402083	1.40767	down	0.855142	5.6046e-05	1.772	up	-0.32147	0.0393114	1.39252	down
meta_515	LPC(0:0/20:2)	GP	LPC	-0.35284	0.0402083	1.40767	down	0.855142	5.6046e-05	1.772	up	-0.32147	0.0393114	1.39252	down
meta_413	LPC(0:0/14:0)	GP	LPC	-0.294306	0.172187	0.795424	unchanged	0.988871	3.90125e-05	1.88914	up	-0.0805781	0.815071	0.158394	unchanged
meta_522	LPC(18:0/0:0)	GP	LPC	-0.0657312	0.0093351	1.8469	down	0.0111616	0.659401	0.220186	unchanged	-0.0537578	0.0211556	1.59435	down
meta_433	LPC(15:0/0:0)	GP	LPC	-0.379864	0.00445561	1.78841	down	0.866913	7.82937e-06	2.02202	up	-0.232667	0.142317	1.00418	unchanged
meta_597	PC(O-16:0/0:0)	GP	PC-O	-0.349793	0.000909484	1.98988	down	0.76503	4.2342e-07	2.21864	up	-0.374156	0.00382153	1.91594	down
meta_502	PC(O-16:0/O-1:0)	GP	PC-O	0.0776187	0.018312	1.20682	up	-0.163269	9.09173e-06	1.86987	down	0.00471608	0.856807	0.0848514	unchanged
meta_509	LPC(0:0/22:4)	GP	LPC	0.115558	0.287293	0.685115	unchanged	0.756944	0.000375457	1.67576	up	-0.164028	0.396924	0.614926	unchanged
meta_510	LPC(22:4/0:0)	GP	LPC	0.115558	0.287293	0.685115	unchanged	0.756944	0.000375457	1.67576	up	-0.164028	0.396924	0.614926	unchanged
meta_511	LPC(0:0/22:5)	GP	LPC	0.0513269	0.465662	0.715813	unchanged	0.692959	0.0137737	1.15931	up	-0.165904	0.327195	0.666193	unchanged
meta_512	LPC(22:5/0:0)	GP	LPC	-0.015112	0.771574	0.294315	unchanged	0.493998	0.0165018	1.13358	up	-0.0620037	0.866443	0.050344	unchanged
meta_513	LPC(20:1/0:0)	GP	LPC	-0.523103	0.00227981	2.0303	down	0.80569	4.46292e-05	1.79908	up	-0.235613	0.197848	0.842763	unchanged
meta_598	LPC(O-18:1/0:0)	GP	LPC	-0.318369	0.00843984	1.73757	down	0.904446	6.27572e-08	2.27153	up	-0.323503	0.0144723	1.67703	down
meta_599	LPC(O-0:0/18:0)	GP	LPC	-0.432027	0.00149595	2.08686	down	0.7358	5.92929e-07	2.11895	up	-0.516094	0.000154881	2.3385	down
meta_518	LPC(0:0/20:4)	GP	LPC	0.0347984	0.706965	0.374991	unchanged	0.239466	0.00857037	1.19935	up	-0.0366152	0.592763	0.342543	unchanged
meta_519	LPC(20:4/0:0)	GP	LPC	0.0347984	0.706965	0.374991	unchanged	0.239466	0.00857037	1.19935	up	-0.0366152	0.592763	0.342543	unchanged
meta_520	LPC(20:5/0:0)	GP	LPC	-0.082557	0.68257	0.161801	unchanged	0.403698	0.0302749	1.03396	up	0.245389	0.197807	0.966268	unchanged
meta_521	LPC(0:0/20:5)	GP	LPC	-0.179984	0.555332	0.267999	unchanged	0.501855	0.0210424	1.10446	up	0.139928	0.429034	0.605068	unchanged
meta_607	LPC(22:2/0:0)	GP	LPC	-0.345306	0.0918708	1.4525	unchanged	0.641935	0.00193864	1.37721	up	-0.458542	0.00992309	1.72804	down
meta_524	LPC(18:2/0:0)	GP	LPC	0.0378094	0.196431	0.523524	unchanged	-0.208171	2.63966e-07	2.14528	down	0.0361867	0.116647	1.15296	unchanged
meta_527	LPC(0:0/16:0)	GP	LPC	0.0333247	0.222487	0.596312	unchanged	-0.158565	3.83113e-06	1.93276	down	-0.00642266	0.935511	0.070076	unchanged
meta_608	LPC(20:0/0:0)	GP	LPC	-0.580552	0.0121426	1.91366	down	0.708764	0.00500609	1.27195	up	-0.438317	0.013009	1.64264	down
meta_609	LPC(0:0/17:0)	GP	LPC	-0.380446	0.00225682	2.03513	down	0.750456	1.20521e-08	2.20996	up	-0.216146	0.035498	1.43516	down
meta_612	LPC(O-16:1/0:0)	GP	LPC-O	-0.315507	0.00809631	1.74252	down	0.822926	8.77235e-07	2.15067	up	-0.459614	0.000909976	2.18521	down
meta_615	LPC(0:0/18:0)	GP	LPC	-0.0498092	0.0698938	1.50761	unchanged	-0.0454503	0.0460746	0.910996	unchanged	-0.0669465	0.0137582	1.65696	down
meta_606	LPE(15:0/0:0)	GP	LPC	-0.192992	0.338653	0.684738	unchanged	0.585718	0.035058	1.04366	up	0.334665	0.236684	0.916431	unchanged
meta_610	LPC(0:0/15:0)	GP	LPC	-0.437822	0.0117848	1.62254	down	0.961156	3.48828e-05	1.91036	up	-0.205673	0.27084	0.724759	unchanged
meta_611	LPC(12:0/0:0)	GP	LPC	-0.440091	0.0898685	1.1501	unchanged	0.805021	0.0182892	1.17067	up	0.337709	0.319645	0.766972	unchanged
meta_613	LPC(18:4/0:0)	GP	LPC	-0.752297	0.00548105	1.80193	down	1.38193	1.27492e-05	1.97085	up	-0.538606	0.165208	0.96444	unchanged
meta_616	LPC(0:0/18:1)	GP	LPC	-0.0597508	0.356269	0.68972	unchanged	0.138133	0.0223093	1.04462	up	0.00659892	0.875966	0.131152	unchanged
meta_617	LPC(0:0/20:1)	GP	LPC	-0.419677	0.00198655	2.02323	down	0.45596	0.00215498	1.36004	up	-0.0168297	0.980437	0.0320782	unchanged
meta_631	LPC(13:0/0:0)	GP	LPC	-0.281625	0.156528	0.971079	unchanged	0.950126	0.00136651	1.54983	up	-0.0181414	0.899867	0.0120102	unchanged
meta_649	LPC(16:2/0:0)	GP	LPC	-0.608296	0.00275709	1.98118	down	1.05604	0.000521533	1.59291	up	-0.592886	0.105855	1.1662	unchanged
meta_102	LPG(18:1/0:0)	GP	LPG	0.0128353	0.759117	0.0308906	unchanged	0.542837	3.3613e-06	2.00501	up	-0.314369	0.00166996	2.09527	down
meta_101	LPS(22:6/0:0)	GP	LPS	-0.299241	0.0587178	1.41568	unchanged	1.00325	1.33072e-07	2.16856	up	-0.251198	0.0873641	1.20579	unchanged
meta_252	LPS(16:2/0:0)	GP	LPS	0.0636109	0.44913	0.174362	unchanged	0.650432	7.35606e-05	1.66657	up	-0.0649876	0.743703	0.302664	unchanged
meta_104	LPE(18:0/0:0)	GP	LPE	0.0940563	0.401499	0.684008	unchanged	0.689115	0.00253187	1.36889	up	0.0703656	0.413072	0.544529	unchanged
meta_105	LPE(16:0/0:0)	GP	LPE	0.200553	0.189788	0.961359	unchanged	0.731845	0.000557929	1.55354	up	0.182701	0.167761	0.97555	unchanged
meta_106	LPE(14:0/0:0)	GP	LPE	-0.0177321	0.870634	0.249745	unchanged	0.745162	0.00771697	1.27777	up	0.387321	0.0746283	1.29097	unchanged
meta_253	LPE(0:0/22:4)	GP	LPE	0.664838	0.00273702	1.89408	up	0.226816	0.325944	0.530129	unchanged	0.375353	0.126834	1.07603	unchanged
meta_254	LPE(22:4/0:0)	GP	LPE	0.664838	0.00273702	1.89408	up	0.226816	0.325944	0.530129	unchanged	0.375353	0.126834	1.07603	unchanged
meta_255	LPE(0:0/22:5)	GP	LPE	0.567446	0.02109	1.65983	up	0.178143	0.547622	0.325979	unchanged	0.386291	0.146924	1.03291	unchanged
meta_256	LPE(22:5/0:0)	GP	LPE	0.567446	0.02109	1.65983	up	0.178143	0.547622	0.325979	unchanged	0.386291	0.146924	1.03291	unchanged
meta_257	LPE(0:0/22:6)	GP	LPE	0.272222	0.0366758	1.65436	up	0.304798	0.0894655	0.838791	unchanged	0.234244	0.216695	0.865968	unchanged
meta_258	LPE(22:6/0:0)	GP	LPE	0.272222	0.0366758	1.65436	up	0.304798	0.0894655	0.838791	unchanged	0.234244	0.216695	0.865968	unchanged
meta_266	LPE(0:0/18:0)	GP	LPE	0.0940563	0.401499	0.684008	unchanged	0.689115	0.00253187	1.36889	up	0.0703656	0.413072	0.544529	unchanged
meta_270	LPE(0:0/16:0)	GP	LPE	0.200553	0.189788	0.961359	unchanged	0.731845	0.000557929	1.55354	up	0.182701	0.167761	0.97555	unchanged
meta_271	LPE(0:0/16:1)	GP	LPE	0.781318	0.0059356	1.84115	up	0.107846	0.669952	0.272147	unchanged	0.517746	0.11406	1.09146	unchanged
meta_338	Phosphatidylethanolamine lyso alkenyl 16:0	GP	LPE	0.0191842	0.827945	0.0735912	unchanged	0.733512	1.29882e-07	2.13747	up	-0.0377852	0.628968	0.352132	unchanged
meta_356	Phosphatidylethanolamine lyso alkenyl 18:2	GP	LPE	0.000341401	0.615499	0.222948	unchanged	0.71871	0.01554	1.09356	up	0.00185126	0.85368	0.197143	unchanged
meta_452	LPE(16:1/0:0)	GP	LPE	0.480676	0.0353282	1.45287	up	0.0639717	0.6912	0.260573	unchanged	0.467594	0.188194	0.918144	unchanged
meta_103	LPE(18:1/0:0)	GP	LPE	0.280951	0.184009	0.900132	unchanged	0.432202	0.361631	0.410691	unchanged	0.426286	0.0107173	1.79202	up
meta_263	LPE(20:4/0:0)	GP	LPE	0.333952	0.0221647	1.65265	up	-0.020119	0.651384	0.201419	unchanged	0.362127	0.00479444	1.89975	up
meta_267	LPE(0:0/18:2)	GP	LPE	0.325678	0.0344632	1.28118	up	-0.0652299	0.541038	0.293504	unchanged	0.302473	0.0470127	1.3844	up
meta_313	Glycerophospho-N-Arachidonoyl Ethanolamine	GP	LPE	0.322205	0.023364	1.62885	up	0.0138017	0.837897	0.0870183	unchanged	0.361918	0.00616308	1.85697	up
meta_642	LPE(17:1/0:0)	GP	LPE	-0.080095	0.968078	0.0378653	unchanged	0.252444	0.609614	0.293966	unchanged	0.588009	0.0236625	1.59122	up
meta_650	LPE(18:2/0:0)	GP	LPE	0.0734724	0.565874	0.257564	unchanged	-0.171896	0.229262	0.561462	unchanged	0.319122	0.0441044	1.40593	up
meta_111	FFA(16:1)	FA	FFA	0.710268	0.00179569	2.29557	up	0.291324	0.354591	0.461221	unchanged	-0.0612421	0.926279	0.177833	unchanged
meta_112	FFA(16:0)	FA	FFA	0.476582	1.73596e-07	3.15339	up	0.0887376	0.18814	0.624328	unchanged	0.0589498	0.304285	0.628516	unchanged
meta_113	FFA(18:2)	FA	FFA	0.411155	2.76206e-05	2.70602	up	0.186279	0.0510639	0.880833	unchanged	-0.0601728	0.689865	0.400329	unchanged
meta_117	FFA(20:2)	FA	FFA	0.212769	0.0812023	1.64074	unchanged	0.629053	0.0014337	1.44227	up	0.278276	0.0853887	1.18118	unchanged
meta_118	FFA(10:0)	FA	FFA	0.397927	0.0446932	1.68279	up	0.285119	0.383573	0.402298	unchanged	0.0945633	0.445798	0.547692	unchanged
meta_242	FFA(20:4)	FA	FFA	0.388952	0.00143837	2.34383	up	0.428821	0.00225059	1.36307	up	-0.329242	0.00519835	1.95638	down
meta_135	8,15-Dihete	FA	FFA	0.697601	0.00729466	2.02945	up	0.11905	0.959132	0.00302877	unchanged	-0.223721	0.47112	0.58838	unchanged
meta_150	Tetradecanedioic acid	FA	FFA	0.518508	0.0305118	1.93336	up	0.295159	0.536764	0.256688	unchanged	0.392203	0.0647124	1.24849	unchanged
meta_191	FFA(14:0)	FA	FFA	0.397359	0.0134728	1.92119	up	0.383095	0.0831266	0.852601	unchanged	0.0500778	0.55245	0.377108	unchanged
meta_194	FFA(9:0)	FA	FFA	0.155937	0.0425832	1.30154	up	-0.237224	0.0738567	0.910563	unchanged	-0.00114445	0.810571	0.207067	unchanged
meta_224	FFA(22:6)	FA	FFA	0.126068	0.335309	1.11125	unchanged	0.672321	0.00141753	1.45216	up	-0.29102	0.213658	0.956031	unchanged
meta_230	16-Hydroxyhexadecanoic acid	FA	FFA	0.254215	0.0119036	1.90881	up	0.403769	0.000330178	1.55862	up	-0.0425763	0.676785	0.378023	unchanged
meta_237	DL-2-hydroxystearic acid	FA	FFA	0.157122	0.0815359	1.29089	unchanged	0.480851	0.000178743	1.6238	up	-0.0545803	0.69749	0.384619	unchanged
meta_239	2-hydroxyhexadecanoic acid	FA	FFA	0.254215	0.0119036	1.90881	up	0.403769	0.000330178	1.55862	up	-0.0425763	0.676785	0.378023	unchanged
meta_287	12-Hydroxyoctadecanoic acid	FA	FFA	0.397888	0.0123365	1.95376	up	0.905925	0.00357859	1.42121	up	-0.0554503	0.763202	0.27625	unchanged
meta_314	FFA(16:2)	FA	FFA	0.444523	0.00102652	1.94983	up	-0.422803	0.000122148	1.62984	down	0.166728	0.132982	1.01534	unchanged
meta_286	Tridecanedioic acid	FA	FFA	0.274045	6.5833e-05	2.27311	up	-0.00637259	0.958198	0.00253635	unchanged	0.212205	0.012455	1.69271	up
meta_100	(±)15-HETE	FA	Oxidized lipids	-0.248978	0.361071	0.568699	unchanged	0.743377	0.0158683	1.18163	up	-0.161071	0.486334	0.47161	unchanged
meta_119	AA	FA	Oxidized lipids	0.340217	0.00266325	2.29161	up	0.398494	0.00266617	1.33202	up	-0.311439	0.00532591	1.94971	down
meta_116	DHA	FA	Oxidized lipids	0.126068	0.335309	1.11125	unchanged	0.672321	0.00141753	1.45216	up	-0.29102	0.213658	0.956031	unchanged
meta_167	(±)12-HEPE	FA	Oxidized lipids	-0.639063	0.0670382	1.00629	unchanged	1.02746	0.00295123	1.35932	up	0.0518844	0.457453	0.541157	unchanged
meta_169	(±)15-HEPE	FA	Oxidized lipids	-0.639063	0.0670382	1.00629	unchanged	1.02746	0.00295123	1.35932	up	0.0518844	0.457453	0.541157	unchanged
meta_172	(±)18-HEPE	FA	Oxidized lipids	-0.639063	0.0670382	1.00629	unchanged	1.02746	0.00295123	1.35932	up	0.0518844	0.457453	0.541157	unchanged
meta_174	(±)4-HDHA	FA	Oxidized lipids	0.280924	0.162983	1.09481	unchanged	0.603245	0.00225824	1.44505	up	-0.181832	0.300734	0.715683	unchanged
meta_178	11,12-EET	FA	Oxidized lipids	-0.142959	0.695376	0.034744	unchanged	0.643784	0.027332	1.10452	up	-0.507463	0.1433	1.02212	unchanged
meta_181	14(S)-HDHA	FA	Oxidized lipids	-0.442424	0.131652	0.898253	unchanged	0.721729	0.0138848	1.17486	up	0.00660652	0.656291	0.331299	unchanged
meta_182	15-oxoETE	FA	Oxidized lipids	0.0835111	0.747122	0.147457	unchanged	0.530127	0.0383596	1.02058	up	-0.266755	0.1689	1.01808	unchanged
meta_183	19(S)-HETE	FA	Oxidized lipids	-0.00385674	0.905419	0.267182	unchanged	0.828679	0.000414824	1.66577	up	-0.313236	0.556997	0.448537	unchanged
meta_184	20-HETE	FA	Oxidized lipids	-0.00385674	0.905419	0.267182	unchanged	0.828679	0.000414824	1.66577	up	-0.313236	0.556997	0.448537	unchanged
meta_186	5,6-DiHETrE	FA	Oxidized lipids	0.216642	0.180036	1.24753	unchanged	0.697935	0.00229283	1.4405	up	-0.336779	0.115813	1.13944	unchanged
meta_187	5-HETrE	FA	Oxidized lipids	-0.192197	0.701279	0.0659882	unchanged	0.792928	0.0127375	1.20392	up	-0.138376	0.544174	0.419838	unchanged
meta_290	12-HHT	FA	Oxidized lipids	-0.328214	0.627335	0.571898	unchanged	1.08855	0.0567059	0.975886	unchanged	-2.29309	0.024257	1.56087	down
meta_294	8(S)-HETrE	FA	Oxidized lipids	-0.192197	0.701279	0.0659882	unchanged	0.792928	0.0127375	1.20392	up	-0.138376	0.544174	0.419838	unchanged
meta_295	15(S)-HETrE	FA	Oxidized lipids	-0.192197	0.701279	0.0659882	unchanged	0.792928	0.0127375	1.20392	up	-0.138376	0.544174	0.419838	unchanged
meta_298	(±)8(9)-DiHET	FA	Oxidized lipids	0.472533	0.00202605	2.25785	up	0.235115	0.213628	0.564562	unchanged	-0.0364726	0.968977	0.0629503	unchanged
meta_299	(±)11(12)-DiHET	FA	Oxidized lipids	0.472533	0.00202605	2.25785	up	0.235115	0.213628	0.564562	unchanged	-0.0364726	0.968977	0.0629503	unchanged
meta_300	10-HDoHE	FA	Oxidized lipids	-0.410291	0.132662	0.930459	unchanged	0.816587	0.00646232	1.31414	up	-0.0526924	0.876639	0.128795	unchanged
meta_301	8-HDoHE	FA	Oxidized lipids	-0.445764	0.121422	0.936192	unchanged	0.686233	0.0199951	1.11542	up	-0.0700271	0.823456	0.173543	unchanged
meta_302	11-HDoHE	FA	Oxidized lipids	-0.489102	0.0739562	1.05238	unchanged	0.641571	0.0232592	1.08814	up	0.0195113	0.602001	0.395535	unchanged
meta_303	16-HDoHE	FA	Oxidized lipids	-0.552858	0.0600423	1.15651	unchanged	0.883516	0.0044672	1.36402	up	-0.083767	0.973913	0.0489629	unchanged
meta_304	20-HDoHE	FA	Oxidized lipids	-0.7819	0.0348818	1.28462	down	1.52148	6.07224e-05	1.86936	up	-0.0998813	0.543925	0.36133	unchanged
meta_439	DL-Carnitine	FA	CAR	0.27316	0.00824999	1.42345	up	-0.528757	1.20138e-05	1.80913	down	0.190568	0.157252	1.04306	unchanged
meta_528	Carnitine C24:2	FA	CAR	-0.469066	0.041986	1.46191	down	0.773116	0.00112937	1.50065	up	-0.421913	0.0109506	1.66177	down
meta_532	Carnitine ph-C14	FA	CAR	-0.332208	0.120153	0.879399	unchanged	0.605218	0.0205545	1.12181	up	-0.286574	0.273906	0.773023	unchanged
meta_537	Carnitine C15:DC	FA	CAR	0.0775794	0.694443	0.468126	unchanged	0.327214	0.0299437	1.07365	up	-0.00251	0.846081	0.15903	unchanged
meta_588	Carnitine C12:3	FA	CAR	-0.713384	0.0107882	1.26849	down	-0.214358	0.199749	0.605708	unchanged	0.050854	0.975239	0.00256776	unchanged
meta_530	Carnitine C20-OH	FA	CAR	-0.0678504	0.522114	0.375944	unchanged	-0.0353691	0.81569	0.113164	unchanged	0.452974	0.0186667	1.66565	up
meta_591	Carnitine C22:6	FA	CAR	-0.19646	0.215267	0.517158	unchanged	0.241987	0.186525	0.629233	unchanged	0.388708	0.0432948	1.43279	up
meta_132	D-Fructose 6-Phosphate-Disodium Salt	Carboxylic acids and derivatives	Phosphate sugars	0.0908978	0.433927	0.382213	unchanged	0.606877	0.00373401	1.3496	up	0.973961	0.00187816	2.11239	up
meta_137	Ribulose-5-Phosphate	Carboxylic acids and derivatives	Phosphate sugars	0.213789	0.0311254	1.13732	up	0.712149	0.0247154	1.15101	up	-0.629101	0.0320165	1.51515	down
meta_139	2-Deoxyribose 1-Phosphate	Carboxylic acids and derivatives	Phosphate sugars	-0.171938	0.30358	0.436692	unchanged	0.490566	0.000230524	1.63014	up	0.0483014	0.48888	0.467367	unchanged
meta_155	D-Xylulose 5-phosphate	Carboxylic acids and derivatives	Phosphate sugars	0.213789	0.0311254	1.13732	up	0.712149	0.0247154	1.15101	up	-0.629101	0.0320165	1.51515	down
meta_200	D-Glucosamine 6-Phosphate	Carboxylic acids and derivatives	Phosphate sugars	0.21872	0.0219062	1.23902	up	-0.344024	0.00129083	1.42343	down	0.0906187	0.386153	0.682253	unchanged
meta_246	D-Mannose 6-phosphate	Carboxylic acids and derivatives	Phosphate sugars	0.235377	0.0874881	1.13701	unchanged	-0.179374	0.586238	0.302946	unchanged	1.24468	0.000274967	2.38251	up
meta_309	Sorbitol 6-phosphate	Carboxylic acids and derivatives	Phosphate sugars	-0.0602195	0.634714	0.0155563	unchanged	-0.282177	0.0345012	1.00565	down	-0.0943914	0.686381	0.376738	unchanged
meta_52	1,5-Anhydro-D-Glucitol	Carboxylic acids and derivatives	Sugar alcohols	0.270266	0.249359	1.19302	unchanged	0.0332393	0.718556	0.191989	unchanged	0.582511	0.0325367	1.51714	up
meta_161	Maltitol	Carboxylic acids and derivatives	Sugar alcohols	0.601761	0.00326182	1.66266	up	-0.423401	0.0389793	0.939411	unchanged	0.71425	0.00217327	2.14118	up
meta_192	Myoinositol	Carboxylic acids and derivatives	Sugar alcohols	0.439008	9.35437e-05	1.9263	up	-0.0774333	0.671615	0.220904	unchanged	0.697285	0.000116905	2.54871	up
meta_54	D-Glucose	Carboxylic acids and derivatives	Sugars	0.439008	9.35437e-05	1.9263	up	-0.0774333	0.671615	0.220904	unchanged	0.697285	0.000116905	2.54871	up
meta_55	D-Mannose	Carboxylic acids and derivatives	Sugars	0.439008	9.35437e-05	1.9263	up	-0.0774333	0.671615	0.220904	unchanged	0.697285	0.000116905	2.54871	up
meta_56	D-Trehalose	Carboxylic acids and derivatives	Sugars	0.186186	0.0345263	1.07052	up	-0.322213	0.00136782	1.40992	down	0.138476	0.0986242	1.21574	unchanged
meta_57	Lactose	Carboxylic acids and derivatives	Sugars	0.186186	0.0345263	1.07052	up	-0.322213	0.00136782	1.40992	down	0.138476	0.0986242	1.21574	unchanged
meta_58	Lactulose	Carboxylic acids and derivatives	Sugars	0.186186	0.0345263	1.07052	up	-0.322213	0.00136782	1.40992	down	0.138476	0.0986242	1.21574	unchanged
meta_59	L-Fucose	Carboxylic acids and derivatives	Sugars	0.270266	0.249359	1.19302	unchanged	0.0332393	0.718556	0.191989	unchanged	0.582511	0.0325367	1.51714	up
meta_60	L-Rhamnose	Carboxylic acids and derivatives	Sugars	0.270266	0.249359	1.19302	unchanged	0.0332393	0.718556	0.191989	unchanged	0.582511	0.0325367	1.51714	up
meta_61	Maltose	Carboxylic acids and derivatives	Sugars	0.186186	0.0345263	1.07052	up	-0.322213	0.00136782	1.40992	down	0.138476	0.0986242	1.21574	unchanged
meta_145	L-Erythrulose	Carboxylic acids and derivatives	Sugars	-0.330433	0.223454	0.788497	unchanged	0.589899	0.00755408	1.26238	up	0.00822696	0.90138	0.0207213	unchanged
meta_229	1,6-anhydro-β-D-glucose	Carboxylic acids and derivatives	Sugars	0.444533	0.00363807	1.66376	up	-0.134217	0.682253	0.21732	unchanged	1.01188	0.000109282	2.53807	up
meta_235	Erythrose	Carboxylic acids and derivatives	Sugars	-0.330433	0.223454	0.788497	unchanged	0.589899	0.00755408	1.26238	up	0.00822696	0.90138	0.0207213	unchanged
meta_327	D-Tagatose	Carboxylic acids and derivatives	Sugars	0.439008	9.35437e-05	1.9263	up	-0.0774333	0.671615	0.220904	unchanged	0.697285	0.000116905	2.54871	up
meta_346	D-Allose	Carboxylic acids and derivatives	Sugars	0.439008	9.35437e-05	1.9263	up	-0.0774333	0.671615	0.220904	unchanged	0.697285	0.000116905	2.54871	up
meta_373	N-Acetylmannosamine	Carboxylic acids and derivatives	Sugars	0.264915	0.15914	0.784925	unchanged	-0.736999	0.00944697	1.23193	down	0.47266	0.185005	1.05522	unchanged
meta_396	D-Fructose	Carboxylic acids and derivatives	Sugars	-0.000126356	0.927607	0.120128	unchanged	-0.483604	5.52916e-07	2.10077	down	0.0254248	0.617811	0.397251	unchanged
meta_636	alpha-D-Glucopyranoside, beta-D-fructofuranosyl	Carboxylic acids and derivatives	Sugars	0.728334	0.00586216	1.39616	up	-0.774783	0.00499361	1.2557	down	1.5501	0.000745912	2.37685	up
meta_62	D-Glucoronic Acid	Carboxylic acids and derivatives	Sugar acids	0.277759	0.0905085	1.00177	unchanged	0.342601	0.0632157	0.887805	unchanged	0.786823	0.000101293	2.5113	up
meta_326	D-Galacturonic Acid	Carboxylic acids and derivatives	Sugar acids	0.277759	0.0905085	1.00177	unchanged	0.342601	0.0632157	0.887805	unchanged	0.786823	0.000101293	2.5113	up
meta_397	D-Gluconic Acid	Carboxylic acids and derivatives	Sugar acids	0.0832421	0.0995708	0.777906	unchanged	-0.354609	1.49506e-06	2.04438	down	0.00983052	0.763561	0.247256	unchanged
meta_627	D-Glucosaminic acid	Carboxylic acids and derivatives	Sugar acids	-0.440414	0.00123693	1.97248	down	-0.279166	0.0306189	0.969697	unchanged	-0.399101	0.00729058	1.80048	down
meta_504	2,4-diacetamino-2,4,6-triphenoxy-D-mannopyranose	Carboxylic acids and derivatives	Sugar derivatives	-0.33585	0.0296389	1.06736	down	-0.153043	0.986187	0.0108884	unchanged	0.256395	0.42831	0.561486	unchanged
meta_49	α-Ketoglutaric Acid（α-KG）	Organic acid And Its derivatives	Organic acid And Its derivatives	0.200262	0.331157	0.897893	unchanged	2.24073	0.000451053	1.77315	up	-1.25173	0.0028698	2.12352	down
meta_50	Pyruvic Acid	Organic acid And Its derivatives	Organic acid And Its derivatives	-0.0478983	0.416825	0.545833	unchanged	0.451561	0.0182918	1.1742	up	-0.597436	0.0814909	1.23295	unchanged
meta_51	Citramalic Acid	Organic acid And Its derivatives	Organic acid And Its derivatives	0.204995	0.581274	0.782915	unchanged	0.962992	0.00048832	1.66359	up	-0.378567	0.0491972	1.36539	down
meta_76	3-Hydroxy-3-Methyl Butyric Acid	Organic acid And Its derivatives	Organic acid And Its derivatives	-0.0380456	0.985517	0.397359	unchanged	0.113934	0.522505	0.306286	unchanged	0.391982	0.0344255	1.5434	up
meta_80	4-Hydroxy-2-Oxoglutaric Acid	Organic acid And Its derivatives	Organic acid And Its derivatives	0.0333215	0.824534	0.438785	unchanged	0.380773	0.0117873	1.1738	up	0.131868	0.329334	0.763119	unchanged
meta_83	Caffeic Acid	Organic acid And Its derivatives	Organic acid And Its derivatives	-0.390156	0.0777822	1.30186	unchanged	0.65389	0.0339827	1.05778	up	-0.115317	0.559696	0.525482	unchanged
meta_91	L-Homoserine	Organic acid And Its derivatives	Organic acid And Its derivatives	0.0733587	0.436428	0.695101	unchanged	-0.208287	0.0444715	0.94244	unchanged	-0.547652	0.000258329	2.33081	down
meta_93	Mandelic Acid	Organic acid And Its derivatives	Organic acid And Its derivatives	-0.104124	0.609448	0.102159	unchanged	-0.139944	0.189999	0.617577	unchanged	0.851471	0.0411123	1.40381	up
meta_94	Methylmalonic Acid	Organic acid And Its derivatives	Organic acid And Its derivatives	0.0271983	0.522719	0.649204	unchanged	0.496202	0.00073731	1.58461	up	-0.362967	0.00254298	2.08701	down
meta_98	Subericacid	Organic acid And Its derivatives	Organic acid And Its derivatives	0.278349	0.00696044	1.77145	up	0.265419	0.244951	0.561286	unchanged	-0.0467288	0.453446	0.654817	unchanged
meta_133	Aminomalonic Acid	Organic acid And Its derivatives	Organic acid And Its derivatives	0.0331161	0.489893	0.642827	unchanged	0.478547	0.000655404	1.56867	up	-0.359341	0.00214208	2.09254	down
meta_134	3-Methyl-2-Oxobutanoic Acid	Organic acid And Its derivatives	Organic acid And Its derivatives	-0.00923478	0.780895	0.324746	unchanged	0.603997	0.000168318	1.70488	up	-0.13994	0.24113	0.755658	unchanged
meta_143	Hydroxyphenyllactic acid	Organic acid And Its derivatives	Organic acid And Its derivatives	0.266614	0.112714	1.2187	unchanged	0.945777	3.93067e-05	1.79931	up	0.0258761	0.772548	0.123321	unchanged
meta_149	D-Malic acid	Organic acid And Its derivatives	Organic acid And Its derivatives	0.312614	0.0941422	1.10636	unchanged	-0.0302359	0.784212	0.113575	unchanged	0.723742	0.00393173	2.03914	up
meta_153	Porphobilinogen	Organic acid And Its derivatives	Organic acid And Its derivatives	0.0159987	0.678076	0.149965	unchanged	-0.0981419	0.246079	0.520483	unchanged	0.243365	0.00238948	2.00323	up
meta_160	2,5-Furandicarboxylicacid	Organic acid And Its derivatives	Organic acid And Its derivatives	-0.033284	0.744149	0.262969	unchanged	-0.198408	0.00609926	1.23515	down	0.165329	0.00417752	2.00739	up
meta_201	3-Dehydroshikimate	Organic acid And Its derivatives	Organic acid And Its derivatives	0.280649	0.0796445	1.08422	unchanged	-0.982785	0.000831752	1.52111	down	0.641495	0.00337244	2.00223	up
meta_208	Uric acid	Organic acid And Its derivatives	Organic acid And Its derivatives	-0.282942	0.996491	0.181317	unchanged	1.66455	0.00475215	1.3601	up	-0.310762	0.235819	0.96901	unchanged
meta_210	3-hydroxyphenylacetic acid	Organic acid And Its derivatives	Organic acid And Its derivatives	-0.0238156	0.813143	0.208336	unchanged	-0.780635	0.00169925	1.36562	down	-0.311119	0.358575	0.635254	unchanged
meta_216	2-Hydroxyglutaric acid	Organic acid And Its derivatives	Organic acid And Its derivatives	0.204995	0.581274	0.782915	unchanged	0.962992	0.00048832	1.66359	up	-0.378567	0.0491972	1.36539	down
meta_217	Iminodiacetic acid	Organic acid And Its derivatives	Organic acid And Its derivatives	0.0200949	0.767842	0.0961028	unchanged	-0.720453	3.22743e-05	1.82923	down	0.430385	0.0145841	1.66308	up
meta_241	4-Methyl-2-oxovaleric acid	Organic acid And Its derivatives	Organic acid And Its derivatives	-0.224761	0.190893	0.592249	unchanged	0.42583	0.0168548	1.21648	up	-0.154059	0.432444	0.468517	unchanged
meta_279	2-Methyl-4-pentenoic Acid	Organic acid And Its derivatives	Organic acid And Its derivatives	-0.19688	0.00486026	1.88599	down	-0.291822	0.00021892	1.58566	down	0.392903	3.55027e-08	3.22199	up
meta_283	3-Hydroxybenzoic Acid	Organic acid And Its derivatives	Organic acid And Its derivatives	0.14298	0.203022	0.77918	unchanged	-0.394862	0.016007	1.11405	down	0.135827	0.514919	0.478453	unchanged
meta_284	8-Aminooctanoic Acid	Organic acid And Its derivatives	Organic acid And Its derivatives	0.0258525	0.506959	0.571499	unchanged	-0.0290867	0.604616	0.229781	unchanged	-0.133774	0.0199613	1.52609	down
meta_318	2-Hydroxyadipic acid	Organic acid And Its derivatives	Organic acid And Its derivatives	0.240889	0.324811	1.07809	unchanged	-0.00249346	0.617521	0.256966	unchanged	0.500467	0.0396436	1.43022	up
meta_341	3-hydroxy-tetradecanoic acid	Organic acid And Its derivatives	Organic acid And Its derivatives	0.212712	0.354836	1.03668	unchanged	0.767451	0.00715986	1.24389	up	0.223892	0.294973	0.723193	unchanged
meta_403	4-Guanidinobutyric Acid	Organic acid And Its derivatives	Organic acid And Its derivatives	-0.0516361	0.969602	0.157578	unchanged	-0.670248	0.00106806	1.44696	down	0.00398658	0.975049	0.00652039	unchanged
meta_408	Guanidineacetic Acid	Organic acid And Its derivatives	Organic acid And Its derivatives	0.0654143	0.71813	0.284499	unchanged	-0.0656887	0.624707	0.26927	unchanged	-0.387995	0.00717457	1.78218	down
meta_409	Hippuric Acid	Organic acid And Its derivatives	Organic acid And Its derivatives	-0.995007	0.0314608	1.55385	down	1.21557	0.0216964	1.13834	up	-0.402113	0.455538	0.64439	unchanged
meta_423	D-piperidine acid	Organic acid And Its derivatives	Organic acid And Its derivatives	-0.371713	0.0455485	1.31559	down	0.712616	0.00571992	1.28002	up	-0.672253	0.00720427	1.90646	down
meta_491	3-Carboxypropyltrimethylammonium	Organic acid And Its derivatives	Organic acid And Its derivatives	0.0664226	0.636978	0.13955	unchanged	-0.692884	0.00354626	1.31033	down	0.213946	0.310437	0.785578	unchanged
meta_573	SDMA	Organic acid And Its derivatives	Organic acid And Its derivatives	0.0451384	0.759009	0.237742	unchanged	-0.140018	0.322605	0.480695	unchanged	0.382173	0.00936172	1.72962	up
meta_635	Stachydrine	Organic acid And Its derivatives	Organic acid And Its derivatives	-1.02014	0.0111694	1.64427	down	-0.415251	0.793677	0.100881	unchanged	-0.13959	0.996887	0.0833012	unchanged
meta_148	Glycerophosphoric acid	Organic acid And Its derivatives	Phosphoric acids	0.183679	0.231845	0.602096	unchanged	1.44502	0.000587539	1.7019	up	-1.05219	0.00281088	2.06091	down
meta_86	Guanidinoethyl Sulfonate	Organic acid And Its derivatives	Sulfonic acids	0.108002	0.0859439	1.09501	unchanged	-0.266619	0.000204303	1.6262	down	0.108555	0.105568	1.0999	unchanged
meta_38	5-Methylcytosine	Nucleotide And Its metabolomics	Nucleotide and Its metabolomics	0.334946	6.06344e-05	2.15876	up	-0.272655	0.00112996	1.47571	down	0.222156	0.0171072	1.63299	up
meta_43	Hypoxanthine	Nucleotide And Its metabolomics	Nucleotide and Its metabolomics	-0.225125	0.341011	0.579376	unchanged	-0.662656	0.0108351	1.16642	down	0.249062	0.15768	0.972442	unchanged
meta_44	Uridine	Nucleotide And Its metabolomics	Nucleotide and Its metabolomics	-0.24314	0.0617776	0.882066	unchanged	0.355449	0.00851152	1.20627	up	-0.018038	0.952917	0.00882295	unchanged
meta_45	Β-Nicotinamide Mononucleotide	Nucleotide And Its metabolomics	Nucleotide and Its metabolomics	0.2182	0.0337476	1.46624	up	-0.119939	0.178286	0.636633	unchanged	0.0768848	0.391956	0.599307	unchanged
meta_123	N6-Succinyl Adenosine	Nucleotide And Its metabolomics	Nucleotide and Its metabolomics	0.255209	0.150915	0.95536	unchanged	0.689761	0.013487	1.22473	up	0.0224448	0.999357	0.103071	unchanged
meta_125	2-(Dimethylamino)Guanosine	Nucleotide And Its metabolomics	Nucleotide and Its metabolomics	-0.0646996	0.550973	0.17895	unchanged	0.431347	0.000407603	1.58702	up	0.0506418	0.545018	0.32685	unchanged
meta_129	2'-Deoxycytidine-5'-Monophosphate	Nucleotide And Its metabolomics	Nucleotide and Its metabolomics	-0.110492	0.486422	0.170331	unchanged	0.56685	0.000920066	1.53472	up	-0.440707	0.00725634	1.93443	down
meta_206	Inosine	Nucleotide And Its metabolomics	Nucleotide and Its metabolomics	0.130332	0.435264	0.417535	unchanged	-4.43424	3.13758e-05	1.79376	down	2.51712	0.042152	1.43925	up
meta_212	7-Methylguanine	Nucleotide And Its metabolomics	Nucleotide and Its metabolomics	-0.0242916	0.663673	0.135502	unchanged	0.275871	0.0109185	1.16351	up	0.0463726	0.578871	0.300885	unchanged
meta_215	2-Amino-4,6-pteridinediol	Nucleotide And Its metabolomics	Nucleotide and Its metabolomics	-0.223694	0.703508	0.0750476	unchanged	1.05127	0.000424599	1.59851	up	-0.119097	0.857335	0.181798	unchanged
meta_323	5-Hydroxy-2'-deoxyuridine	Nucleotide And Its metabolomics	Nucleotide and Its metabolomics	-0.24314	0.0617776	0.882066	unchanged	0.355449	0.00851152	1.20627	up	-0.018038	0.952917	0.00882295	unchanged
meta_337	Xanthosine-5'-monophosphate	Nucleotide And Its metabolomics	Nucleotide and Its metabolomics	0.0916314	0.531169	0.245455	unchanged	-0.733968	0.00141878	1.46996	down	0.156937	0.207752	0.821925	unchanged
meta_350	2-Deoxyribose-5'-phosphate	Nucleotide And Its metabolomics	Nucleotide and Its metabolomics	0.128706	0.205337	1.06774	unchanged	-0.0892331	0.436741	0.357853	unchanged	0.276214	0.0151723	1.6615	up
meta_386	2-Hydroxy-6-Aminopurine	Nucleotide And Its metabolomics	Nucleotide and Its metabolomics	-0.3076	0.294657	0.72279	unchanged	-2.38188	0.000396451	1.53855	down	0.810399	0.292076	0.753006	unchanged
meta_389	Adenosine	Nucleotide And Its metabolomics	Nucleotide and Its metabolomics	-0.216337	0.6776	0.125912	unchanged	-0.825296	0.0124299	1.15706	down	0.635154	0.0467276	1.51305	up
meta_391	Deoxyguanosine	Nucleotide And Its metabolomics	Nucleotide and Its metabolomics	-0.216337	0.6776	0.125912	unchanged	-0.825296	0.0124299	1.15706	down	0.635154	0.0467276	1.51305	up
meta_392	Guanosine	Nucleotide And Its metabolomics	Nucleotide and Its metabolomics	0.109821	0.84853	0.218096	unchanged	-3.19457	1.39798e-05	1.8212	down	0.574314	0.132162	1.07341	unchanged
meta_395	Uracil	Nucleotide And Its metabolomics	Nucleotide and Its metabolomics	-0.32267	0.00372337	1.66822	down	0.173933	0.149988	0.641527	unchanged	-0.165484	0.14455	0.913279	unchanged
meta_424	5'-Deoxy-5'-(Methylthio) Adenosine	Nucleotide And Its metabolomics	Nucleotide and Its metabolomics	0.404455	0.0390709	1.38527	up	-0.794363	0.000189425	1.58962	down	0.448782	0.0257208	1.54921	up
meta_467	Phosphocholine	Nucleotide And Its metabolomics	Nucleotide and Its metabolomics	-0.0105329	0.724271	0.223755	unchanged	-0.296383	0.0129828	1.25074	down	0.285725	0.0242548	1.51317	up
meta_486	Allopurinol	Nucleotide And Its metabolomics	Nucleotide and Its metabolomics	-0.112294	0.179073	0.791054	unchanged	-4.94383	3.36288e-05	1.77947	down	2.99624	0.0568962	1.35532	unchanged
meta_488	2-Aminomethylpyrimidine	Nucleotide And Its metabolomics	Nucleotide and Its metabolomics	-0.0556061	0.415284	0.202236	unchanged	-0.166443	0.0312571	0.936675	unchanged	-0.182178	0.0314996	1.43437	down
meta_494	Creatine phosphate	Nucleotide And Its metabolomics	Nucleotide and Its metabolomics	-0.199633	0.104699	0.83935	unchanged	-0.0883631	0.850336	0.139021	unchanged	0.522774	0.00216313	2.00243	up
meta_506	Guanine	Nucleotide And Its metabolomics	Nucleotide and Its metabolomics	-0.3076	0.294657	0.72279	unchanged	-2.38188	0.000396451	1.53855	down	0.810399	0.292076	0.753006	unchanged
meta_667	N6-(2-Hydroxyethyl)adenosine	Nucleotide And Its metabolomics	Nucleotide and Its metabolomics	-0.330902	0.00173086	1.75324	down	0.1584	0.18124	0.623205	unchanged	-0.193493	0.258753	0.87201	unchanged
meta_158	Octadecanamide	Alcohol and amines	Amines	0.274583	0.0525436	1.19854	unchanged	-0.221609	0.0725931	0.8889	unchanged	0.232181	0.0253044	1.58263	up
meta_379	Urea	Alcohol and amines	Amines	-0.335675	0.000907661	1.73687	down	-0.0594004	0.642901	0.282963	unchanged	0.0160211	0.938506	0.054586	unchanged
meta_453	Butylamine	Alcohol and amines	Amines	0.0340313	0.579782	0.670755	unchanged	-0.338386	0.010279	1.205	down	0.068427	0.620796	0.402043	unchanged
meta_575	Methylguanidine	Alcohol and amines	Amines	0.301734	0.186784	0.747251	unchanged	-0.385972	0.019175	1.1063	down	0.102356	0.400725	0.648556	unchanged
meta_593	Aniline	Alcohol and amines	Amines	-0.28523	0.0486519	1.03991	down	-0.299543	0.0173762	1.09472	down	0.00655364	0.711652	0.244052	unchanged
meta_594	Benzamide	Alcohol and amines	Amines	-0.622976	0.0184636	1.52848	down	0.351973	0.205213	0.629797	unchanged	-0.393809	0.191754	1.01814	unchanged
meta_209	Diphenylamine	Benzene and substituted derivatives	Benzene and substituted derivatives	-0.258113	2.82769e-09	2.94891	down	-0.0971514	0.052117	0.94253	unchanged	0.0928755	0.0664634	1.36855	unchanged
meta_473	1-Hydroxylamino-2-phenylethane	Benzene and substituted derivatives	Benzene and substituted derivatives	-0.127787	0.039024	1.18388	down	-0.0186466	0.591393	0.250788	unchanged	-0.0387872	0.478934	0.533414	unchanged
meta_646	3-Hydroxyphenylurea	Benzene and substituted derivatives	Benzene and substituted derivatives	0.0937203	0.100428	0.844828	unchanged	-0.325877	1.22921e-06	2.03341	down	-0.0113969	0.72602	0.249906	unchanged
meta_247	Bis(1-inositol) -3,1'-phosphate 1-phosphate	Alcohol and amines	Alcohols	0.122698	0.381805	0.527912	unchanged	-0.314057	0.0351376	1.05192	down	0.312332	0.0696203	1.22991	unchanged
meta_430	Sn-Glycero-3-Phosphocholine	Tryptamines,Cholines,Pigments	Cholines	-0.0156809	0.898407	0.0952148	unchanged	0.797186	2.33874e-05	1.85263	up	-0.127455	0.442187	0.566551	unchanged
meta_29	Taurochenodesoxycholic Acid	Bile acids	Bile acids	0.623014	0.00963917	1.91331	up	0.049607	0.785221	0.184754	unchanged	0.0330305	0.537829	0.416706	unchanged
meta_417	Taurocholic Acid Sodium Salt Hydrate	Bile acids	Bile acids	-0.120792	0.0782272	1.41934	unchanged	-0.371482	3.27792e-06	1.98126	down	-0.0950419	0.0548436	1.22039	unchanged
meta_489	Lithocholic acid	Bile acids	Bile acids	-1.32756	0.024143	1.54692	down	1.97811	0.0666599	0.916077	unchanged	-2.64869	0.238484	0.815626	unchanged
meta_28	4-Pyridoxic Acid	Heterocyclic compounds	Pteridines and derivatives	-0.616278	0.0170973	1.46933	down	0.819956	0.0226304	1.11919	up	0.285809	0.371545	0.53682	unchanged
meta_312	Ethionamide	Heterocyclic compounds	Pteridines and derivatives	0.142721	0.0465073	1.06134	up	-0.179482	0.0203072	1.0412	down	0.140198	0.0282253	1.43567	up
meta_418	4-(Aminomethyl)-5-(Hydroxymethyl)-2-Methylpyridin-3-Ol	Heterocyclic compounds	Pteridines and derivatives	-0.0851193	0.447514	0.814783	unchanged	-0.615391	4.02221e-07	2.10249	down	-0.0769903	0.419917	0.496503	unchanged
meta_460	6-Methylnicotinamide	Heterocyclic compounds	Pteridines and derivatives	-0.083268	0.130429	0.908459	unchanged	-4.40381	3.6132e-05	1.77702	down	2.39252	0.0606199	1.33677	unchanged
meta_634	Quinoline-2-carboxylic acid	Heterocyclic compounds	Pteridines and derivatives	-0.586734	0.102505	1.18236	unchanged	1.16727	0.0036253	1.34659	up	-0.252435	0.156201	1.07662	unchanged
meta_233	N,N′-dicyclohexylcarbodiimide	Alcohol and amines	Polyamines	0.209148	0.000984045	1.74007	up	-0.213267	0.000779954	1.52986	down	0.00273444	0.932985	0.0302957	unchanged
meta_447	Spermidine	Alcohol and amines	Polyamines	-0.0654943	0.537776	0.289808	unchanged	0.285229	0.0439622	0.998808	unchanged	-0.576252	0.0023884	2.13946	down
meta_472	Acetylcholine	Alcohol and amines	Polyamines	0.0664226	0.636978	0.13955	unchanged	-0.692884	0.00354626	1.31033	down	0.213946	0.310437	0.785578	unchanged
meta_498	N-Acetylcadaverine	Alcohol and amines	Polyamines	-0.157381	0.0716256	1.41503	unchanged	-0.47197	0.000344057	1.61935	down	0.272363	0.0454374	1.29034	up
meta_500	Hypotaurocyamine	Alcohol and amines	Polyamines	0.100229	0.943979	0.148958	unchanged	-4.7756	1.06383e-05	1.84492	down	0.789114	0.12449	1.09292	unchanged
meta_26	Terephthalic Acid	Benzene and substituted derivatives	Phenolic acids	0.122497	0.115622	0.63096	unchanged	-0.227448	0.00970931	1.15871	down	0.125327	0.0658952	1.27011	unchanged
meta_157	2-hydroxy-2-(4-hydroxy-3-methoxyphenyl)acetic acid	Benzene and substituted derivatives	Phenolic acids	0.15852	0.0801904	1.14843	unchanged	-0.347607	0.0510646	0.904479	unchanged	0.396835	0.0202408	1.58832	up
meta_383	2-Methoxybenzoic Acid	Benzene and substituted derivatives	Phenolic acids	0.445609	0.000366585	2.09596	up	-0.335102	0.00159477	1.43767	down	0.0219298	0.554872	0.455151	unchanged
meta_64	Orotic Acid	CoEnzyme and vitamins	CoEnzyme and vitamins	-0.0968296	0.638668	0.268628	unchanged	0.376815	0.0154409	1.14876	up	-0.1347	0.193632	0.856262	unchanged
meta_398	Nicotinamide	CoEnzyme and vitamins	CoEnzyme and vitamins	-0.143362	0.837869	0.202969	unchanged	-0.756142	0.00757826	1.19513	down	0.0775348	0.425815	0.568796	unchanged
meta_421	Pantetheine	CoEnzyme and vitamins	CoEnzyme and vitamins	0.152752	0.0188108	1.17575	up	-0.294959	2.97178e-05	1.8121	down	0.0106554	0.747835	0.246077	unchanged
meta_570	Pantothenol	CoEnzyme and vitamins	CoEnzyme and vitamins	-0.284359	0.467035	0.448331	unchanged	-0.860117	0.0248267	1.10866	down	0.0840224	0.326606	0.644587	unchanged
meta_48	Norepinephrine	Hormones and hormone related compunds	Hormones and hormone related compunds	0.0341252	0.521827	0.377708	unchanged	0.185333	0.486681	0.332351	unchanged	-0.495332	0.00176959	2.11598	down
meta_505	20,26-dihydroxyecdysone	Hormones and hormone related compunds	Hormones and hormone related compunds	-0.016792	0.392959	0.932037	unchanged	0.0590179	0.00178174	1.42464	up	-0.0353977	0.0404012	1.39521	down
meta_578	16-Dehydroprogesterone	Hormones and hormone related compunds	Hormones and hormone related compunds	-0.165724	0.678318	0.191414	unchanged	0.522305	0.0156201	1.1636	up	0.0678475	0.499833	0.491531	unchanged
meta_484	Kojibiose	Others	Others	0.592971	0.0107725	1.42949	up	-0.579355	0.0386542	0.961295	unchanged	1.39492	0.00148409	2.22263	up
meta_458	2-Pentyl-3-phenyl-2-propenal	Aldehyde,Ketones,Esters	Aldehydes	-0.0878923	0.304862	0.912126	unchanged	-0.443248	2.03205e-06	2.03225	down	0.0802061	0.117683	1.10513	unchanged
meta_402	5-Hydroxytryptophol	Heterocyclic compounds	Indole and Its derivatives	-0.0883635	0.231679	0.597602	unchanged	-0.602666	4.30325e-05	1.77292	down	0.18191	0.83244	0.268711	unchanged
meta_431	Indole	Heterocyclic compounds	Indole and Its derivatives	-0.0819448	0.258955	0.618578	unchanged	-0.225815	0.00248539	1.34297	down	-0.130047	0.0413925	1.34349	down
meta_441	Indole-3-acetamide	Heterocyclic compounds	Indole and Its derivatives	0.490959	0.0336682	1.66692	up	0.179335	0.772874	0.138496	unchanged	0.117525	0.36001	0.589903	unchanged
meta_677	3-Methyloxindole	Heterocyclic compounds	Indole and Its derivatives	-0.735358	0.00312096	1.71218	down	0.208176	0.268233	0.489281	unchanged	0.0408287	0.7044	0.274207	unchanged
meta_251	1-pyrroline-4-hydroxy-2-carboxylate	Heterocyclic compounds	Heterocyclic compounds	-0.380044	0.022092	1.16376	down	0.415892	0.0343186	1.02875	up	-0.466204	0.0186735	1.7016	down
meta_347	Hydroxypiperazic acid	Heterocyclic compounds	Heterocyclic compounds	0.140441	0.0764218	1.01603	unchanged	-0.342944	0.00793228	1.26159	down	-0.187445	0.130566	1.07923	unchanged
meta_442	2-Pyrrolidinone	Heterocyclic compounds	Heterocyclic compounds	-0.295241	0.0165052	0.990543	unchanged	0.641887	9.17224e-05	1.80087	up	-0.159778	0.308108	0.694288	unchanged
