# Supplementary figures and images for: Die praemilitaerische Ausbildung des Scipio Africanus
Source: Royal Society of Chemistry journal article supplement (doi:10.1039/d3mo00130j), 2003-01-01

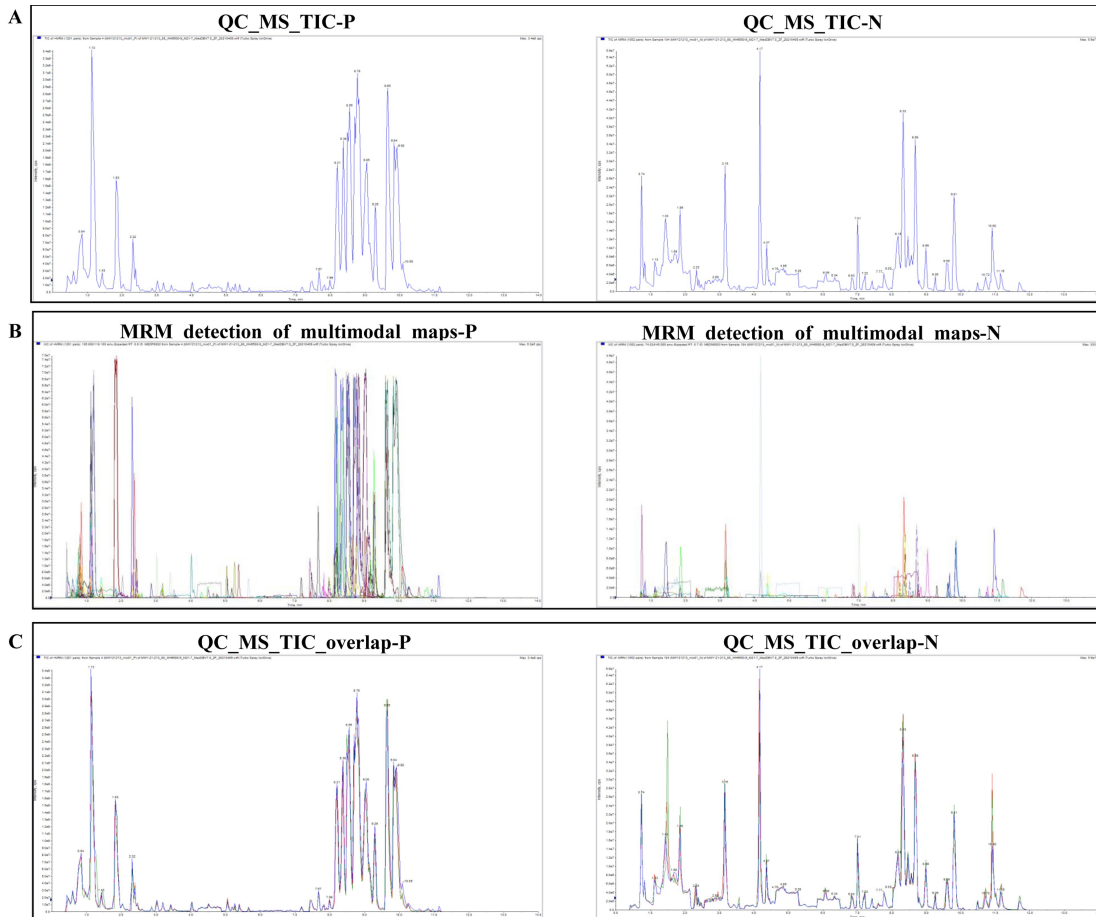

Supplement: d3mo00130j1.pdf [file d3mo00130j1.pdf]

### Sample clustering

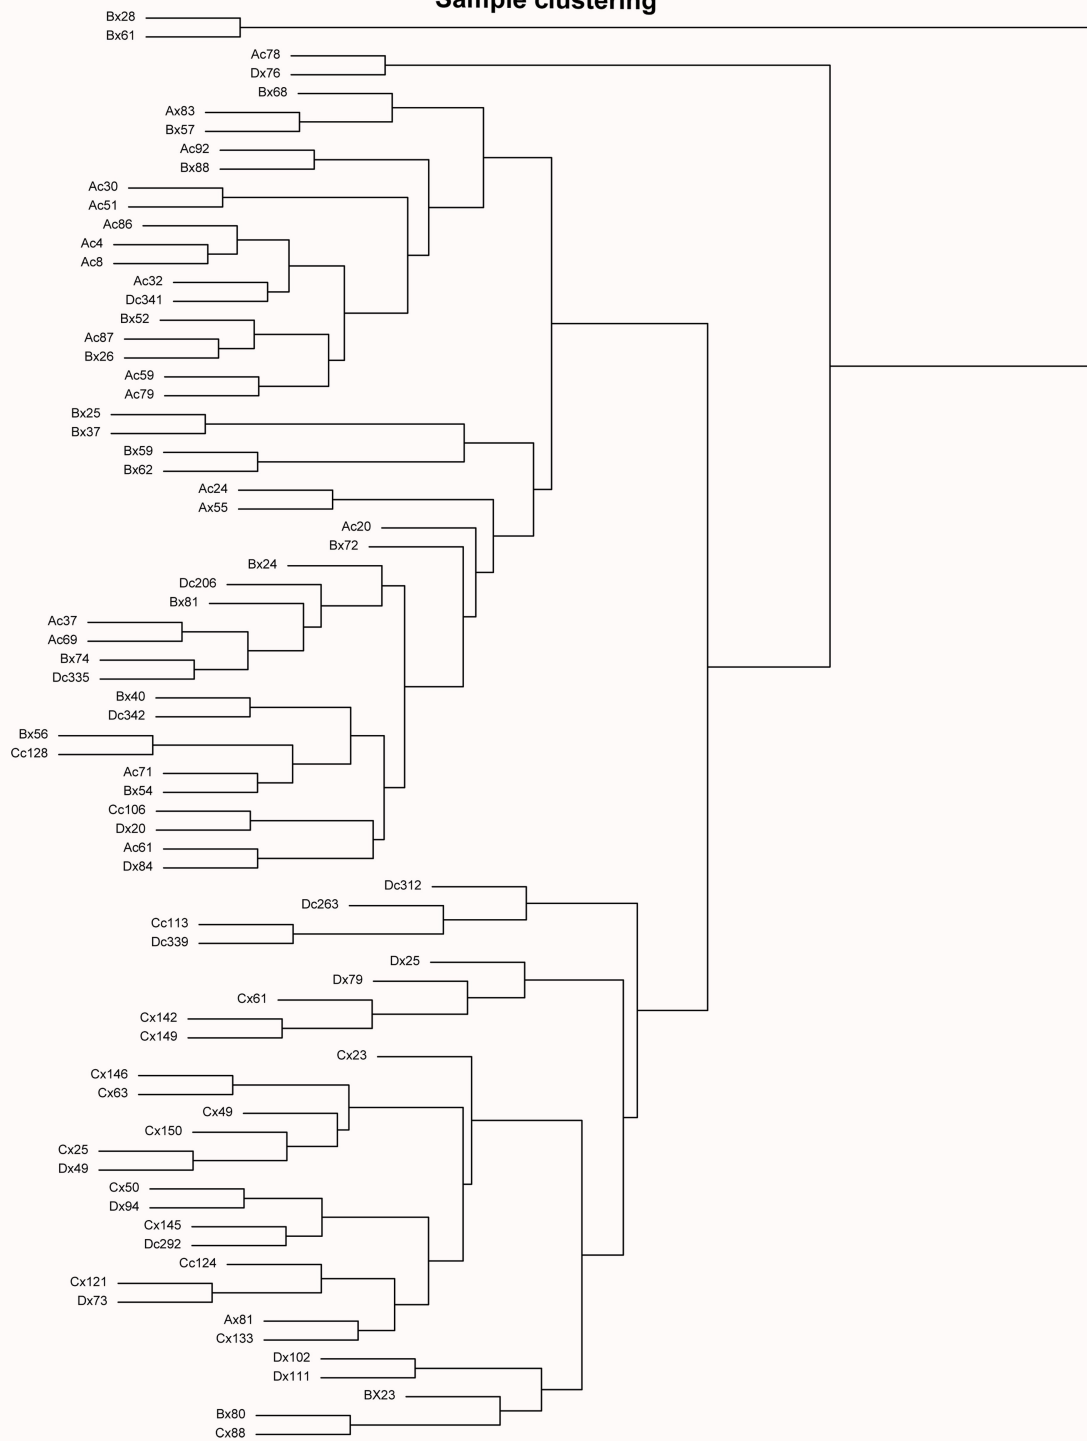

Supplement: d3mo00130j3.pdf [file d3mo00130j3.pdf]
